# Supplementary material for: Comprehensive pan-cancer analysis reveals that FBXO2 as a potential therapeutic target associated with immune infiltration
Source: Research Square preprint supplement (doi:10.21203/rs.3.rs-8578038/v1), 2026-02-09
Supplement: Supplementary file 1 [file 4f30b3aa472204e2337221c6.xlsx]

## Sheet: Sheet1
Cancer_Type	Patient_ID	PSI	SpliceEvent	GeneSymbol	GeneID	ChrStrand	SpliceType	EventRegion	AltRegion	pctSamples	stdPSI	MedianPSI	RangePSI
CHOL	TCGA-3X-AAV9-01A-72R-A41I-07.59012a78-0e8f-4b99-af97-0dbb1d3d0513.aligned	0.699	intron_retention_8113	FBXO2	ENSG00000116661.9	chr1 | -	IR	11709584:11709931-11709931:11710022-11710022:11710131	11709584:11710131	0.409	0.1941	0.83	0.48
CHOL	TCGA-3X-AAVA-01A-11R-A41I-07.6a8ffc5d-444e-4864-bafd-ddf1ef900ef0.aligned		intron_retention_8113	FBXO2	ENSG00000116661.9	chr1 | -	IR	11709584:11709931-11709931:11710022-11710022:11710131	11709584:11710131	0.409	0.1941	0.83	0.48
CHOL	TCGA-3X-AAVB-01A-31R-A41I-07.88336d42-a31c-448f-a077-2608786c80fe.aligned		intron_retention_8113	FBXO2	ENSG00000116661.9	chr1 | -	IR	11709584:11709931-11709931:11710022-11710022:11710131	11709584:11710131	0.409	0.1941	0.83	0.48
CHOL	TCGA-3X-AAVC-01A-21R-A41I-07.8c8d5e98-023b-4496-a237-2632c609f627.aligned	0.573	intron_retention_8113	FBXO2	ENSG00000116661.9	chr1 | -	IR	11709584:11709931-11709931:11710022-11710022:11710131	11709584:11710131	0.409	0.1941	0.83	0.48
CHOL	TCGA-3X-AAVE-01A-11R-A41I-07.c49a7f2a-f7ef-419d-829a-0b3a9f915aad.aligned		intron_retention_8113	FBXO2	ENSG00000116661.9	chr1 | -	IR	11709584:11709931-11709931:11710022-11710022:11710131	11709584:11710131	0.409	0.1941	0.83	0.48
CHOL	TCGA-4G-AAZO-01A-12R-A41I-07.f36ef26a-5c56-422b-bcdf-4693615d026b.aligned		intron_retention_8113	FBXO2	ENSG00000116661.9	chr1 | -	IR	11709584:11709931-11709931:11710022-11710022:11710131	11709584:11710131	0.409	0.1941	0.83	0.48
CHOL	TCGA-W5-AA2G-01A-11R-A41I-07.0431cd43-2dd6-4319-8017-6ed8b8e77dc0.aligned		intron_retention_8113	FBXO2	ENSG00000116661.9	chr1 | -	IR	11709584:11709931-11709931:11710022-11710022:11710131	11709584:11710131	0.409	0.1941	0.83	0.48
CHOL	TCGA-W5-AA2H-01A-31R-A41I-07.b0ada585-0834-406b-b02c-b06c171882ff.aligned		intron_retention_8113	FBXO2	ENSG00000116661.9	chr1 | -	IR	11709584:11709931-11709931:11710022-11710022:11710131	11709584:11710131	0.409	0.1941	0.83	0.48
CHOL	TCGA-W5-AA2I-01A-32R-A41I-07.51dfbd25-fa30-4ac5-b375-fde6ddbaa151.aligned		intron_retention_8113	FBXO2	ENSG00000116661.9	chr1 | -	IR	11709584:11709931-11709931:11710022-11710022:11710131	11709584:11710131	0.409	0.1941	0.83	0.48
CHOL	TCGA-W5-AA2I-11A-11R-A41I-07.a8aea83d-802a-48b3-aea2-65e78fefc9b0.aligned	1	intron_retention_8113	FBXO2	ENSG00000116661.9	chr1 | -	IR	11709584:11709931-11709931:11710022-11710022:11710131	11709584:11710131	0.409	0.1941	0.83	0.48
CHOL	TCGA-W5-AA2O-01A-11R-A41I-07.0e8deabe-78a0-4960-8dc0-1afb483f409d.aligned		intron_retention_8113	FBXO2	ENSG00000116661.9	chr1 | -	IR	11709584:11709931-11709931:11710022-11710022:11710131	11709584:11710131	0.409	0.1941	0.83	0.48
CHOL	TCGA-W5-AA2Q-01A-11R-A41I-07.60f80712-30c2-4026-9853-9733f641c05f.aligned	0.669	intron_retention_8113	FBXO2	ENSG00000116661.9	chr1 | -	IR	11709584:11709931-11709931:11710022-11710022:11710131	11709584:11710131	0.409	0.1941	0.83	0.48
CHOL	TCGA-W5-AA2Q-11A-11R-A41I-07.f86273ce-18c0-47f3-af69-2eac38089508.aligned		intron_retention_8113	FBXO2	ENSG00000116661.9	chr1 | -	IR	11709584:11709931-11709931:11710022-11710022:11710131	11709584:11710131	0.409	0.1941	0.83	0.48
CHOL	TCGA-W5-AA2R-01A-11R-A41I-07.d3b1d5c8-a823-4630-a160-599bc0d5fb9a.aligned	0.52	intron_retention_8113	FBXO2	ENSG00000116661.9	chr1 | -	IR	11709584:11709931-11709931:11710022-11710022:11710131	11709584:11710131	0.409	0.1941	0.83	0.48
CHOL	TCGA-W5-AA2R-11A-11R-A41I-07.2649a2ec-8bb0-486e-9eec-ac9c76021b60.aligned		intron_retention_8113	FBXO2	ENSG00000116661.9	chr1 | -	IR	11709584:11709931-11709931:11710022-11710022:11710131	11709584:11710131	0.409	0.1941	0.83	0.48
CHOL	TCGA-W5-AA2T-01A-12R-A41I-07.d6580402-f691-479a-8b3c-582547b22b0c.aligned		intron_retention_8113	FBXO2	ENSG00000116661.9	chr1 | -	IR	11709584:11709931-11709931:11710022-11710022:11710131	11709584:11710131	0.409	0.1941	0.83	0.48
CHOL	TCGA-W5-AA2U-01A-11R-A41I-07.41df36db-590f-4410-8d1d-b9afbbc9cecc.aligned		intron_retention_8113	FBXO2	ENSG00000116661.9	chr1 | -	IR	11709584:11709931-11709931:11710022-11710022:11710131	11709584:11710131	0.409	0.1941	0.83	0.48
CHOL	TCGA-W5-AA2U-11A-11R-A41I-07.a59098ee-abee-46cc-af4a-cca9d501daec.aligned		intron_retention_8113	FBXO2	ENSG00000116661.9	chr1 | -	IR	11709584:11709931-11709931:11710022-11710022:11710131	11709584:11710131	0.409	0.1941	0.83	0.48
CHOL	TCGA-W5-AA2W-01A-11R-A41I-07.6fcc3918-f4b0-42ab-b00c-027175606cbd.aligned		intron_retention_8113	FBXO2	ENSG00000116661.9	chr1 | -	IR	11709584:11709931-11709931:11710022-11710022:11710131	11709584:11710131	0.409	0.1941	0.83	0.48
CHOL	TCGA-W5-AA2X-01A-11R-A41I-07.1d507dd2-bb72-4305-a858-68fccae00d5e.aligned	1	intron_retention_8113	FBXO2	ENSG00000116661.9	chr1 | -	IR	11709584:11709931-11709931:11710022-11710022:11710131	11709584:11710131	0.409	0.1941	0.83	0.48
CHOL	TCGA-W5-AA2X-11A-11R-A41I-07.a6369fb0-1ca6-4215-9f2b-f4e8647e6f5a.aligned		intron_retention_8113	FBXO2	ENSG00000116661.9	chr1 | -	IR	11709584:11709931-11709931:11710022-11710022:11710131	11709584:11710131	0.409	0.1941	0.83	0.48
CHOL	TCGA-W5-AA2Z-01A-11R-A41I-07.df40ecd0-42b7-45be-9789-098cc3c85f34.aligned	0.668	intron_retention_8113	FBXO2	ENSG00000116661.9	chr1 | -	IR	11709584:11709931-11709931:11710022-11710022:11710131	11709584:11710131	0.409	0.1941	0.83	0.48
CHOL	TCGA-W5-AA30-01A-31R-A41I-07.f53d3bb4-4d10-4321-b41b-87fed60e6fc1.aligned		intron_retention_8113	FBXO2	ENSG00000116661.9	chr1 | -	IR	11709584:11709931-11709931:11710022-11710022:11710131	11709584:11710131	0.409	0.1941	0.83	0.48
CHOL	TCGA-W5-AA30-11A-11R-A41I-07.e819d2ae-9cfb-4256-a15c-23fbb3683ee7.aligned		intron_retention_8113	FBXO2	ENSG00000116661.9	chr1 | -	IR	11709584:11709931-11709931:11710022-11710022:11710131	11709584:11710131	0.409	0.1941	0.83	0.48
CHOL	TCGA-W5-AA31-01A-11R-A41I-07.b4468779-3068-40d2-809c-7b513d0a752f.aligned	0.689	intron_retention_8113	FBXO2	ENSG00000116661.9	chr1 | -	IR	11709584:11709931-11709931:11710022-11710022:11710131	11709584:11710131	0.409	0.1941	0.83	0.48
CHOL	TCGA-W5-AA31-11A-11R-A41I-07.699c7545-9b63-4b7d-9f65-fc538ac31ff3.aligned		intron_retention_8113	FBXO2	ENSG00000116661.9	chr1 | -	IR	11709584:11709931-11709931:11710022-11710022:11710131	11709584:11710131	0.409	0.1941	0.83	0.48
CHOL	TCGA-W5-AA33-01A-11R-A41I-07.e67b53ac-771f-4b92-aad8-da78c97f4bcb.aligned		intron_retention_8113	FBXO2	ENSG00000116661.9	chr1 | -	IR	11709584:11709931-11709931:11710022-11710022:11710131	11709584:11710131	0.409	0.1941	0.83	0.48
CHOL	TCGA-W5-AA34-01A-11R-A41I-07.84e6718b-08c9-475d-906d-045e8f5477a0.aligned	1	intron_retention_8113	FBXO2	ENSG00000116661.9	chr1 | -	IR	11709584:11709931-11709931:11710022-11710022:11710131	11709584:11710131	0.409	0.1941	0.83	0.48
CHOL	TCGA-W5-AA34-11A-11R-A41I-07.9d7ac93a-ca45-44ed-a326-5e404e0d3b85.aligned	0.572	intron_retention_8113	FBXO2	ENSG00000116661.9	chr1 | -	IR	11709584:11709931-11709931:11710022-11710022:11710131	11709584:11710131	0.409	0.1941	0.83	0.48
CHOL	TCGA-W5-AA36-01A-11R-A41I-07.b8dabef1-a207-4c40-bf80-d61ad7dbf571.aligned		intron_retention_8113	FBXO2	ENSG00000116661.9	chr1 | -	IR	11709584:11709931-11709931:11710022-11710022:11710131	11709584:11710131	0.409	0.1941	0.83	0.48
CHOL	TCGA-W5-AA38-01A-11R-A41I-07.cf410999-4cac-4f7b-9062-bfd807c50355.aligned	0.687	intron_retention_8113	FBXO2	ENSG00000116661.9	chr1 | -	IR	11709584:11709931-11709931:11710022-11710022:11710131	11709584:11710131	0.409	0.1941	0.83	0.48
CHOL	TCGA-W5-AA39-01A-11R-A41I-07.342a4721-d5b0-487f-a2a7-a8ef6b7a924c.aligned		intron_retention_8113	FBXO2	ENSG00000116661.9	chr1 | -	IR	11709584:11709931-11709931:11710022-11710022:11710131	11709584:11710131	0.409	0.1941	0.83	0.48
CHOL	TCGA-W6-AA0S-01A-11R-A41I-07.f5475a42-4520-4124-9ace-8c0ed9eabefb.aligned	1	intron_retention_8113	FBXO2	ENSG00000116661.9	chr1 | -	IR	11709584:11709931-11709931:11710022-11710022:11710131	11709584:11710131	0.409	0.1941	0.83	0.48
CHOL	TCGA-WD-A7RX-01A-12R-A41I-07.015b2409-ca2e-4141-8266-fe619793761c.aligned	1	intron_retention_8113	FBXO2	ENSG00000116661.9	chr1 | -	IR	11709584:11709931-11709931:11710022-11710022:11710131	11709584:11710131	0.409	0.1941	0.83	0.48
CHOL	TCGA-YR-A95A-01A-12R-A41I-07.7bb15e31-2b7d-4926-b78a-0d2aa7bddd78.aligned		intron_retention_8113	FBXO2	ENSG00000116661.9	chr1 | -	IR	11709584:11709931-11709931:11710022-11710022:11710131	11709584:11710131	0.409	0.1941	0.83	0.48
CHOL	TCGA-ZD-A8I3-01A-11R-A41I-07.be89bf4d-75f7-4596-9251-490976f7e254.aligned	1	intron_retention_8113	FBXO2	ENSG00000116661.9	chr1 | -	IR	11709584:11709931-11709931:11710022-11710022:11710131	11709584:11710131	0.409	0.1941	0.83	0.48
CHOL	TCGA-ZH-A8Y1-01A-11R-A41I-07.11aba6d6-271d-4d59-a2be-8cbd88a48d40.aligned		intron_retention_8113	FBXO2	ENSG00000116661.9	chr1 | -	IR	11709584:11709931-11709931:11710022-11710022:11710131	11709584:11710131	0.409	0.1941	0.83	0.48
CHOL	TCGA-ZH-A8Y2-01A-11R-A41I-07.63a3bd41-6a68-4eb5-ad4f-0fd05be97ac1.aligned	1	intron_retention_8113	FBXO2	ENSG00000116661.9	chr1 | -	IR	11709584:11709931-11709931:11710022-11710022:11710131	11709584:11710131	0.409	0.1941	0.83	0.48
CHOL	TCGA-ZH-A8Y4-01A-11R-A41I-07.012cd145-9f6c-4b79-b929-3f42f61e3dce.aligned	0.961	intron_retention_8113	FBXO2	ENSG00000116661.9	chr1 | -	IR	11709584:11709931-11709931:11710022-11710022:11710131	11709584:11710131	0.409	0.1941	0.83	0.48
CHOL	TCGA-ZH-A8Y5-01A-11R-A41I-07.f7f581cf-3c93-4eaf-9f10-299006f058ce.aligned		intron_retention_8113	FBXO2	ENSG00000116661.9	chr1 | -	IR	11709584:11709931-11709931:11710022-11710022:11710131	11709584:11710131	0.409	0.1941	0.83	0.48
CHOL	TCGA-ZH-A8Y6-01A-11R-A41I-07.f322aedd-a561-4b14-b2e3-f60087b705f7.aligned	1	intron_retention_8113	FBXO2	ENSG00000116661.9	chr1 | -	IR	11709584:11709931-11709931:11710022-11710022:11710131	11709584:11710131	0.409	0.1941	0.83	0.48
CHOL	TCGA-ZH-A8Y8-01A-51R-A41I-07.6d6c5a87-0773-418f-ae97-52e1cec8b8b1.aligned	0.587	intron_retention_8113	FBXO2	ENSG00000116661.9	chr1 | -	IR	11709584:11709931-11709931:11710022-11710022:11710131	11709584:11710131	0.409	0.1941	0.83	0.48
CHOL	TCGA-ZU-A8S4-01A-11R-A41I-07.5cd9444b-4c4c-489a-b491-583da5510c80.aligned		intron_retention_8113	FBXO2	ENSG00000116661.9	chr1 | -	IR	11709584:11709931-11709931:11710022-11710022:11710131	11709584:11710131	0.409	0.1941	0.83	0.48
CHOL	TCGA-ZU-A8S4-11A-11R-A41I-07.bd5dc5da-bd55-45d8-a045-93d99b737f0a.aligned		intron_retention_8113	FBXO2	ENSG00000116661.9	chr1 | -	IR	11709584:11709931-11709931:11710022-11710022:11710131	11709584:11710131	0.409	0.1941	0.83	0.48
ACC	TCGA-OR-A5J1-01A-11R-A29S-07.37e88158-0743-45b8-87cf-1d7fe878527f.aligned	1	intron_retention_8113	FBXO2	ENSG00000116661.9	chr1 | -	IR	11709584:11709931-11709931:11710022-11710022:11710131	11709584:11710131	0.611	0.1395	1	0.431
ACC	TCGA-OR-A5J2-01A-11R-A29S-07.421bbd6b-fb2a-4a6d-a298-057c1b65f041.aligned	1	intron_retention_8113	FBXO2	ENSG00000116661.9	chr1 | -	IR	11709584:11709931-11709931:11710022-11710022:11710131	11709584:11710131	0.611	0.1395	1	0.431
ACC	TCGA-OR-A5J3-01A-11R-A29S-07.83b02107-0c7c-450d-84aa-9ed4e1d755c5.aligned		intron_retention_8113	FBXO2	ENSG00000116661.9	chr1 | -	IR	11709584:11709931-11709931:11710022-11710022:11710131	11709584:11710131	0.611	0.1395	1	0.431
ACC	TCGA-OR-A5J6-01A-31R-A29S-07.bb6e0e73-ff48-4627-bce6-f672c06b7de4.aligned	1	intron_retention_8113	FBXO2	ENSG00000116661.9	chr1 | -	IR	11709584:11709931-11709931:11710022-11710022:11710131	11709584:11710131	0.611	0.1395	1	0.431
ACC	TCGA-OR-A5J7-01A-11R-A29S-07.59eb3b91-d706-45de-9bbe-92b32629c58c.aligned		intron_retention_8113	FBXO2	ENSG00000116661.9	chr1 | -	IR	11709584:11709931-11709931:11710022-11710022:11710131	11709584:11710131	0.611	0.1395	1	0.431
ACC	TCGA-OR-A5J8-01A-11R-A29S-07.73fee5d0-d326-484c-95c6-c40c987c6917.aligned		intron_retention_8113	FBXO2	ENSG00000116661.9	chr1 | -	IR	11709584:11709931-11709931:11710022-11710022:11710131	11709584:11710131	0.611	0.1395	1	0.431
ACC	TCGA-OR-A5J9-01A-11R-A29S-07.a818d2cc-4d45-40df-bfcb-9fa08ebf8490.aligned	1	intron_retention_8113	FBXO2	ENSG00000116661.9	chr1 | -	IR	11709584:11709931-11709931:11710022-11710022:11710131	11709584:11710131	0.611	0.1395	1	0.431
ACC	TCGA-OR-A5JA-01A-11R-A29S-07.d979c964-68e1-4ea4-a473-69b69cba8e5c.aligned		intron_retention_8113	FBXO2	ENSG00000116661.9	chr1 | -	IR	11709584:11709931-11709931:11710022-11710022:11710131	11709584:11710131	0.611	0.1395	1	0.431
ACC	TCGA-OR-A5JB-01A-11R-A29S-07.26861b93-29de-42df-80d6-23260d450391.aligned	1	intron_retention_8113	FBXO2	ENSG00000116661.9	chr1 | -	IR	11709584:11709931-11709931:11710022-11710022:11710131	11709584:11710131	0.611	0.1395	1	0.431
ACC	TCGA-OR-A5JC-01A-11R-A29S-07.c51255ac-840d-44c2-87ae-ed91cc635e85.aligned	1	intron_retention_8113	FBXO2	ENSG00000116661.9	chr1 | -	IR	11709584:11709931-11709931:11710022-11710022:11710131	11709584:11710131	0.611	0.1395	1	0.431
ACC	TCGA-OR-A5JD-01A-11R-A29S-07.8067d29d-a249-42b9-bd9e-de47513a4230.aligned	1	intron_retention_8113	FBXO2	ENSG00000116661.9	chr1 | -	IR	11709584:11709931-11709931:11710022-11710022:11710131	11709584:11710131	0.611	0.1395	1	0.431
ACC	TCGA-OR-A5JE-01A-11R-A29S-07.223e2af0-95a2-49f2-84a2-13379cf72ea9.aligned		intron_retention_8113	FBXO2	ENSG00000116661.9	chr1 | -	IR	11709584:11709931-11709931:11710022-11710022:11710131	11709584:11710131	0.611	0.1395	1	0.431
ACC	TCGA-OR-A5JF-01A-11R-A29S-07.ba350477-3c49-4258-8409-f39447687497.aligned	1	intron_retention_8113	FBXO2	ENSG00000116661.9	chr1 | -	IR	11709584:11709931-11709931:11710022-11710022:11710131	11709584:11710131	0.611	0.1395	1	0.431
ACC	TCGA-OR-A5JG-01A-11R-A29S-07.60c8c1da-fea6-41f7-ba5b-33afba1ef301.aligned		intron_retention_8113	FBXO2	ENSG00000116661.9	chr1 | -	IR	11709584:11709931-11709931:11710022-11710022:11710131	11709584:11710131	0.611	0.1395	1	0.431
ACC	TCGA-OR-A5JI-01A-11R-A29S-07.d5a1b1c5-f790-4733-a8f5-09372d695688.aligned	0.759	intron_retention_8113	FBXO2	ENSG00000116661.9	chr1 | -	IR	11709584:11709931-11709931:11710022-11710022:11710131	11709584:11710131	0.611	0.1395	1	0.431
ACC	TCGA-OR-A5JJ-01A-11R-A29S-07.39336e11-24de-43be-913a-c764310d1eee.aligned		intron_retention_8113	FBXO2	ENSG00000116661.9	chr1 | -	IR	11709584:11709931-11709931:11710022-11710022:11710131	11709584:11710131	0.611	0.1395	1	0.431
ACC	TCGA-OR-A5JK-01A-11R-A29S-07.db5bc4cb-f0bc-4c26-bd11-1bf918466263.aligned	0.719	intron_retention_8113	FBXO2	ENSG00000116661.9	chr1 | -	IR	11709584:11709931-11709931:11710022-11710022:11710131	11709584:11710131	0.611	0.1395	1	0.431
ACC	TCGA-OR-A5JL-01A-11R-A29S-07.3e28c232-4f00-446e-8e2c-13b7ce533442.aligned	1	intron_retention_8113	FBXO2	ENSG00000116661.9	chr1 | -	IR	11709584:11709931-11709931:11710022-11710022:11710131	11709584:11710131	0.611	0.1395	1	0.431
ACC	TCGA-OR-A5JM-01A-11R-A29S-07.908285b8-1e2e-4aed-86df-2aaeb1bcefea.aligned		intron_retention_8113	FBXO2	ENSG00000116661.9	chr1 | -	IR	11709584:11709931-11709931:11710022-11710022:11710131	11709584:11710131	0.611	0.1395	1	0.431
ACC	TCGA-OR-A5JO-01A-11R-A29S-07.ebc120e7-d75d-425a-b9af-aa0e76520642.aligned		intron_retention_8113	FBXO2	ENSG00000116661.9	chr1 | -	IR	11709584:11709931-11709931:11710022-11710022:11710131	11709584:11710131	0.611	0.1395	1	0.431
ACC	TCGA-OR-A5JP-01A-11R-A29S-07.49e3ffbc-f75f-4f3d-99de-12c29ef69154.aligned		intron_retention_8113	FBXO2	ENSG00000116661.9	chr1 | -	IR	11709584:11709931-11709931:11710022-11710022:11710131	11709584:11710131	0.611	0.1395	1	0.431
ACC	TCGA-OR-A5JQ-01A-11R-A29S-07.f0461f9a-e85e-42c6-8f4b-e5974a0e78f8.aligned	1	intron_retention_8113	FBXO2	ENSG00000116661.9	chr1 | -	IR	11709584:11709931-11709931:11710022-11710022:11710131	11709584:11710131	0.611	0.1395	1	0.431
ACC	TCGA-OR-A5JR-01A-11R-A29S-07.cc3d79b1-66a4-4f17-bdb1-c91ffab17037.aligned	1	intron_retention_8113	FBXO2	ENSG00000116661.9	chr1 | -	IR	11709584:11709931-11709931:11710022-11710022:11710131	11709584:11710131	0.611	0.1395	1	0.431
ACC	TCGA-OR-A5JS-01A-11R-A29S-07.68b2e310-e0a0-4867-b9cf-69b43cbdabce.aligned	1	intron_retention_8113	FBXO2	ENSG00000116661.9	chr1 | -	IR	11709584:11709931-11709931:11710022-11710022:11710131	11709584:11710131	0.611	0.1395	1	0.431
ACC	TCGA-OR-A5JT-01A-11R-A29S-07.36c36f8f-d15b-43be-a285-1f80fcfff555.aligned	0.663	intron_retention_8113	FBXO2	ENSG00000116661.9	chr1 | -	IR	11709584:11709931-11709931:11710022-11710022:11710131	11709584:11710131	0.611	0.1395	1	0.431
ACC	TCGA-OR-A5JV-01A-11R-A29S-07.20938e21-2846-4553-98eb-6b005b6600c3.aligned	1	intron_retention_8113	FBXO2	ENSG00000116661.9	chr1 | -	IR	11709584:11709931-11709931:11710022-11710022:11710131	11709584:11710131	0.611	0.1395	1	0.431
ACC	TCGA-OR-A5JW-01A-11R-A29S-07.a499a77e-4584-4cab-a7d9-3d0b42ed4dd8.aligned	1	intron_retention_8113	FBXO2	ENSG00000116661.9	chr1 | -	IR	11709584:11709931-11709931:11710022-11710022:11710131	11709584:11710131	0.611	0.1395	1	0.431
ACC	TCGA-OR-A5JY-01A-31R-A29S-07.1fe73f5c-591d-4c55-ae0e-a67afb64f872.aligned		intron_retention_8113	FBXO2	ENSG00000116661.9	chr1 | -	IR	11709584:11709931-11709931:11710022-11710022:11710131	11709584:11710131	0.611	0.1395	1	0.431
ACC	TCGA-OR-A5JZ-01A-11R-A29S-07.efd8ce67-122c-4502-8713-2f4dd768c33d.aligned	0.745	intron_retention_8113	FBXO2	ENSG00000116661.9	chr1 | -	IR	11709584:11709931-11709931:11710022-11710022:11710131	11709584:11710131	0.611	0.1395	1	0.431
ACC	TCGA-OR-A5K0-01A-11R-A29S-07.e1434398-dde0-4855-adc1-24c2956d817a.aligned	1	intron_retention_8113	FBXO2	ENSG00000116661.9	chr1 | -	IR	11709584:11709931-11709931:11710022-11710022:11710131	11709584:11710131	0.611	0.1395	1	0.431
ACC	TCGA-OR-A5K1-01A-11R-A29S-07.b6c575a4-ebbc-413d-955d-bb3c46ec50c2.aligned	0.756	intron_retention_8113	FBXO2	ENSG00000116661.9	chr1 | -	IR	11709584:11709931-11709931:11710022-11710022:11710131	11709584:11710131	0.611	0.1395	1	0.431
ACC	TCGA-OR-A5K2-01A-11R-A29S-07.e85fc5ec-7838-46c3-8767-a69f765b066d.aligned	1	intron_retention_8113	FBXO2	ENSG00000116661.9	chr1 | -	IR	11709584:11709931-11709931:11710022-11710022:11710131	11709584:11710131	0.611	0.1395	1	0.431
ACC	TCGA-OR-A5K3-01A-11R-A29S-07.61d60013-6ffd-4c08-b03f-a8820db32397.aligned		intron_retention_8113	FBXO2	ENSG00000116661.9	chr1 | -	IR	11709584:11709931-11709931:11710022-11710022:11710131	11709584:11710131	0.611	0.1395	1	0.431
ACC	TCGA-OR-A5K4-01A-11R-A29S-07.5c9ae88c-353f-450b-80e6-8d36d7bc8be3.aligned	0.677	intron_retention_8113	FBXO2	ENSG00000116661.9	chr1 | -	IR	11709584:11709931-11709931:11710022-11710022:11710131	11709584:11710131	0.611	0.1395	1	0.431
ACC	TCGA-OR-A5K5-01A-11R-A29S-07.c70685d2-1d32-44f9-9ce6-e44b229e0bb0.aligned	1	intron_retention_8113	FBXO2	ENSG00000116661.9	chr1 | -	IR	11709584:11709931-11709931:11710022-11710022:11710131	11709584:11710131	0.611	0.1395	1	0.431
ACC	TCGA-OR-A5K6-01A-11R-A29S-07.eeda9161-2cf5-4ae2-b8ca-99bd13c053e4.aligned	1	intron_retention_8113	FBXO2	ENSG00000116661.9	chr1 | -	IR	11709584:11709931-11709931:11710022-11710022:11710131	11709584:11710131	0.611	0.1395	1	0.431
ACC	TCGA-OR-A5K8-01A-11R-A29S-07.53390804-e59b-4e73-aee4-89daa7cde164.aligned		intron_retention_8113	FBXO2	ENSG00000116661.9	chr1 | -	IR	11709584:11709931-11709931:11710022-11710022:11710131	11709584:11710131	0.611	0.1395	1	0.431
ACC	TCGA-OR-A5K9-01A-11R-A29S-07.48dd74fe-11ff-4514-87b3-1569e9606c73.aligned		intron_retention_8113	FBXO2	ENSG00000116661.9	chr1 | -	IR	11709584:11709931-11709931:11710022-11710022:11710131	11709584:11710131	0.611	0.1395	1	0.431
ACC	TCGA-OR-A5KO-01A-11R-A29S-07.0ffc0b01-bc1c-4277-8fc4-865590dcc461.aligned		intron_retention_8113	FBXO2	ENSG00000116661.9	chr1 | -	IR	11709584:11709931-11709931:11710022-11710022:11710131	11709584:11710131	0.611	0.1395	1	0.431
ACC	TCGA-OR-A5KT-01A-11R-A29S-07.8448744c-2c5f-4a95-b517-5652f6bacc1a.aligned		intron_retention_8113	FBXO2	ENSG00000116661.9	chr1 | -	IR	11709584:11709931-11709931:11710022-11710022:11710131	11709584:11710131	0.611	0.1395	1	0.431
ACC	TCGA-OR-A5KU-01A-11R-A29S-07.c2e40ad2-0d7f-4e25-a93a-f9dba30bc838.aligned	1	intron_retention_8113	FBXO2	ENSG00000116661.9	chr1 | -	IR	11709584:11709931-11709931:11710022-11710022:11710131	11709584:11710131	0.611	0.1395	1	0.431
ACC	TCGA-OR-A5KV-01A-11R-A29S-07.512b54a3-49c4-4dbd-b853-290500c00e81.aligned	1	intron_retention_8113	FBXO2	ENSG00000116661.9	chr1 | -	IR	11709584:11709931-11709931:11710022-11710022:11710131	11709584:11710131	0.611	0.1395	1	0.431
ACC	TCGA-OR-A5KW-01A-11R-A29S-07.64934de4-399f-4fbc-b283-979ab40addbc.aligned		intron_retention_8113	FBXO2	ENSG00000116661.9	chr1 | -	IR	11709584:11709931-11709931:11710022-11710022:11710131	11709584:11710131	0.611	0.1395	1	0.431
ACC	TCGA-OR-A5KX-01A-11R-A29S-07.180a84c1-99c0-4014-b42e-8e01f88980aa.aligned		intron_retention_8113	FBXO2	ENSG00000116661.9	chr1 | -	IR	11709584:11709931-11709931:11710022-11710022:11710131	11709584:11710131	0.611	0.1395	1	0.431
ACC	TCGA-OR-A5KY-01A-11R-A29S-07.bf4dc301-6b99-46c3-bdc4-d85905688e05.aligned		intron_retention_8113	FBXO2	ENSG00000116661.9	chr1 | -	IR	11709584:11709931-11709931:11710022-11710022:11710131	11709584:11710131	0.611	0.1395	1	0.431
ACC	TCGA-OR-A5KZ-01A-11R-A29S-07.6991a561-ff49-4546-9bc7-74cca88916ae.aligned		intron_retention_8113	FBXO2	ENSG00000116661.9	chr1 | -	IR	11709584:11709931-11709931:11710022-11710022:11710131	11709584:11710131	0.611	0.1395	1	0.431
ACC	TCGA-OR-A5L4-01A-11R-A29S-07.67affce9-7c50-46c9-9f1c-f80c1dd9c888.aligned	1	intron_retention_8113	FBXO2	ENSG00000116661.9	chr1 | -	IR	11709584:11709931-11709931:11710022-11710022:11710131	11709584:11710131	0.611	0.1395	1	0.431
ACC	TCGA-OR-A5L5-01A-11R-A29S-07.2928fe95-b646-44a3-808a-36f0751c887b.aligned	0.727	intron_retention_8113	FBXO2	ENSG00000116661.9	chr1 | -	IR	11709584:11709931-11709931:11710022-11710022:11710131	11709584:11710131	0.611	0.1395	1	0.431
ACC	TCGA-OR-A5L6-01A-11R-A29S-07.68206c96-7d72-43e9-92c8-75f6b5a3f14c.aligned	0.748	intron_retention_8113	FBXO2	ENSG00000116661.9	chr1 | -	IR	11709584:11709931-11709931:11710022-11710022:11710131	11709584:11710131	0.611	0.1395	1	0.431
ACC	TCGA-OR-A5L8-01A-11R-A29S-07.3fd3dae2-aeeb-4d42-abcd-7ff49079e909.aligned	1	intron_retention_8113	FBXO2	ENSG00000116661.9	chr1 | -	IR	11709584:11709931-11709931:11710022-11710022:11710131	11709584:11710131	0.611	0.1395	1	0.431
ACC	TCGA-OR-A5LB-01A-11R-A29S-07.881f6b71-7088-42c8-bfec-c86943715b56.aligned		intron_retention_8113	FBXO2	ENSG00000116661.9	chr1 | -	IR	11709584:11709931-11709931:11710022-11710022:11710131	11709584:11710131	0.611	0.1395	1	0.431
ACC	TCGA-OR-A5LC-01A-11R-A29S-07.cbe8e9e4-f555-47ce-9905-d9f95637c18a.aligned	0.843	intron_retention_8113	FBXO2	ENSG00000116661.9	chr1 | -	IR	11709584:11709931-11709931:11710022-11710022:11710131	11709584:11710131	0.611	0.1395	1	0.431
ACC	TCGA-OR-A5LE-01A-11R-A29S-07.d5597a19-f3ff-431b-85ba-d2f306fe2fab.aligned		intron_retention_8113	FBXO2	ENSG00000116661.9	chr1 | -	IR	11709584:11709931-11709931:11710022-11710022:11710131	11709584:11710131	0.611	0.1395	1	0.431
ACC	TCGA-OR-A5LH-01A-11R-A29S-07.44c5a1b9-e7e0-41ae-85e2-d1f05915ce3c.aligned	1	intron_retention_8113	FBXO2	ENSG00000116661.9	chr1 | -	IR	11709584:11709931-11709931:11710022-11710022:11710131	11709584:11710131	0.611	0.1395	1	0.431
ACC	TCGA-OR-A5LJ-01A-11R-A29S-07.744e863c-e24e-4eee-b0ee-ee24f2ef7401.aligned	1	intron_retention_8113	FBXO2	ENSG00000116661.9	chr1 | -	IR	11709584:11709931-11709931:11710022-11710022:11710131	11709584:11710131	0.611	0.1395	1	0.431
ACC	TCGA-OR-A5LK-01A-11R-A29S-07.6bce4f20-babf-4cbd-a962-6b977986e19d.aligned	0.569	intron_retention_8113	FBXO2	ENSG00000116661.9	chr1 | -	IR	11709584:11709931-11709931:11710022-11710022:11710131	11709584:11710131	0.611	0.1395	1	0.431
ACC	TCGA-OR-A5LL-01A-11R-A29S-07.63f6ab7c-2ef7-42a3-afda-0289383a6976.aligned		intron_retention_8113	FBXO2	ENSG00000116661.9	chr1 | -	IR	11709584:11709931-11709931:11710022-11710022:11710131	11709584:11710131	0.611	0.1395	1	0.431
ACC	TCGA-OR-A5LM-01A-11R-A29S-07.3367029a-3e6f-49ef-8ff5-421aa0c71b4b.aligned	1	intron_retention_8113	FBXO2	ENSG00000116661.9	chr1 | -	IR	11709584:11709931-11709931:11710022-11710022:11710131	11709584:11710131	0.611	0.1395	1	0.431
ACC	TCGA-OR-A5LN-01A-11R-A29S-07.8ab4c4ac-e348-4fa7-b15b-1b640d771fae.aligned	1	intron_retention_8113	FBXO2	ENSG00000116661.9	chr1 | -	IR	11709584:11709931-11709931:11710022-11710022:11710131	11709584:11710131	0.611	0.1395	1	0.431
ACC	TCGA-OR-A5LO-01A-11R-A29S-07.a70e4d3e-993e-4ab7-95b9-1c52f452ef63.aligned		intron_retention_8113	FBXO2	ENSG00000116661.9	chr1 | -	IR	11709584:11709931-11709931:11710022-11710022:11710131	11709584:11710131	0.611	0.1395	1	0.431
ACC	TCGA-OR-A5LP-01A-11R-A29S-07.62428588-d744-40ee-9318-f09c64e95898.aligned	0.636	intron_retention_8113	FBXO2	ENSG00000116661.9	chr1 | -	IR	11709584:11709931-11709931:11710022-11710022:11710131	11709584:11710131	0.611	0.1395	1	0.431
ACC	TCGA-OR-A5LR-01A-11R-A29S-07.70b87c96-d585-4260-aa9a-7a5ee37d1b10.aligned	0.765	intron_retention_8113	FBXO2	ENSG00000116661.9	chr1 | -	IR	11709584:11709931-11709931:11710022-11710022:11710131	11709584:11710131	0.611	0.1395	1	0.431
ACC	TCGA-OR-A5LS-01A-11R-A29S-07.67a0828e-86c3-4c46-b05c-104000425669.aligned		intron_retention_8113	FBXO2	ENSG00000116661.9	chr1 | -	IR	11709584:11709931-11709931:11710022-11710022:11710131	11709584:11710131	0.611	0.1395	1	0.431
ACC	TCGA-OR-A5LT-01A-11R-A29S-07.c18bba08-b10a-4237-96a6-5f89efa59826.aligned	0.756	intron_retention_8113	FBXO2	ENSG00000116661.9	chr1 | -	IR	11709584:11709931-11709931:11710022-11710022:11710131	11709584:11710131	0.611	0.1395	1	0.431
ACC	TCGA-OU-A5PI-01A-12R-A29S-07.7d3369ab-b556-45c5-aaaf-e7cd9ac0d454.aligned	0.772	intron_retention_8113	FBXO2	ENSG00000116661.9	chr1 | -	IR	11709584:11709931-11709931:11710022-11710022:11710131	11709584:11710131	0.611	0.1395	1	0.431
ACC	TCGA-P6-A5OF-01A-11R-A29S-07.ca5f547a-8ec9-4436-9878-1f1cab2fa329.aligned	1	intron_retention_8113	FBXO2	ENSG00000116661.9	chr1 | -	IR	11709584:11709931-11709931:11710022-11710022:11710131	11709584:11710131	0.611	0.1395	1	0.431
ACC	TCGA-P6-A5OG-01A-22R-A29S-07.b5a3bdce-d4ad-43a6-8fbc-1e9d31dc2564.aligned		intron_retention_8113	FBXO2	ENSG00000116661.9	chr1 | -	IR	11709584:11709931-11709931:11710022-11710022:11710131	11709584:11710131	0.611	0.1395	1	0.431
ACC	TCGA-PA-A5YG-01A-11R-A29S-07.379e288c-fa30-460c-bb57-d3b6f09b1483.aligned	0.669	intron_retention_8113	FBXO2	ENSG00000116661.9	chr1 | -	IR	11709584:11709931-11709931:11710022-11710022:11710131	11709584:11710131	0.611	0.1395	1	0.431
ACC	TCGA-PK-A5H8-01A-11R-A29S-07.cdb932bf-d02c-4c3c-9e71-22eb12623977.aligned		intron_retention_8113	FBXO2	ENSG00000116661.9	chr1 | -	IR	11709584:11709931-11709931:11710022-11710022:11710131	11709584:11710131	0.611	0.1395	1	0.431
ACC	TCGA-PK-A5H9-01A-11R-A29S-07.207683b6-6a60-44ef-8eb2-d26ed9a7de76.aligned	1	intron_retention_8113	FBXO2	ENSG00000116661.9	chr1 | -	IR	11709584:11709931-11709931:11710022-11710022:11710131	11709584:11710131	0.611	0.1395	1	0.431
ACC	TCGA-PK-A5HA-01A-11R-A29S-07.69d7a879-cf23-44d0-8a44-050b7a3f4b03.aligned	1	intron_retention_8113	FBXO2	ENSG00000116661.9	chr1 | -	IR	11709584:11709931-11709931:11710022-11710022:11710131	11709584:11710131	0.611	0.1395	1	0.431
ACC	TCGA-PK-A5HB-01A-11R-A29S-07.c92f7cf7-f63b-4f04-a391-193f65a6f8a7.aligned		intron_retention_8113	FBXO2	ENSG00000116661.9	chr1 | -	IR	11709584:11709931-11709931:11710022-11710022:11710131	11709584:11710131	0.611	0.1395	1	0.431
GBM	TCGA-02-0047-01A-01R-1849-01.95d8884d-0961-4070-be07-55dce4c7bc8f.aligned	1	intron_retention_8113	FBXO2	ENSG00000116661.9	chr1 | -	IR	11709584:11709931-11709931:11710022-11710022:11710131	11709584:11710131	0.569	0.06	1	0.265
GBM	TCGA-02-0055-01A-01R-1849-01.065048d0-ecbf-4de2-b12a-55e52f8d1279.aligned	0.817	intron_retention_8113	FBXO2	ENSG00000116661.9	chr1 | -	IR	11709584:11709931-11709931:11710022-11710022:11710131	11709584:11710131	0.569	0.06	1	0.265
GBM	TCGA-02-2483-01A-01R-1849-01.35578669-fb40-49fa-b6b5-3bd0f239fa7e.aligned		intron_retention_8113	FBXO2	ENSG00000116661.9	chr1 | -	IR	11709584:11709931-11709931:11710022-11710022:11710131	11709584:11710131	0.569	0.06	1	0.265
GBM	TCGA-02-2485-01A-01R-1849-01.102a0737-7d27-46b8-a433-4f1bb5300858.aligned		intron_retention_8113	FBXO2	ENSG00000116661.9	chr1 | -	IR	11709584:11709931-11709931:11710022-11710022:11710131	11709584:11710131	0.569	0.06	1	0.265
GBM	TCGA-02-2486-01A-01R-1849-01.92972663-4231-4e24-96d1-23857a445e03.aligned	1	intron_retention_8113	FBXO2	ENSG00000116661.9	chr1 | -	IR	11709584:11709931-11709931:11710022-11710022:11710131	11709584:11710131	0.569	0.06	1	0.265
GBM	TCGA-06-0125-01A-01R-1849-01.ea85c76f-5334-495d-9615-d3f503c0d088.aligned	1	intron_retention_8113	FBXO2	ENSG00000116661.9	chr1 | -	IR	11709584:11709931-11709931:11710022-11710022:11710131	11709584:11710131	0.569	0.06	1	0.265
GBM	TCGA-06-0125-02A-11R-2005-01.2e5a4130-bc62-4986-948b-b741b3fbdc7a.aligned	1	intron_retention_8113	FBXO2	ENSG00000116661.9	chr1 | -	IR	11709584:11709931-11709931:11710022-11710022:11710131	11709584:11710131	0.569	0.06	1	0.265
GBM	TCGA-06-0129-01A-01R-1849-01.17c98d8c-8bd4-4b16-a384-0497d730f497.aligned	1	intron_retention_8113	FBXO2	ENSG00000116661.9	chr1 | -	IR	11709584:11709931-11709931:11710022-11710022:11710131	11709584:11710131	0.569	0.06	1	0.265
GBM	TCGA-06-0130-01A-01R-1849-01.cf7e2358-7542-4381-90f4-782663ddc63a.aligned		intron_retention_8113	FBXO2	ENSG00000116661.9	chr1 | -	IR	11709584:11709931-11709931:11710022-11710022:11710131	11709584:11710131	0.569	0.06	1	0.265
GBM	TCGA-06-0132-01A-02R-1849-01.66f6da01-b85b-4e29-8059-0bb6a32d709f.aligned	1	intron_retention_8113	FBXO2	ENSG00000116661.9	chr1 | -	IR	11709584:11709931-11709931:11710022-11710022:11710131	11709584:11710131	0.569	0.06	1	0.265
GBM	TCGA-06-0138-01A-02R-1849-01.6f2fedb4-66e2-48fd-8744-cbd30075bb03.aligned	1	intron_retention_8113	FBXO2	ENSG00000116661.9	chr1 | -	IR	11709584:11709931-11709931:11710022-11710022:11710131	11709584:11710131	0.569	0.06	1	0.265
GBM	TCGA-06-0139-01A-01R-1849-01.0a0d57c8-f137-4ae6-8d36-b8b8e402ccd4.aligned		intron_retention_8113	FBXO2	ENSG00000116661.9	chr1 | -	IR	11709584:11709931-11709931:11710022-11710022:11710131	11709584:11710131	0.569	0.06	1	0.265
GBM	TCGA-06-0141-01A-01R-1849-01.689fb14c-d3c5-414f-8c7a-8aa73ebbfc37.aligned	1	intron_retention_8113	FBXO2	ENSG00000116661.9	chr1 | -	IR	11709584:11709931-11709931:11710022-11710022:11710131	11709584:11710131	0.569	0.06	1	0.265
GBM	TCGA-06-0152-02A-01R-2005-01.75ed138d-252f-4179-b93f-4ae8eb2524ee.aligned	1	intron_retention_8113	FBXO2	ENSG00000116661.9	chr1 | -	IR	11709584:11709931-11709931:11710022-11710022:11710131	11709584:11710131	0.569	0.06	1	0.265
GBM	TCGA-06-0156-01A-02R-1849-01.88958da0-8140-466c-8183-bf4995529b16.aligned		intron_retention_8113	FBXO2	ENSG00000116661.9	chr1 | -	IR	11709584:11709931-11709931:11710022-11710022:11710131	11709584:11710131	0.569	0.06	1	0.265
GBM	TCGA-06-0156-01A-03R-1849-01.67b4bd07-77fd-4595-b2a0-5f3a3a43a221.aligned		intron_retention_8113	FBXO2	ENSG00000116661.9	chr1 | -	IR	11709584:11709931-11709931:11710022-11710022:11710131	11709584:11710131	0.569	0.06	1	0.265
GBM	TCGA-06-0157-01A-01R-1849-01.e50235f8-f8cf-44c8-9d5e-ca5bbbb6291a.aligned		intron_retention_8113	FBXO2	ENSG00000116661.9	chr1 | -	IR	11709584:11709931-11709931:11710022-11710022:11710131	11709584:11710131	0.569	0.06	1	0.265
GBM	TCGA-06-0158-01A-01R-1849-01.4df60632-cb31-4c0f-8929-d18129668469.aligned	0.735	intron_retention_8113	FBXO2	ENSG00000116661.9	chr1 | -	IR	11709584:11709931-11709931:11710022-11710022:11710131	11709584:11710131	0.569	0.06	1	0.265
GBM	TCGA-06-0171-02A-11R-2005-01.01b7a29e-0d3a-4a18-8cb6-f8a329f9d6e6.aligned	1	intron_retention_8113	FBXO2	ENSG00000116661.9	chr1 | -	IR	11709584:11709931-11709931:11710022-11710022:11710131	11709584:11710131	0.569	0.06	1	0.265
GBM	TCGA-06-0174-01A-01R-1849-01.2cd6082b-d5e7-45a1-96f9-8ef4cccf8533.aligned		intron_retention_8113	FBXO2	ENSG00000116661.9	chr1 | -	IR	11709584:11709931-11709931:11710022-11710022:11710131	11709584:11710131	0.569	0.06	1	0.265
GBM	TCGA-06-0178-01A-01R-1849-01.271ec214-e83b-4fcb-85cf-f35f3c39f0aa.aligned	1	intron_retention_8113	FBXO2	ENSG00000116661.9	chr1 | -	IR	11709584:11709931-11709931:11710022-11710022:11710131	11709584:11710131	0.569	0.06	1	0.265
GBM	TCGA-06-0184-01A-01R-1849-01.7522ddf3-0d35-4085-9f94-1ca2e38aa804.aligned	1	intron_retention_8113	FBXO2	ENSG00000116661.9	chr1 | -	IR	11709584:11709931-11709931:11710022-11710022:11710131	11709584:11710131	0.569	0.06	1	0.265
GBM	TCGA-06-0187-01A-01R-1849-01.4e8e7e01-95a7-4724-bbc5-91436d80d0f7.aligned		intron_retention_8113	FBXO2	ENSG00000116661.9	chr1 | -	IR	11709584:11709931-11709931:11710022-11710022:11710131	11709584:11710131	0.569	0.06	1	0.265
GBM	TCGA-06-0190-01A-01R-1849-01.612ef912-5a28-4c11-8703-3376f51afef5.aligned	1	intron_retention_8113	FBXO2	ENSG00000116661.9	chr1 | -	IR	11709584:11709931-11709931:11710022-11710022:11710131	11709584:11710131	0.569	0.06	1	0.265
GBM	TCGA-06-0190-02A-01R-2005-01.0ffc2552-883a-4e8f-9f76-4f37dfce3278.aligned		intron_retention_8113	FBXO2	ENSG00000116661.9	chr1 | -	IR	11709584:11709931-11709931:11710022-11710022:11710131	11709584:11710131	0.569	0.06	1	0.265
GBM	TCGA-06-0210-01A-01R-1849-01.a0dfc338-c576-4a9c-8db3-3bbbcd5dc960.aligned		intron_retention_8113	FBXO2	ENSG00000116661.9	chr1 | -	IR	11709584:11709931-11709931:11710022-11710022:11710131	11709584:11710131	0.569	0.06	1	0.265
GBM	TCGA-06-0210-02A-01R-2005-01.26200b50-c40c-4e09-89c4-083b873bcf25.aligned	1	intron_retention_8113	FBXO2	ENSG00000116661.9	chr1 | -	IR	11709584:11709931-11709931:11710022-11710022:11710131	11709584:11710131	0.569	0.06	1	0.265
GBM	TCGA-06-0211-01A-01R-1849-01.6b59b1e5-4593-49f9-add7-b41e719d7af6.aligned		intron_retention_8113	FBXO2	ENSG00000116661.9	chr1 | -	IR	11709584:11709931-11709931:11710022-11710022:11710131	11709584:11710131	0.569	0.06	1	0.265
GBM	TCGA-06-0211-01B-01R-1849-01.51fff807-cfea-4ff5-bd35-093b0c18f0fb.aligned		intron_retention_8113	FBXO2	ENSG00000116661.9	chr1 | -	IR	11709584:11709931-11709931:11710022-11710022:11710131	11709584:11710131	0.569	0.06	1	0.265
GBM	TCGA-06-0211-02A-02R-2005-01.152afe8c-f67c-4d7c-93ac-e1b7edd56c54.aligned		intron_retention_8113	FBXO2	ENSG00000116661.9	chr1 | -	IR	11709584:11709931-11709931:11710022-11710022:11710131	11709584:11710131	0.569	0.06	1	0.265
GBM	TCGA-06-0219-01A-01R-1849-01.559a1178-052c-4452-876c-ba2468a3160a.aligned	1	intron_retention_8113	FBXO2	ENSG00000116661.9	chr1 | -	IR	11709584:11709931-11709931:11710022-11710022:11710131	11709584:11710131	0.569	0.06	1	0.265
GBM	TCGA-06-0221-02A-11R-2005-01.10c78528-13e4-4ce1-b171-939c9e4492d8.aligned	1	intron_retention_8113	FBXO2	ENSG00000116661.9	chr1 | -	IR	11709584:11709931-11709931:11710022-11710022:11710131	11709584:11710131	0.569	0.06	1	0.265
GBM	TCGA-06-0238-01A-02R-1849-01.a748d693-fae0-4fb6-ab1e-a347b4e9b7d2.aligned	0.884	intron_retention_8113	FBXO2	ENSG00000116661.9	chr1 | -	IR	11709584:11709931-11709931:11710022-11710022:11710131	11709584:11710131	0.569	0.06	1	0.265
GBM	TCGA-06-0644-01A-02R-1849-01.d52e7499-1325-4506-ae20-bd683d37318e.aligned		intron_retention_8113	FBXO2	ENSG00000116661.9	chr1 | -	IR	11709584:11709931-11709931:11710022-11710022:11710131	11709584:11710131	0.569	0.06	1	0.265
GBM	TCGA-06-0645-01A-01R-1849-01.6f9d76f0-ff61-4c58-ab2f-a7c84e9726e9.aligned	1	intron_retention_8113	FBXO2	ENSG00000116661.9	chr1 | -	IR	11709584:11709931-11709931:11710022-11710022:11710131	11709584:11710131	0.569	0.06	1	0.265
GBM	TCGA-06-0646-01A-01R-1849-01.d694ad12-0ae4-4bee-9f7f-0c6adf5bf09d.aligned	1	intron_retention_8113	FBXO2	ENSG00000116661.9	chr1 | -	IR	11709584:11709931-11709931:11710022-11710022:11710131	11709584:11710131	0.569	0.06	1	0.265
GBM	TCGA-06-0649-01B-01R-1849-01.acb1160e-036a-4108-a9ce-d5f954191593.aligned	1	intron_retention_8113	FBXO2	ENSG00000116661.9	chr1 | -	IR	11709584:11709931-11709931:11710022-11710022:11710131	11709584:11710131	0.569	0.06	1	0.265
GBM	TCGA-06-0686-01A-01R-1849-01.f2d1056f-1329-44e4-8269-0e7dde93d64a.aligned		intron_retention_8113	FBXO2	ENSG00000116661.9	chr1 | -	IR	11709584:11709931-11709931:11710022-11710022:11710131	11709584:11710131	0.569	0.06	1	0.265
GBM	TCGA-06-0743-01A-01R-1849-01.61677ea1-64a7-46e3-8b99-784ee9af1ba5.aligned	1	intron_retention_8113	FBXO2	ENSG00000116661.9	chr1 | -	IR	11709584:11709931-11709931:11710022-11710022:11710131	11709584:11710131	0.569	0.06	1	0.265
GBM	TCGA-06-0744-01A-01R-1849-01.d29e5a15-6ad2-41f9-b4e8-5c4b0f3fda9e.aligned		intron_retention_8113	FBXO2	ENSG00000116661.9	chr1 | -	IR	11709584:11709931-11709931:11710022-11710022:11710131	11709584:11710131	0.569	0.06	1	0.265
GBM	TCGA-06-0745-01A-01R-1849-01.616011aa-5aad-4078-85a6-e61f98d83363.aligned	1	intron_retention_8113	FBXO2	ENSG00000116661.9	chr1 | -	IR	11709584:11709931-11709931:11710022-11710022:11710131	11709584:11710131	0.569	0.06	1	0.265
GBM	TCGA-06-0747-01A-01R-1849-01.04e97d81-96bb-40e7-9e8c-1efb19179a62.aligned		intron_retention_8113	FBXO2	ENSG00000116661.9	chr1 | -	IR	11709584:11709931-11709931:11710022-11710022:11710131	11709584:11710131	0.569	0.06	1	0.265
GBM	TCGA-06-0749-01A-01R-1849-01.eb455c55-74ac-4303-b149-475ffe21e3c6.aligned	1	intron_retention_8113	FBXO2	ENSG00000116661.9	chr1 | -	IR	11709584:11709931-11709931:11710022-11710022:11710131	11709584:11710131	0.569	0.06	1	0.265
GBM	TCGA-06-0750-01A-01R-1849-01.47fbba7a-4914-4bcd-9fea-7ebb84fb4b47.aligned	1	intron_retention_8113	FBXO2	ENSG00000116661.9	chr1 | -	IR	11709584:11709931-11709931:11710022-11710022:11710131	11709584:11710131	0.569	0.06	1	0.265
GBM	TCGA-06-0878-01A-01R-1849-01.903d756b-42ba-49bd-9a53-085b3211d8a7.aligned		intron_retention_8113	FBXO2	ENSG00000116661.9	chr1 | -	IR	11709584:11709931-11709931:11710022-11710022:11710131	11709584:11710131	0.569	0.06	1	0.265
GBM	TCGA-06-0882-01A-01R-1849-01.25315562-5f8e-46d0-ab77-d1f6ce75270b.aligned	1	intron_retention_8113	FBXO2	ENSG00000116661.9	chr1 | -	IR	11709584:11709931-11709931:11710022-11710022:11710131	11709584:11710131	0.569	0.06	1	0.265
GBM	TCGA-06-1804-01A-01R-1849-01.07775763-1931-4f95-ad0a-094a228a3770.aligned	0.865	intron_retention_8113	FBXO2	ENSG00000116661.9	chr1 | -	IR	11709584:11709931-11709931:11710022-11710022:11710131	11709584:11710131	0.569	0.06	1	0.265
GBM	TCGA-06-2557-01A-01R-1849-01.84d56a0b-6ee1-4fe7-9491-d8815af1d6f5.aligned	1	intron_retention_8113	FBXO2	ENSG00000116661.9	chr1 | -	IR	11709584:11709931-11709931:11710022-11710022:11710131	11709584:11710131	0.569	0.06	1	0.265
GBM	TCGA-06-2558-01A-01R-1849-01.8fdc3c56-a96b-4cad-983a-12e6ef373069.aligned	1	intron_retention_8113	FBXO2	ENSG00000116661.9	chr1 | -	IR	11709584:11709931-11709931:11710022-11710022:11710131	11709584:11710131	0.569	0.06	1	0.265
GBM	TCGA-06-2559-01A-01R-1849-01.e623cbaa-d406-4c82-b9e8-21acfc9e630a.aligned		intron_retention_8113	FBXO2	ENSG00000116661.9	chr1 | -	IR	11709584:11709931-11709931:11710022-11710022:11710131	11709584:11710131	0.569	0.06	1	0.265
GBM	TCGA-06-2561-01A-02R-1849-01.ec85fbac-e181-4559-b601-d2efe44e37a8.aligned	0.839	intron_retention_8113	FBXO2	ENSG00000116661.9	chr1 | -	IR	11709584:11709931-11709931:11710022-11710022:11710131	11709584:11710131	0.569	0.06	1	0.265
GBM	TCGA-06-2562-01A-01R-1849-01.497767ca-3148-46d2-b4fc-15530c678b0b.aligned	1	intron_retention_8113	FBXO2	ENSG00000116661.9	chr1 | -	IR	11709584:11709931-11709931:11710022-11710022:11710131	11709584:11710131	0.569	0.06	1	0.265
GBM	TCGA-06-2563-01A-01R-1849-01.c893538c-d12c-4dd1-a3fd-cba6a847c14e.aligned		intron_retention_8113	FBXO2	ENSG00000116661.9	chr1 | -	IR	11709584:11709931-11709931:11710022-11710022:11710131	11709584:11710131	0.569	0.06	1	0.265
GBM	TCGA-06-2564-01A-01R-1849-01.6245a56e-eec6-4e7b-b9ef-bf0d1a3dcf36.aligned		intron_retention_8113	FBXO2	ENSG00000116661.9	chr1 | -	IR	11709584:11709931-11709931:11710022-11710022:11710131	11709584:11710131	0.569	0.06	1	0.265
GBM	TCGA-06-2565-01A-01R-1849-01.2ee686c6-da57-4371-90a9-db02ab6cb278.aligned		intron_retention_8113	FBXO2	ENSG00000116661.9	chr1 | -	IR	11709584:11709931-11709931:11710022-11710022:11710131	11709584:11710131	0.569	0.06	1	0.265
GBM	TCGA-06-2567-01A-01R-1849-01.e99614f9-51d8-4096-83af-8effd5266881.aligned	1	intron_retention_8113	FBXO2	ENSG00000116661.9	chr1 | -	IR	11709584:11709931-11709931:11710022-11710022:11710131	11709584:11710131	0.569	0.06	1	0.265
GBM	TCGA-06-2569-01A-01R-1849-01.57e8e300-2cd1-4af1-a84c-02e1d3fc3555.aligned		intron_retention_8113	FBXO2	ENSG00000116661.9	chr1 | -	IR	11709584:11709931-11709931:11710022-11710022:11710131	11709584:11710131	0.569	0.06	1	0.265
GBM	TCGA-06-2570-01A-01R-1849-01.48724ea4-25f1-463c-883a-69897e7d9a41.aligned	1	intron_retention_8113	FBXO2	ENSG00000116661.9	chr1 | -	IR	11709584:11709931-11709931:11710022-11710022:11710131	11709584:11710131	0.569	0.06	1	0.265
GBM	TCGA-06-5408-01A-01R-1849-01.37218c7d-74ed-43db-9556-a09006645998.aligned	1	intron_retention_8113	FBXO2	ENSG00000116661.9	chr1 | -	IR	11709584:11709931-11709931:11710022-11710022:11710131	11709584:11710131	0.569	0.06	1	0.265
GBM	TCGA-06-5410-01A-01R-1849-01.39580733-5ff1-43a1-b9fd-53b6f6e879bd.aligned	1	intron_retention_8113	FBXO2	ENSG00000116661.9	chr1 | -	IR	11709584:11709931-11709931:11710022-11710022:11710131	11709584:11710131	0.569	0.06	1	0.265
GBM	TCGA-06-5411-01A-01R-1849-01.98937e70-6d2c-4057-b5ef-e01d0006486f.aligned	0.903	intron_retention_8113	FBXO2	ENSG00000116661.9	chr1 | -	IR	11709584:11709931-11709931:11710022-11710022:11710131	11709584:11710131	0.569	0.06	1	0.265
GBM	TCGA-06-5412-01A-01R-1849-01.d39f75a1-3216-4f0a-86d2-0055feced3dd.aligned		intron_retention_8113	FBXO2	ENSG00000116661.9	chr1 | -	IR	11709584:11709931-11709931:11710022-11710022:11710131	11709584:11710131	0.569	0.06	1	0.265
GBM	TCGA-06-5413-01A-01R-1849-01.48f886d5-bb04-4fd1-809c-4b85730c4208.aligned	1	intron_retention_8113	FBXO2	ENSG00000116661.9	chr1 | -	IR	11709584:11709931-11709931:11710022-11710022:11710131	11709584:11710131	0.569	0.06	1	0.265
GBM	TCGA-06-5414-01A-01R-1849-01.051cda00-0007-4e35-9044-fd0c03c8ed4b.aligned		intron_retention_8113	FBXO2	ENSG00000116661.9	chr1 | -	IR	11709584:11709931-11709931:11710022-11710022:11710131	11709584:11710131	0.569	0.06	1	0.265
GBM	TCGA-06-5416-01A-01R-1849-01.69336246-eb91-424b-9cd2-8cbdcf7adfe7.aligned	1	intron_retention_8113	FBXO2	ENSG00000116661.9	chr1 | -	IR	11709584:11709931-11709931:11710022-11710022:11710131	11709584:11710131	0.569	0.06	1	0.265
GBM	TCGA-06-5418-01A-01R-1849-01.e48c8261-5e7b-4cbe-95ed-8a7d1c356d70.aligned		intron_retention_8113	FBXO2	ENSG00000116661.9	chr1 | -	IR	11709584:11709931-11709931:11710022-11710022:11710131	11709584:11710131	0.569	0.06	1	0.265
GBM	TCGA-06-5856-01A-01R-1849-01.748dc9ed-758b-43c9-af66-111f6ab3d6ce.aligned		intron_retention_8113	FBXO2	ENSG00000116661.9	chr1 | -	IR	11709584:11709931-11709931:11710022-11710022:11710131	11709584:11710131	0.569	0.06	1	0.265
GBM	TCGA-06-5858-01A-01R-1849-01.67068dc6-6270-4e7b-a857-3008dadc2d59.aligned		intron_retention_8113	FBXO2	ENSG00000116661.9	chr1 | -	IR	11709584:11709931-11709931:11710022-11710022:11710131	11709584:11710131	0.569	0.06	1	0.265
GBM	TCGA-06-5859-01A-01R-1849-01.76ad0a38-a2a2-4533-8baf-5f94c0c59a02.aligned	1	intron_retention_8113	FBXO2	ENSG00000116661.9	chr1 | -	IR	11709584:11709931-11709931:11710022-11710022:11710131	11709584:11710131	0.569	0.06	1	0.265
GBM	TCGA-08-0386-01A-01R-1849-01.49516e85-eebe-491b-90eb-c76e4425f130.aligned		intron_retention_8113	FBXO2	ENSG00000116661.9	chr1 | -	IR	11709584:11709931-11709931:11710022-11710022:11710131	11709584:11710131	0.569	0.06	1	0.265
GBM	TCGA-12-0616-01A-01R-1849-01.23c2c2d5-d035-4875-a109-aa0a4c34c20e.aligned		intron_retention_8113	FBXO2	ENSG00000116661.9	chr1 | -	IR	11709584:11709931-11709931:11710022-11710022:11710131	11709584:11710131	0.569	0.06	1	0.265
GBM	TCGA-12-0618-01A-01R-1849-01.df36c4af-258e-4cfb-9550-d3580d097547.aligned	1	intron_retention_8113	FBXO2	ENSG00000116661.9	chr1 | -	IR	11709584:11709931-11709931:11710022-11710022:11710131	11709584:11710131	0.569	0.06	1	0.265
GBM	TCGA-12-0619-01A-01R-1849-01.d1431a36-5c68-4e6e-9aea-72afe374efd1.aligned		intron_retention_8113	FBXO2	ENSG00000116661.9	chr1 | -	IR	11709584:11709931-11709931:11710022-11710022:11710131	11709584:11710131	0.569	0.06	1	0.265
GBM	TCGA-12-0821-01A-01R-1849-01.e454530c-3b94-444c-bd1a-682b6048aa94.aligned	1	intron_retention_8113	FBXO2	ENSG00000116661.9	chr1 | -	IR	11709584:11709931-11709931:11710022-11710022:11710131	11709584:11710131	0.569	0.06	1	0.265
GBM	TCGA-12-1597-01B-01R-1849-01.6f54bcd2-99e9-4f9b-a9b8-6963b922f783.aligned	1	intron_retention_8113	FBXO2	ENSG00000116661.9	chr1 | -	IR	11709584:11709931-11709931:11710022-11710022:11710131	11709584:11710131	0.569	0.06	1	0.265
GBM	TCGA-12-3650-01A-01R-1849-01.5522993c-6439-483c-97a6-843026d5198b.aligned	1	intron_retention_8113	FBXO2	ENSG00000116661.9	chr1 | -	IR	11709584:11709931-11709931:11710022-11710022:11710131	11709584:11710131	0.569	0.06	1	0.265
GBM	TCGA-12-3652-01A-01R-1849-01.125927b5-24fd-4910-8b21-6fe37adb8a7c.aligned		intron_retention_8113	FBXO2	ENSG00000116661.9	chr1 | -	IR	11709584:11709931-11709931:11710022-11710022:11710131	11709584:11710131	0.569	0.06	1	0.265
GBM	TCGA-12-3653-01A-01R-1849-01.82d0310c-7bd8-422e-97a7-7e73be8d8a30.aligned		intron_retention_8113	FBXO2	ENSG00000116661.9	chr1 | -	IR	11709584:11709931-11709931:11710022-11710022:11710131	11709584:11710131	0.569	0.06	1	0.265
GBM	TCGA-12-5295-01A-01R-1849-01.9f591278-eec9-422f-9b78-77f65fa84f18.aligned		intron_retention_8113	FBXO2	ENSG00000116661.9	chr1 | -	IR	11709584:11709931-11709931:11710022-11710022:11710131	11709584:11710131	0.569	0.06	1	0.265
GBM	TCGA-12-5299-01A-02R-1849-01.f4d31bec-0bf5-4f59-ae0e-37170f1b692e.aligned	1	intron_retention_8113	FBXO2	ENSG00000116661.9	chr1 | -	IR	11709584:11709931-11709931:11710022-11710022:11710131	11709584:11710131	0.569	0.06	1	0.265
GBM	TCGA-14-0736-02A-01R-2005-01.b469eb7c-723f-4870-b4e4-ebfaae7a118b.aligned	1	intron_retention_8113	FBXO2	ENSG00000116661.9	chr1 | -	IR	11709584:11709931-11709931:11710022-11710022:11710131	11709584:11710131	0.569	0.06	1	0.265
GBM	TCGA-14-0781-01B-01R-1849-01.66b268a8-8652-4efc-8b2e-cf4ac6e00516.aligned	1	intron_retention_8113	FBXO2	ENSG00000116661.9	chr1 | -	IR	11709584:11709931-11709931:11710022-11710022:11710131	11709584:11710131	0.569	0.06	1	0.265
GBM	TCGA-14-0787-01A-01R-1849-01.a77fc356-53b6-4932-a369-4bb7b89f8ed2.aligned		intron_retention_8113	FBXO2	ENSG00000116661.9	chr1 | -	IR	11709584:11709931-11709931:11710022-11710022:11710131	11709584:11710131	0.569	0.06	1	0.265
GBM	TCGA-14-0789-01A-01R-1849-01.48a2ae8d-a9c4-4d06-8619-ad49502b3721.aligned		intron_retention_8113	FBXO2	ENSG00000116661.9	chr1 | -	IR	11709584:11709931-11709931:11710022-11710022:11710131	11709584:11710131	0.569	0.06	1	0.265
GBM	TCGA-14-0790-01B-01R-1849-01.68de1b36-afde-4fb9-bd5a-38037cd7df11.aligned		intron_retention_8113	FBXO2	ENSG00000116661.9	chr1 | -	IR	11709584:11709931-11709931:11710022-11710022:11710131	11709584:11710131	0.569	0.06	1	0.265
GBM	TCGA-14-0817-01A-01R-1849-01.60003a9d-4fed-4131-839d-13d72f6d9c28.aligned	1	intron_retention_8113	FBXO2	ENSG00000116661.9	chr1 | -	IR	11709584:11709931-11709931:11710022-11710022:11710131	11709584:11710131	0.569	0.06	1	0.265
GBM	TCGA-14-0871-01A-01R-1849-01.4bd8bbae-7370-43c7-89cb-0fe0028553dd.aligned		intron_retention_8113	FBXO2	ENSG00000116661.9	chr1 | -	IR	11709584:11709931-11709931:11710022-11710022:11710131	11709584:11710131	0.569	0.06	1	0.265
GBM	TCGA-14-1034-01A-01R-1849-01.28239a0e-9990-49ef-a159-ba63fb078c77.aligned		intron_retention_8113	FBXO2	ENSG00000116661.9	chr1 | -	IR	11709584:11709931-11709931:11710022-11710022:11710131	11709584:11710131	0.569	0.06	1	0.265
GBM	TCGA-14-1034-02B-01R-2005-01.ee783da8-98c4-4107-8e9b-af8580ac2f24.aligned		intron_retention_8113	FBXO2	ENSG00000116661.9	chr1 | -	IR	11709584:11709931-11709931:11710022-11710022:11710131	11709584:11710131	0.569	0.06	1	0.265
GBM	TCGA-14-1402-02A-01R-2005-01.d8164b02-4b3c-454d-945b-2838edb1b5b1.aligned		intron_retention_8113	FBXO2	ENSG00000116661.9	chr1 | -	IR	11709584:11709931-11709931:11710022-11710022:11710131	11709584:11710131	0.569	0.06	1	0.265
GBM	TCGA-14-1823-01A-01R-1849-01.addc558d-d718-4f50-a0dc-92f7c3341f61.aligned		intron_retention_8113	FBXO2	ENSG00000116661.9	chr1 | -	IR	11709584:11709931-11709931:11710022-11710022:11710131	11709584:11710131	0.569	0.06	1	0.265
GBM	TCGA-14-1825-01A-01R-1850-01.33daf82d-0b4d-474e-84d7-f21c47077c95.aligned		intron_retention_8113	FBXO2	ENSG00000116661.9	chr1 | -	IR	11709584:11709931-11709931:11710022-11710022:11710131	11709584:11710131	0.569	0.06	1	0.265
GBM	TCGA-14-1829-01A-01R-1850-01.098b8eb6-2e55-4628-8eca-e1068e74d9e6.aligned	1	intron_retention_8113	FBXO2	ENSG00000116661.9	chr1 | -	IR	11709584:11709931-11709931:11710022-11710022:11710131	11709584:11710131	0.569	0.06	1	0.265
GBM	TCGA-14-2554-01A-01R-1850-01.fbf2f1c0-fb91-4548-8653-68021e6541f9.aligned		intron_retention_8113	FBXO2	ENSG00000116661.9	chr1 | -	IR	11709584:11709931-11709931:11710022-11710022:11710131	11709584:11710131	0.569	0.06	1	0.265
GBM	TCGA-15-0742-01A-01R-1850-01.3721666c-f46f-4b43-9f5d-b3cf85af176c.aligned		intron_retention_8113	FBXO2	ENSG00000116661.9	chr1 | -	IR	11709584:11709931-11709931:11710022-11710022:11710131	11709584:11710131	0.569	0.06	1	0.265
GBM	TCGA-15-1444-01A-02R-1850-01.95e1423d-5a12-49cf-841d-1521593a874f.aligned	1	intron_retention_8113	FBXO2	ENSG00000116661.9	chr1 | -	IR	11709584:11709931-11709931:11710022-11710022:11710131	11709584:11710131	0.569	0.06	1	0.265
GBM	TCGA-16-0846-01A-01R-1850-01.8dd4d862-180f-479b-8d87-0eaae4fc9236.aligned	1	intron_retention_8113	FBXO2	ENSG00000116661.9	chr1 | -	IR	11709584:11709931-11709931:11710022-11710022:11710131	11709584:11710131	0.569	0.06	1	0.265
GBM	TCGA-16-1045-01B-01R-1850-01.f4398f60-1a5f-426f-8d4c-ab52d815bb98.aligned	1	intron_retention_8113	FBXO2	ENSG00000116661.9	chr1 | -	IR	11709584:11709931-11709931:11710022-11710022:11710131	11709584:11710131	0.569	0.06	1	0.265
GBM	TCGA-19-0957-02A-11R-2005-01.8401d72d-a286-4541-b566-c6212ef4c89c.aligned	1	intron_retention_8113	FBXO2	ENSG00000116661.9	chr1 | -	IR	11709584:11709931-11709931:11710022-11710022:11710131	11709584:11710131	0.569	0.06	1	0.265
GBM	TCGA-19-1389-02A-21R-2005-01.d722657b-e5b6-4476-94e9-1135ce8aecad.aligned		intron_retention_8113	FBXO2	ENSG00000116661.9	chr1 | -	IR	11709584:11709931-11709931:11710022-11710022:11710131	11709584:11710131	0.569	0.06	1	0.265
GBM	TCGA-19-1390-01A-01R-1850-01.f2a757d2-2574-4840-88ea-5ffd09d0103c.aligned	1	intron_retention_8113	FBXO2	ENSG00000116661.9	chr1 | -	IR	11709584:11709931-11709931:11710022-11710022:11710131	11709584:11710131	0.569	0.06	1	0.265
GBM	TCGA-19-1787-01B-01R-1850-01.5d40c2af-b2e9-407c-be1f-780a9071fbe7.aligned	1	intron_retention_8113	FBXO2	ENSG00000116661.9	chr1 | -	IR	11709584:11709931-11709931:11710022-11710022:11710131	11709584:11710131	0.569	0.06	1	0.265
GBM	TCGA-19-2619-01A-01R-1850-01.adafa15c-5834-427e-bc93-24d3c4f775a9.aligned	1	intron_retention_8113	FBXO2	ENSG00000116661.9	chr1 | -	IR	11709584:11709931-11709931:11710022-11710022:11710131	11709584:11710131	0.569	0.06	1	0.265
GBM	TCGA-19-2620-01A-01R-1850-01.497fcc98-1eeb-4696-88eb-22fc99627695.aligned	1	intron_retention_8113	FBXO2	ENSG00000116661.9	chr1 | -	IR	11709584:11709931-11709931:11710022-11710022:11710131	11709584:11710131	0.569	0.06	1	0.265
GBM	TCGA-19-2624-01A-01R-1850-01.d5a281fd-c004-477f-af62-c55fe20f1dee.aligned	0.784	intron_retention_8113	FBXO2	ENSG00000116661.9	chr1 | -	IR	11709584:11709931-11709931:11710022-11710022:11710131	11709584:11710131	0.569	0.06	1	0.265
GBM	TCGA-19-2625-01A-01R-1850-01.febcf9af-1a79-4234-a095-4efa3c3aa2bc.aligned		intron_retention_8113	FBXO2	ENSG00000116661.9	chr1 | -	IR	11709584:11709931-11709931:11710022-11710022:11710131	11709584:11710131	0.569	0.06	1	0.265
GBM	TCGA-19-2629-01A-01R-1850-01.56a705f4-fd28-44ff-8a3c-85bc4300c760.aligned	1	intron_retention_8113	FBXO2	ENSG00000116661.9	chr1 | -	IR	11709584:11709931-11709931:11710022-11710022:11710131	11709584:11710131	0.569	0.06	1	0.265
GBM	TCGA-19-4065-01A-01R-2005-01.3053a2c5-4426-4d56-85b0-50567f1e81c9.aligned		intron_retention_8113	FBXO2	ENSG00000116661.9	chr1 | -	IR	11709584:11709931-11709931:11710022-11710022:11710131	11709584:11710131	0.569	0.06	1	0.265
GBM	TCGA-19-4065-02A-11R-2005-01.6287ca85-ad7b-4656-9c6e-8c3c44833462.aligned	1	intron_retention_8113	FBXO2	ENSG00000116661.9	chr1 | -	IR	11709584:11709931-11709931:11710022-11710022:11710131	11709584:11710131	0.569	0.06	1	0.265
GBM	TCGA-19-5960-01A-11R-1850-01.c0c714ac-aa74-4702-8c3b-704f6e549276.aligned	1	intron_retention_8113	FBXO2	ENSG00000116661.9	chr1 | -	IR	11709584:11709931-11709931:11710022-11710022:11710131	11709584:11710131	0.569	0.06	1	0.265
GBM	TCGA-26-1442-01A-01R-1850-01.049eb561-95ee-4584-b9eb-0715c80e0a95.aligned	0.736	intron_retention_8113	FBXO2	ENSG00000116661.9	chr1 | -	IR	11709584:11709931-11709931:11710022-11710022:11710131	11709584:11710131	0.569	0.06	1	0.265
GBM	TCGA-26-5132-01A-01R-1850-01.31398055-e000-4ca1-a37d-aac2df5920b4.aligned		intron_retention_8113	FBXO2	ENSG00000116661.9	chr1 | -	IR	11709584:11709931-11709931:11710022-11710022:11710131	11709584:11710131	0.569	0.06	1	0.265
GBM	TCGA-26-5133-01A-01R-1850-01.e64a2789-9b0e-41ca-9447-b17d8968f4cd.aligned	1	intron_retention_8113	FBXO2	ENSG00000116661.9	chr1 | -	IR	11709584:11709931-11709931:11710022-11710022:11710131	11709584:11710131	0.569	0.06	1	0.265
GBM	TCGA-26-5134-01A-01R-1850-01.49280503-5136-4c10-8e42-061abbb6fa05.aligned	1	intron_retention_8113	FBXO2	ENSG00000116661.9	chr1 | -	IR	11709584:11709931-11709931:11710022-11710022:11710131	11709584:11710131	0.569	0.06	1	0.265
GBM	TCGA-26-5135-01A-01R-1850-01.cea49633-24f0-48c4-b2d0-fed47d5364e6.aligned	1	intron_retention_8113	FBXO2	ENSG00000116661.9	chr1 | -	IR	11709584:11709931-11709931:11710022-11710022:11710131	11709584:11710131	0.569	0.06	1	0.265
GBM	TCGA-26-5136-01B-01R-1850-01.39b5a7b5-e2ec-442d-94c4-ba938ee79b97.aligned		intron_retention_8113	FBXO2	ENSG00000116661.9	chr1 | -	IR	11709584:11709931-11709931:11710022-11710022:11710131	11709584:11710131	0.569	0.06	1	0.265
GBM	TCGA-26-5139-01A-01R-1850-01.10bfa2d8-228f-43d8-ae15-1f58c25d1be3.aligned	0.924	intron_retention_8113	FBXO2	ENSG00000116661.9	chr1 | -	IR	11709584:11709931-11709931:11710022-11710022:11710131	11709584:11710131	0.569	0.06	1	0.265
GBM	TCGA-27-1830-01A-01R-1850-01.f2ab5972-46e6-4d13-bf8e-dffc1dc8a9e9.aligned		intron_retention_8113	FBXO2	ENSG00000116661.9	chr1 | -	IR	11709584:11709931-11709931:11710022-11710022:11710131	11709584:11710131	0.569	0.06	1	0.265
GBM	TCGA-27-1831-01A-01R-1850-01.d577af6d-d9f1-435d-8429-73b5c5962238.aligned		intron_retention_8113	FBXO2	ENSG00000116661.9	chr1 | -	IR	11709584:11709931-11709931:11710022-11710022:11710131	11709584:11710131	0.569	0.06	1	0.265
GBM	TCGA-27-1832-01A-01R-1850-01.11a0e909-11e7-40f3-be04-5bd2143ee6ab.aligned	1	intron_retention_8113	FBXO2	ENSG00000116661.9	chr1 | -	IR	11709584:11709931-11709931:11710022-11710022:11710131	11709584:11710131	0.569	0.06	1	0.265
GBM	TCGA-27-1834-01A-01R-1850-01.5f19c351-94d4-4164-aa7e-4a0f44640cbb.aligned	1	intron_retention_8113	FBXO2	ENSG00000116661.9	chr1 | -	IR	11709584:11709931-11709931:11710022-11710022:11710131	11709584:11710131	0.569	0.06	1	0.265
GBM	TCGA-27-1835-01A-01R-1850-01.5cb5c8ef-740d-4f9d-b081-107a3e4390f6.aligned		intron_retention_8113	FBXO2	ENSG00000116661.9	chr1 | -	IR	11709584:11709931-11709931:11710022-11710022:11710131	11709584:11710131	0.569	0.06	1	0.265
GBM	TCGA-27-1837-01A-01R-1850-01.6a85fda0-3e2d-4bd8-ba44-5ce821c39504.aligned		intron_retention_8113	FBXO2	ENSG00000116661.9	chr1 | -	IR	11709584:11709931-11709931:11710022-11710022:11710131	11709584:11710131	0.569	0.06	1	0.265
GBM	TCGA-27-2519-01A-01R-1850-01.6870c515-1f0e-4481-82bf-7cde66292278.aligned		intron_retention_8113	FBXO2	ENSG00000116661.9	chr1 | -	IR	11709584:11709931-11709931:11710022-11710022:11710131	11709584:11710131	0.569	0.06	1	0.265
GBM	TCGA-27-2521-01A-01R-1850-01.9afb2af1-ea34-41ad-8a5d-5f24df2aba0b.aligned		intron_retention_8113	FBXO2	ENSG00000116661.9	chr1 | -	IR	11709584:11709931-11709931:11710022-11710022:11710131	11709584:11710131	0.569	0.06	1	0.265
GBM	TCGA-27-2523-01A-01R-1850-01.b337121c-9821-4644-820e-b8c477f6c38a.aligned		intron_retention_8113	FBXO2	ENSG00000116661.9	chr1 | -	IR	11709584:11709931-11709931:11710022-11710022:11710131	11709584:11710131	0.569	0.06	1	0.265
GBM	TCGA-27-2524-01A-01R-1850-01.8604df30-9170-41e2-8dfb-2feb813807ac.aligned	1	intron_retention_8113	FBXO2	ENSG00000116661.9	chr1 | -	IR	11709584:11709931-11709931:11710022-11710022:11710131	11709584:11710131	0.569	0.06	1	0.265
GBM	TCGA-27-2526-01A-01R-1850-01.f026a95f-89a7-464f-a8f2-ea036fe1774f.aligned		intron_retention_8113	FBXO2	ENSG00000116661.9	chr1 | -	IR	11709584:11709931-11709931:11710022-11710022:11710131	11709584:11710131	0.569	0.06	1	0.265
GBM	TCGA-27-2528-01A-01R-1850-01.2de8f5dd-decd-47f4-856a-bda678ee6ab8.aligned		intron_retention_8113	FBXO2	ENSG00000116661.9	chr1 | -	IR	11709584:11709931-11709931:11710022-11710022:11710131	11709584:11710131	0.569	0.06	1	0.265
GBM	TCGA-28-1747-01C-01R-1850-01.06fcbf45-4b5a-4c5a-976e-9b7bf57479dd.aligned	1	intron_retention_8113	FBXO2	ENSG00000116661.9	chr1 | -	IR	11709584:11709931-11709931:11710022-11710022:11710131	11709584:11710131	0.569	0.06	1	0.265
GBM	TCGA-28-1753-01A-01R-1850-01.23b23702-8e0f-4b4c-ad92-ce7ea44939e6.aligned	1	intron_retention_8113	FBXO2	ENSG00000116661.9	chr1 | -	IR	11709584:11709931-11709931:11710022-11710022:11710131	11709584:11710131	0.569	0.06	1	0.265
GBM	TCGA-28-2499-01A-01R-1850-01.1dd740dc-2752-4511-ac12-45766c8e2737.aligned	1	intron_retention_8113	FBXO2	ENSG00000116661.9	chr1 | -	IR	11709584:11709931-11709931:11710022-11710022:11710131	11709584:11710131	0.569	0.06	1	0.265
GBM	TCGA-28-2509-01A-01R-1850-01.0cbec58e-f95e-4c60-a85d-210dc56bdf3c.aligned		intron_retention_8113	FBXO2	ENSG00000116661.9	chr1 | -	IR	11709584:11709931-11709931:11710022-11710022:11710131	11709584:11710131	0.569	0.06	1	0.265
GBM	TCGA-28-2510-01A-01R-1850-01.8880d24b-a72e-4472-8d14-19e58e0a61ae.aligned	0.859	intron_retention_8113	FBXO2	ENSG00000116661.9	chr1 | -	IR	11709584:11709931-11709931:11710022-11710022:11710131	11709584:11710131	0.569	0.06	1	0.265
GBM	TCGA-28-2513-01A-01R-1850-01.9b9ba1cf-67be-4d74-90c5-fd86f4a5317f.aligned	1	intron_retention_8113	FBXO2	ENSG00000116661.9	chr1 | -	IR	11709584:11709931-11709931:11710022-11710022:11710131	11709584:11710131	0.569	0.06	1	0.265
GBM	TCGA-28-2514-01A-02R-1850-01.94985059-d992-4f1f-ae67-36cf287f443d.aligned	0.973	intron_retention_8113	FBXO2	ENSG00000116661.9	chr1 | -	IR	11709584:11709931-11709931:11710022-11710022:11710131	11709584:11710131	0.569	0.06	1	0.265
GBM	TCGA-28-5204-01A-01R-1850-01.6f987110-3dbf-4f06-952a-e1aea4b81b44.aligned		intron_retention_8113	FBXO2	ENSG00000116661.9	chr1 | -	IR	11709584:11709931-11709931:11710022-11710022:11710131	11709584:11710131	0.569	0.06	1	0.265
GBM	TCGA-28-5207-01A-01R-1850-01.6251a0df-d7ff-4a1b-9aa6-7d12ea04bd2c.aligned	1	intron_retention_8113	FBXO2	ENSG00000116661.9	chr1 | -	IR	11709584:11709931-11709931:11710022-11710022:11710131	11709584:11710131	0.569	0.06	1	0.265
GBM	TCGA-28-5208-01A-01R-1850-01.63f989ff-890b-4db8-973f-ab675912635f.aligned		intron_retention_8113	FBXO2	ENSG00000116661.9	chr1 | -	IR	11709584:11709931-11709931:11710022-11710022:11710131	11709584:11710131	0.569	0.06	1	0.265
GBM	TCGA-28-5209-01A-01R-1850-01.7a904020-5345-4d1f-8493-8dd07d45faa3.aligned		intron_retention_8113	FBXO2	ENSG00000116661.9	chr1 | -	IR	11709584:11709931-11709931:11710022-11710022:11710131	11709584:11710131	0.569	0.06	1	0.265
GBM	TCGA-28-5213-01A-01R-1850-01.ff4d089b-8f65-46f1-b3bc-dab1271725fb.aligned		intron_retention_8113	FBXO2	ENSG00000116661.9	chr1 | -	IR	11709584:11709931-11709931:11710022-11710022:11710131	11709584:11710131	0.569	0.06	1	0.265
GBM	TCGA-28-5215-01A-01R-1850-01.05a2eea8-f366-4ae7-80f3-03324fb6e66e.aligned	1	intron_retention_8113	FBXO2	ENSG00000116661.9	chr1 | -	IR	11709584:11709931-11709931:11710022-11710022:11710131	11709584:11710131	0.569	0.06	1	0.265
GBM	TCGA-28-5216-01A-01R-1850-01.570d3a26-6bcf-4442-aba9-95a01e84aa16.aligned	1	intron_retention_8113	FBXO2	ENSG00000116661.9	chr1 | -	IR	11709584:11709931-11709931:11710022-11710022:11710131	11709584:11710131	0.569	0.06	1	0.265
GBM	TCGA-28-5218-01A-01R-1850-01.9146c99d-fa73-433d-8460-f2587ce674bb.aligned		intron_retention_8113	FBXO2	ENSG00000116661.9	chr1 | -	IR	11709584:11709931-11709931:11710022-11710022:11710131	11709584:11710131	0.569	0.06	1	0.265
GBM	TCGA-28-5220-01A-01R-1850-01.2d1481b0-3bdd-4b9e-b1e1-813d0c624c25.aligned	0.838	intron_retention_8113	FBXO2	ENSG00000116661.9	chr1 | -	IR	11709584:11709931-11709931:11710022-11710022:11710131	11709584:11710131	0.569	0.06	1	0.265
GBM	TCGA-32-1970-01A-01R-1850-01.a344de7b-5980-4612-9d58-1c8058a2bfd9.aligned	1	intron_retention_8113	FBXO2	ENSG00000116661.9	chr1 | -	IR	11709584:11709931-11709931:11710022-11710022:11710131	11709584:11710131	0.569	0.06	1	0.265
GBM	TCGA-32-1980-01A-01R-1850-01.ebe88950-c783-4487-9bfc-ccaaeacf256c.aligned	1	intron_retention_8113	FBXO2	ENSG00000116661.9	chr1 | -	IR	11709584:11709931-11709931:11710022-11710022:11710131	11709584:11710131	0.569	0.06	1	0.265
GBM	TCGA-32-1982-01A-01R-1850-01.3a5d8c95-260e-471a-bdf8-2fa489a069d8.aligned		intron_retention_8113	FBXO2	ENSG00000116661.9	chr1 | -	IR	11709584:11709931-11709931:11710022-11710022:11710131	11709584:11710131	0.569	0.06	1	0.265
GBM	TCGA-32-2615-01A-01R-1850-01.2db5af77-d0af-4c3c-bd2a-779e0a7228e0.aligned	1	intron_retention_8113	FBXO2	ENSG00000116661.9	chr1 | -	IR	11709584:11709931-11709931:11710022-11710022:11710131	11709584:11710131	0.569	0.06	1	0.265
GBM	TCGA-32-2616-01A-01R-1850-01.6ced4dca-5999-4063-90e9-6ba1851ab054.aligned		intron_retention_8113	FBXO2	ENSG00000116661.9	chr1 | -	IR	11709584:11709931-11709931:11710022-11710022:11710131	11709584:11710131	0.569	0.06	1	0.265
GBM	TCGA-32-2632-01A-01R-1850-01.2b467bcc-e33f-4209-92c0-dcff843027ea.aligned	0.845	intron_retention_8113	FBXO2	ENSG00000116661.9	chr1 | -	IR	11709584:11709931-11709931:11710022-11710022:11710131	11709584:11710131	0.569	0.06	1	0.265
GBM	TCGA-32-2634-01A-01R-1850-01.ecd3ecba-4d25-4995-91df-e076f0cbe2bc.aligned	1	intron_retention_8113	FBXO2	ENSG00000116661.9	chr1 | -	IR	11709584:11709931-11709931:11710022-11710022:11710131	11709584:11710131	0.569	0.06	1	0.265
GBM	TCGA-32-2638-01A-01R-1850-01.eab1e09d-1ca3-484d-95d8-9fd5fa857f3d.aligned	1	intron_retention_8113	FBXO2	ENSG00000116661.9	chr1 | -	IR	11709584:11709931-11709931:11710022-11710022:11710131	11709584:11710131	0.569	0.06	1	0.265
GBM	TCGA-32-4213-01A-01R-1850-01.c6d836ec-710d-4559-ba66-2715f6a55d4c.aligned		intron_retention_8113	FBXO2	ENSG00000116661.9	chr1 | -	IR	11709584:11709931-11709931:11710022-11710022:11710131	11709584:11710131	0.569	0.06	1	0.265
GBM	TCGA-32-5222-01A-01R-1850-01.f5fffae0-0fbe-40f8-93d7-525407048620.aligned	1	intron_retention_8113	FBXO2	ENSG00000116661.9	chr1 | -	IR	11709584:11709931-11709931:11710022-11710022:11710131	11709584:11710131	0.569	0.06	1	0.265
GBM	TCGA-41-2571-01A-01R-1850-01.a7433808-7fb3-4909-92ae-2d74b32886b0.aligned	1	intron_retention_8113	FBXO2	ENSG00000116661.9	chr1 | -	IR	11709584:11709931-11709931:11710022-11710022:11710131	11709584:11710131	0.569	0.06	1	0.265
GBM	TCGA-41-2572-01A-01R-1850-01.f46e05f2-56b9-4a31-b0ec-882414a7aaf6.aligned	1	intron_retention_8113	FBXO2	ENSG00000116661.9	chr1 | -	IR	11709584:11709931-11709931:11710022-11710022:11710131	11709584:11710131	0.569	0.06	1	0.265
GBM	TCGA-41-3915-01A-01R-1850-01.da360144-ffaf-4f38-bd87-96319fa8d2d4.aligned	1	intron_retention_8113	FBXO2	ENSG00000116661.9	chr1 | -	IR	11709584:11709931-11709931:11710022-11710022:11710131	11709584:11710131	0.569	0.06	1	0.265
GBM	TCGA-41-4097-01A-01R-1850-01.4d2bc147-bed8-4621-be86-f32559f0ed91.aligned	1	intron_retention_8113	FBXO2	ENSG00000116661.9	chr1 | -	IR	11709584:11709931-11709931:11710022-11710022:11710131	11709584:11710131	0.569	0.06	1	0.265
GBM	TCGA-41-5651-01A-01R-1850-01.4aa70762-1a0e-4b38-be77-a89db0955193.aligned	1	intron_retention_8113	FBXO2	ENSG00000116661.9	chr1 | -	IR	11709584:11709931-11709931:11710022-11710022:11710131	11709584:11710131	0.569	0.06	1	0.265
GBM	TCGA-76-4925-01A-01R-1850-01.03422479-a670-44ed-a9f7-33f4554ef6f6.aligned		intron_retention_8113	FBXO2	ENSG00000116661.9	chr1 | -	IR	11709584:11709931-11709931:11710022-11710022:11710131	11709584:11710131	0.569	0.06	1	0.265
GBM	TCGA-76-4926-01B-01R-1850-01.110100d2-bfb8-42d2-875f-9424a8bd2086.aligned	1	intron_retention_8113	FBXO2	ENSG00000116661.9	chr1 | -	IR	11709584:11709931-11709931:11710022-11710022:11710131	11709584:11710131	0.569	0.06	1	0.265
GBM	TCGA-76-4927-01A-01R-1850-01.777c1ad8-ae6d-4c17-ad59-8b26adb67a1b.aligned	0.849	intron_retention_8113	FBXO2	ENSG00000116661.9	chr1 | -	IR	11709584:11709931-11709931:11710022-11710022:11710131	11709584:11710131	0.569	0.06	1	0.265
GBM	TCGA-76-4928-01B-01R-1850-01.ca6d5ed3-f6f7-4dde-be24-7652d7dfab16.aligned		intron_retention_8113	FBXO2	ENSG00000116661.9	chr1 | -	IR	11709584:11709931-11709931:11710022-11710022:11710131	11709584:11710131	0.569	0.06	1	0.265
GBM	TCGA-76-4929-01A-01R-1850-01.faadb03e-20bc-4308-a86b-2bdb6aad8a23.aligned	1	intron_retention_8113	FBXO2	ENSG00000116661.9	chr1 | -	IR	11709584:11709931-11709931:11710022-11710022:11710131	11709584:11710131	0.569	0.06	1	0.265
GBM	TCGA-76-4931-01A-01R-1850-01.ca803595-2792-4d7d-81f6-cce8d96d0119.aligned	0.956	intron_retention_8113	FBXO2	ENSG00000116661.9	chr1 | -	IR	11709584:11709931-11709931:11710022-11710022:11710131	11709584:11710131	0.569	0.06	1	0.265
GBM	TCGA-76-4932-01A-01R-1850-01.ebadf417-08e8-4e89-bc8b-f7a74b0fc781.aligned		intron_retention_8113	FBXO2	ENSG00000116661.9	chr1 | -	IR	11709584:11709931-11709931:11710022-11710022:11710131	11709584:11710131	0.569	0.06	1	0.265
CESC	TCGA-2W-A8YY-01A-11R-A37O-07.3be9f1e8-94ae-476e-b146-38385d130f38.aligned	1	intron_retention_8113	FBXO2	ENSG00000116661.9	chr1 | -	IR	11709584:11709931-11709931:11710022-11710022:11710131	11709584:11710131	0.563	0.1632	1	0.58
CESC	TCGA-4J-AA1J-01A-21R-A38B-07.9d09804a-304a-4f05-af84-af513c97f3ed.aligned	1	intron_retention_8113	FBXO2	ENSG00000116661.9	chr1 | -	IR	11709584:11709931-11709931:11710022-11710022:11710131	11709584:11710131	0.563	0.1632	1	0.58
CESC	TCGA-BI-A0VR-01A-11R-A10U-07.73bf920b-b9dc-4f81-b57a-63ebebccf9cd.aligned	0.663	intron_retention_8113	FBXO2	ENSG00000116661.9	chr1 | -	IR	11709584:11709931-11709931:11710022-11710022:11710131	11709584:11710131	0.563	0.1632	1	0.58
CESC	TCGA-BI-A0VS-01A-11R-A10U-07.a57566b4-dd26-46bd-a00f-82136bc2a9be.aligned		intron_retention_8113	FBXO2	ENSG00000116661.9	chr1 | -	IR	11709584:11709931-11709931:11710022-11710022:11710131	11709584:11710131	0.563	0.1632	1	0.58
CESC	TCGA-BI-A20A-01A-11R-A14Y-07.5015be4c-acad-4536-bb65-59696b168717.aligned	1	intron_retention_8113	FBXO2	ENSG00000116661.9	chr1 | -	IR	11709584:11709931-11709931:11710022-11710022:11710131	11709584:11710131	0.563	0.1632	1	0.58
CESC	TCGA-C5-A0TN-01A-21R-A14Y-07.edd006f4-1914-48b6-84d9-420a09dd82d1.aligned	0.614	intron_retention_8113	FBXO2	ENSG00000116661.9	chr1 | -	IR	11709584:11709931-11709931:11710022-11710022:11710131	11709584:11710131	0.563	0.1632	1	0.58
CESC	TCGA-C5-A1BE-01B-11R-A13Y-07.8b82c786-64be-410a-89bf-d28dc8d7c4e9.aligned		intron_retention_8113	FBXO2	ENSG00000116661.9	chr1 | -	IR	11709584:11709931-11709931:11710022-11710022:11710131	11709584:11710131	0.563	0.1632	1	0.58
CESC	TCGA-C5-A1BF-01B-11R-A13Y-07.5b31fb5f-9321-43d8-9b5f-600e8ba2f6cc.aligned	1	intron_retention_8113	FBXO2	ENSG00000116661.9	chr1 | -	IR	11709584:11709931-11709931:11710022-11710022:11710131	11709584:11710131	0.563	0.1632	1	0.58
CESC	TCGA-C5-A1BI-01B-11R-A13Y-07.cde3fda7-c23f-480b-bc20-ac27bcfe4536.aligned	1	intron_retention_8113	FBXO2	ENSG00000116661.9	chr1 | -	IR	11709584:11709931-11709931:11710022-11710022:11710131	11709584:11710131	0.563	0.1632	1	0.58
CESC	TCGA-C5-A1BJ-01A-11R-A13Y-07.a1d00776-9535-4361-af77-8896e51465fe.aligned	0.669	intron_retention_8113	FBXO2	ENSG00000116661.9	chr1 | -	IR	11709584:11709931-11709931:11710022-11710022:11710131	11709584:11710131	0.563	0.1632	1	0.58
CESC	TCGA-C5-A1BK-01B-11R-A13Y-07.feb35af1-052d-41a6-9e76-f47b610ab956.aligned	1	intron_retention_8113	FBXO2	ENSG00000116661.9	chr1 | -	IR	11709584:11709931-11709931:11710022-11710022:11710131	11709584:11710131	0.563	0.1632	1	0.58
CESC	TCGA-C5-A1BL-01A-11R-A13Y-07.5a7840e4-48ef-4d10-8709-c963b6b4c25a.aligned		intron_retention_8113	FBXO2	ENSG00000116661.9	chr1 | -	IR	11709584:11709931-11709931:11710022-11710022:11710131	11709584:11710131	0.563	0.1632	1	0.58
CESC	TCGA-C5-A1BM-01A-11R-A13Y-07.0bb1946f-bc01-47d8-887f-e63f3a16e32d.aligned	1	intron_retention_8113	FBXO2	ENSG00000116661.9	chr1 | -	IR	11709584:11709931-11709931:11710022-11710022:11710131	11709584:11710131	0.563	0.1632	1	0.58
CESC	TCGA-C5-A1BN-01B-11R-A14Y-07.3f679347-cd3b-4711-aa6c-e5d87fa93052.aligned	1	intron_retention_8113	FBXO2	ENSG00000116661.9	chr1 | -	IR	11709584:11709931-11709931:11710022-11710022:11710131	11709584:11710131	0.563	0.1632	1	0.58
CESC	TCGA-C5-A1BQ-01C-11R-A213-07.ab31f363-93f1-4ef9-a47a-731657fdf534.aligned	0.711	intron_retention_8113	FBXO2	ENSG00000116661.9	chr1 | -	IR	11709584:11709931-11709931:11710022-11710022:11710131	11709584:11710131	0.563	0.1632	1	0.58
CESC	TCGA-C5-A1M5-01A-11R-A13Y-07.f301f3e6-eaec-4d35-b8c0-b0eb6acd2847.aligned		intron_retention_8113	FBXO2	ENSG00000116661.9	chr1 | -	IR	11709584:11709931-11709931:11710022-11710022:11710131	11709584:11710131	0.563	0.1632	1	0.58
CESC	TCGA-C5-A1M6-01A-11R-A13Y-07.c4c15b15-8010-47d8-8c6b-3c6b9dae9716.aligned	1	intron_retention_8113	FBXO2	ENSG00000116661.9	chr1 | -	IR	11709584:11709931-11709931:11710022-11710022:11710131	11709584:11710131	0.563	0.1632	1	0.58
CESC	TCGA-C5-A1M7-01A-11R-A13Y-07.a8717ede-a85b-4133-bafc-48abd7892f71.aligned	1	intron_retention_8113	FBXO2	ENSG00000116661.9	chr1 | -	IR	11709584:11709931-11709931:11710022-11710022:11710131	11709584:11710131	0.563	0.1632	1	0.58
CESC	TCGA-C5-A1M8-01A-21R-A13Y-07.a4de3863-03d5-44b0-b711-87aadcb29008.aligned		intron_retention_8113	FBXO2	ENSG00000116661.9	chr1 | -	IR	11709584:11709931-11709931:11710022-11710022:11710131	11709584:11710131	0.563	0.1632	1	0.58
CESC	TCGA-C5-A1M9-01A-11R-A13Y-07.721c59a5-22b6-4388-a47d-d0108ea2c1aa.aligned		intron_retention_8113	FBXO2	ENSG00000116661.9	chr1 | -	IR	11709584:11709931-11709931:11710022-11710022:11710131	11709584:11710131	0.563	0.1632	1	0.58
CESC	TCGA-C5-A1MH-01A-11R-A14Y-07.7a1f4f51-4bea-4e5f-b59a-02fb223d2965.aligned	1	intron_retention_8113	FBXO2	ENSG00000116661.9	chr1 | -	IR	11709584:11709931-11709931:11710022-11710022:11710131	11709584:11710131	0.563	0.1632	1	0.58
CESC	TCGA-C5-A1MI-01A-11R-A14Y-07.e5452386-f28c-450f-b13b-4b1ef4713fa1.aligned	0.715	intron_retention_8113	FBXO2	ENSG00000116661.9	chr1 | -	IR	11709584:11709931-11709931:11710022-11710022:11710131	11709584:11710131	0.563	0.1632	1	0.58
CESC	TCGA-C5-A1MJ-01A-11R-A14Y-07.45ce60c9-d18f-43a2-b240-8dc7d854cd27.aligned		intron_retention_8113	FBXO2	ENSG00000116661.9	chr1 | -	IR	11709584:11709931-11709931:11710022-11710022:11710131	11709584:11710131	0.563	0.1632	1	0.58
CESC	TCGA-C5-A1MK-01A-11R-A14Y-07.174159b7-d7a4-43d5-8c04-7f62f8d0db14.aligned	1	intron_retention_8113	FBXO2	ENSG00000116661.9	chr1 | -	IR	11709584:11709931-11709931:11710022-11710022:11710131	11709584:11710131	0.563	0.1632	1	0.58
CESC	TCGA-C5-A1ML-01A-11R-A14Y-07.1f870a12-9d70-4fe4-a176-4cbee06c44e6.aligned		intron_retention_8113	FBXO2	ENSG00000116661.9	chr1 | -	IR	11709584:11709931-11709931:11710022-11710022:11710131	11709584:11710131	0.563	0.1632	1	0.58
CESC	TCGA-C5-A1MN-01A-11R-A14Y-07.029c4ec1-b4a1-4aea-a126-aceadb8ab52a.aligned	1	intron_retention_8113	FBXO2	ENSG00000116661.9	chr1 | -	IR	11709584:11709931-11709931:11710022-11710022:11710131	11709584:11710131	0.563	0.1632	1	0.58
CESC	TCGA-C5-A1MP-01A-11R-A14Y-07.a1ff456d-7a22-4200-a429-c2a41e5c3e04.aligned	1	intron_retention_8113	FBXO2	ENSG00000116661.9	chr1 | -	IR	11709584:11709931-11709931:11710022-11710022:11710131	11709584:11710131	0.563	0.1632	1	0.58
CESC	TCGA-C5-A1MQ-01A-11R-A14Y-07.1e7b2ed2-be35-4cce-a613-9c8203c49ebb.aligned	1	intron_retention_8113	FBXO2	ENSG00000116661.9	chr1 | -	IR	11709584:11709931-11709931:11710022-11710022:11710131	11709584:11710131	0.563	0.1632	1	0.58
CESC	TCGA-C5-A2LS-01A-22R-A22U-07.06121F93-9719-4D96-94E1-5B8AFCC347A7.aligned		intron_retention_8113	FBXO2	ENSG00000116661.9	chr1 | -	IR	11709584:11709931-11709931:11710022-11710022:11710131	11709584:11710131	0.563	0.1632	1	0.58
CESC	TCGA-C5-A2LT-01A-11R-A18M-07.26616de7-08df-4359-9c00-c649409b1480.aligned	1	intron_retention_8113	FBXO2	ENSG00000116661.9	chr1 | -	IR	11709584:11709931-11709931:11710022-11710022:11710131	11709584:11710131	0.563	0.1632	1	0.58
CESC	TCGA-C5-A2LV-01A-11R-A18M-07.a6a4630e-3d28-4a38-8c9f-29fc0c7b380a.aligned	0.705	intron_retention_8113	FBXO2	ENSG00000116661.9	chr1 | -	IR	11709584:11709931-11709931:11710022-11710022:11710131	11709584:11710131	0.563	0.1632	1	0.58
CESC	TCGA-C5-A2LZ-01A-11R-A213-07.93810b75-cbbb-4dbb-bbe1-efb66d19516d.aligned	1	intron_retention_8113	FBXO2	ENSG00000116661.9	chr1 | -	IR	11709584:11709931-11709931:11710022-11710022:11710131	11709584:11710131	0.563	0.1632	1	0.58
CESC	TCGA-C5-A2M1-01A-11R-A18M-07.5c5d18f0-dc25-4d65-9ea7-f90d69db0ce8.aligned	0.731	intron_retention_8113	FBXO2	ENSG00000116661.9	chr1 | -	IR	11709584:11709931-11709931:11710022-11710022:11710131	11709584:11710131	0.563	0.1632	1	0.58
CESC	TCGA-C5-A2M2-01A-21R-A18M-07.00471faf-5a40-430a-8555-564fa885f618.aligned		intron_retention_8113	FBXO2	ENSG00000116661.9	chr1 | -	IR	11709584:11709931-11709931:11710022-11710022:11710131	11709584:11710131	0.563	0.1632	1	0.58
CESC	TCGA-C5-A3HD-01B-11R-A213-07.cbf9a913-bf0f-41cf-b7c5-048b72bbbb5d.aligned		intron_retention_8113	FBXO2	ENSG00000116661.9	chr1 | -	IR	11709584:11709931-11709931:11710022-11710022:11710131	11709584:11710131	0.563	0.1632	1	0.58
CESC	TCGA-C5-A3HE-01A-21R-A22U-07.E26F5A99-6A8D-429E-8849-8A9B5680D466.aligned	1	intron_retention_8113	FBXO2	ENSG00000116661.9	chr1 | -	IR	11709584:11709931-11709931:11710022-11710022:11710131	11709584:11710131	0.563	0.1632	1	0.58
CESC	TCGA-C5-A3HF-01A-11R-A213-07.f426f6c4-bb1f-4ce4-a770-7b5fcc4408fa.aligned		intron_retention_8113	FBXO2	ENSG00000116661.9	chr1 | -	IR	11709584:11709931-11709931:11710022-11710022:11710131	11709584:11710131	0.563	0.1632	1	0.58
CESC	TCGA-C5-A3HL-01A-11R-A213-07.3337929b-5381-41ae-88f2-b6dbeb17f088.aligned	1	intron_retention_8113	FBXO2	ENSG00000116661.9	chr1 | -	IR	11709584:11709931-11709931:11710022-11710022:11710131	11709584:11710131	0.563	0.1632	1	0.58
CESC	TCGA-C5-A7CG-01A-11R-A32P-07.5abdff9b-a6a9-4564-9ac3-98a563f65fe6.aligned		intron_retention_8113	FBXO2	ENSG00000116661.9	chr1 | -	IR	11709584:11709931-11709931:11710022-11710022:11710131	11709584:11710131	0.563	0.1632	1	0.58
CESC	TCGA-C5-A7CH-01A-11R-A33Z-07.09f55b71-b6ee-42a5-96eb-6a2929e35bbf.aligned	0.774	intron_retention_8113	FBXO2	ENSG00000116661.9	chr1 | -	IR	11709584:11709931-11709931:11710022-11710022:11710131	11709584:11710131	0.563	0.1632	1	0.58
CESC	TCGA-C5-A7CJ-01A-11R-A32P-07.723cafa2-ce72-4c19-954b-9be09a1b08e9.aligned		intron_retention_8113	FBXO2	ENSG00000116661.9	chr1 | -	IR	11709584:11709931-11709931:11710022-11710022:11710131	11709584:11710131	0.563	0.1632	1	0.58
CESC	TCGA-C5-A7CK-01A-11R-A32P-07.5e38ec7f-6d2a-4e9c-98ee-fc00832d2aeb.aligned		intron_retention_8113	FBXO2	ENSG00000116661.9	chr1 | -	IR	11709584:11709931-11709931:11710022-11710022:11710131	11709584:11710131	0.563	0.1632	1	0.58
CESC	TCGA-C5-A7CL-01A-11R-A32P-07.131525c8-7f24-48c3-bef9-cc9414e793b8.aligned		intron_retention_8113	FBXO2	ENSG00000116661.9	chr1 | -	IR	11709584:11709931-11709931:11710022-11710022:11710131	11709584:11710131	0.563	0.1632	1	0.58
CESC	TCGA-C5-A7CM-01A-11R-A33Z-07.f227e397-0bc7-4e98-a7ea-befd78191cc3.aligned		intron_retention_8113	FBXO2	ENSG00000116661.9	chr1 | -	IR	11709584:11709931-11709931:11710022-11710022:11710131	11709584:11710131	0.563	0.1632	1	0.58
CESC	TCGA-C5-A7CO-01A-11R-A352-07.3292c30c-9fa5-4c11-a6ff-57282c7961fa.aligned	1	intron_retention_8113	FBXO2	ENSG00000116661.9	chr1 | -	IR	11709584:11709931-11709931:11710022-11710022:11710131	11709584:11710131	0.563	0.1632	1	0.58
CESC	TCGA-C5-A7UC-01A-11R-A352-07.4dfd8634-77b6-40c5-9b01-e9e4e354be1e.aligned	0.649	intron_retention_8113	FBXO2	ENSG00000116661.9	chr1 | -	IR	11709584:11709931-11709931:11710022-11710022:11710131	11709584:11710131	0.563	0.1632	1	0.58
CESC	TCGA-C5-A7UH-01A-11R-A352-07.1bf205a9-a7fb-4a53-8b3d-9943b91481c2.aligned	0.736	intron_retention_8113	FBXO2	ENSG00000116661.9	chr1 | -	IR	11709584:11709931-11709931:11710022-11710022:11710131	11709584:11710131	0.563	0.1632	1	0.58
CESC	TCGA-C5-A7X3-01A-11R-A352-07.fb4a5161-67f4-4679-8d85-bb1843f3b897.aligned	1	intron_retention_8113	FBXO2	ENSG00000116661.9	chr1 | -	IR	11709584:11709931-11709931:11710022-11710022:11710131	11709584:11710131	0.563	0.1632	1	0.58
CESC	TCGA-C5-A7X5-01A-11R-A36F-07.39d645d6-f7ca-4a01-a3b0-5ae3754c8a68.aligned	0.76	intron_retention_8113	FBXO2	ENSG00000116661.9	chr1 | -	IR	11709584:11709931-11709931:11710022-11710022:11710131	11709584:11710131	0.563	0.1632	1	0.58
CESC	TCGA-C5-A7X8-01A-11R-A36F-07.7a835fc9-6dfb-464a-bbe0-d42782abab4c.aligned		intron_retention_8113	FBXO2	ENSG00000116661.9	chr1 | -	IR	11709584:11709931-11709931:11710022-11710022:11710131	11709584:11710131	0.563	0.1632	1	0.58
CESC	TCGA-C5-A7XC-01A-11R-A38B-07.8130cfd8-49c8-429d-b559-7ff8f1d359fa.aligned	1	intron_retention_8113	FBXO2	ENSG00000116661.9	chr1 | -	IR	11709584:11709931-11709931:11710022-11710022:11710131	11709584:11710131	0.563	0.1632	1	0.58
CESC	TCGA-C5-A8XH-01A-11R-A37O-07.ea9fda3a-9efa-4847-aea0-d85f22ab14ca.aligned	1	intron_retention_8113	FBXO2	ENSG00000116661.9	chr1 | -	IR	11709584:11709931-11709931:11710022-11710022:11710131	11709584:11710131	0.563	0.1632	1	0.58
CESC	TCGA-C5-A8XI-01A-11R-A37O-07.d1d352f8-4919-4288-8e6a-bbf550a7236b.aligned	1	intron_retention_8113	FBXO2	ENSG00000116661.9	chr1 | -	IR	11709584:11709931-11709931:11710022-11710022:11710131	11709584:11710131	0.563	0.1632	1	0.58
CESC	TCGA-C5-A8XJ-01A-11R-A37O-07.971dec7f-6cb5-4575-85f7-be59097ae606.aligned	1	intron_retention_8113	FBXO2	ENSG00000116661.9	chr1 | -	IR	11709584:11709931-11709931:11710022-11710022:11710131	11709584:11710131	0.563	0.1632	1	0.58
CESC	TCGA-C5-A8XK-01A-11R-A37O-07.94f22e5d-e471-4add-9291-27bc5c96a519.aligned	0.712	intron_retention_8113	FBXO2	ENSG00000116661.9	chr1 | -	IR	11709584:11709931-11709931:11710022-11710022:11710131	11709584:11710131	0.563	0.1632	1	0.58
CESC	TCGA-C5-A8YQ-01A-11R-A37O-07.f11b075c-7ada-4945-b3a2-2eee097c077d.aligned		intron_retention_8113	FBXO2	ENSG00000116661.9	chr1 | -	IR	11709584:11709931-11709931:11710022-11710022:11710131	11709584:11710131	0.563	0.1632	1	0.58
CESC	TCGA-C5-A8YR-01A-12R-A37O-07.073d66b5-917e-45e3-8104-b8d4dfa28e6b.aligned	0.577	intron_retention_8113	FBXO2	ENSG00000116661.9	chr1 | -	IR	11709584:11709931-11709931:11710022-11710022:11710131	11709584:11710131	0.563	0.1632	1	0.58
CESC	TCGA-C5-A8YT-01A-11R-A37O-07.6cec0faf-100b-48b0-9221-fb1be7ff8597.aligned		intron_retention_8113	FBXO2	ENSG00000116661.9	chr1 | -	IR	11709584:11709931-11709931:11710022-11710022:11710131	11709584:11710131	0.563	0.1632	1	0.58
CESC	TCGA-C5-A8ZZ-01A-11R-A37O-07.5f23cd19-f7f0-43e3-961d-0236da5f49ae.aligned		intron_retention_8113	FBXO2	ENSG00000116661.9	chr1 | -	IR	11709584:11709931-11709931:11710022-11710022:11710131	11709584:11710131	0.563	0.1632	1	0.58
CESC	TCGA-C5-A901-01A-11R-A37O-07.8f532265-5436-4bd8-9766-4b768c84514a.aligned	1	intron_retention_8113	FBXO2	ENSG00000116661.9	chr1 | -	IR	11709584:11709931-11709931:11710022-11710022:11710131	11709584:11710131	0.563	0.1632	1	0.58
CESC	TCGA-C5-A902-01A-11R-A37O-07.7a1a71ad-c117-4091-bc20-88617bcb99d9.aligned	0.695	intron_retention_8113	FBXO2	ENSG00000116661.9	chr1 | -	IR	11709584:11709931-11709931:11710022-11710022:11710131	11709584:11710131	0.563	0.1632	1	0.58
CESC	TCGA-C5-A905-01A-11R-A37O-07.729d243c-73f2-42d2-8737-55275a062a8f.aligned		intron_retention_8113	FBXO2	ENSG00000116661.9	chr1 | -	IR	11709584:11709931-11709931:11710022-11710022:11710131	11709584:11710131	0.563	0.1632	1	0.58
CESC	TCGA-C5-A907-01A-11R-A37O-07.13b52657-459f-45f6-a4ce-a2da459104ac.aligned	0.719	intron_retention_8113	FBXO2	ENSG00000116661.9	chr1 | -	IR	11709584:11709931-11709931:11710022-11710022:11710131	11709584:11710131	0.563	0.1632	1	0.58
CESC	TCGA-DG-A2KH-01A-21R-A22U-07.A5793D2B-3DEC-477F-B29B-163D235431AC.aligned		intron_retention_8113	FBXO2	ENSG00000116661.9	chr1 | -	IR	11709584:11709931-11709931:11710022-11710022:11710131	11709584:11710131	0.563	0.1632	1	0.58
CESC	TCGA-DG-A2KK-01A-11R-A180-07.b58a46e6-797d-4f88-88ef-932d0d2a6f6e.aligned	0.721	intron_retention_8113	FBXO2	ENSG00000116661.9	chr1 | -	IR	11709584:11709931-11709931:11710022-11710022:11710131	11709584:11710131	0.563	0.1632	1	0.58
CESC	TCGA-DG-A2KL-01A-11R-A180-07.b107d3e2-8d45-425c-9aa7-0293463b6d66.aligned	1	intron_retention_8113	FBXO2	ENSG00000116661.9	chr1 | -	IR	11709584:11709931-11709931:11710022-11710022:11710131	11709584:11710131	0.563	0.1632	1	0.58
CESC	TCGA-DG-A2KM-01A-11R-A180-07.04bf866a-cb97-4e47-a3dd-2fe2e0c5d123.aligned	1	intron_retention_8113	FBXO2	ENSG00000116661.9	chr1 | -	IR	11709584:11709931-11709931:11710022-11710022:11710131	11709584:11710131	0.563	0.1632	1	0.58
CESC	TCGA-DR-A0ZL-01A-11R-A10U-07.6252138d-526e-4ed4-8369-7d6e4bde3fbe.aligned		intron_retention_8113	FBXO2	ENSG00000116661.9	chr1 | -	IR	11709584:11709931-11709931:11710022-11710022:11710131	11709584:11710131	0.563	0.1632	1	0.58
CESC	TCGA-DS-A0VK-01A-21R-A10U-07.7e67a342-4e90-47f9-9c95-03d32009e858.aligned	1	intron_retention_8113	FBXO2	ENSG00000116661.9	chr1 | -	IR	11709584:11709931-11709931:11710022-11710022:11710131	11709584:11710131	0.563	0.1632	1	0.58
CESC	TCGA-DS-A0VL-01A-21R-A10U-07.b9e35423-81e4-4ffe-b08a-4bb93b3cf976.aligned	1	intron_retention_8113	FBXO2	ENSG00000116661.9	chr1 | -	IR	11709584:11709931-11709931:11710022-11710022:11710131	11709584:11710131	0.563	0.1632	1	0.58
CESC	TCGA-DS-A0VM-01A-11R-A10U-07.16ced370-3e97-40a5-9743-6bdd7bbc37d3.aligned	1	intron_retention_8113	FBXO2	ENSG00000116661.9	chr1 | -	IR	11709584:11709931-11709931:11710022-11710022:11710131	11709584:11710131	0.563	0.1632	1	0.58
CESC	TCGA-DS-A0VN-01A-21R-A10U-07.1fc14ee0-e307-4349-a2ac-9e28c31163f2.aligned	0.699	intron_retention_8113	FBXO2	ENSG00000116661.9	chr1 | -	IR	11709584:11709931-11709931:11710022-11710022:11710131	11709584:11710131	0.563	0.1632	1	0.58
CESC	TCGA-DS-A1OA-01A-11R-A14Y-07.656bb2ee-b7f9-4cee-a694-1217fecf25a7.aligned	1	intron_retention_8113	FBXO2	ENSG00000116661.9	chr1 | -	IR	11709584:11709931-11709931:11710022-11710022:11710131	11709584:11710131	0.563	0.1632	1	0.58
CESC	TCGA-DS-A1OB-01A-11R-A14Y-07.aabf5831-8886-4570-9266-00cd858ba17b.aligned		intron_retention_8113	FBXO2	ENSG00000116661.9	chr1 | -	IR	11709584:11709931-11709931:11710022-11710022:11710131	11709584:11710131	0.563	0.1632	1	0.58
CESC	TCGA-DS-A1OC-01A-11R-A14Y-07.694a3bf4-f789-4aef-9dc8-13f4f8ae0283.aligned		intron_retention_8113	FBXO2	ENSG00000116661.9	chr1 | -	IR	11709584:11709931-11709931:11710022-11710022:11710131	11709584:11710131	0.563	0.1632	1	0.58
CESC	TCGA-DS-A1OD-01A-11R-A14Y-07.3ed6846b-8a17-4eed-bc64-c28fb9aed192.aligned	1	intron_retention_8113	FBXO2	ENSG00000116661.9	chr1 | -	IR	11709584:11709931-11709931:11710022-11710022:11710131	11709584:11710131	0.563	0.1632	1	0.58
CESC	TCGA-DS-A3LQ-01A-21R-A21T-07.6F54279A-F0B1-4E9D-9E71-7F91CEF40BA2.aligned		intron_retention_8113	FBXO2	ENSG00000116661.9	chr1 | -	IR	11709584:11709931-11709931:11710022-11710022:11710131	11709584:11710131	0.563	0.1632	1	0.58
CESC	TCGA-DS-A5RQ-01A-11R-A28H-07.80241bee-c4e9-4ce7-a920-022f8b00e21d.aligned	1	intron_retention_8113	FBXO2	ENSG00000116661.9	chr1 | -	IR	11709584:11709931-11709931:11710022-11710022:11710131	11709584:11710131	0.563	0.1632	1	0.58
CESC	TCGA-DS-A7WF-01A-11R-A352-07.5f6b58e1-df96-4c94-aa88-e4f23339794c.aligned		intron_retention_8113	FBXO2	ENSG00000116661.9	chr1 | -	IR	11709584:11709931-11709931:11710022-11710022:11710131	11709584:11710131	0.563	0.1632	1	0.58
CESC	TCGA-DS-A7WH-01A-22R-A352-07.3380e6d8-52a0-4b19-acb1-2fb686cbd5df.aligned		intron_retention_8113	FBXO2	ENSG00000116661.9	chr1 | -	IR	11709584:11709931-11709931:11710022-11710022:11710131	11709584:11710131	0.563	0.1632	1	0.58
CESC	TCGA-EA-A1QS-01A-61R-A22U-07.88EE3A4F-7688-4247-B03C-73F6E3AF7493.aligned	1	intron_retention_8113	FBXO2	ENSG00000116661.9	chr1 | -	IR	11709584:11709931-11709931:11710022-11710022:11710131	11709584:11710131	0.563	0.1632	1	0.58
CESC	TCGA-EA-A1QT-01A-11R-A14Y-07.3aab069c-f3e6-4a95-89eb-bf896b36c4b3.aligned	1	intron_retention_8113	FBXO2	ENSG00000116661.9	chr1 | -	IR	11709584:11709931-11709931:11710022-11710022:11710131	11709584:11710131	0.563	0.1632	1	0.58
CESC	TCGA-EA-A3HQ-01A-11R-A213-07.886e8f4f-107d-4ebd-a312-7cdbacabd35e.aligned		intron_retention_8113	FBXO2	ENSG00000116661.9	chr1 | -	IR	11709584:11709931-11709931:11710022-11710022:11710131	11709584:11710131	0.563	0.1632	1	0.58
CESC	TCGA-EA-A3HR-01A-11R-A213-07.7feffd22-85c5-4bf9-9a41-28a1f4e0586d.aligned		intron_retention_8113	FBXO2	ENSG00000116661.9	chr1 | -	IR	11709584:11709931-11709931:11710022-11710022:11710131	11709584:11710131	0.563	0.1632	1	0.58
CESC	TCGA-EA-A3HS-01A-11R-A213-07.833baf21-bec9-4fde-aa6b-fb1b1256ae26.aligned	1	intron_retention_8113	FBXO2	ENSG00000116661.9	chr1 | -	IR	11709584:11709931-11709931:11710022-11710022:11710131	11709584:11710131	0.563	0.1632	1	0.58
CESC	TCGA-EA-A3HT-01A-61R-A21T-07.6CF5747F-22B4-498F-B8CE-13E4A2741883.aligned		intron_retention_8113	FBXO2	ENSG00000116661.9	chr1 | -	IR	11709584:11709931-11709931:11710022-11710022:11710131	11709584:11710131	0.563	0.1632	1	0.58
CESC	TCGA-EA-A3HU-01A-11R-A213-07.b99c2f7f-3b3c-4ea9-b6b1-84aadaeecd91.aligned		intron_retention_8113	FBXO2	ENSG00000116661.9	chr1 | -	IR	11709584:11709931-11709931:11710022-11710022:11710131	11709584:11710131	0.563	0.1632	1	0.58
CESC	TCGA-EA-A3QD-01A-32R-A22U-07.E35790F7-26DF-4D0A-9474-88F13372D606.aligned		intron_retention_8113	FBXO2	ENSG00000116661.9	chr1 | -	IR	11709584:11709931-11709931:11710022-11710022:11710131	11709584:11710131	0.563	0.1632	1	0.58
CESC	TCGA-EA-A3QE-01A-21R-A21T-07.6EDC7D3A-9F83-449F-A371-C040D8B5164D.aligned	1	intron_retention_8113	FBXO2	ENSG00000116661.9	chr1 | -	IR	11709584:11709931-11709931:11710022-11710022:11710131	11709584:11710131	0.563	0.1632	1	0.58
CESC	TCGA-EA-A410-01A-11R-A32Y-07.e9e998be-4353-441e-83ec-d8c010b0dc79.aligned		intron_retention_8113	FBXO2	ENSG00000116661.9	chr1 | -	IR	11709584:11709931-11709931:11710022-11710022:11710131	11709584:11710131	0.563	0.1632	1	0.58
CESC	TCGA-EA-A411-01A-11R-A24H-07.27e35f6c-7d6c-46e8-844d-e08a5920af3e.aligned	1	intron_retention_8113	FBXO2	ENSG00000116661.9	chr1 | -	IR	11709584:11709931-11709931:11710022-11710022:11710131	11709584:11710131	0.563	0.1632	1	0.58
CESC	TCGA-EA-A439-01A-11R-A24H-07.f930146b-0cec-4630-8f79-0e233c238b15.aligned		intron_retention_8113	FBXO2	ENSG00000116661.9	chr1 | -	IR	11709584:11709931-11709931:11710022-11710022:11710131	11709584:11710131	0.563	0.1632	1	0.58
CESC	TCGA-EA-A50E-01A-21R-A26T-07.6b9951d1-1bae-4c66-acad-c6c618d5387d.aligned		intron_retention_8113	FBXO2	ENSG00000116661.9	chr1 | -	IR	11709584:11709931-11709931:11710022-11710022:11710131	11709584:11710131	0.563	0.1632	1	0.58
CESC	TCGA-EA-A556-01A-11R-A26T-07.0dadcb32-0c50-4d9b-8112-d4e533e789d6.aligned	1	intron_retention_8113	FBXO2	ENSG00000116661.9	chr1 | -	IR	11709584:11709931-11709931:11710022-11710022:11710131	11709584:11710131	0.563	0.1632	1	0.58
CESC	TCGA-EA-A5FO-01A-21R-A28H-07.1ff2db10-00fe-4ddc-98d1-e15ffea42333.aligned		intron_retention_8113	FBXO2	ENSG00000116661.9	chr1 | -	IR	11709584:11709931-11709931:11710022-11710022:11710131	11709584:11710131	0.563	0.1632	1	0.58
CESC	TCGA-EA-A5O9-01A-11R-A28H-07.9ecc833d-b92d-474a-a981-d6e0c12292e0.aligned		intron_retention_8113	FBXO2	ENSG00000116661.9	chr1 | -	IR	11709584:11709931-11709931:11710022-11710022:11710131	11709584:11710131	0.563	0.1632	1	0.58
CESC	TCGA-EA-A5ZD-01A-11R-A28H-07.8bb52467-45b2-40d5-abd2-69ff0ad83bc5.aligned		intron_retention_8113	FBXO2	ENSG00000116661.9	chr1 | -	IR	11709584:11709931-11709931:11710022-11710022:11710131	11709584:11710131	0.563	0.1632	1	0.58
CESC	TCGA-EA-A5ZE-01A-11R-A28H-07.0ec8f213-1b87-4c8e-86b8-90362601df4a.aligned	0.643	intron_retention_8113	FBXO2	ENSG00000116661.9	chr1 | -	IR	11709584:11709931-11709931:11710022-11710022:11710131	11709584:11710131	0.563	0.1632	1	0.58
CESC	TCGA-EA-A5ZF-01A-11R-A28H-07.687d43fb-fb87-464d-a661-697889b99aed.aligned		intron_retention_8113	FBXO2	ENSG00000116661.9	chr1 | -	IR	11709584:11709931-11709931:11710022-11710022:11710131	11709584:11710131	0.563	0.1632	1	0.58
CESC	TCGA-EA-A6QX-01A-12R-A33Z-07.9ce21675-b3ac-45b0-85c6-f3b2e4188944.aligned	1	intron_retention_8113	FBXO2	ENSG00000116661.9	chr1 | -	IR	11709584:11709931-11709931:11710022-11710022:11710131	11709584:11710131	0.563	0.1632	1	0.58
CESC	TCGA-EA-A97N-01A-11R-A38B-07.05293acf-1896-4a84-af90-0fe7483bdb66.aligned		intron_retention_8113	FBXO2	ENSG00000116661.9	chr1 | -	IR	11709584:11709931-11709931:11710022-11710022:11710131	11709584:11710131	0.563	0.1632	1	0.58
CESC	TCGA-EK-A2GZ-01A-11R-A180-07.76e090d4-d2c2-4918-97d8-4dd1dbea5452.aligned	0.729	intron_retention_8113	FBXO2	ENSG00000116661.9	chr1 | -	IR	11709584:11709931-11709931:11710022-11710022:11710131	11709584:11710131	0.563	0.1632	1	0.58
CESC	TCGA-EK-A2H0-01A-11R-A180-07.c59486e3-0de6-4fd2-adef-b3b369d41e7c.aligned		intron_retention_8113	FBXO2	ENSG00000116661.9	chr1 | -	IR	11709584:11709931-11709931:11710022-11710022:11710131	11709584:11710131	0.563	0.1632	1	0.58
CESC	TCGA-EK-A2PI-01A-11R-A18M-07.689fb0d6-789a-45c2-8f2f-12cc3a2ea553.aligned		intron_retention_8113	FBXO2	ENSG00000116661.9	chr1 | -	IR	11709584:11709931-11709931:11710022-11710022:11710131	11709584:11710131	0.563	0.1632	1	0.58
CESC	TCGA-EK-A2PK-01A-11R-A18M-07.1e176d9d-dba9-4d41-946e-05b7f35eba64.aligned	1	intron_retention_8113	FBXO2	ENSG00000116661.9	chr1 | -	IR	11709584:11709931-11709931:11710022-11710022:11710131	11709584:11710131	0.563	0.1632	1	0.58
CESC	TCGA-EK-A2PL-01A-11R-A18M-07.550b677c-c33a-499c-95dc-68250384b6a8.aligned	1	intron_retention_8113	FBXO2	ENSG00000116661.9	chr1 | -	IR	11709584:11709931-11709931:11710022-11710022:11710131	11709584:11710131	0.563	0.1632	1	0.58
CESC	TCGA-EK-A2PM-01A-11R-A18M-07.44a2f3dd-bf3d-4b8f-9b34-d1eb228e5476.aligned		intron_retention_8113	FBXO2	ENSG00000116661.9	chr1 | -	IR	11709584:11709931-11709931:11710022-11710022:11710131	11709584:11710131	0.563	0.1632	1	0.58
CESC	TCGA-EK-A2R7-01A-11R-A18M-07.ebe70126-032b-4f1e-9d89-1e0bd2f05907.aligned	0.595	intron_retention_8113	FBXO2	ENSG00000116661.9	chr1 | -	IR	11709584:11709931-11709931:11710022-11710022:11710131	11709584:11710131	0.563	0.1632	1	0.58
CESC	TCGA-EK-A2R8-01A-21R-A18M-07.5ff64ded-bdb0-4125-b1b9-8a3945e82810.aligned	1	intron_retention_8113	FBXO2	ENSG00000116661.9	chr1 | -	IR	11709584:11709931-11709931:11710022-11710022:11710131	11709584:11710131	0.563	0.1632	1	0.58
CESC	TCGA-EK-A2RC-01A-11R-A18M-07.fa8d81bb-a026-426c-8e24-2c8ca93007c4.aligned	1	intron_retention_8113	FBXO2	ENSG00000116661.9	chr1 | -	IR	11709584:11709931-11709931:11710022-11710022:11710131	11709584:11710131	0.563	0.1632	1	0.58
CESC	TCGA-EK-A2RE-01A-11R-A18M-07.51257d94-f973-4dfd-93d7-72ec4013def7.aligned	1	intron_retention_8113	FBXO2	ENSG00000116661.9	chr1 | -	IR	11709584:11709931-11709931:11710022-11710022:11710131	11709584:11710131	0.563	0.1632	1	0.58
CESC	TCGA-EK-A2RJ-01A-11R-A18M-07.48ee0be7-9c0f-4e6d-81cf-638c52beef8b.aligned	1	intron_retention_8113	FBXO2	ENSG00000116661.9	chr1 | -	IR	11709584:11709931-11709931:11710022-11710022:11710131	11709584:11710131	0.563	0.1632	1	0.58
CESC	TCGA-EK-A2RK-01A-11R-A18M-07.2713b35a-f04a-4078-85c6-34140350398f.aligned		intron_retention_8113	FBXO2	ENSG00000116661.9	chr1 | -	IR	11709584:11709931-11709931:11710022-11710022:11710131	11709584:11710131	0.563	0.1632	1	0.58
CESC	TCGA-EK-A2RL-01A-11R-A18M-07.0e842eda-bb7f-4f4a-b1bc-9d6dcf563125.aligned		intron_retention_8113	FBXO2	ENSG00000116661.9	chr1 | -	IR	11709584:11709931-11709931:11710022-11710022:11710131	11709584:11710131	0.563	0.1632	1	0.58
CESC	TCGA-EK-A2RM-01A-21R-A18M-07.1a6ee24e-975c-4ba8-8cc3-666555fb89d6.aligned	0.656	intron_retention_8113	FBXO2	ENSG00000116661.9	chr1 | -	IR	11709584:11709931-11709931:11710022-11710022:11710131	11709584:11710131	0.563	0.1632	1	0.58
CESC	TCGA-EK-A2RO-01A-11R-A18M-07.6c6c44ac-3626-482e-8d33-adbd122f8352.aligned		intron_retention_8113	FBXO2	ENSG00000116661.9	chr1 | -	IR	11709584:11709931-11709931:11710022-11710022:11710131	11709584:11710131	0.563	0.1632	1	0.58
CESC	TCGA-EK-A3GJ-01A-21R-A213-07.1dbe0951-14cc-4489-aaf2-f3592be05f07.aligned	1	intron_retention_8113	FBXO2	ENSG00000116661.9	chr1 | -	IR	11709584:11709931-11709931:11710022-11710022:11710131	11709584:11710131	0.563	0.1632	1	0.58
CESC	TCGA-EK-A3GK-01A-11R-A213-07.6878010a-30d5-44ef-bd70-99f532a584d5.aligned	1	intron_retention_8113	FBXO2	ENSG00000116661.9	chr1 | -	IR	11709584:11709931-11709931:11710022-11710022:11710131	11709584:11710131	0.563	0.1632	1	0.58
CESC	TCGA-EK-A3GM-01A-11R-A213-07.8bae571a-8285-48dd-aea3-9eb002c0610b.aligned	1	intron_retention_8113	FBXO2	ENSG00000116661.9	chr1 | -	IR	11709584:11709931-11709931:11710022-11710022:11710131	11709584:11710131	0.563	0.1632	1	0.58
CESC	TCGA-EK-A3GN-01A-11R-A213-07.b74c4373-3809-4536-85ef-4c9e651a913e.aligned	0.684	intron_retention_8113	FBXO2	ENSG00000116661.9	chr1 | -	IR	11709584:11709931-11709931:11710022-11710022:11710131	11709584:11710131	0.563	0.1632	1	0.58
CESC	TCGA-EX-A1H5-01A-31R-A13Y-07.6a65b2f5-ebe5-4974-9ca6-7e824e7ca087.aligned		intron_retention_8113	FBXO2	ENSG00000116661.9	chr1 | -	IR	11709584:11709931-11709931:11710022-11710022:11710131	11709584:11710131	0.563	0.1632	1	0.58
CESC	TCGA-EX-A3L1-01A-11R-A32Y-07.576cc9e7-f32b-4478-a8a6-e77c16a07e35.aligned	0.706	intron_retention_8113	FBXO2	ENSG00000116661.9	chr1 | -	IR	11709584:11709931-11709931:11710022-11710022:11710131	11709584:11710131	0.563	0.1632	1	0.58
CESC	TCGA-EX-A449-01A-11R-A32Y-07.028824a6-0890-43c9-a46f-48a23483d205.aligned		intron_retention_8113	FBXO2	ENSG00000116661.9	chr1 | -	IR	11709584:11709931-11709931:11710022-11710022:11710131	11709584:11710131	0.563	0.1632	1	0.58
CESC	TCGA-EX-A69L-01A-11R-A32P-07.c51e3133-d702-41cd-af51-094a31f449d4.aligned		intron_retention_8113	FBXO2	ENSG00000116661.9	chr1 | -	IR	11709584:11709931-11709931:11710022-11710022:11710131	11709584:11710131	0.563	0.1632	1	0.58
CESC	TCGA-EX-A69M-01A-11R-A32P-07.81417e28-9132-4081-a85f-ed63396427c3.aligned		intron_retention_8113	FBXO2	ENSG00000116661.9	chr1 | -	IR	11709584:11709931-11709931:11710022-11710022:11710131	11709584:11710131	0.563	0.1632	1	0.58
CESC	TCGA-EX-A8YF-01A-11R-A37O-07.1c3b1633-b318-486c-9d82-101c4a0364cd.aligned	1	intron_retention_8113	FBXO2	ENSG00000116661.9	chr1 | -	IR	11709584:11709931-11709931:11710022-11710022:11710131	11709584:11710131	0.563	0.1632	1	0.58
CESC	TCGA-FU-A23L-01A-11R-A16R-07.58ccb54d-2d23-4bce-b05d-02e543d83306.aligned	0.638	intron_retention_8113	FBXO2	ENSG00000116661.9	chr1 | -	IR	11709584:11709931-11709931:11710022-11710022:11710131	11709584:11710131	0.563	0.1632	1	0.58
CESC	TCGA-FU-A2QG-01A-11R-A18M-07.7e7e0d0f-aa97-4c0d-bffc-7d8977288836.aligned	0.709	intron_retention_8113	FBXO2	ENSG00000116661.9	chr1 | -	IR	11709584:11709931-11709931:11710022-11710022:11710131	11709584:11710131	0.563	0.1632	1	0.58
CESC	TCGA-FU-A3EO-11A-13R-A213-07.3349e197-7ef8-4cfd-b365-1dbf5c7db58d.aligned	1	intron_retention_8113	FBXO2	ENSG00000116661.9	chr1 | -	IR	11709584:11709931-11709931:11710022-11710022:11710131	11709584:11710131	0.563	0.1632	1	0.58
CESC	TCGA-FU-A3HY-01A-11R-A21T-07.8724D94D-C194-491B-8C0E-38675B59C2E8.aligned	0.42	intron_retention_8113	FBXO2	ENSG00000116661.9	chr1 | -	IR	11709584:11709931-11709931:11710022-11710022:11710131	11709584:11710131	0.563	0.1632	1	0.58
CESC	TCGA-FU-A3HZ-01A-11R-A213-07.a886bebc-9578-424a-910c-43ebff0d5696.aligned		intron_retention_8113	FBXO2	ENSG00000116661.9	chr1 | -	IR	11709584:11709931-11709931:11710022-11710022:11710131	11709584:11710131	0.563	0.1632	1	0.58
CESC	TCGA-FU-A3NI-01A-11R-A21T-07.38948BD8-BC9A-4E38-9F7A-F72D3531050E.aligned	1	intron_retention_8113	FBXO2	ENSG00000116661.9	chr1 | -	IR	11709584:11709931-11709931:11710022-11710022:11710131	11709584:11710131	0.563	0.1632	1	0.58
CESC	TCGA-FU-A3TQ-01A-11R-A22U-07.AAB8AE6F-AE54-4203-B2E6-2B86B9CA0337.aligned		intron_retention_8113	FBXO2	ENSG00000116661.9	chr1 | -	IR	11709584:11709931-11709931:11710022-11710022:11710131	11709584:11710131	0.563	0.1632	1	0.58
CESC	TCGA-FU-A3TX-01A-11R-A22U-07.D1F596D6-1F2C-4728-BE8C-0EF9CC402F88.aligned	0.685	intron_retention_8113	FBXO2	ENSG00000116661.9	chr1 | -	IR	11709584:11709931-11709931:11710022-11710022:11710131	11709584:11710131	0.563	0.1632	1	0.58
CESC	TCGA-FU-A3WB-01A-11R-A22U-07.A1DBD227-73B7-466F-B766-063A3006A206.aligned		intron_retention_8113	FBXO2	ENSG00000116661.9	chr1 | -	IR	11709584:11709931-11709931:11710022-11710022:11710131	11709584:11710131	0.563	0.1632	1	0.58
CESC	TCGA-FU-A3YQ-01A-11R-A22U-07.622F0488-00C2-4F4F-8D5E-6CC9AB5B0E11.aligned		intron_retention_8113	FBXO2	ENSG00000116661.9	chr1 | -	IR	11709584:11709931-11709931:11710022-11710022:11710131	11709584:11710131	0.563	0.1632	1	0.58
CESC	TCGA-FU-A40J-01A-11R-A24H-07.26cdb816-44f0-4ff6-a674-93ec31d64fed.aligned	1	intron_retention_8113	FBXO2	ENSG00000116661.9	chr1 | -	IR	11709584:11709931-11709931:11710022-11710022:11710131	11709584:11710131	0.563	0.1632	1	0.58
CESC	TCGA-FU-A57G-01A-11R-A26T-07.93bf6de4-c67e-4d0b-8fe6-2431a0e0d342.aligned		intron_retention_8113	FBXO2	ENSG00000116661.9	chr1 | -	IR	11709584:11709931-11709931:11710022-11710022:11710131	11709584:11710131	0.563	0.1632	1	0.58
CESC	TCGA-FU-A5XV-01A-11R-A28H-07.97a13a19-7b9b-4e53-9dfe-6a5836a44510.aligned	1	intron_retention_8113	FBXO2	ENSG00000116661.9	chr1 | -	IR	11709584:11709931-11709931:11710022-11710022:11710131	11709584:11710131	0.563	0.1632	1	0.58
CESC	TCGA-FU-A770-01A-11R-A33Z-07.75aa1caf-bfa3-4365-a066-31a968ad3d9b.aligned		intron_retention_8113	FBXO2	ENSG00000116661.9	chr1 | -	IR	11709584:11709931-11709931:11710022-11710022:11710131	11709584:11710131	0.563	0.1632	1	0.58
CESC	TCGA-GH-A9DA-01A-21R-A37O-07.6977f6c7-f4cf-4669-81fd-7740fd5e64f1.aligned	0.65	intron_retention_8113	FBXO2	ENSG00000116661.9	chr1 | -	IR	11709584:11709931-11709931:11710022-11710022:11710131	11709584:11710131	0.563	0.1632	1	0.58
CESC	TCGA-HG-A2PA-01A-11R-A213-07.cf0a3802-710c-4ec7-9778-2d8150656ab7.aligned		intron_retention_8113	FBXO2	ENSG00000116661.9	chr1 | -	IR	11709584:11709931-11709931:11710022-11710022:11710131	11709584:11710131	0.563	0.1632	1	0.58
CESC	TCGA-HM-A3JJ-01A-21R-A21T-07.4811BA43-5130-4CD4-8317-6D4495144C9E.aligned	1	intron_retention_8113	FBXO2	ENSG00000116661.9	chr1 | -	IR	11709584:11709931-11709931:11710022-11710022:11710131	11709584:11710131	0.563	0.1632	1	0.58
CESC	TCGA-HM-A3JJ-11A-12R-A21T-07.0A78E78C-F31A-488A-BF37-C47B108954FD.aligned		intron_retention_8113	FBXO2	ENSG00000116661.9	chr1 | -	IR	11709584:11709931-11709931:11710022-11710022:11710131	11709584:11710131	0.563	0.1632	1	0.58
CESC	TCGA-HM-A3JK-01A-11R-A32Y-07.beb89362-12a9-41bd-a1a2-b597138c16fb.aligned	1	intron_retention_8113	FBXO2	ENSG00000116661.9	chr1 | -	IR	11709584:11709931-11709931:11710022-11710022:11710131	11709584:11710131	0.563	0.1632	1	0.58
CESC	TCGA-HM-A4S6-01A-11R-A26T-07.a27551cc-4bbf-495c-9fc2-7cf6108ed1bf.aligned	1	intron_retention_8113	FBXO2	ENSG00000116661.9	chr1 | -	IR	11709584:11709931-11709931:11710022-11710022:11710131	11709584:11710131	0.563	0.1632	1	0.58
CESC	TCGA-HM-A6W2-01A-21R-A33Z-07.459f5e07-fffc-4f47-904b-3c51367c83f1.aligned		intron_retention_8113	FBXO2	ENSG00000116661.9	chr1 | -	IR	11709584:11709931-11709931:11710022-11710022:11710131	11709584:11710131	0.563	0.1632	1	0.58
CESC	TCGA-HM-A6W2-06A-22R-A33Z-07.386214f6-caab-4e0f-b3ed-e6103110c3bb.aligned		intron_retention_8113	FBXO2	ENSG00000116661.9	chr1 | -	IR	11709584:11709931-11709931:11710022-11710022:11710131	11709584:11710131	0.563	0.1632	1	0.58
CESC	TCGA-IR-A3L7-01A-21R-A213-07.953f918b-a82a-408f-b080-d0cb4441e1ef.aligned		intron_retention_8113	FBXO2	ENSG00000116661.9	chr1 | -	IR	11709584:11709931-11709931:11710022-11710022:11710131	11709584:11710131	0.563	0.1632	1	0.58
CESC	TCGA-IR-A3LA-01A-11R-A22U-07.249A179F-25D7-4508-B64C-BE08AAAFC82A.aligned		intron_retention_8113	FBXO2	ENSG00000116661.9	chr1 | -	IR	11709584:11709931-11709931:11710022-11710022:11710131	11709584:11710131	0.563	0.1632	1	0.58
CESC	TCGA-IR-A3LB-01A-11R-A24H-07.135d2983-9bfc-476a-8313-661f8bde6d06.aligned		intron_retention_8113	FBXO2	ENSG00000116661.9	chr1 | -	IR	11709584:11709931-11709931:11710022-11710022:11710131	11709584:11710131	0.563	0.1632	1	0.58
CESC	TCGA-IR-A3LC-01A-11R-A213-07.50b34335-7e00-417a-8e0d-c50a4384b4c9.aligned		intron_retention_8113	FBXO2	ENSG00000116661.9	chr1 | -	IR	11709584:11709931-11709931:11710022-11710022:11710131	11709584:11710131	0.563	0.1632	1	0.58
CESC	TCGA-IR-A3LF-01A-21R-A22U-07.851064C8-582A-414A-BFCC-E1042BB9FF7B.aligned		intron_retention_8113	FBXO2	ENSG00000116661.9	chr1 | -	IR	11709584:11709931-11709931:11710022-11710022:11710131	11709584:11710131	0.563	0.1632	1	0.58
CESC	TCGA-IR-A3LH-01A-21R-A213-07.2cdcd676-9056-4b42-8029-5b8dc44d3b57.aligned	0.694	intron_retention_8113	FBXO2	ENSG00000116661.9	chr1 | -	IR	11709584:11709931-11709931:11710022-11710022:11710131	11709584:11710131	0.563	0.1632	1	0.58
CESC	TCGA-IR-A3LK-01A-12R-A213-07.9fd5309d-03cc-4123-8bc8-d7dfba4955d2.aligned	0.646	intron_retention_8113	FBXO2	ENSG00000116661.9	chr1 | -	IR	11709584:11709931-11709931:11710022-11710022:11710131	11709584:11710131	0.563	0.1632	1	0.58
CESC	TCGA-JW-A5VG-01A-11R-A28H-07.40eb69ac-5c96-42c7-adfc-877580c58cc5.aligned	1	intron_retention_8113	FBXO2	ENSG00000116661.9	chr1 | -	IR	11709584:11709931-11709931:11710022-11710022:11710131	11709584:11710131	0.563	0.1632	1	0.58
CESC	TCGA-JW-A5VH-01A-11R-A28H-07.87bab535-6f15-4b0f-a274-571a4a81d1be.aligned		intron_retention_8113	FBXO2	ENSG00000116661.9	chr1 | -	IR	11709584:11709931-11709931:11710022-11710022:11710131	11709584:11710131	0.563	0.1632	1	0.58
CESC	TCGA-JW-A5VI-01A-11R-A28H-07.e5bafefb-df41-4686-9bbe-b176f954d131.aligned		intron_retention_8113	FBXO2	ENSG00000116661.9	chr1 | -	IR	11709584:11709931-11709931:11710022-11710022:11710131	11709584:11710131	0.563	0.1632	1	0.58
CESC	TCGA-JW-A5VJ-01A-11R-A28H-07.fef94ae2-4cd8-4e24-9220-3fa17ef1230a.aligned	1	intron_retention_8113	FBXO2	ENSG00000116661.9	chr1 | -	IR	11709584:11709931-11709931:11710022-11710022:11710131	11709584:11710131	0.563	0.1632	1	0.58
CESC	TCGA-JW-A5VL-01A-11R-A28H-07.bd76ebed-0575-46c8-8c8a-f02fdcffc2e9.aligned	0.744	intron_retention_8113	FBXO2	ENSG00000116661.9	chr1 | -	IR	11709584:11709931-11709931:11710022-11710022:11710131	11709584:11710131	0.563	0.1632	1	0.58
CESC	TCGA-JW-A69B-01A-11R-A32P-07.0697ab9a-88cc-4428-b02a-7666f0a772fa.aligned		intron_retention_8113	FBXO2	ENSG00000116661.9	chr1 | -	IR	11709584:11709931-11709931:11710022-11710022:11710131	11709584:11710131	0.563	0.1632	1	0.58
CESC	TCGA-JW-AAVH-01A-11R-A38B-07.ab32f0f9-4327-4189-9dd7-6951531c6e16.aligned		intron_retention_8113	FBXO2	ENSG00000116661.9	chr1 | -	IR	11709584:11709931-11709931:11710022-11710022:11710131	11709584:11710131	0.563	0.1632	1	0.58
CESC	TCGA-JX-A3PZ-01A-11R-A32Y-07.e2dbf718-1895-4749-b0aa-5fd8acc2f9bc.aligned	0.747	intron_retention_8113	FBXO2	ENSG00000116661.9	chr1 | -	IR	11709584:11709931-11709931:11710022-11710022:11710131	11709584:11710131	0.563	0.1632	1	0.58
CESC	TCGA-JX-A3Q0-01A-11R-A32Y-07.f5380a4f-3678-45b2-bfc2-5b3c0d346dcd.aligned	1	intron_retention_8113	FBXO2	ENSG00000116661.9	chr1 | -	IR	11709584:11709931-11709931:11710022-11710022:11710131	11709584:11710131	0.563	0.1632	1	0.58
CESC	TCGA-JX-A5QV-01A-22R-A28H-07.5005b96a-a215-43a0-8b55-f212891bca11.aligned	1	intron_retention_8113	FBXO2	ENSG00000116661.9	chr1 | -	IR	11709584:11709931-11709931:11710022-11710022:11710131	11709584:11710131	0.563	0.1632	1	0.58
CESC	TCGA-LP-A4AU-01A-32R-A32Y-07.9f1118f7-2469-4161-9930-58af9b633b66.aligned	1	intron_retention_8113	FBXO2	ENSG00000116661.9	chr1 | -	IR	11709584:11709931-11709931:11710022-11710022:11710131	11709584:11710131	0.563	0.1632	1	0.58
CESC	TCGA-LP-A4AW-01A-11R-A24H-07.985c5f28-72d3-49f6-bc9b-31e565b2ba7c.aligned		intron_retention_8113	FBXO2	ENSG00000116661.9	chr1 | -	IR	11709584:11709931-11709931:11710022-11710022:11710131	11709584:11710131	0.563	0.1632	1	0.58
CESC	TCGA-LP-A4AX-01A-12R-A24H-07.f7e2e36f-3018-4570-9ed2-f256048a9427.aligned	0.679	intron_retention_8113	FBXO2	ENSG00000116661.9	chr1 | -	IR	11709584:11709931-11709931:11710022-11710022:11710131	11709584:11710131	0.563	0.1632	1	0.58
CESC	TCGA-LP-A5U2-01A-11R-A28H-07.2953ceed-8418-4c63-b260-307aea1d9e63.aligned		intron_retention_8113	FBXO2	ENSG00000116661.9	chr1 | -	IR	11709584:11709931-11709931:11710022-11710022:11710131	11709584:11710131	0.563	0.1632	1	0.58
CESC	TCGA-LP-A5U3-01A-11R-A28H-07.7db85d66-16a3-4062-b98f-1ebe628d2b13.aligned		intron_retention_8113	FBXO2	ENSG00000116661.9	chr1 | -	IR	11709584:11709931-11709931:11710022-11710022:11710131	11709584:11710131	0.563	0.1632	1	0.58
CESC	TCGA-LP-A7HU-01A-11R-A33Z-07.33849579-965e-47e7-8fbe-016db46b3d77.aligned		intron_retention_8113	FBXO2	ENSG00000116661.9	chr1 | -	IR	11709584:11709931-11709931:11710022-11710022:11710131	11709584:11710131	0.563	0.1632	1	0.58
CESC	TCGA-MA-AA3W-01A-11R-A38B-07.52041760-a4d7-43e0-b2be-6b7055fe49ed.aligned	1	intron_retention_8113	FBXO2	ENSG00000116661.9	chr1 | -	IR	11709584:11709931-11709931:11710022-11710022:11710131	11709584:11710131	0.563	0.1632	1	0.58
CESC	TCGA-MA-AA3X-01A-22R-A42S-07.476a57b4-654c-48b3-929b-37996cd93f45.aligned	1	intron_retention_8113	FBXO2	ENSG00000116661.9	chr1 | -	IR	11709584:11709931-11709931:11710022-11710022:11710131	11709584:11710131	0.563	0.1632	1	0.58
CESC	TCGA-MA-AA3Y-01A-11R-A38B-07.32de6610-4b6b-443f-bd20-f67d97558cbd.aligned	0.741	intron_retention_8113	FBXO2	ENSG00000116661.9	chr1 | -	IR	11709584:11709931-11709931:11710022-11710022:11710131	11709584:11710131	0.563	0.1632	1	0.58
CESC	TCGA-MA-AA3Z-01A-11R-A38B-07.cd04ad05-2cc4-490d-b4fa-d9c5e5a118e8.aligned	1	intron_retention_8113	FBXO2	ENSG00000116661.9	chr1 | -	IR	11709584:11709931-11709931:11710022-11710022:11710131	11709584:11710131	0.563	0.1632	1	0.58
CESC	TCGA-MA-AA41-01A-11R-A38B-07.b2a62b6a-4dd4-463a-8bdb-c9fb6d09f50e.aligned		intron_retention_8113	FBXO2	ENSG00000116661.9	chr1 | -	IR	11709584:11709931-11709931:11710022-11710022:11710131	11709584:11710131	0.563	0.1632	1	0.58
CESC	TCGA-MA-AA42-01A-12R-A38B-07.4523956c-5427-45e0-a640-cc5ce875b022.aligned	1	intron_retention_8113	FBXO2	ENSG00000116661.9	chr1 | -	IR	11709584:11709931-11709931:11710022-11710022:11710131	11709584:11710131	0.563	0.1632	1	0.58
CESC	TCGA-MA-AA43-01A-11R-A42T-07.eb0b4f03-9121-4c2a-bc13-4d9109d6b894.aligned	1	intron_retention_8113	FBXO2	ENSG00000116661.9	chr1 | -	IR	11709584:11709931-11709931:11710022-11710022:11710131	11709584:11710131	0.563	0.1632	1	0.58
CESC	TCGA-MU-A51Y-01A-11R-A26T-07.e2f4f6ea-e643-421e-96ec-3618bb46b91d.aligned		intron_retention_8113	FBXO2	ENSG00000116661.9	chr1 | -	IR	11709584:11709931-11709931:11710022-11710022:11710131	11709584:11710131	0.563	0.1632	1	0.58
CESC	TCGA-MU-A5YI-01A-11R-A32P-07.736a30f9-fb53-422d-b66e-1af964011d15.aligned		intron_retention_8113	FBXO2	ENSG00000116661.9	chr1 | -	IR	11709584:11709931-11709931:11710022-11710022:11710131	11709584:11710131	0.563	0.1632	1	0.58
CESC	TCGA-MU-A8JM-01A-11R-A36F-07.78fd9869-2ed5-40a6-a846-07d5089dd810.aligned		intron_retention_8113	FBXO2	ENSG00000116661.9	chr1 | -	IR	11709584:11709931-11709931:11710022-11710022:11710131	11709584:11710131	0.563	0.1632	1	0.58
CESC	TCGA-MY-A5BD-01A-11R-A26T-07.6cf2bd67-93bd-449e-9204-5ac5f75cbfd1.aligned	1	intron_retention_8113	FBXO2	ENSG00000116661.9	chr1 | -	IR	11709584:11709931-11709931:11710022-11710022:11710131	11709584:11710131	0.563	0.1632	1	0.58
CESC	TCGA-MY-A5BF-01A-11R-A26T-07.77019674-09ef-416d-a02a-8135b048af91.aligned	0.691	intron_retention_8113	FBXO2	ENSG00000116661.9	chr1 | -	IR	11709584:11709931-11709931:11710022-11710022:11710131	11709584:11710131	0.563	0.1632	1	0.58
CESC	TCGA-MY-A913-01A-11R-A37O-07.4b1da384-ab8a-4c6f-a76a-54ddc5314594.aligned	0.659	intron_retention_8113	FBXO2	ENSG00000116661.9	chr1 | -	IR	11709584:11709931-11709931:11710022-11710022:11710131	11709584:11710131	0.563	0.1632	1	0.58
CESC	TCGA-PN-A8MA-01A-11R-A36F-07.fa2cdebd-8b7c-452a-8191-994ceeb1e763.aligned		intron_retention_8113	FBXO2	ENSG00000116661.9	chr1 | -	IR	11709584:11709931-11709931:11710022-11710022:11710131	11709584:11710131	0.563	0.1632	1	0.58
CESC	TCGA-Q1-A5R1-01A-11R-A28H-07.ca1c37f0-52c9-4702-87ea-1a81a09c12e8.aligned	1	intron_retention_8113	FBXO2	ENSG00000116661.9	chr1 | -	IR	11709584:11709931-11709931:11710022-11710022:11710131	11709584:11710131	0.563	0.1632	1	0.58
CESC	TCGA-Q1-A6DT-01A-11R-A32P-07.a11fe2cb-92b2-463c-873c-b179e1d352cd.aligned	1	intron_retention_8113	FBXO2	ENSG00000116661.9	chr1 | -	IR	11709584:11709931-11709931:11710022-11710022:11710131	11709584:11710131	0.563	0.1632	1	0.58
CESC	TCGA-Q1-A6DV-01A-11R-A32P-07.432d3081-de85-448f-8499-2446b25af20c.aligned		intron_retention_8113	FBXO2	ENSG00000116661.9	chr1 | -	IR	11709584:11709931-11709931:11710022-11710022:11710131	11709584:11710131	0.563	0.1632	1	0.58
CESC	TCGA-Q1-A6DW-01A-11R-A32P-07.c564836c-e7fd-48cc-8896-7d18028039f7.aligned		intron_retention_8113	FBXO2	ENSG00000116661.9	chr1 | -	IR	11709584:11709931-11709931:11710022-11710022:11710131	11709584:11710131	0.563	0.1632	1	0.58
CESC	TCGA-Q1-A73O-01A-11R-A32P-07.48ad4bbc-d720-43da-98a8-e002c69ff5aa.aligned	1	intron_retention_8113	FBXO2	ENSG00000116661.9	chr1 | -	IR	11709584:11709931-11709931:11710022-11710022:11710131	11709584:11710131	0.563	0.1632	1	0.58
CESC	TCGA-Q1-A73P-01A-11R-A32P-07.265dd9bb-8b5e-4cad-a43e-f21ae0953f22.aligned		intron_retention_8113	FBXO2	ENSG00000116661.9	chr1 | -	IR	11709584:11709931-11709931:11710022-11710022:11710131	11709584:11710131	0.563	0.1632	1	0.58
CESC	TCGA-Q1-A73Q-01A-21R-A32P-07.c7f8cb76-3d15-41f0-8217-908db558eedc.aligned		intron_retention_8113	FBXO2	ENSG00000116661.9	chr1 | -	IR	11709584:11709931-11709931:11710022-11710022:11710131	11709584:11710131	0.563	0.1632	1	0.58
CESC	TCGA-Q1-A73R-01A-11R-A33Z-07.a661f07b-e207-4221-b9f2-a5704be3650b.aligned		intron_retention_8113	FBXO2	ENSG00000116661.9	chr1 | -	IR	11709584:11709931-11709931:11710022-11710022:11710131	11709584:11710131	0.563	0.1632	1	0.58
CESC	TCGA-Q1-A73S-01A-11R-A33Z-07.22cc3ede-a5d9-4ac0-9c4d-0a7f12d6bc20.aligned	1	intron_retention_8113	FBXO2	ENSG00000116661.9	chr1 | -	IR	11709584:11709931-11709931:11710022-11710022:11710131	11709584:11710131	0.563	0.1632	1	0.58
CESC	TCGA-RA-A741-01A-11R-A33Z-07.58e01e27-fe36-4ee7-9560-f668bf6dcb48.aligned	1	intron_retention_8113	FBXO2	ENSG00000116661.9	chr1 | -	IR	11709584:11709931-11709931:11710022-11710022:11710131	11709584:11710131	0.563	0.1632	1	0.58
CESC	TCGA-UC-A7PD-01A-11R-A352-07.be979660-2d11-4707-9c74-b1222c7cb56e.aligned	1	intron_retention_8113	FBXO2	ENSG00000116661.9	chr1 | -	IR	11709584:11709931-11709931:11710022-11710022:11710131	11709584:11710131	0.563	0.1632	1	0.58
CESC	TCGA-UC-A7PF-01A-11R-A352-07.abb75efe-7d8f-4d43-a04b-8a97f2eda7b8.aligned		intron_retention_8113	FBXO2	ENSG00000116661.9	chr1 | -	IR	11709584:11709931-11709931:11710022-11710022:11710131	11709584:11710131	0.563	0.1632	1	0.58
CESC	TCGA-UC-A7PG-01A-11R-A42S-07.13b94e1c-6bd0-420f-bf57-c14c91e8f28e.aligned		intron_retention_8113	FBXO2	ENSG00000116661.9	chr1 | -	IR	11709584:11709931-11709931:11710022-11710022:11710131	11709584:11710131	0.563	0.1632	1	0.58
CESC	TCGA-UC-A7PG-06A-11R-A42S-07.22727b4c-d2ab-4ebf-a681-d2dd20eb4f43.aligned		intron_retention_8113	FBXO2	ENSG00000116661.9	chr1 | -	IR	11709584:11709931-11709931:11710022-11710022:11710131	11709584:11710131	0.563	0.1632	1	0.58
CESC	TCGA-UC-A7PI-01A-11R-A42S-07.110bcd0d-95b5-4387-bfa3-837fbde32085.aligned		intron_retention_8113	FBXO2	ENSG00000116661.9	chr1 | -	IR	11709584:11709931-11709931:11710022-11710022:11710131	11709584:11710131	0.563	0.1632	1	0.58
CESC	TCGA-VS-A8EB-01A-11R-A36F-07.69e3b16b-5515-416b-808a-0321a107e5c0.aligned	0.489	intron_retention_8113	FBXO2	ENSG00000116661.9	chr1 | -	IR	11709584:11709931-11709931:11710022-11710022:11710131	11709584:11710131	0.563	0.1632	1	0.58
CESC	TCGA-VS-A8EC-01A-11R-A36F-07.f00b3401-8432-4748-8d19-267e945cd3c0.aligned		intron_retention_8113	FBXO2	ENSG00000116661.9	chr1 | -	IR	11709584:11709931-11709931:11710022-11710022:11710131	11709584:11710131	0.563	0.1632	1	0.58
CESC	TCGA-VS-A8EG-01A-11R-A36F-07.aa91c19b-008d-497a-8121-a06cf9dc7b29.aligned	0.634	intron_retention_8113	FBXO2	ENSG00000116661.9	chr1 | -	IR	11709584:11709931-11709931:11710022-11710022:11710131	11709584:11710131	0.563	0.1632	1	0.58
CESC	TCGA-VS-A8EH-01A-11R-A36F-07.9b04a1e0-7ccd-4695-ac3f-df8b3b320f5a.aligned	1	intron_retention_8113	FBXO2	ENSG00000116661.9	chr1 | -	IR	11709584:11709931-11709931:11710022-11710022:11710131	11709584:11710131	0.563	0.1632	1	0.58
CESC	TCGA-VS-A8EI-01A-11R-A37O-07.a32d716b-4fc9-4451-9106-b4c7cda9bfc1.aligned	0.707	intron_retention_8113	FBXO2	ENSG00000116661.9	chr1 | -	IR	11709584:11709931-11709931:11710022-11710022:11710131	11709584:11710131	0.563	0.1632	1	0.58
CESC	TCGA-VS-A8EJ-01A-11R-A37O-07.fc6c05b9-e904-4c4e-b26a-65b4ac455cf1.aligned	1	intron_retention_8113	FBXO2	ENSG00000116661.9	chr1 | -	IR	11709584:11709931-11709931:11710022-11710022:11710131	11709584:11710131	0.563	0.1632	1	0.58
CESC	TCGA-VS-A8EK-01A-12R-A37O-07.8d5e2fac-878b-440c-a19b-09c972b840ac.aligned		intron_retention_8113	FBXO2	ENSG00000116661.9	chr1 | -	IR	11709584:11709931-11709931:11710022-11710022:11710131	11709584:11710131	0.563	0.1632	1	0.58
CESC	TCGA-VS-A8EL-01A-11R-A37O-07.79a31785-793f-4878-8c09-64c8fb0c53e3.aligned		intron_retention_8113	FBXO2	ENSG00000116661.9	chr1 | -	IR	11709584:11709931-11709931:11710022-11710022:11710131	11709584:11710131	0.563	0.1632	1	0.58
CESC	TCGA-VS-A8Q8-01A-11R-A37O-07.4601c9ab-da58-46f4-a875-5ef03727b756.aligned	0.763	intron_retention_8113	FBXO2	ENSG00000116661.9	chr1 | -	IR	11709584:11709931-11709931:11710022-11710022:11710131	11709584:11710131	0.563	0.1632	1	0.58
CESC	TCGA-VS-A8Q9-01A-12R-A37O-07.c43ed784-3bfe-4485-8dd9-cee08f8c0fa8.aligned	1	intron_retention_8113	FBXO2	ENSG00000116661.9	chr1 | -	IR	11709584:11709931-11709931:11710022-11710022:11710131	11709584:11710131	0.563	0.1632	1	0.58
CESC	TCGA-VS-A8QA-01A-11R-A37O-07.ca559bd7-454b-463c-9751-1f772f738599.aligned	0.719	intron_retention_8113	FBXO2	ENSG00000116661.9	chr1 | -	IR	11709584:11709931-11709931:11710022-11710022:11710131	11709584:11710131	0.563	0.1632	1	0.58
CESC	TCGA-VS-A8QC-01A-11R-A37O-07.cad09fcd-1d43-4fb4-8d65-6f52c9a17d86.aligned	0.731	intron_retention_8113	FBXO2	ENSG00000116661.9	chr1 | -	IR	11709584:11709931-11709931:11710022-11710022:11710131	11709584:11710131	0.563	0.1632	1	0.58
CESC	TCGA-VS-A8QF-01A-21R-A37O-07.151ea5c1-80f3-473f-af58-f43df84879f2.aligned		intron_retention_8113	FBXO2	ENSG00000116661.9	chr1 | -	IR	11709584:11709931-11709931:11710022-11710022:11710131	11709584:11710131	0.563	0.1632	1	0.58
CESC	TCGA-VS-A8QH-01A-11R-A37O-07.b21b7604-5292-4f80-b0d9-8a99b9c0c1a6.aligned		intron_retention_8113	FBXO2	ENSG00000116661.9	chr1 | -	IR	11709584:11709931-11709931:11710022-11710022:11710131	11709584:11710131	0.563	0.1632	1	0.58
CESC	TCGA-VS-A8QM-01A-11R-A37O-07.babc730d-6170-4503-8502-d794575fe993.aligned	1	intron_retention_8113	FBXO2	ENSG00000116661.9	chr1 | -	IR	11709584:11709931-11709931:11710022-11710022:11710131	11709584:11710131	0.563	0.1632	1	0.58
CESC	TCGA-VS-A94W-01A-12R-A37O-07.f99240d0-32ea-438a-b350-862202b18a30.aligned	0.736	intron_retention_8113	FBXO2	ENSG00000116661.9	chr1 | -	IR	11709584:11709931-11709931:11710022-11710022:11710131	11709584:11710131	0.563	0.1632	1	0.58
CESC	TCGA-VS-A94X-01A-11R-A38B-07.7626194c-9fc3-4b7f-a759-2834583f3890.aligned	1	intron_retention_8113	FBXO2	ENSG00000116661.9	chr1 | -	IR	11709584:11709931-11709931:11710022-11710022:11710131	11709584:11710131	0.563	0.1632	1	0.58
CESC	TCGA-VS-A94Y-01A-11R-A38B-07.b52d5d7a-3104-4d2a-a36b-aa9ac75e341d.aligned	1	intron_retention_8113	FBXO2	ENSG00000116661.9	chr1 | -	IR	11709584:11709931-11709931:11710022-11710022:11710131	11709584:11710131	0.563	0.1632	1	0.58
CESC	TCGA-VS-A94Z-01A-11R-A38B-07.c2ce929e-e3a1-4a3a-b09e-9aff5bfd95f4.aligned		intron_retention_8113	FBXO2	ENSG00000116661.9	chr1 | -	IR	11709584:11709931-11709931:11710022-11710022:11710131	11709584:11710131	0.563	0.1632	1	0.58
CESC	TCGA-VS-A950-01A-11R-A42T-07.1560b26a-bc8d-4bdd-b317-f04b66c2ce5b.aligned	1	intron_retention_8113	FBXO2	ENSG00000116661.9	chr1 | -	IR	11709584:11709931-11709931:11710022-11710022:11710131	11709584:11710131	0.563	0.1632	1	0.58
CESC	TCGA-VS-A952-01A-11R-A38B-07.01a6c838-ea9c-488c-8dcb-8bac73253a33.aligned		intron_retention_8113	FBXO2	ENSG00000116661.9	chr1 | -	IR	11709584:11709931-11709931:11710022-11710022:11710131	11709584:11710131	0.563	0.1632	1	0.58
CESC	TCGA-VS-A953-01A-11R-A38B-07.1893be96-6727-4bfa-aa28-2a2df326c464.aligned		intron_retention_8113	FBXO2	ENSG00000116661.9	chr1 | -	IR	11709584:11709931-11709931:11710022-11710022:11710131	11709584:11710131	0.563	0.1632	1	0.58
CESC	TCGA-VS-A954-01A-11R-A38B-07.01ab5f23-487f-4a57-97b3-6a110a789124.aligned	1	intron_retention_8113	FBXO2	ENSG00000116661.9	chr1 | -	IR	11709584:11709931-11709931:11710022-11710022:11710131	11709584:11710131	0.563	0.1632	1	0.58
CESC	TCGA-VS-A957-01A-11R-A42T-07.78879d70-1eb8-4677-869c-a4c51e537062.aligned		intron_retention_8113	FBXO2	ENSG00000116661.9	chr1 | -	IR	11709584:11709931-11709931:11710022-11710022:11710131	11709584:11710131	0.563	0.1632	1	0.58
CESC	TCGA-VS-A958-01A-11R-A42T-07.5fd1a695-76a4-4ccb-8623-6b1e65e7de3a.aligned	1	intron_retention_8113	FBXO2	ENSG00000116661.9	chr1 | -	IR	11709584:11709931-11709931:11710022-11710022:11710131	11709584:11710131	0.563	0.1632	1	0.58
CESC	TCGA-VS-A959-01A-11R-A42T-07.33be2852-1252-432d-9f4e-2d0749f2563a.aligned	1	intron_retention_8113	FBXO2	ENSG00000116661.9	chr1 | -	IR	11709584:11709931-11709931:11710022-11710022:11710131	11709584:11710131	0.563	0.1632	1	0.58
CESC	TCGA-VS-A9U5-01A-11R-A42T-07.e5241411-aec5-4822-8522-8e74c51a0d79.aligned		intron_retention_8113	FBXO2	ENSG00000116661.9	chr1 | -	IR	11709584:11709931-11709931:11710022-11710022:11710131	11709584:11710131	0.563	0.1632	1	0.58
CESC	TCGA-VS-A9U6-01A-11R-A42T-07.625af8d9-87a0-4017-833b-962fad1f79e5.aligned	1	intron_retention_8113	FBXO2	ENSG00000116661.9	chr1 | -	IR	11709584:11709931-11709931:11710022-11710022:11710131	11709584:11710131	0.563	0.1632	1	0.58
CESC	TCGA-VS-A9U7-01A-11R-A42T-07.78f72cda-30eb-41f6-8713-795ced251abb.aligned	0.741	intron_retention_8113	FBXO2	ENSG00000116661.9	chr1 | -	IR	11709584:11709931-11709931:11710022-11710022:11710131	11709584:11710131	0.563	0.1632	1	0.58
CESC	TCGA-VS-A9UB-01A-22R-A42T-07.389eb99b-53c7-41dd-8ce3-f3d8d70a1e7a.aligned	0.601	intron_retention_8113	FBXO2	ENSG00000116661.9	chr1 | -	IR	11709584:11709931-11709931:11710022-11710022:11710131	11709584:11710131	0.563	0.1632	1	0.58
CESC	TCGA-VS-A9UC-01A-11R-A42T-07.c9b500aa-3196-4dc2-8580-8696b6c52c4d.aligned	0.654	intron_retention_8113	FBXO2	ENSG00000116661.9	chr1 | -	IR	11709584:11709931-11709931:11710022-11710022:11710131	11709584:11710131	0.563	0.1632	1	0.58
CESC	TCGA-VS-A9UH-01A-11R-A42T-07.2410b783-e6c3-4c07-b944-8818d0b0cacb.aligned	1	intron_retention_8113	FBXO2	ENSG00000116661.9	chr1 | -	IR	11709584:11709931-11709931:11710022-11710022:11710131	11709584:11710131	0.563	0.1632	1	0.58
CESC	TCGA-VS-A9UI-01A-11R-A42T-07.66a29b88-60e4-4fae-90b3-5c32560dd3ba.aligned	1	intron_retention_8113	FBXO2	ENSG00000116661.9	chr1 | -	IR	11709584:11709931-11709931:11710022-11710022:11710131	11709584:11710131	0.563	0.1632	1	0.58
CESC	TCGA-VS-A9UJ-01A-11R-A42T-07.9817f939-fcd5-4130-986b-95228c78e17d.aligned		intron_retention_8113	FBXO2	ENSG00000116661.9	chr1 | -	IR	11709584:11709931-11709931:11710022-11710022:11710131	11709584:11710131	0.563	0.1632	1	0.58
CESC	TCGA-VS-A9UL-01A-11R-A42T-07.4749bc16-8e1b-4e8e-b975-f07fd2ae885e.aligned		intron_retention_8113	FBXO2	ENSG00000116661.9	chr1 | -	IR	11709584:11709931-11709931:11710022-11710022:11710131	11709584:11710131	0.563	0.1632	1	0.58
CESC	TCGA-VS-A9UM-01A-11R-A42T-07.d8259ddb-5f41-43ea-889c-1e7dba9d32bc.aligned		intron_retention_8113	FBXO2	ENSG00000116661.9	chr1 | -	IR	11709584:11709931-11709931:11710022-11710022:11710131	11709584:11710131	0.563	0.1632	1	0.58
CESC	TCGA-VS-A9UO-01A-11R-A42T-07.b4df19ac-b93c-4de6-b0f6-823bca30b1d7.aligned	0.677	intron_retention_8113	FBXO2	ENSG00000116661.9	chr1 | -	IR	11709584:11709931-11709931:11710022-11710022:11710131	11709584:11710131	0.563	0.1632	1	0.58
CESC	TCGA-VS-A9UP-01A-11R-A42T-07.b1e7db92-7dd8-4bf1-b6cf-649df1bb96bd.aligned	1	intron_retention_8113	FBXO2	ENSG00000116661.9	chr1 | -	IR	11709584:11709931-11709931:11710022-11710022:11710131	11709584:11710131	0.563	0.1632	1	0.58
CESC	TCGA-VS-A9UQ-01A-21R-A42T-07.57955c20-b0c4-4d4c-aea6-cee9179a4118.aligned		intron_retention_8113	FBXO2	ENSG00000116661.9	chr1 | -	IR	11709584:11709931-11709931:11710022-11710022:11710131	11709584:11710131	0.563	0.1632	1	0.58
CESC	TCGA-VS-A9UR-01A-11R-A42T-07.c4ffa8ae-421e-4259-b3ec-ee69fc94fc1a.aligned	1	intron_retention_8113	FBXO2	ENSG00000116661.9	chr1 | -	IR	11709584:11709931-11709931:11710022-11710022:11710131	11709584:11710131	0.563	0.1632	1	0.58
CESC	TCGA-VS-A9UT-01A-11R-A42T-07.541b5a26-2819-4cab-bbc7-e88df4999681.aligned	1	intron_retention_8113	FBXO2	ENSG00000116661.9	chr1 | -	IR	11709584:11709931-11709931:11710022-11710022:11710131	11709584:11710131	0.563	0.1632	1	0.58
CESC	TCGA-VS-A9UU-01A-11R-A42T-07.ab8b70eb-04a6-4c52-8301-fa904fa5870a.aligned		intron_retention_8113	FBXO2	ENSG00000116661.9	chr1 | -	IR	11709584:11709931-11709931:11710022-11710022:11710131	11709584:11710131	0.563	0.1632	1	0.58
CESC	TCGA-VS-A9UV-01A-11R-A42T-07.2f48ea8f-6e03-4f00-acc5-e9bc491ad673.aligned		intron_retention_8113	FBXO2	ENSG00000116661.9	chr1 | -	IR	11709584:11709931-11709931:11710022-11710022:11710131	11709584:11710131	0.563	0.1632	1	0.58
CESC	TCGA-VS-A9UY-01A-11R-A42T-07.df428368-b3b0-4e70-b930-2e143645a779.aligned		intron_retention_8113	FBXO2	ENSG00000116661.9	chr1 | -	IR	11709584:11709931-11709931:11710022-11710022:11710131	11709584:11710131	0.563	0.1632	1	0.58
CESC	TCGA-VS-A9UZ-01A-11R-A42T-07.56ec376d-abc2-4bcd-87d2-cf10141ab979.aligned	0.589	intron_retention_8113	FBXO2	ENSG00000116661.9	chr1 | -	IR	11709584:11709931-11709931:11710022-11710022:11710131	11709584:11710131	0.563	0.1632	1	0.58
CESC	TCGA-VS-A9V0-01A-11R-A42T-07.b6c90737-2ec8-46e6-801a-7e64ba2b5b0b.aligned		intron_retention_8113	FBXO2	ENSG00000116661.9	chr1 | -	IR	11709584:11709931-11709931:11710022-11710022:11710131	11709584:11710131	0.563	0.1632	1	0.58
CESC	TCGA-VS-A9V1-01A-11R-A42T-07.7d481f46-fd01-47ce-b321-39240129af48.aligned		intron_retention_8113	FBXO2	ENSG00000116661.9	chr1 | -	IR	11709584:11709931-11709931:11710022-11710022:11710131	11709584:11710131	0.563	0.1632	1	0.58
CESC	TCGA-VS-A9V2-01A-11R-A42T-07.8cdfa086-9681-4b94-98c7-855d713cd877.aligned		intron_retention_8113	FBXO2	ENSG00000116661.9	chr1 | -	IR	11709584:11709931-11709931:11710022-11710022:11710131	11709584:11710131	0.563	0.1632	1	0.58
CESC	TCGA-VS-A9V3-01A-11R-A42T-07.11c5127d-0115-4149-8304-1556e175d0ba.aligned		intron_retention_8113	FBXO2	ENSG00000116661.9	chr1 | -	IR	11709584:11709931-11709931:11710022-11710022:11710131	11709584:11710131	0.563	0.1632	1	0.58
CESC	TCGA-VS-A9V4-01A-12R-A42T-07.a4e4724d-bd99-4c46-9130-e34a89c3ef7b.aligned		intron_retention_8113	FBXO2	ENSG00000116661.9	chr1 | -	IR	11709584:11709931-11709931:11710022-11710022:11710131	11709584:11710131	0.563	0.1632	1	0.58
CESC	TCGA-VS-A9V5-01A-11R-A42T-07.288f90b8-5be8-4077-b578-62b80b14f0c0.aligned		intron_retention_8113	FBXO2	ENSG00000116661.9	chr1 | -	IR	11709584:11709931-11709931:11710022-11710022:11710131	11709584:11710131	0.563	0.1632	1	0.58
CESC	TCGA-VS-AA62-01A-11R-A42T-07.be0d33e0-2aa6-48bb-b8e3-69259e28f8e3.aligned	1	intron_retention_8113	FBXO2	ENSG00000116661.9	chr1 | -	IR	11709584:11709931-11709931:11710022-11710022:11710131	11709584:11710131	0.563	0.1632	1	0.58
CESC	TCGA-WL-A834-01A-11R-A352-07.0d138b3f-4212-47cf-a65e-fc1cbf618e99.aligned		intron_retention_8113	FBXO2	ENSG00000116661.9	chr1 | -	IR	11709584:11709931-11709931:11710022-11710022:11710131	11709584:11710131	0.563	0.1632	1	0.58
CESC	TCGA-XS-A8TJ-01A-11R-A36F-07.7f3a2afd-ef8e-4035-8fec-8dab2b53672c.aligned		intron_retention_8113	FBXO2	ENSG00000116661.9	chr1 | -	IR	11709584:11709931-11709931:11710022-11710022:11710131	11709584:11710131	0.563	0.1632	1	0.58
CESC	TCGA-ZJ-A8QO-01A-11R-A37O-07.acb24854-1e1a-4de8-a52f-f0c742cb82a1.aligned	1	intron_retention_8113	FBXO2	ENSG00000116661.9	chr1 | -	IR	11709584:11709931-11709931:11710022-11710022:11710131	11709584:11710131	0.563	0.1632	1	0.58
CESC	TCGA-ZJ-A8QQ-01A-11R-A37O-07.aefd1510-484d-43c7-ab67-931b1e7406fa.aligned	1	intron_retention_8113	FBXO2	ENSG00000116661.9	chr1 | -	IR	11709584:11709931-11709931:11710022-11710022:11710131	11709584:11710131	0.563	0.1632	1	0.58
CESC	TCGA-ZJ-A8QR-01A-11R-A37O-07.5ad0c6f5-9be9-46f2-a705-fb9c616464ae.aligned	1	intron_retention_8113	FBXO2	ENSG00000116661.9	chr1 | -	IR	11709584:11709931-11709931:11710022-11710022:11710131	11709584:11710131	0.563	0.1632	1	0.58
CESC	TCGA-ZJ-AAX4-01A-11R-A42T-07.cc3f9a0e-0984-42dc-82bd-965f0c2b6109.aligned		intron_retention_8113	FBXO2	ENSG00000116661.9	chr1 | -	IR	11709584:11709931-11709931:11710022-11710022:11710131	11709584:11710131	0.563	0.1632	1	0.58
CESC	TCGA-ZJ-AAX8-01A-11R-A42T-07.1f431436-f6bd-4f64-81ad-820e11385e94.aligned	1	intron_retention_8113	FBXO2	ENSG00000116661.9	chr1 | -	IR	11709584:11709931-11709931:11710022-11710022:11710131	11709584:11710131	0.563	0.1632	1	0.58
CESC	TCGA-ZJ-AAXA-01A-11R-A42T-07.38d23f3a-0380-4759-930f-bdcb89a4eafe.aligned	0.485	intron_retention_8113	FBXO2	ENSG00000116661.9	chr1 | -	IR	11709584:11709931-11709931:11710022-11710022:11710131	11709584:11710131	0.563	0.1632	1	0.58
CESC	TCGA-ZJ-AAXD-01A-21R-A42T-07.fc9e612c-8909-47de-b6f0-8691d5bc67c5.aligned	0.472	intron_retention_8113	FBXO2	ENSG00000116661.9	chr1 | -	IR	11709584:11709931-11709931:11710022-11710022:11710131	11709584:11710131	0.563	0.1632	1	0.58
CESC	TCGA-ZJ-AAXF-01A-31R-A42T-07.48e0ecf3-3c7a-4d6a-b77c-51f3c65e4834.aligned	1	intron_retention_8113	FBXO2	ENSG00000116661.9	chr1 | -	IR	11709584:11709931-11709931:11710022-11710022:11710131	11709584:11710131	0.563	0.1632	1	0.58
CESC	TCGA-ZJ-AAXN-01A-11R-A42T-07.878b8551-fb42-48bc-9403-178c568372cd.aligned	0.605	intron_retention_8113	FBXO2	ENSG00000116661.9	chr1 | -	IR	11709584:11709931-11709931:11710022-11710022:11710131	11709584:11710131	0.563	0.1632	1	0.58
CESC	TCGA-ZJ-AAXT-01A-11R-A42T-07.2e6fd34c-eccc-42a2-a806-bf69f55c0b27.aligned	1	intron_retention_8113	FBXO2	ENSG00000116661.9	chr1 | -	IR	11709584:11709931-11709931:11710022-11710022:11710131	11709584:11710131	0.563	0.1632	1	0.58
CESC	TCGA-ZJ-AAXU-01A-11R-A42T-07.39dc6ace-24eb-499b-ad94-64cf08849087.aligned	0.705	intron_retention_8113	FBXO2	ENSG00000116661.9	chr1 | -	IR	11709584:11709931-11709931:11710022-11710022:11710131	11709584:11710131	0.563	0.1632	1	0.58
CESC	TCGA-ZJ-AB0H-01A-11R-A42T-07.ad34a739-074f-4463-b053-d1368c4d34db.aligned		intron_retention_8113	FBXO2	ENSG00000116661.9	chr1 | -	IR	11709584:11709931-11709931:11710022-11710022:11710131	11709584:11710131	0.563	0.1632	1	0.58
CESC	TCGA-ZJ-AB0I-01A-11R-A42T-07.f77f995c-4e18-4803-a703-8f3aee49837b.aligned	1	intron_retention_8113	FBXO2	ENSG00000116661.9	chr1 | -	IR	11709584:11709931-11709931:11710022-11710022:11710131	11709584:11710131	0.563	0.1632	1	0.58
CESC	TCGA-ZX-AA5X-01A-11R-A42T-07.212eae3c-4ad5-48e0-90af-b6fe1dfc5554.aligned		intron_retention_8113	FBXO2	ENSG00000116661.9	chr1 | -	IR	11709584:11709931-11709931:11710022-11710022:11710131	11709584:11710131	0.563	0.1632	1	0.58
COAD	TCGA-3L-AA1B-01A-11R-A37K-07.58746677-c72b-4f75-bf2b-d4428d58aec5.aligned		intron_retention_8113	FBXO2	ENSG00000116661.9	chr1 | -	IR	11709584:11709931-11709931:11710022-11710022:11710131	11709584:11710131	0.169	0.1458	1	0.586
COAD	TCGA-4N-A93T-01A-11R-A37K-07.a07d6a16-b755-4bfb-a982-eb5906cdc0f6.aligned	1	intron_retention_8113	FBXO2	ENSG00000116661.9	chr1 | -	IR	11709584:11709931-11709931:11710022-11710022:11710131	11709584:11710131	0.169	0.1458	1	0.586
COAD	TCGA-4T-AA8H-01A-11R-A41B-07.16689efe-1dcc-46f8-9c81-c8d7d81306a6.aligned		intron_retention_8113	FBXO2	ENSG00000116661.9	chr1 | -	IR	11709584:11709931-11709931:11710022-11710022:11710131	11709584:11710131	0.169	0.1458	1	0.586
COAD	TCGA-5M-AAT4-01A-11R-A41B-07.7d32ee7b-77a7-4c50-923f-a870221640e5.aligned	1	intron_retention_8113	FBXO2	ENSG00000116661.9	chr1 | -	IR	11709584:11709931-11709931:11710022-11710022:11710131	11709584:11710131	0.169	0.1458	1	0.586
COAD	TCGA-5M-AAT5-01A-21R-A41B-07.66ea9a6e-0bfa-4eab-a96d-a8982d433d9c.aligned		intron_retention_8113	FBXO2	ENSG00000116661.9	chr1 | -	IR	11709584:11709931-11709931:11710022-11710022:11710131	11709584:11710131	0.169	0.1458	1	0.586
COAD	TCGA-5M-AAT6-01A-11R-A41B-07.1f6f9954-19da-47bd-89c2-b0701871575e.aligned		intron_retention_8113	FBXO2	ENSG00000116661.9	chr1 | -	IR	11709584:11709931-11709931:11710022-11710022:11710131	11709584:11710131	0.169	0.1458	1	0.586
COAD	TCGA-5M-AATA-01A-31R-A41B-07.681e8dff-28d1-4269-a4d2-f4446e67c4ba.aligned	1	intron_retention_8113	FBXO2	ENSG00000116661.9	chr1 | -	IR	11709584:11709931-11709931:11710022-11710022:11710131	11709584:11710131	0.169	0.1458	1	0.586
COAD	TCGA-5M-AATE-01A-11R-A41B-07.fa58821e-b6a7-4d83-be93-b1ae5a382824.aligned	1	intron_retention_8113	FBXO2	ENSG00000116661.9	chr1 | -	IR	11709584:11709931-11709931:11710022-11710022:11710131	11709584:11710131	0.169	0.1458	1	0.586
COAD	TCGA-A6-2671-11A-01R-A32Z-07.b8290920-9642-4137-ad13-88590a6694e8.aligned		intron_retention_8113	FBXO2	ENSG00000116661.9	chr1 | -	IR	11709584:11709931-11709931:11710022-11710022:11710131	11709584:11710131	0.169	0.1458	1	0.586
COAD	TCGA-A6-2672-01B-03R-2302-07.dcc36700-cd11-4235-a1a7-960c93fd88a8.aligned		intron_retention_8113	FBXO2	ENSG00000116661.9	chr1 | -	IR	11709584:11709931-11709931:11710022-11710022:11710131	11709584:11710131	0.169	0.1458	1	0.586
COAD	TCGA-A6-2674-01A-02R-A278-07.d339980f-bcc9-4e22-8059-75a74e690744.aligned		intron_retention_8113	FBXO2	ENSG00000116661.9	chr1 | -	IR	11709584:11709931-11709931:11710022-11710022:11710131	11709584:11710131	0.169	0.1458	1	0.586
COAD	TCGA-A6-2675-01A-02R-1723-07.1493b166-ffc2-4689-8b77-a8b972b6dbc0.aligned		intron_retention_8113	FBXO2	ENSG00000116661.9	chr1 | -	IR	11709584:11709931-11709931:11710022-11710022:11710131	11709584:11710131	0.169	0.1458	1	0.586
COAD	TCGA-A6-2675-11A-01R-1723-07.2fd204da-a117-4329-a2f3-41bc869b1ee1.aligned		intron_retention_8113	FBXO2	ENSG00000116661.9	chr1 | -	IR	11709584:11709931-11709931:11710022-11710022:11710131	11709584:11710131	0.169	0.1458	1	0.586
COAD	TCGA-A6-2678-11A-01R-A32Z-07.f0c640c5-2779-4d91-8244-9d2d39d83790.aligned		intron_retention_8113	FBXO2	ENSG00000116661.9	chr1 | -	IR	11709584:11709931-11709931:11710022-11710022:11710131	11709584:11710131	0.169	0.1458	1	0.586
COAD	TCGA-A6-2679-11A-01R-A32Z-07.a7f46d1b-b6f3-4b3e-a5aa-12eddaf26a44.aligned		intron_retention_8113	FBXO2	ENSG00000116661.9	chr1 | -	IR	11709584:11709931-11709931:11710022-11710022:11710131	11709584:11710131	0.169	0.1458	1	0.586
COAD	TCGA-A6-2680-11A-01R-A32Z-07.83393025-bd1c-430a-8438-fe8e79ae9dc5.aligned		intron_retention_8113	FBXO2	ENSG00000116661.9	chr1 | -	IR	11709584:11709931-11709931:11710022-11710022:11710131	11709584:11710131	0.169	0.1458	1	0.586
COAD	TCGA-A6-2682-11A-01R-A32Z-07.98270d92-be35-42c5-86fa-371dacb19331.aligned		intron_retention_8113	FBXO2	ENSG00000116661.9	chr1 | -	IR	11709584:11709931-11709931:11710022-11710022:11710131	11709584:11710131	0.169	0.1458	1	0.586
COAD	TCGA-A6-2683-11A-01R-A32Z-07.1fc1f310-7d16-4c24-b9bb-ff9c0a394e26.aligned		intron_retention_8113	FBXO2	ENSG00000116661.9	chr1 | -	IR	11709584:11709931-11709931:11710022-11710022:11710131	11709584:11710131	0.169	0.1458	1	0.586
COAD	TCGA-A6-2684-01A-01R-A278-07.d517fd04-2868-4d22-a0d6-cfe81e885601.aligned		intron_retention_8113	FBXO2	ENSG00000116661.9	chr1 | -	IR	11709584:11709931-11709931:11710022-11710022:11710131	11709584:11710131	0.169	0.1458	1	0.586
COAD	TCGA-A6-2684-11A-01R-A32Z-07.47adb423-3e97-4d73-86ab-3daafc157f5f.aligned		intron_retention_8113	FBXO2	ENSG00000116661.9	chr1 | -	IR	11709584:11709931-11709931:11710022-11710022:11710131	11709584:11710131	0.169	0.1458	1	0.586
COAD	TCGA-A6-2685-11A-01R-A32Z-07.16cdf5cd-439a-4b8a-b1b5-9887c910cdc1.aligned		intron_retention_8113	FBXO2	ENSG00000116661.9	chr1 | -	IR	11709584:11709931-11709931:11710022-11710022:11710131	11709584:11710131	0.169	0.1458	1	0.586
COAD	TCGA-A6-2686-01A-01R-A32Z-07.5b345610-029c-40b8-b39a-7d6657a6866e.aligned		intron_retention_8113	FBXO2	ENSG00000116661.9	chr1 | -	IR	11709584:11709931-11709931:11710022-11710022:11710131	11709584:11710131	0.169	0.1458	1	0.586
COAD	TCGA-A6-2686-11A-01R-A32Z-07.b2a99408-7ba1-40d7-8338-dc8c07d65aef.aligned		intron_retention_8113	FBXO2	ENSG00000116661.9	chr1 | -	IR	11709584:11709931-11709931:11710022-11710022:11710131	11709584:11710131	0.169	0.1458	1	0.586
COAD	TCGA-A6-3809-01A-01R-A278-07.d2a9d239-ad6c-40bd-92ea-c05f0b6db305.aligned		intron_retention_8113	FBXO2	ENSG00000116661.9	chr1 | -	IR	11709584:11709931-11709931:11710022-11710022:11710131	11709584:11710131	0.169	0.1458	1	0.586
COAD	TCGA-A6-3810-01A-01R-A278-07.72da97cd-7b0c-414c-82ee-ae82091af5b3.aligned		intron_retention_8113	FBXO2	ENSG00000116661.9	chr1 | -	IR	11709584:11709931-11709931:11710022-11710022:11710131	11709584:11710131	0.169	0.1458	1	0.586
COAD	TCGA-A6-4105-01A-02R-1774-07.02425503-99c9-4a4e-841f-5b8b4de64148.aligned		intron_retention_8113	FBXO2	ENSG00000116661.9	chr1 | -	IR	11709584:11709931-11709931:11710022-11710022:11710131	11709584:11710131	0.169	0.1458	1	0.586
COAD	TCGA-A6-5656-01A-21R-1839-07.52f53fa6-d8ec-46db-87f9-11af1282ed6e.aligned		intron_retention_8113	FBXO2	ENSG00000116661.9	chr1 | -	IR	11709584:11709931-11709931:11710022-11710022:11710131	11709584:11710131	0.169	0.1458	1	0.586
COAD	TCGA-A6-5656-01A-21R-A278-07.83fa4a82-ee27-4c93-a685-b72c8b90a9d1.aligned		intron_retention_8113	FBXO2	ENSG00000116661.9	chr1 | -	IR	11709584:11709931-11709931:11710022-11710022:11710131	11709584:11710131	0.169	0.1458	1	0.586
COAD	TCGA-A6-5657-01A-01R-A32Z-07.2349d0c9-9b3d-4ca7-a8bb-987736c4585d.aligned		intron_retention_8113	FBXO2	ENSG00000116661.9	chr1 | -	IR	11709584:11709931-11709931:11710022-11710022:11710131	11709584:11710131	0.169	0.1458	1	0.586
COAD	TCGA-A6-5659-01A-01R-1653-07.b0617934-4319-4d0c-aac4-c004349926f7.aligned		intron_retention_8113	FBXO2	ENSG00000116661.9	chr1 | -	IR	11709584:11709931-11709931:11710022-11710022:11710131	11709584:11710131	0.169	0.1458	1	0.586
COAD	TCGA-A6-5659-01A-01R-A278-07.fa89193c-5cdd-4092-931e-867270bef743.aligned		intron_retention_8113	FBXO2	ENSG00000116661.9	chr1 | -	IR	11709584:11709931-11709931:11710022-11710022:11710131	11709584:11710131	0.169	0.1458	1	0.586
COAD	TCGA-A6-5659-11A-01R-1653-07.bdc32766-c722-43b9-946b-5204fd535f87.aligned		intron_retention_8113	FBXO2	ENSG00000116661.9	chr1 | -	IR	11709584:11709931-11709931:11710022-11710022:11710131	11709584:11710131	0.169	0.1458	1	0.586
COAD	TCGA-A6-5660-01A-01R-1653-07.b1a08390-b233-490f-8b9c-bb7ca78e6cab.aligned		intron_retention_8113	FBXO2	ENSG00000116661.9	chr1 | -	IR	11709584:11709931-11709931:11710022-11710022:11710131	11709584:11710131	0.169	0.1458	1	0.586
COAD	TCGA-A6-5661-01A-01R-1653-07.4c3f5930-d886-436e-861a-7ed08c44e32b.aligned		intron_retention_8113	FBXO2	ENSG00000116661.9	chr1 | -	IR	11709584:11709931-11709931:11710022-11710022:11710131	11709584:11710131	0.169	0.1458	1	0.586
COAD	TCGA-A6-5661-01B-05R-2302-07.bc8680ed-09c6-4406-90ca-af7085fefd53.aligned		intron_retention_8113	FBXO2	ENSG00000116661.9	chr1 | -	IR	11709584:11709931-11709931:11710022-11710022:11710131	11709584:11710131	0.169	0.1458	1	0.586
COAD	TCGA-A6-5662-01A-01R-1653-07.4e92fe80-4985-4b69-bab6-aece3c61c695.aligned	1	intron_retention_8113	FBXO2	ENSG00000116661.9	chr1 | -	IR	11709584:11709931-11709931:11710022-11710022:11710131	11709584:11710131	0.169	0.1458	1	0.586
COAD	TCGA-A6-5662-11A-01R-1653-07.c90eedc2-4b27-479c-b857-9a19267164dc.aligned		intron_retention_8113	FBXO2	ENSG00000116661.9	chr1 | -	IR	11709584:11709931-11709931:11710022-11710022:11710131	11709584:11710131	0.169	0.1458	1	0.586
COAD	TCGA-A6-5664-01A-21R-1839-07.15b4eaf4-b1c3-4d63-a0ad-ef64873f8f93.aligned		intron_retention_8113	FBXO2	ENSG00000116661.9	chr1 | -	IR	11709584:11709931-11709931:11710022-11710022:11710131	11709584:11710131	0.169	0.1458	1	0.586
COAD	TCGA-A6-5665-01A-01R-1653-07.05cebc11-0dce-482c-893e-5b279ec67a78.aligned		intron_retention_8113	FBXO2	ENSG00000116661.9	chr1 | -	IR	11709584:11709931-11709931:11710022-11710022:11710131	11709584:11710131	0.169	0.1458	1	0.586
COAD	TCGA-A6-5665-01B-03R-2302-07.e110017a-7907-42a5-a01d-c874dad24d0f.aligned		intron_retention_8113	FBXO2	ENSG00000116661.9	chr1 | -	IR	11709584:11709931-11709931:11710022-11710022:11710131	11709584:11710131	0.169	0.1458	1	0.586
COAD	TCGA-A6-5665-11A-01R-1653-07.0eb5967b-472f-446b-8b04-a6c7480b166a.aligned		intron_retention_8113	FBXO2	ENSG00000116661.9	chr1 | -	IR	11709584:11709931-11709931:11710022-11710022:11710131	11709584:11710131	0.169	0.1458	1	0.586
COAD	TCGA-A6-5666-01A-01R-1653-07.29e4210f-709c-457d-a570-7054ce29ef99.aligned		intron_retention_8113	FBXO2	ENSG00000116661.9	chr1 | -	IR	11709584:11709931-11709931:11710022-11710022:11710131	11709584:11710131	0.169	0.1458	1	0.586
COAD	TCGA-A6-5667-01A-21R-1723-07.76dbad94-73a2-4903-8a6f-3f3b40ce6f48.aligned	1	intron_retention_8113	FBXO2	ENSG00000116661.9	chr1 | -	IR	11709584:11709931-11709931:11710022-11710022:11710131	11709584:11710131	0.169	0.1458	1	0.586
COAD	TCGA-A6-5667-11A-01R-1723-07.798972e4-04d6-498b-9fe8-6ca7c2868da0.aligned		intron_retention_8113	FBXO2	ENSG00000116661.9	chr1 | -	IR	11709584:11709931-11709931:11710022-11710022:11710131	11709584:11710131	0.169	0.1458	1	0.586
COAD	TCGA-A6-6137-01A-11R-1774-07.ab5e0fde-c76b-4f9a-ae15-fa17e8695dbd.aligned		intron_retention_8113	FBXO2	ENSG00000116661.9	chr1 | -	IR	11709584:11709931-11709931:11710022-11710022:11710131	11709584:11710131	0.169	0.1458	1	0.586
COAD	TCGA-A6-6138-01A-11R-1774-07.966a397b-871a-4604-b515-4b90779b5134.aligned	1	intron_retention_8113	FBXO2	ENSG00000116661.9	chr1 | -	IR	11709584:11709931-11709931:11710022-11710022:11710131	11709584:11710131	0.169	0.1458	1	0.586
COAD	TCGA-A6-6140-01A-11R-1774-07.df2f08c6-d160-46af-aafa-f6c7886f3a92.aligned		intron_retention_8113	FBXO2	ENSG00000116661.9	chr1 | -	IR	11709584:11709931-11709931:11710022-11710022:11710131	11709584:11710131	0.169	0.1458	1	0.586
COAD	TCGA-A6-6141-01A-11R-1774-07.bdbeb4d2-aa03-492f-b43c-8b1c49d5b0ee.aligned		intron_retention_8113	FBXO2	ENSG00000116661.9	chr1 | -	IR	11709584:11709931-11709931:11710022-11710022:11710131	11709584:11710131	0.169	0.1458	1	0.586
COAD	TCGA-A6-6142-01A-11R-1774-07.47888c0a-0fd8-4bc2-844a-dfea0ce21bed.aligned	0.646	intron_retention_8113	FBXO2	ENSG00000116661.9	chr1 | -	IR	11709584:11709931-11709931:11710022-11710022:11710131	11709584:11710131	0.169	0.1458	1	0.586
COAD	TCGA-A6-6648-01A-11R-1774-07.756490d4-bc0a-449b-9766-144ee2800021.aligned		intron_retention_8113	FBXO2	ENSG00000116661.9	chr1 | -	IR	11709584:11709931-11709931:11710022-11710022:11710131	11709584:11710131	0.169	0.1458	1	0.586
COAD	TCGA-A6-6649-01A-11R-1774-07.1eee1136-f567-482b-b64d-a4761e615170.aligned		intron_retention_8113	FBXO2	ENSG00000116661.9	chr1 | -	IR	11709584:11709931-11709931:11710022-11710022:11710131	11709584:11710131	0.169	0.1458	1	0.586
COAD	TCGA-A6-6650-01A-11R-1774-07.0b0bbc77-a9f3-4298-ba21-587d10209b0b.aligned		intron_retention_8113	FBXO2	ENSG00000116661.9	chr1 | -	IR	11709584:11709931-11709931:11710022-11710022:11710131	11709584:11710131	0.169	0.1458	1	0.586
COAD	TCGA-A6-6650-01A-11R-A278-07.97e6f1c1-f080-4b0d-b53e-17282379ec92.aligned		intron_retention_8113	FBXO2	ENSG00000116661.9	chr1 | -	IR	11709584:11709931-11709931:11710022-11710022:11710131	11709584:11710131	0.169	0.1458	1	0.586
COAD	TCGA-A6-6651-01A-21R-1839-07.c4bd435f-a171-401b-abc5-1d90b03e2d9b.aligned	1	intron_retention_8113	FBXO2	ENSG00000116661.9	chr1 | -	IR	11709584:11709931-11709931:11710022-11710022:11710131	11709584:11710131	0.169	0.1458	1	0.586
COAD	TCGA-A6-6652-01A-11R-1774-07.fecdc742-c116-479c-8660-03b122543662.aligned	0.677	intron_retention_8113	FBXO2	ENSG00000116661.9	chr1 | -	IR	11709584:11709931-11709931:11710022-11710022:11710131	11709584:11710131	0.169	0.1458	1	0.586
COAD	TCGA-A6-6653-01A-11R-1774-07.f5e7f7ed-c286-4f65-b3ea-e7cd6fab03b2.aligned		intron_retention_8113	FBXO2	ENSG00000116661.9	chr1 | -	IR	11709584:11709931-11709931:11710022-11710022:11710131	11709584:11710131	0.169	0.1458	1	0.586
COAD	TCGA-A6-6654-01A-21R-1839-07.4e79360a-53a8-445e-b68a-7195b76addd5.aligned	1	intron_retention_8113	FBXO2	ENSG00000116661.9	chr1 | -	IR	11709584:11709931-11709931:11710022-11710022:11710131	11709584:11710131	0.169	0.1458	1	0.586
COAD	TCGA-A6-6780-01A-11R-A278-07.4195c5cf-6750-4266-86ff-9942914962b1.aligned		intron_retention_8113	FBXO2	ENSG00000116661.9	chr1 | -	IR	11709584:11709931-11709931:11710022-11710022:11710131	11709584:11710131	0.169	0.1458	1	0.586
COAD	TCGA-A6-6780-01A-11R-1839-07.91c21f37-ee2f-413e-a509-ea8ff975dad5.aligned		intron_retention_8113	FBXO2	ENSG00000116661.9	chr1 | -	IR	11709584:11709931-11709931:11710022-11710022:11710131	11709584:11710131	0.169	0.1458	1	0.586
COAD	TCGA-A6-6781-01A-22R-A278-07.9207eba7-e42f-4663-b1af-250971977c83.aligned	1	intron_retention_8113	FBXO2	ENSG00000116661.9	chr1 | -	IR	11709584:11709931-11709931:11710022-11710022:11710131	11709584:11710131	0.169	0.1458	1	0.586
COAD	TCGA-A6-6781-01A-22R-1928-07.f9c8fe0e-124c-4099-b1bc-64f856deafeb.aligned	1	intron_retention_8113	FBXO2	ENSG00000116661.9	chr1 | -	IR	11709584:11709931-11709931:11710022-11710022:11710131	11709584:11710131	0.169	0.1458	1	0.586
COAD	TCGA-A6-6782-01A-11R-1839-07.99cb42da-b846-4463-b13a-79a08f5be5ea.aligned		intron_retention_8113	FBXO2	ENSG00000116661.9	chr1 | -	IR	11709584:11709931-11709931:11710022-11710022:11710131	11709584:11710131	0.169	0.1458	1	0.586
COAD	TCGA-A6-A565-01A-31R-A28H-07.df99cfd8-0e22-4c24-b8e6-038fb8a9c1b8.aligned		intron_retention_8113	FBXO2	ENSG00000116661.9	chr1 | -	IR	11709584:11709931-11709931:11710022-11710022:11710131	11709584:11710131	0.169	0.1458	1	0.586
COAD	TCGA-A6-A566-01A-11R-A28H-07.23d7ce5f-3da1-4613-9607-d64ab3798c53.aligned		intron_retention_8113	FBXO2	ENSG00000116661.9	chr1 | -	IR	11709584:11709931-11709931:11710022-11710022:11710131	11709584:11710131	0.169	0.1458	1	0.586
COAD	TCGA-A6-A567-01A-31R-A28H-07.67cab911-4a5a-410b-87f5-22393125e768.aligned		intron_retention_8113	FBXO2	ENSG00000116661.9	chr1 | -	IR	11709584:11709931-11709931:11710022-11710022:11710131	11709584:11710131	0.169	0.1458	1	0.586
COAD	TCGA-A6-A56B-01A-31R-A28H-07.29cf10cc-a176-45f5-a570-bba7b569d4f9.aligned		intron_retention_8113	FBXO2	ENSG00000116661.9	chr1 | -	IR	11709584:11709931-11709931:11710022-11710022:11710131	11709584:11710131	0.169	0.1458	1	0.586
COAD	TCGA-A6-A5ZU-01A-11R-A28H-07.1a381da2-9979-4e40-95c4-31860e32ac6c.aligned		intron_retention_8113	FBXO2	ENSG00000116661.9	chr1 | -	IR	11709584:11709931-11709931:11710022-11710022:11710131	11709584:11710131	0.169	0.1458	1	0.586
COAD	TCGA-AA-3489-01A-21R-1839-07.5a6fa767-e7be-418d-afec-ab806dd0796b.aligned		intron_retention_8113	FBXO2	ENSG00000116661.9	chr1 | -	IR	11709584:11709931-11709931:11710022-11710022:11710131	11709584:11710131	0.169	0.1458	1	0.586
COAD	TCGA-AA-3489-11A-01R-1839-07.a6ce566a-b5c9-4f72-a0d0-1ad705e7cd5f.aligned		intron_retention_8113	FBXO2	ENSG00000116661.9	chr1 | -	IR	11709584:11709931-11709931:11710022-11710022:11710131	11709584:11710131	0.169	0.1458	1	0.586
COAD	TCGA-AA-3496-01A-21R-1839-07.e63057bc-ca98-4d72-8097-1c1fb2d19882.aligned		intron_retention_8113	FBXO2	ENSG00000116661.9	chr1 | -	IR	11709584:11709931-11709931:11710022-11710022:11710131	11709584:11710131	0.169	0.1458	1	0.586
COAD	TCGA-AA-3496-11A-01R-1839-07.697581bc-95f3-4745-be85-17e8d81a6e89.aligned		intron_retention_8113	FBXO2	ENSG00000116661.9	chr1 | -	IR	11709584:11709931-11709931:11710022-11710022:11710131	11709584:11710131	0.169	0.1458	1	0.586
COAD	TCGA-AA-3511-01A-21R-1839-07.ada6b8cf-fdd9-4de9-8a4b-5e8fbaaf995d.aligned	1	intron_retention_8113	FBXO2	ENSG00000116661.9	chr1 | -	IR	11709584:11709931-11709931:11710022-11710022:11710131	11709584:11710131	0.169	0.1458	1	0.586
COAD	TCGA-AA-3511-11A-01R-1839-07.ea57dbc8-b1d0-41ba-8f73-729ef0a4147b.aligned		intron_retention_8113	FBXO2	ENSG00000116661.9	chr1 | -	IR	11709584:11709931-11709931:11710022-11710022:11710131	11709584:11710131	0.169	0.1458	1	0.586
COAD	TCGA-AA-3514-11A-01R-A32Z-07.1cbc3e13-be23-4e97-9127-69eaf5dc87f5.aligned		intron_retention_8113	FBXO2	ENSG00000116661.9	chr1 | -	IR	11709584:11709931-11709931:11710022-11710022:11710131	11709584:11710131	0.169	0.1458	1	0.586
COAD	TCGA-AA-3516-11A-01R-A32Z-07.8aa89c02-8881-43f5-8e5c-8ce31d1b760e.aligned		intron_retention_8113	FBXO2	ENSG00000116661.9	chr1 | -	IR	11709584:11709931-11709931:11710022-11710022:11710131	11709584:11710131	0.169	0.1458	1	0.586
COAD	TCGA-AA-3517-11A-01R-A32Z-07.278e7651-b5df-426c-b296-fe33d83fb5b3.aligned		intron_retention_8113	FBXO2	ENSG00000116661.9	chr1 | -	IR	11709584:11709931-11709931:11710022-11710022:11710131	11709584:11710131	0.169	0.1458	1	0.586
COAD	TCGA-AA-3520-11A-01R-A32Z-07.7aed54d8-79aa-45eb-8afc-ffc97f18232c.aligned		intron_retention_8113	FBXO2	ENSG00000116661.9	chr1 | -	IR	11709584:11709931-11709931:11710022-11710022:11710131	11709584:11710131	0.169	0.1458	1	0.586
COAD	TCGA-AA-3522-11A-01R-A32Z-07.6faa391d-a7e8-4a3f-a89b-9bd1a588cf5f.aligned		intron_retention_8113	FBXO2	ENSG00000116661.9	chr1 | -	IR	11709584:11709931-11709931:11710022-11710022:11710131	11709584:11710131	0.169	0.1458	1	0.586
COAD	TCGA-AA-3525-11A-01R-A32Z-07.8a3bb9f6-2272-4cf6-8478-9bd51484f5c9.aligned		intron_retention_8113	FBXO2	ENSG00000116661.9	chr1 | -	IR	11709584:11709931-11709931:11710022-11710022:11710131	11709584:11710131	0.169	0.1458	1	0.586
COAD	TCGA-AA-3526-01A-02R-A32Z-07.036cbd41-560c-452d-94c4-f9ffeb1a3c46.aligned		intron_retention_8113	FBXO2	ENSG00000116661.9	chr1 | -	IR	11709584:11709931-11709931:11710022-11710022:11710131	11709584:11710131	0.169	0.1458	1	0.586
COAD	TCGA-AA-3527-11A-01R-A32Z-07.195c3ccb-463b-4a68-ab8e-bcd2e0ce05d5.aligned		intron_retention_8113	FBXO2	ENSG00000116661.9	chr1 | -	IR	11709584:11709931-11709931:11710022-11710022:11710131	11709584:11710131	0.169	0.1458	1	0.586
COAD	TCGA-AA-3531-11A-01R-A32Z-07.7af22bfc-9dbf-48a1-89d6-b8584bab10bb.aligned		intron_retention_8113	FBXO2	ENSG00000116661.9	chr1 | -	IR	11709584:11709931-11709931:11710022-11710022:11710131	11709584:11710131	0.169	0.1458	1	0.586
COAD	TCGA-AA-3534-11A-01R-A32Z-07.4a3e65c1-08b7-4154-a429-2fe24b0f8109.aligned		intron_retention_8113	FBXO2	ENSG00000116661.9	chr1 | -	IR	11709584:11709931-11709931:11710022-11710022:11710131	11709584:11710131	0.169	0.1458	1	0.586
COAD	TCGA-AA-3655-01A-02R-1723-07.6d26af33-f181-4b3f-95b9-ac3c15c96592.aligned		intron_retention_8113	FBXO2	ENSG00000116661.9	chr1 | -	IR	11709584:11709931-11709931:11710022-11710022:11710131	11709584:11710131	0.169	0.1458	1	0.586
COAD	TCGA-AA-3655-11A-01R-1723-07.5dce6ab3-c24f-4de9-ba94-6b9589e87735.aligned		intron_retention_8113	FBXO2	ENSG00000116661.9	chr1 | -	IR	11709584:11709931-11709931:11710022-11710022:11710131	11709584:11710131	0.169	0.1458	1	0.586
COAD	TCGA-AA-3660-01A-01R-1723-07.7e7bd6d1-e7ee-472c-9c03-abcf2bff5688.aligned		intron_retention_8113	FBXO2	ENSG00000116661.9	chr1 | -	IR	11709584:11709931-11709931:11710022-11710022:11710131	11709584:11710131	0.169	0.1458	1	0.586
COAD	TCGA-AA-3660-11A-01R-1723-07.c0dfbc46-52e7-454f-8cca-ac933ed31789.aligned		intron_retention_8113	FBXO2	ENSG00000116661.9	chr1 | -	IR	11709584:11709931-11709931:11710022-11710022:11710131	11709584:11710131	0.169	0.1458	1	0.586
COAD	TCGA-AA-3662-01A-01R-1723-07.72540fd3-40fd-44bb-8114-38b71afa16d0.aligned		intron_retention_8113	FBXO2	ENSG00000116661.9	chr1 | -	IR	11709584:11709931-11709931:11710022-11710022:11710131	11709584:11710131	0.169	0.1458	1	0.586
COAD	TCGA-AA-3662-11A-01R-1723-07.002f75a0-98e8-4b4b-a568-538b79703c19.aligned		intron_retention_8113	FBXO2	ENSG00000116661.9	chr1 | -	IR	11709584:11709931-11709931:11710022-11710022:11710131	11709584:11710131	0.169	0.1458	1	0.586
COAD	TCGA-AA-3663-01A-01R-1723-07.0d8e19e9-20fd-4b1a-98ea-2a7262b58c73.aligned		intron_retention_8113	FBXO2	ENSG00000116661.9	chr1 | -	IR	11709584:11709931-11709931:11710022-11710022:11710131	11709584:11710131	0.169	0.1458	1	0.586
COAD	TCGA-AA-3663-11A-01R-1723-07.29a63711-6e49-4659-a7e0-8e8fef23a941.aligned		intron_retention_8113	FBXO2	ENSG00000116661.9	chr1 | -	IR	11709584:11709931-11709931:11710022-11710022:11710131	11709584:11710131	0.169	0.1458	1	0.586
COAD	TCGA-AA-3675-01A-02R-0905-07.06825f9e-18a0-40ae-877c-7e01d4552283.aligned		intron_retention_8113	FBXO2	ENSG00000116661.9	chr1 | -	IR	11709584:11709931-11709931:11710022-11710022:11710131	11709584:11710131	0.169	0.1458	1	0.586
COAD	TCGA-AA-3685-01A-02R-A32Z-07.92962fd5-2a14-4e63-ae3f-97cdb83934ab.aligned		intron_retention_8113	FBXO2	ENSG00000116661.9	chr1 | -	IR	11709584:11709931-11709931:11710022-11710022:11710131	11709584:11710131	0.169	0.1458	1	0.586
COAD	TCGA-AA-3697-01A-01R-1723-07.ee650e88-f485-4dae-aa97-0775d9b0a7bf.aligned	1	intron_retention_8113	FBXO2	ENSG00000116661.9	chr1 | -	IR	11709584:11709931-11709931:11710022-11710022:11710131	11709584:11710131	0.169	0.1458	1	0.586
COAD	TCGA-AA-3697-11A-01R-1723-07.c1101cac-e120-44ea-aa0f-d70f7bf4f837.aligned		intron_retention_8113	FBXO2	ENSG00000116661.9	chr1 | -	IR	11709584:11709931-11709931:11710022-11710022:11710131	11709584:11710131	0.169	0.1458	1	0.586
COAD	TCGA-AA-3712-01A-21R-1723-07.a8d4eaf8-812e-4842-bc6d-dc7c1c07c271.aligned		intron_retention_8113	FBXO2	ENSG00000116661.9	chr1 | -	IR	11709584:11709931-11709931:11710022-11710022:11710131	11709584:11710131	0.169	0.1458	1	0.586
COAD	TCGA-AA-3712-11A-01R-1723-07.95e0c7c1-317c-4645-ba28-1ef598238f5b.aligned		intron_retention_8113	FBXO2	ENSG00000116661.9	chr1 | -	IR	11709584:11709931-11709931:11710022-11710022:11710131	11709584:11710131	0.169	0.1458	1	0.586
COAD	TCGA-AA-3713-01A-21R-1723-07.86414f87-c2a2-4ecb-92eb-7663492ba76b.aligned		intron_retention_8113	FBXO2	ENSG00000116661.9	chr1 | -	IR	11709584:11709931-11709931:11710022-11710022:11710131	11709584:11710131	0.169	0.1458	1	0.586
COAD	TCGA-AA-3713-11A-01R-1723-07.9a966df0-da41-4dd8-856a-82b40056c0d1.aligned		intron_retention_8113	FBXO2	ENSG00000116661.9	chr1 | -	IR	11709584:11709931-11709931:11710022-11710022:11710131	11709584:11710131	0.169	0.1458	1	0.586
COAD	TCGA-AA-A02K-01A-03R-A32Y-07.e6f79fed-fbb6-476a-92c1-f71424a55737.aligned		intron_retention_8113	FBXO2	ENSG00000116661.9	chr1 | -	IR	11709584:11709931-11709931:11710022-11710022:11710131	11709584:11710131	0.169	0.1458	1	0.586
COAD	TCGA-AA-A02Y-01A-43R-A32Y-07.c73b5974-5e67-41c9-b2c9-b38420465112.aligned		intron_retention_8113	FBXO2	ENSG00000116661.9	chr1 | -	IR	11709584:11709931-11709931:11710022-11710022:11710131	11709584:11710131	0.169	0.1458	1	0.586
COAD	TCGA-AD-5900-01A-11R-1653-07.b4fe4472-ff04-497b-bd11-f9bab81b2062.aligned		intron_retention_8113	FBXO2	ENSG00000116661.9	chr1 | -	IR	11709584:11709931-11709931:11710022-11710022:11710131	11709584:11710131	0.169	0.1458	1	0.586
COAD	TCGA-AD-6548-01A-11R-1839-07.ae0b0540-fcb6-4c9e-8835-2cb24933a01f.aligned		intron_retention_8113	FBXO2	ENSG00000116661.9	chr1 | -	IR	11709584:11709931-11709931:11710022-11710022:11710131	11709584:11710131	0.169	0.1458	1	0.586
COAD	TCGA-AD-6888-01A-11R-1928-07.3b6806b3-f244-4d8f-882c-e675bfd95fd1.aligned	0.664	intron_retention_8113	FBXO2	ENSG00000116661.9	chr1 | -	IR	11709584:11709931-11709931:11710022-11710022:11710131	11709584:11710131	0.169	0.1458	1	0.586
COAD	TCGA-AD-6889-01A-11R-1928-07.b9437781-a608-4e94-83cd-0b4531e7f74b.aligned		intron_retention_8113	FBXO2	ENSG00000116661.9	chr1 | -	IR	11709584:11709931-11709931:11710022-11710022:11710131	11709584:11710131	0.169	0.1458	1	0.586
COAD	TCGA-AD-6890-01A-11R-1928-07.580423c8-4aa9-4677-8d58-a09bc89bb11c.aligned		intron_retention_8113	FBXO2	ENSG00000116661.9	chr1 | -	IR	11709584:11709931-11709931:11710022-11710022:11710131	11709584:11710131	0.169	0.1458	1	0.586
COAD	TCGA-AD-6895-01A-11R-1928-07.f62909ce-f6f3-4a11-be01-4bf582e3ddb8.aligned		intron_retention_8113	FBXO2	ENSG00000116661.9	chr1 | -	IR	11709584:11709931-11709931:11710022-11710022:11710131	11709584:11710131	0.169	0.1458	1	0.586
COAD	TCGA-AD-6899-01A-11R-1928-07.13397543-2451-40c1-a9ca-3cf2e6578a79.aligned		intron_retention_8113	FBXO2	ENSG00000116661.9	chr1 | -	IR	11709584:11709931-11709931:11710022-11710022:11710131	11709584:11710131	0.169	0.1458	1	0.586
COAD	TCGA-AD-6901-01A-11R-1928-07.d283ed4c-330c-41a9-accd-e73fc689d94a.aligned		intron_retention_8113	FBXO2	ENSG00000116661.9	chr1 | -	IR	11709584:11709931-11709931:11710022-11710022:11710131	11709584:11710131	0.169	0.1458	1	0.586
COAD	TCGA-AD-6963-01A-11R-1928-07.b968551d-6bca-4ebb-b16c-b25132be0965.aligned	1	intron_retention_8113	FBXO2	ENSG00000116661.9	chr1 | -	IR	11709584:11709931-11709931:11710022-11710022:11710131	11709584:11710131	0.169	0.1458	1	0.586
COAD	TCGA-AD-6964-01A-11R-1928-07.9774e154-3b3f-45ce-8082-243bd03a0493.aligned		intron_retention_8113	FBXO2	ENSG00000116661.9	chr1 | -	IR	11709584:11709931-11709931:11710022-11710022:11710131	11709584:11710131	0.169	0.1458	1	0.586
COAD	TCGA-AD-6965-01A-11R-1928-07.116eb411-e34a-4d37-8fce-87b72c902529.aligned		intron_retention_8113	FBXO2	ENSG00000116661.9	chr1 | -	IR	11709584:11709931-11709931:11710022-11710022:11710131	11709584:11710131	0.169	0.1458	1	0.586
COAD	TCGA-AD-A5EJ-01A-11R-A28H-07.61f2a72b-a643-4c06-bdeb-ce77d4ce9bc1.aligned		intron_retention_8113	FBXO2	ENSG00000116661.9	chr1 | -	IR	11709584:11709931-11709931:11710022-11710022:11710131	11709584:11710131	0.169	0.1458	1	0.586
COAD	TCGA-AD-A5EK-01A-11R-A28H-07.44dfb04b-bb65-43b6-98b3-b34fba958e37.aligned		intron_retention_8113	FBXO2	ENSG00000116661.9	chr1 | -	IR	11709584:11709931-11709931:11710022-11710022:11710131	11709584:11710131	0.169	0.1458	1	0.586
COAD	TCGA-AM-5820-01A-01R-1653-07.ecf539d8-a411-43d8-8ce4-97a19c6ed6c5.aligned		intron_retention_8113	FBXO2	ENSG00000116661.9	chr1 | -	IR	11709584:11709931-11709931:11710022-11710022:11710131	11709584:11710131	0.169	0.1458	1	0.586
COAD	TCGA-AM-5821-01A-01R-1653-07.caa3723b-04fc-4269-9df3-227a3f131f10.aligned	0.414	intron_retention_8113	FBXO2	ENSG00000116661.9	chr1 | -	IR	11709584:11709931-11709931:11710022-11710022:11710131	11709584:11710131	0.169	0.1458	1	0.586
COAD	TCGA-AU-3779-01A-01R-1723-07.56da8a36-15d0-4140-8164-4965945eb218.aligned		intron_retention_8113	FBXO2	ENSG00000116661.9	chr1 | -	IR	11709584:11709931-11709931:11710022-11710022:11710131	11709584:11710131	0.169	0.1458	1	0.586
COAD	TCGA-AU-6004-01A-11R-1723-07.6fcc9bee-2d5f-4f75-9710-381d57fc883c.aligned		intron_retention_8113	FBXO2	ENSG00000116661.9	chr1 | -	IR	11709584:11709931-11709931:11710022-11710022:11710131	11709584:11710131	0.169	0.1458	1	0.586
COAD	TCGA-AY-5543-01A-01R-1653-07.c802ea4d-922b-4a14-a74d-95f3ca10f9a3.aligned		intron_retention_8113	FBXO2	ENSG00000116661.9	chr1 | -	IR	11709584:11709931-11709931:11710022-11710022:11710131	11709584:11710131	0.169	0.1458	1	0.586
COAD	TCGA-AY-6196-01A-11R-1723-07.9be88350-4691-41cb-88c5-d1676dca68ab.aligned		intron_retention_8113	FBXO2	ENSG00000116661.9	chr1 | -	IR	11709584:11709931-11709931:11710022-11710022:11710131	11709584:11710131	0.169	0.1458	1	0.586
COAD	TCGA-AY-6197-01A-11R-1723-07.495bec4f-0d23-40ca-bcab-f03dd724137f.aligned		intron_retention_8113	FBXO2	ENSG00000116661.9	chr1 | -	IR	11709584:11709931-11709931:11710022-11710022:11710131	11709584:11710131	0.169	0.1458	1	0.586
COAD	TCGA-AY-6386-01A-21R-1723-07.100d05e8-c2b5-4177-8685-b47875a5614c.aligned		intron_retention_8113	FBXO2	ENSG00000116661.9	chr1 | -	IR	11709584:11709931-11709931:11710022-11710022:11710131	11709584:11710131	0.169	0.1458	1	0.586
COAD	TCGA-AY-A54L-01A-11R-A28H-07.5cd0eb59-abe2-4932-84d1-e76de485b53e.aligned		intron_retention_8113	FBXO2	ENSG00000116661.9	chr1 | -	IR	11709584:11709931-11709931:11710022-11710022:11710131	11709584:11710131	0.169	0.1458	1	0.586
COAD	TCGA-AY-A69D-01A-11R-A37K-07.fbb56fa6-5205-4a92-9154-6f1a3bc6da28.aligned		intron_retention_8113	FBXO2	ENSG00000116661.9	chr1 | -	IR	11709584:11709931-11709931:11710022-11710022:11710131	11709584:11710131	0.169	0.1458	1	0.586
COAD	TCGA-AY-A71X-01A-12R-A37K-07.013e625d-9dec-4e92-8130-1e99fe7a86e0.aligned		intron_retention_8113	FBXO2	ENSG00000116661.9	chr1 | -	IR	11709584:11709931-11709931:11710022-11710022:11710131	11709584:11710131	0.169	0.1458	1	0.586
COAD	TCGA-AY-A8YK-01A-11R-A41B-07.23404035-b398-47bb-8d19-8345cb151471.aligned		intron_retention_8113	FBXO2	ENSG00000116661.9	chr1 | -	IR	11709584:11709931-11709931:11710022-11710022:11710131	11709584:11710131	0.169	0.1458	1	0.586
COAD	TCGA-AZ-4323-01A-21R-1839-07.a57dad4d-e09e-4ad2-9db1-1fea79435706.aligned	1	intron_retention_8113	FBXO2	ENSG00000116661.9	chr1 | -	IR	11709584:11709931-11709931:11710022-11710022:11710131	11709584:11710131	0.169	0.1458	1	0.586
COAD	TCGA-AZ-4616-01A-21R-1839-07.bcf523e4-6976-4f82-8d83-e0d926d0b100.aligned		intron_retention_8113	FBXO2	ENSG00000116661.9	chr1 | -	IR	11709584:11709931-11709931:11710022-11710022:11710131	11709584:11710131	0.169	0.1458	1	0.586
COAD	TCGA-AZ-4682-01B-01R-A32Z-07.8f9bdd3c-3c62-486c-a64c-f408d58d6e30.aligned		intron_retention_8113	FBXO2	ENSG00000116661.9	chr1 | -	IR	11709584:11709931-11709931:11710022-11710022:11710131	11709584:11710131	0.169	0.1458	1	0.586
COAD	TCGA-AZ-5403-01A-01R-1653-07.f017e087-41c2-495b-82bd-8d425a4aacf4.aligned	1	intron_retention_8113	FBXO2	ENSG00000116661.9	chr1 | -	IR	11709584:11709931-11709931:11710022-11710022:11710131	11709584:11710131	0.169	0.1458	1	0.586
COAD	TCGA-AZ-5407-01A-01R-1723-07.8e95aefa-3df8-4c97-abda-bb4e8b3309e2.aligned		intron_retention_8113	FBXO2	ENSG00000116661.9	chr1 | -	IR	11709584:11709931-11709931:11710022-11710022:11710131	11709584:11710131	0.169	0.1458	1	0.586
COAD	TCGA-AZ-6598-01A-11R-1774-07.be646d0d-d5a6-478b-a3eb-71142d84c884.aligned		intron_retention_8113	FBXO2	ENSG00000116661.9	chr1 | -	IR	11709584:11709931-11709931:11710022-11710022:11710131	11709584:11710131	0.169	0.1458	1	0.586
COAD	TCGA-AZ-6598-11A-01R-1774-07.ba28ba04-d709-48c8-bd20-2b036ef54e2c.aligned		intron_retention_8113	FBXO2	ENSG00000116661.9	chr1 | -	IR	11709584:11709931-11709931:11710022-11710022:11710131	11709584:11710131	0.169	0.1458	1	0.586
COAD	TCGA-AZ-6599-01A-11R-1774-07.fe4d5eca-9363-4fc5-8f9e-a28b32bb1bbf.aligned		intron_retention_8113	FBXO2	ENSG00000116661.9	chr1 | -	IR	11709584:11709931-11709931:11710022-11710022:11710131	11709584:11710131	0.169	0.1458	1	0.586
COAD	TCGA-AZ-6599-11A-01R-1774-07.8f01dbbd-6aaa-4efe-a79a-3e32ccbedc90.aligned		intron_retention_8113	FBXO2	ENSG00000116661.9	chr1 | -	IR	11709584:11709931-11709931:11710022-11710022:11710131	11709584:11710131	0.169	0.1458	1	0.586
COAD	TCGA-AZ-6600-01A-11R-1774-07.ee5a01f3-fd56-467d-bbbc-b1c3cd373138.aligned		intron_retention_8113	FBXO2	ENSG00000116661.9	chr1 | -	IR	11709584:11709931-11709931:11710022-11710022:11710131	11709584:11710131	0.169	0.1458	1	0.586
COAD	TCGA-AZ-6600-11A-01R-1774-07.0cae03e2-f9d7-42a6-9f78-16d177590270.aligned		intron_retention_8113	FBXO2	ENSG00000116661.9	chr1 | -	IR	11709584:11709931-11709931:11710022-11710022:11710131	11709584:11710131	0.169	0.1458	1	0.586
COAD	TCGA-AZ-6601-01A-11R-1774-07.bec43388-f9ec-4039-84ad-6d1a0f557922.aligned		intron_retention_8113	FBXO2	ENSG00000116661.9	chr1 | -	IR	11709584:11709931-11709931:11710022-11710022:11710131	11709584:11710131	0.169	0.1458	1	0.586
COAD	TCGA-AZ-6601-11A-01R-1774-07.99967caa-2b08-4ac8-8a3b-166661deee81.aligned		intron_retention_8113	FBXO2	ENSG00000116661.9	chr1 | -	IR	11709584:11709931-11709931:11710022-11710022:11710131	11709584:11710131	0.169	0.1458	1	0.586
COAD	TCGA-AZ-6603-01A-11R-1839-07.b16349cb-2b41-4235-b20f-116b8c71604f.aligned	1	intron_retention_8113	FBXO2	ENSG00000116661.9	chr1 | -	IR	11709584:11709931-11709931:11710022-11710022:11710131	11709584:11710131	0.169	0.1458	1	0.586
COAD	TCGA-AZ-6603-11A-02R-1839-07.19cc121b-759b-4368-8a98-b0bd8cf7269a.aligned		intron_retention_8113	FBXO2	ENSG00000116661.9	chr1 | -	IR	11709584:11709931-11709931:11710022-11710022:11710131	11709584:11710131	0.169	0.1458	1	0.586
COAD	TCGA-AZ-6605-01A-11R-1839-07.590576e0-24f2-4e70-8fd9-406fdc4dff5e.aligned	1	intron_retention_8113	FBXO2	ENSG00000116661.9	chr1 | -	IR	11709584:11709931-11709931:11710022-11710022:11710131	11709584:11710131	0.169	0.1458	1	0.586
COAD	TCGA-AZ-6605-11A-01R-1839-07.127842a2-ceb2-40c7-9c74-c720682f96cd.aligned		intron_retention_8113	FBXO2	ENSG00000116661.9	chr1 | -	IR	11709584:11709931-11709931:11710022-11710022:11710131	11709584:11710131	0.169	0.1458	1	0.586
COAD	TCGA-AZ-6606-01A-11R-1839-07.3c7cf914-e9ed-43ed-8639-525998b2fe4d.aligned		intron_retention_8113	FBXO2	ENSG00000116661.9	chr1 | -	IR	11709584:11709931-11709931:11710022-11710022:11710131	11709584:11710131	0.169	0.1458	1	0.586
COAD	TCGA-AZ-6607-01A-11R-1839-07.f334d507-bf76-4cd0-80eb-6135b697b9e9.aligned		intron_retention_8113	FBXO2	ENSG00000116661.9	chr1 | -	IR	11709584:11709931-11709931:11710022-11710022:11710131	11709584:11710131	0.169	0.1458	1	0.586
COAD	TCGA-AZ-6608-01A-11R-1839-07.b7f8e77d-8de7-41e6-889e-c6780a214543.aligned	1	intron_retention_8113	FBXO2	ENSG00000116661.9	chr1 | -	IR	11709584:11709931-11709931:11710022-11710022:11710131	11709584:11710131	0.169	0.1458	1	0.586
COAD	TCGA-CA-5254-01A-21R-1839-07.e4c9e94b-f19d-47fc-867f-240745c556b8.aligned		intron_retention_8113	FBXO2	ENSG00000116661.9	chr1 | -	IR	11709584:11709931-11709931:11710022-11710022:11710131	11709584:11710131	0.169	0.1458	1	0.586
COAD	TCGA-CA-5255-01A-11R-1839-07.d57626ff-a552-4e9a-a54d-6fbad5be0a74.aligned		intron_retention_8113	FBXO2	ENSG00000116661.9	chr1 | -	IR	11709584:11709931-11709931:11710022-11710022:11710131	11709584:11710131	0.169	0.1458	1	0.586
COAD	TCGA-CA-5796-01A-01R-1653-07.28c3f171-d7e6-40f2-8764-45b22ede8a0e.aligned		intron_retention_8113	FBXO2	ENSG00000116661.9	chr1 | -	IR	11709584:11709931-11709931:11710022-11710022:11710131	11709584:11710131	0.169	0.1458	1	0.586
COAD	TCGA-CA-5797-01A-01R-1653-07.e2e46f4c-b069-4c80-9ff0-ec6d45e14fb7.aligned	1	intron_retention_8113	FBXO2	ENSG00000116661.9	chr1 | -	IR	11709584:11709931-11709931:11710022-11710022:11710131	11709584:11710131	0.169	0.1458	1	0.586
COAD	TCGA-CA-6715-01A-21R-1839-07.62c2e824-9162-4e82-960c-15b6e61a92ea.aligned		intron_retention_8113	FBXO2	ENSG00000116661.9	chr1 | -	IR	11709584:11709931-11709931:11710022-11710022:11710131	11709584:11710131	0.169	0.1458	1	0.586
COAD	TCGA-CA-6716-01A-11R-1839-07.de926d40-12cd-4aba-bb2e-10d2f7768f49.aligned		intron_retention_8113	FBXO2	ENSG00000116661.9	chr1 | -	IR	11709584:11709931-11709931:11710022-11710022:11710131	11709584:11710131	0.169	0.1458	1	0.586
COAD	TCGA-CA-6717-01A-11R-1839-07.f53cf9e2-dcf1-4b70-b266-284dcf11f492.aligned		intron_retention_8113	FBXO2	ENSG00000116661.9	chr1 | -	IR	11709584:11709931-11709931:11710022-11710022:11710131	11709584:11710131	0.169	0.1458	1	0.586
COAD	TCGA-CA-6718-01A-11R-1839-07.4bc6fee0-71a0-43c6-a700-e3dc86865d70.aligned		intron_retention_8113	FBXO2	ENSG00000116661.9	chr1 | -	IR	11709584:11709931-11709931:11710022-11710022:11710131	11709584:11710131	0.169	0.1458	1	0.586
COAD	TCGA-CA-6719-01A-11R-1839-07.f26b8f5b-d948-4d2c-a318-928e6f1f6d40.aligned		intron_retention_8113	FBXO2	ENSG00000116661.9	chr1 | -	IR	11709584:11709931-11709931:11710022-11710022:11710131	11709584:11710131	0.169	0.1458	1	0.586
COAD	TCGA-CK-4947-01B-11R-1653-07.94bcd902-dea9-4d95-a202-943d226f7ad5.aligned		intron_retention_8113	FBXO2	ENSG00000116661.9	chr1 | -	IR	11709584:11709931-11709931:11710022-11710022:11710131	11709584:11710131	0.169	0.1458	1	0.586
COAD	TCGA-CK-4948-01B-11R-1653-07.997e6b10-68ba-4ae5-bfd1-a6d74518e0a1.aligned	1	intron_retention_8113	FBXO2	ENSG00000116661.9	chr1 | -	IR	11709584:11709931-11709931:11710022-11710022:11710131	11709584:11710131	0.169	0.1458	1	0.586
COAD	TCGA-CK-4950-01A-01R-1723-07.1c399aa3-51e0-4ae4-9c9f-5d0433a3408d.aligned		intron_retention_8113	FBXO2	ENSG00000116661.9	chr1 | -	IR	11709584:11709931-11709931:11710022-11710022:11710131	11709584:11710131	0.169	0.1458	1	0.586
COAD	TCGA-CK-4952-01A-01R-1723-07.45ef09fb-4989-4774-812a-e33937b13621.aligned		intron_retention_8113	FBXO2	ENSG00000116661.9	chr1 | -	IR	11709584:11709931-11709931:11710022-11710022:11710131	11709584:11710131	0.169	0.1458	1	0.586
COAD	TCGA-CK-5912-01A-11R-1653-07.71704004-c6ff-403f-9480-4a25dd087bee.aligned		intron_retention_8113	FBXO2	ENSG00000116661.9	chr1 | -	IR	11709584:11709931-11709931:11710022-11710022:11710131	11709584:11710131	0.169	0.1458	1	0.586
COAD	TCGA-CK-5913-01A-11R-1653-07.6dca96d6-fdfa-4f4d-91d4-f29ad13c959f.aligned		intron_retention_8113	FBXO2	ENSG00000116661.9	chr1 | -	IR	11709584:11709931-11709931:11710022-11710022:11710131	11709584:11710131	0.169	0.1458	1	0.586
COAD	TCGA-CK-5914-01A-11R-1653-07.9d0e5f4b-9121-417f-bfa7-6abbfcecc2c9.aligned		intron_retention_8113	FBXO2	ENSG00000116661.9	chr1 | -	IR	11709584:11709931-11709931:11710022-11710022:11710131	11709584:11710131	0.169	0.1458	1	0.586
COAD	TCGA-CK-5915-01A-11R-1653-07.7ac6df66-aaf9-4347-8a32-a23147f58acf.aligned		intron_retention_8113	FBXO2	ENSG00000116661.9	chr1 | -	IR	11709584:11709931-11709931:11710022-11710022:11710131	11709584:11710131	0.169	0.1458	1	0.586
COAD	TCGA-CK-5916-01A-11R-1653-07.9043031b-caea-441e-8187-34f63ab36978.aligned		intron_retention_8113	FBXO2	ENSG00000116661.9	chr1 | -	IR	11709584:11709931-11709931:11710022-11710022:11710131	11709584:11710131	0.169	0.1458	1	0.586
COAD	TCGA-CK-6746-01A-11R-1839-07.9ce14e45-f554-4ce7-9f35-d4698c8dbb31.aligned	1	intron_retention_8113	FBXO2	ENSG00000116661.9	chr1 | -	IR	11709584:11709931-11709931:11710022-11710022:11710131	11709584:11710131	0.169	0.1458	1	0.586
COAD	TCGA-CK-6747-01A-11R-1839-07.29845441-a5c0-4081-bb42-63c6ff483849.aligned		intron_retention_8113	FBXO2	ENSG00000116661.9	chr1 | -	IR	11709584:11709931-11709931:11710022-11710022:11710131	11709584:11710131	0.169	0.1458	1	0.586
COAD	TCGA-CK-6748-01A-11R-1839-07.d7f5f29d-7f8c-4746-aa05-cf9803ee3e9e.aligned	1	intron_retention_8113	FBXO2	ENSG00000116661.9	chr1 | -	IR	11709584:11709931-11709931:11710022-11710022:11710131	11709584:11710131	0.169	0.1458	1	0.586
COAD	TCGA-CK-6751-01A-11R-1839-07.3da331ff-7e07-4aa6-bdf0-1afd8c479980.aligned		intron_retention_8113	FBXO2	ENSG00000116661.9	chr1 | -	IR	11709584:11709931-11709931:11710022-11710022:11710131	11709584:11710131	0.169	0.1458	1	0.586
COAD	TCGA-CM-4743-01A-01R-1723-07.8f8b493a-366c-4961-9586-bbc80878d91b.aligned		intron_retention_8113	FBXO2	ENSG00000116661.9	chr1 | -	IR	11709584:11709931-11709931:11710022-11710022:11710131	11709584:11710131	0.169	0.1458	1	0.586
COAD	TCGA-CM-4744-01A-01R-A32Z-07.cbf0b795-ee73-4508-b82d-aab2b21a4f0e.aligned	0.69	intron_retention_8113	FBXO2	ENSG00000116661.9	chr1 | -	IR	11709584:11709931-11709931:11710022-11710022:11710131	11709584:11710131	0.169	0.1458	1	0.586
COAD	TCGA-CM-4751-01A-02R-1839-07.81ea1d15-ed50-4948-8ed8-aced012a582a.aligned		intron_retention_8113	FBXO2	ENSG00000116661.9	chr1 | -	IR	11709584:11709931-11709931:11710022-11710022:11710131	11709584:11710131	0.169	0.1458	1	0.586
COAD	TCGA-CM-5344-01A-21R-1723-07.7da31566-c632-479e-93d1-01488621c12b.aligned		intron_retention_8113	FBXO2	ENSG00000116661.9	chr1 | -	IR	11709584:11709931-11709931:11710022-11710022:11710131	11709584:11710131	0.169	0.1458	1	0.586
COAD	TCGA-CM-5348-01A-21R-1723-07.5e1e93f4-c5a1-4137-9ae2-4beff960b56e.aligned		intron_retention_8113	FBXO2	ENSG00000116661.9	chr1 | -	IR	11709584:11709931-11709931:11710022-11710022:11710131	11709584:11710131	0.169	0.1458	1	0.586
COAD	TCGA-CM-5349-01A-21R-1723-07.e5a1aad9-6d5d-4590-84b0-f719b7fb33a5.aligned		intron_retention_8113	FBXO2	ENSG00000116661.9	chr1 | -	IR	11709584:11709931-11709931:11710022-11710022:11710131	11709584:11710131	0.169	0.1458	1	0.586
COAD	TCGA-CM-5860-01A-01R-1653-07.6d731b41-f8d6-489f-a81c-a458b31e9043.aligned		intron_retention_8113	FBXO2	ENSG00000116661.9	chr1 | -	IR	11709584:11709931-11709931:11710022-11710022:11710131	11709584:11710131	0.169	0.1458	1	0.586
COAD	TCGA-CM-5861-01A-01R-1653-07.ecf0b608-fed2-4082-a936-8f9cf510be99.aligned		intron_retention_8113	FBXO2	ENSG00000116661.9	chr1 | -	IR	11709584:11709931-11709931:11710022-11710022:11710131	11709584:11710131	0.169	0.1458	1	0.586
COAD	TCGA-CM-5862-01A-01R-1653-07.2f31b846-4424-438e-b169-c1989b288920.aligned		intron_retention_8113	FBXO2	ENSG00000116661.9	chr1 | -	IR	11709584:11709931-11709931:11710022-11710022:11710131	11709584:11710131	0.169	0.1458	1	0.586
COAD	TCGA-CM-5863-01A-21R-1839-07.b404de5b-49c7-4ace-b423-6a46e6378d3e.aligned	1	intron_retention_8113	FBXO2	ENSG00000116661.9	chr1 | -	IR	11709584:11709931-11709931:11710022-11710022:11710131	11709584:11710131	0.169	0.1458	1	0.586
COAD	TCGA-CM-5864-01A-01R-1653-07.0cc201f9-d974-4441-b052-1fc4279131c8.aligned		intron_retention_8113	FBXO2	ENSG00000116661.9	chr1 | -	IR	11709584:11709931-11709931:11710022-11710022:11710131	11709584:11710131	0.169	0.1458	1	0.586
COAD	TCGA-CM-5868-01A-01R-1653-07.354e7bb8-0b64-40ad-ac20-af3dbacb8e16.aligned		intron_retention_8113	FBXO2	ENSG00000116661.9	chr1 | -	IR	11709584:11709931-11709931:11710022-11710022:11710131	11709584:11710131	0.169	0.1458	1	0.586
COAD	TCGA-CM-6161-01A-11R-1653-07.68ecb607-d2d8-452d-a58d-23c0831be131.aligned		intron_retention_8113	FBXO2	ENSG00000116661.9	chr1 | -	IR	11709584:11709931-11709931:11710022-11710022:11710131	11709584:11710131	0.169	0.1458	1	0.586
COAD	TCGA-CM-6162-01A-11R-1653-07.e4eaae39-90e1-4900-af4c-f9211149a4f5.aligned		intron_retention_8113	FBXO2	ENSG00000116661.9	chr1 | -	IR	11709584:11709931-11709931:11710022-11710022:11710131	11709584:11710131	0.169	0.1458	1	0.586
COAD	TCGA-CM-6163-01A-11R-1653-07.e931ef71-b983-438e-8fce-d08b3d37fb61.aligned		intron_retention_8113	FBXO2	ENSG00000116661.9	chr1 | -	IR	11709584:11709931-11709931:11710022-11710022:11710131	11709584:11710131	0.169	0.1458	1	0.586
COAD	TCGA-CM-6164-01A-11R-1653-07.aa380709-4475-4eca-904f-9cff28d4610b.aligned	0.661	intron_retention_8113	FBXO2	ENSG00000116661.9	chr1 | -	IR	11709584:11709931-11709931:11710022-11710022:11710131	11709584:11710131	0.169	0.1458	1	0.586
COAD	TCGA-CM-6165-01A-11R-1653-07.84834bf6-2a9c-4c2d-adcc-0e9a772c4cfe.aligned		intron_retention_8113	FBXO2	ENSG00000116661.9	chr1 | -	IR	11709584:11709931-11709931:11710022-11710022:11710131	11709584:11710131	0.169	0.1458	1	0.586
COAD	TCGA-CM-6166-01A-11R-1653-07.e11b286b-e614-4ab3-8ad0-002a183dcb94.aligned		intron_retention_8113	FBXO2	ENSG00000116661.9	chr1 | -	IR	11709584:11709931-11709931:11710022-11710022:11710131	11709584:11710131	0.169	0.1458	1	0.586
COAD	TCGA-CM-6167-01A-11R-1653-07.ce5ac357-df4c-4dc3-b899-55328a21dc18.aligned	1	intron_retention_8113	FBXO2	ENSG00000116661.9	chr1 | -	IR	11709584:11709931-11709931:11710022-11710022:11710131	11709584:11710131	0.169	0.1458	1	0.586
COAD	TCGA-CM-6168-01A-11R-1653-07.7dab0105-975d-459f-97d3-f1462afddd4d.aligned		intron_retention_8113	FBXO2	ENSG00000116661.9	chr1 | -	IR	11709584:11709931-11709931:11710022-11710022:11710131	11709584:11710131	0.169	0.1458	1	0.586
COAD	TCGA-CM-6169-01A-11R-1653-07.ee1ed607-fb29-4475-9767-37a80ec7cdcd.aligned		intron_retention_8113	FBXO2	ENSG00000116661.9	chr1 | -	IR	11709584:11709931-11709931:11710022-11710022:11710131	11709584:11710131	0.169	0.1458	1	0.586
COAD	TCGA-CM-6170-01A-11R-1653-07.a5315ab1-d2f9-4d83-a1d5-7c903573d695.aligned	1	intron_retention_8113	FBXO2	ENSG00000116661.9	chr1 | -	IR	11709584:11709931-11709931:11710022-11710022:11710131	11709584:11710131	0.169	0.1458	1	0.586
COAD	TCGA-CM-6171-01A-11R-1653-07.6bff2e04-5771-4e5e-a98e-b1e1e0cd1774.aligned		intron_retention_8113	FBXO2	ENSG00000116661.9	chr1 | -	IR	11709584:11709931-11709931:11710022-11710022:11710131	11709584:11710131	0.169	0.1458	1	0.586
COAD	TCGA-CM-6172-01A-11R-1653-07.3adb2bd1-1df6-4f20-b3d0-6ecb410505ea.aligned		intron_retention_8113	FBXO2	ENSG00000116661.9	chr1 | -	IR	11709584:11709931-11709931:11710022-11710022:11710131	11709584:11710131	0.169	0.1458	1	0.586
COAD	TCGA-CM-6674-01A-11R-1839-07.5fd05a9a-f767-443e-b91c-4b0d7eb81740.aligned		intron_retention_8113	FBXO2	ENSG00000116661.9	chr1 | -	IR	11709584:11709931-11709931:11710022-11710022:11710131	11709584:11710131	0.169	0.1458	1	0.586
COAD	TCGA-CM-6675-01A-11R-1839-07.ea7cf4ad-ec51-4734-b75e-aa196c870d24.aligned		intron_retention_8113	FBXO2	ENSG00000116661.9	chr1 | -	IR	11709584:11709931-11709931:11710022-11710022:11710131	11709584:11710131	0.169	0.1458	1	0.586
COAD	TCGA-CM-6676-01A-11R-1839-07.62a57095-75de-4282-86e7-16e71f24b874.aligned		intron_retention_8113	FBXO2	ENSG00000116661.9	chr1 | -	IR	11709584:11709931-11709931:11710022-11710022:11710131	11709584:11710131	0.169	0.1458	1	0.586
COAD	TCGA-CM-6677-01A-11R-1839-07.708058d8-a732-4852-b6fc-1b2fc36c58ff.aligned		intron_retention_8113	FBXO2	ENSG00000116661.9	chr1 | -	IR	11709584:11709931-11709931:11710022-11710022:11710131	11709584:11710131	0.169	0.1458	1	0.586
COAD	TCGA-CM-6678-01A-11R-1839-07.f929a4be-b527-4e99-9b29-ef28d62f0bbb.aligned		intron_retention_8113	FBXO2	ENSG00000116661.9	chr1 | -	IR	11709584:11709931-11709931:11710022-11710022:11710131	11709584:11710131	0.169	0.1458	1	0.586
COAD	TCGA-CM-6679-01A-11R-1839-07.e02bd3ae-f273-4ec0-b6a6-8e469c440b07.aligned		intron_retention_8113	FBXO2	ENSG00000116661.9	chr1 | -	IR	11709584:11709931-11709931:11710022-11710022:11710131	11709584:11710131	0.169	0.1458	1	0.586
COAD	TCGA-CM-6680-01A-11R-1839-07.a78a205c-0c7f-4e26-bff9-0de2501031db.aligned		intron_retention_8113	FBXO2	ENSG00000116661.9	chr1 | -	IR	11709584:11709931-11709931:11710022-11710022:11710131	11709584:11710131	0.169	0.1458	1	0.586
COAD	TCGA-D5-5537-01A-21R-1928-07.712f8dd6-0b5f-49f1-8fd1-d220d1e174cd.aligned		intron_retention_8113	FBXO2	ENSG00000116661.9	chr1 | -	IR	11709584:11709931-11709931:11710022-11710022:11710131	11709584:11710131	0.169	0.1458	1	0.586
COAD	TCGA-D5-5538-01A-01R-1653-07.ab83c3ff-29a1-422c-89fb-2c815de358cd.aligned		intron_retention_8113	FBXO2	ENSG00000116661.9	chr1 | -	IR	11709584:11709931-11709931:11710022-11710022:11710131	11709584:11710131	0.169	0.1458	1	0.586
COAD	TCGA-D5-5539-01A-01R-1653-07.e4a168d2-b3ca-47c3-af94-93c4a6d90560.aligned		intron_retention_8113	FBXO2	ENSG00000116661.9	chr1 | -	IR	11709584:11709931-11709931:11710022-11710022:11710131	11709584:11710131	0.169	0.1458	1	0.586
COAD	TCGA-D5-5540-01A-01R-1653-07.f686cc71-5307-49cc-a421-27816e0dc7ae.aligned		intron_retention_8113	FBXO2	ENSG00000116661.9	chr1 | -	IR	11709584:11709931-11709931:11710022-11710022:11710131	11709584:11710131	0.169	0.1458	1	0.586
COAD	TCGA-D5-5541-01A-01R-1653-07.d6ef59bf-3da0-4399-842c-3067f53d2f4f.aligned	1	intron_retention_8113	FBXO2	ENSG00000116661.9	chr1 | -	IR	11709584:11709931-11709931:11710022-11710022:11710131	11709584:11710131	0.169	0.1458	1	0.586
COAD	TCGA-D5-6529-01A-11R-1774-07.1cbed3e0-7270-491c-90fa-aa54a92753f9.aligned	1	intron_retention_8113	FBXO2	ENSG00000116661.9	chr1 | -	IR	11709584:11709931-11709931:11710022-11710022:11710131	11709584:11710131	0.169	0.1458	1	0.586
COAD	TCGA-D5-6530-01A-11R-1723-07.c479f86b-22b4-420d-9177-91551f60a907.aligned		intron_retention_8113	FBXO2	ENSG00000116661.9	chr1 | -	IR	11709584:11709931-11709931:11710022-11710022:11710131	11709584:11710131	0.169	0.1458	1	0.586
COAD	TCGA-D5-6531-01A-11R-1723-07.ec575115-1302-4b57-afc0-8dcbb47c0b41.aligned		intron_retention_8113	FBXO2	ENSG00000116661.9	chr1 | -	IR	11709584:11709931-11709931:11710022-11710022:11710131	11709584:11710131	0.169	0.1458	1	0.586
COAD	TCGA-D5-6532-01A-11R-1723-07.fa279a9c-78d8-4727-a559-b7eca7a119b8.aligned		intron_retention_8113	FBXO2	ENSG00000116661.9	chr1 | -	IR	11709584:11709931-11709931:11710022-11710022:11710131	11709584:11710131	0.169	0.1458	1	0.586
COAD	TCGA-D5-6533-01A-11R-1723-07.bec98631-8daf-4f90-a095-485b8078e4d6.aligned		intron_retention_8113	FBXO2	ENSG00000116661.9	chr1 | -	IR	11709584:11709931-11709931:11710022-11710022:11710131	11709584:11710131	0.169	0.1458	1	0.586
COAD	TCGA-D5-6534-01A-21R-1928-07.a323e90d-02b3-4f8f-8d70-f3ca2957e4d5.aligned		intron_retention_8113	FBXO2	ENSG00000116661.9	chr1 | -	IR	11709584:11709931-11709931:11710022-11710022:11710131	11709584:11710131	0.169	0.1458	1	0.586
COAD	TCGA-D5-6535-01A-11R-1723-07.2f165c52-b5b5-4c07-8048-1f1b32faa7c3.aligned		intron_retention_8113	FBXO2	ENSG00000116661.9	chr1 | -	IR	11709584:11709931-11709931:11710022-11710022:11710131	11709584:11710131	0.169	0.1458	1	0.586
COAD	TCGA-D5-6536-01A-11R-1723-07.24be3a59-8143-4138-bc1a-942944061447.aligned		intron_retention_8113	FBXO2	ENSG00000116661.9	chr1 | -	IR	11709584:11709931-11709931:11710022-11710022:11710131	11709584:11710131	0.169	0.1458	1	0.586
COAD	TCGA-D5-6537-01A-11R-1723-07.95f8c3eb-2072-4fa1-bcdf-3403580f1a0c.aligned		intron_retention_8113	FBXO2	ENSG00000116661.9	chr1 | -	IR	11709584:11709931-11709931:11710022-11710022:11710131	11709584:11710131	0.169	0.1458	1	0.586
COAD	TCGA-D5-6538-01A-11R-1723-07.745e0cd1-721b-4598-b560-3efdccaa854f.aligned		intron_retention_8113	FBXO2	ENSG00000116661.9	chr1 | -	IR	11709584:11709931-11709931:11710022-11710022:11710131	11709584:11710131	0.169	0.1458	1	0.586
COAD	TCGA-D5-6539-01A-11R-1723-07.ea40f663-3f52-4efe-98a4-7fe321aa4964.aligned		intron_retention_8113	FBXO2	ENSG00000116661.9	chr1 | -	IR	11709584:11709931-11709931:11710022-11710022:11710131	11709584:11710131	0.169	0.1458	1	0.586
COAD	TCGA-D5-6540-01A-11R-1723-07.0e3fb123-3857-43d4-8ba7-46412571ccdf.aligned		intron_retention_8113	FBXO2	ENSG00000116661.9	chr1 | -	IR	11709584:11709931-11709931:11710022-11710022:11710131	11709584:11710131	0.169	0.1458	1	0.586
COAD	TCGA-D5-6541-01A-11R-1723-07.f7fb5192-be86-40e7-b7dc-19896b0058b6.aligned	1	intron_retention_8113	FBXO2	ENSG00000116661.9	chr1 | -	IR	11709584:11709931-11709931:11710022-11710022:11710131	11709584:11710131	0.169	0.1458	1	0.586
COAD	TCGA-D5-6898-01A-11R-1928-07.e647189e-6d18-47ff-a7dd-2419407f51f9.aligned	1	intron_retention_8113	FBXO2	ENSG00000116661.9	chr1 | -	IR	11709584:11709931-11709931:11710022-11710022:11710131	11709584:11710131	0.169	0.1458	1	0.586
COAD	TCGA-D5-6920-01A-11R-1928-07.c71d1986-7539-4044-a257-4018fb985107.aligned		intron_retention_8113	FBXO2	ENSG00000116661.9	chr1 | -	IR	11709584:11709931-11709931:11710022-11710022:11710131	11709584:11710131	0.169	0.1458	1	0.586
COAD	TCGA-D5-6922-01A-11R-1928-07.f2bc7947-a557-4bdf-a777-71bd3a63b23d.aligned		intron_retention_8113	FBXO2	ENSG00000116661.9	chr1 | -	IR	11709584:11709931-11709931:11710022-11710022:11710131	11709584:11710131	0.169	0.1458	1	0.586
COAD	TCGA-D5-6923-01A-11R-A32Z-07.3e24a094-75e7-4965-9299-2bfd09f9dac4.aligned	1	intron_retention_8113	FBXO2	ENSG00000116661.9	chr1 | -	IR	11709584:11709931-11709931:11710022-11710022:11710131	11709584:11710131	0.169	0.1458	1	0.586
COAD	TCGA-D5-6924-01A-11R-1928-07.a08a4bad-be55-45b1-b4a9-c447ecc3fbd5.aligned	1	intron_retention_8113	FBXO2	ENSG00000116661.9	chr1 | -	IR	11709584:11709931-11709931:11710022-11710022:11710131	11709584:11710131	0.169	0.1458	1	0.586
COAD	TCGA-D5-6926-01A-11R-1928-07.bac7f8ed-938d-4827-8180-d06ce460aa61.aligned		intron_retention_8113	FBXO2	ENSG00000116661.9	chr1 | -	IR	11709584:11709931-11709931:11710022-11710022:11710131	11709584:11710131	0.169	0.1458	1	0.586
COAD	TCGA-D5-6927-01A-21R-1928-07.b84b00dc-8f6c-4fed-b820-62b7f38a5376.aligned		intron_retention_8113	FBXO2	ENSG00000116661.9	chr1 | -	IR	11709584:11709931-11709931:11710022-11710022:11710131	11709584:11710131	0.169	0.1458	1	0.586
COAD	TCGA-D5-6928-01A-11R-1928-07.64bf47b5-577f-4ce2-a6e3-374a35f9a58f.aligned		intron_retention_8113	FBXO2	ENSG00000116661.9	chr1 | -	IR	11709584:11709931-11709931:11710022-11710022:11710131	11709584:11710131	0.169	0.1458	1	0.586
COAD	TCGA-D5-6929-01A-31R-1928-07.d848fe92-a3fc-43a1-98e7-43e31155f27e.aligned		intron_retention_8113	FBXO2	ENSG00000116661.9	chr1 | -	IR	11709584:11709931-11709931:11710022-11710022:11710131	11709584:11710131	0.169	0.1458	1	0.586
COAD	TCGA-D5-6930-01A-11R-1928-07.9acea60b-7f25-4abe-97a0-379c90922d72.aligned		intron_retention_8113	FBXO2	ENSG00000116661.9	chr1 | -	IR	11709584:11709931-11709931:11710022-11710022:11710131	11709584:11710131	0.169	0.1458	1	0.586
COAD	TCGA-D5-6931-01A-11R-1928-07.3b71298e-c66e-475d-8288-b9f17bda152d.aligned		intron_retention_8113	FBXO2	ENSG00000116661.9	chr1 | -	IR	11709584:11709931-11709931:11710022-11710022:11710131	11709584:11710131	0.169	0.1458	1	0.586
COAD	TCGA-D5-6932-01A-11R-1928-07.675ed4f5-0060-4e84-81b7-31814e9c2fa5.aligned		intron_retention_8113	FBXO2	ENSG00000116661.9	chr1 | -	IR	11709584:11709931-11709931:11710022-11710022:11710131	11709584:11710131	0.169	0.1458	1	0.586
COAD	TCGA-D5-7000-01A-11R-A32Z-07.c673cfcd-b99f-4c5d-a2db-5d0f360b8723.aligned		intron_retention_8113	FBXO2	ENSG00000116661.9	chr1 | -	IR	11709584:11709931-11709931:11710022-11710022:11710131	11709584:11710131	0.169	0.1458	1	0.586
COAD	TCGA-DM-A0X9-01A-11R-A155-07.cbd09825-5118-4f55-b032-efced3e3699a.aligned		intron_retention_8113	FBXO2	ENSG00000116661.9	chr1 | -	IR	11709584:11709931-11709931:11710022-11710022:11710131	11709584:11710131	0.169	0.1458	1	0.586
COAD	TCGA-DM-A0XD-01A-12R-A155-07.75871924-05ce-4e57-8b04-74093b412822.aligned		intron_retention_8113	FBXO2	ENSG00000116661.9	chr1 | -	IR	11709584:11709931-11709931:11710022-11710022:11710131	11709584:11710131	0.169	0.1458	1	0.586
COAD	TCGA-DM-A0XF-01A-11R-A155-07.edb12ff7-a099-4b48-a734-eee8e6e1b6a7.aligned	0.697	intron_retention_8113	FBXO2	ENSG00000116661.9	chr1 | -	IR	11709584:11709931-11709931:11710022-11710022:11710131	11709584:11710131	0.169	0.1458	1	0.586
COAD	TCGA-DM-A1D0-01A-11R-A155-07.801bb661-2677-48a6-80b9-de57224cf5ef.aligned	1	intron_retention_8113	FBXO2	ENSG00000116661.9	chr1 | -	IR	11709584:11709931-11709931:11710022-11710022:11710131	11709584:11710131	0.169	0.1458	1	0.586
COAD	TCGA-DM-A1D4-01A-21R-A155-07.61e7bd27-eded-4508-932a-dedef832192b.aligned		intron_retention_8113	FBXO2	ENSG00000116661.9	chr1 | -	IR	11709584:11709931-11709931:11710022-11710022:11710131	11709584:11710131	0.169	0.1458	1	0.586
COAD	TCGA-DM-A1D6-01A-21R-A155-07.11288911-ed89-4dfb-9850-01d3e5438b5d.aligned		intron_retention_8113	FBXO2	ENSG00000116661.9	chr1 | -	IR	11709584:11709931-11709931:11710022-11710022:11710131	11709584:11710131	0.169	0.1458	1	0.586
COAD	TCGA-DM-A1D7-01A-11R-A155-07.06c5b3d6-24c7-4d53-8871-7a9b19377c20.aligned	1	intron_retention_8113	FBXO2	ENSG00000116661.9	chr1 | -	IR	11709584:11709931-11709931:11710022-11710022:11710131	11709584:11710131	0.169	0.1458	1	0.586
COAD	TCGA-DM-A1D8-01A-11R-A155-07.7ff4a152-f31d-43c5-bdda-3b95d6972652.aligned		intron_retention_8113	FBXO2	ENSG00000116661.9	chr1 | -	IR	11709584:11709931-11709931:11710022-11710022:11710131	11709584:11710131	0.169	0.1458	1	0.586
COAD	TCGA-DM-A1D9-01A-11R-A155-07.15907695-4f7d-4e7c-a4d3-ca016c72ebba.aligned		intron_retention_8113	FBXO2	ENSG00000116661.9	chr1 | -	IR	11709584:11709931-11709931:11710022-11710022:11710131	11709584:11710131	0.169	0.1458	1	0.586
COAD	TCGA-DM-A1DA-01A-11R-A155-07.7c2ff08a-754f-4e76-9c9b-3ce02248d2e6.aligned		intron_retention_8113	FBXO2	ENSG00000116661.9	chr1 | -	IR	11709584:11709931-11709931:11710022-11710022:11710131	11709584:11710131	0.169	0.1458	1	0.586
COAD	TCGA-DM-A1DB-01A-11R-A155-07.fbf405c9-b3de-4e77-b7c2-b97dc8e90e76.aligned		intron_retention_8113	FBXO2	ENSG00000116661.9	chr1 | -	IR	11709584:11709931-11709931:11710022-11710022:11710131	11709584:11710131	0.169	0.1458	1	0.586
COAD	TCGA-DM-A1HA-01A-11R-A155-07.13865eea-785e-48f0-8b1e-7457f6a91649.aligned	0.689	intron_retention_8113	FBXO2	ENSG00000116661.9	chr1 | -	IR	11709584:11709931-11709931:11710022-11710022:11710131	11709584:11710131	0.169	0.1458	1	0.586
COAD	TCGA-DM-A1HB-01A-21R-A180-07.682139cf-a3bd-4caf-bddc-5b1f3250f8f0.aligned		intron_retention_8113	FBXO2	ENSG00000116661.9	chr1 | -	IR	11709584:11709931-11709931:11710022-11710022:11710131	11709584:11710131	0.169	0.1458	1	0.586
COAD	TCGA-DM-A280-01A-12R-A16W-07.575b0136-4ffe-4ecc-8967-4e5af3c3c8ec.aligned		intron_retention_8113	FBXO2	ENSG00000116661.9	chr1 | -	IR	11709584:11709931-11709931:11710022-11710022:11710131	11709584:11710131	0.169	0.1458	1	0.586
COAD	TCGA-DM-A282-01A-12R-A16W-07.a75e2b44-3976-411b-9696-25ed76c1faee.aligned		intron_retention_8113	FBXO2	ENSG00000116661.9	chr1 | -	IR	11709584:11709931-11709931:11710022-11710022:11710131	11709584:11710131	0.169	0.1458	1	0.586
COAD	TCGA-DM-A285-01A-11R-A16W-07.5f6fb619-ac35-4806-88e7-0f5d90c64fd1.aligned		intron_retention_8113	FBXO2	ENSG00000116661.9	chr1 | -	IR	11709584:11709931-11709931:11710022-11710022:11710131	11709584:11710131	0.169	0.1458	1	0.586
COAD	TCGA-DM-A288-01A-11R-A16W-07.36e38aab-6d36-496d-bba6-5f4393c33e33.aligned		intron_retention_8113	FBXO2	ENSG00000116661.9	chr1 | -	IR	11709584:11709931-11709931:11710022-11710022:11710131	11709584:11710131	0.169	0.1458	1	0.586
COAD	TCGA-DM-A28A-01A-21R-A32Y-07.d7632cab-ab0e-4a4c-a051-0bb8965918ff.aligned		intron_retention_8113	FBXO2	ENSG00000116661.9	chr1 | -	IR	11709584:11709931-11709931:11710022-11710022:11710131	11709584:11710131	0.169	0.1458	1	0.586
COAD	TCGA-DM-A28C-01A-11R-A32Y-07.0931a992-b009-4174-8017-a96295f2f447.aligned		intron_retention_8113	FBXO2	ENSG00000116661.9	chr1 | -	IR	11709584:11709931-11709931:11710022-11710022:11710131	11709584:11710131	0.169	0.1458	1	0.586
COAD	TCGA-DM-A28E-01A-11R-A32Y-07.26aac147-be13-44e0-9bc5-74366c01f726.aligned	1	intron_retention_8113	FBXO2	ENSG00000116661.9	chr1 | -	IR	11709584:11709931-11709931:11710022-11710022:11710131	11709584:11710131	0.169	0.1458	1	0.586
COAD	TCGA-DM-A28F-01A-11R-A32Y-07.9c737eba-552c-4952-aa86-6c54edad4fb1.aligned		intron_retention_8113	FBXO2	ENSG00000116661.9	chr1 | -	IR	11709584:11709931-11709931:11710022-11710022:11710131	11709584:11710131	0.169	0.1458	1	0.586
COAD	TCGA-DM-A28G-01A-11R-A16W-07.fac5986e-a117-420a-8108-655b0d7d39d6.aligned		intron_retention_8113	FBXO2	ENSG00000116661.9	chr1 | -	IR	11709584:11709931-11709931:11710022-11710022:11710131	11709584:11710131	0.169	0.1458	1	0.586
COAD	TCGA-DM-A28H-01A-11R-A16W-07.26b0c513-5897-4611-b94f-d6fbc1c508e5.aligned		intron_retention_8113	FBXO2	ENSG00000116661.9	chr1 | -	IR	11709584:11709931-11709931:11710022-11710022:11710131	11709584:11710131	0.169	0.1458	1	0.586
COAD	TCGA-DM-A28K-01A-21R-A32Y-07.ff72e5af-02df-4b5c-ac80-69551c78ac73.aligned		intron_retention_8113	FBXO2	ENSG00000116661.9	chr1 | -	IR	11709584:11709931-11709931:11710022-11710022:11710131	11709584:11710131	0.169	0.1458	1	0.586
COAD	TCGA-DM-A28M-01A-12R-A16W-07.254a13a2-1e25-46d5-a70e-805da1fed514.aligned		intron_retention_8113	FBXO2	ENSG00000116661.9	chr1 | -	IR	11709584:11709931-11709931:11710022-11710022:11710131	11709584:11710131	0.169	0.1458	1	0.586
COAD	TCGA-F4-6459-01A-11R-1774-07.1315e98d-1927-4702-9132-e02e56b2d2f1.aligned	0.628	intron_retention_8113	FBXO2	ENSG00000116661.9	chr1 | -	IR	11709584:11709931-11709931:11710022-11710022:11710131	11709584:11710131	0.169	0.1458	1	0.586
COAD	TCGA-F4-6460-01A-11R-1774-07.61df6b3d-4a00-4b56-989d-f01d4850a4d9.aligned		intron_retention_8113	FBXO2	ENSG00000116661.9	chr1 | -	IR	11709584:11709931-11709931:11710022-11710022:11710131	11709584:11710131	0.169	0.1458	1	0.586
COAD	TCGA-F4-6461-01A-11R-1774-07.7a9961f7-5d9e-47e6-9ccb-7642f01083d5.aligned		intron_retention_8113	FBXO2	ENSG00000116661.9	chr1 | -	IR	11709584:11709931-11709931:11710022-11710022:11710131	11709584:11710131	0.169	0.1458	1	0.586
COAD	TCGA-F4-6463-01A-11R-1723-07.04c767c7-f458-4610-880f-1fc5424170fa.aligned		intron_retention_8113	FBXO2	ENSG00000116661.9	chr1 | -	IR	11709584:11709931-11709931:11710022-11710022:11710131	11709584:11710131	0.169	0.1458	1	0.586
COAD	TCGA-F4-6569-01A-11R-1774-07.37e5e5de-8f04-4123-ab14-213e1a569f72.aligned		intron_retention_8113	FBXO2	ENSG00000116661.9	chr1 | -	IR	11709584:11709931-11709931:11710022-11710022:11710131	11709584:11710131	0.169	0.1458	1	0.586
COAD	TCGA-F4-6570-01A-11R-1774-07.e2a5570a-2ef4-4e5b-9a70-eee96b1aedf9.aligned		intron_retention_8113	FBXO2	ENSG00000116661.9	chr1 | -	IR	11709584:11709931-11709931:11710022-11710022:11710131	11709584:11710131	0.169	0.1458	1	0.586
COAD	TCGA-F4-6704-01A-11R-1839-07.cada672a-6826-4fa4-8e96-73c11844bfee.aligned		intron_retention_8113	FBXO2	ENSG00000116661.9	chr1 | -	IR	11709584:11709931-11709931:11710022-11710022:11710131	11709584:11710131	0.169	0.1458	1	0.586
COAD	TCGA-F4-6704-11A-01R-1839-07.724fedca-f875-401a-9b21-cbcd86002200.aligned		intron_retention_8113	FBXO2	ENSG00000116661.9	chr1 | -	IR	11709584:11709931-11709931:11710022-11710022:11710131	11709584:11710131	0.169	0.1458	1	0.586
COAD	TCGA-F4-6805-01A-11R-1839-07.a831e365-7d70-4a0b-9567-3b8cdc0fc0b0.aligned		intron_retention_8113	FBXO2	ENSG00000116661.9	chr1 | -	IR	11709584:11709931-11709931:11710022-11710022:11710131	11709584:11710131	0.169	0.1458	1	0.586
COAD	TCGA-F4-6806-01A-11R-1839-07.063ab4f7-2fb9-4e6e-9d47-c1199ba8d9a3.aligned		intron_retention_8113	FBXO2	ENSG00000116661.9	chr1 | -	IR	11709584:11709931-11709931:11710022-11710022:11710131	11709584:11710131	0.169	0.1458	1	0.586
COAD	TCGA-F4-6807-01A-11R-1839-07.8220b852-fe5f-4dcb-bd92-bfee5147cacf.aligned		intron_retention_8113	FBXO2	ENSG00000116661.9	chr1 | -	IR	11709584:11709931-11709931:11710022-11710022:11710131	11709584:11710131	0.169	0.1458	1	0.586
COAD	TCGA-F4-6808-01A-11R-1839-07.26845d5b-60cb-49f5-b9bc-d1655e13800f.aligned	1	intron_retention_8113	FBXO2	ENSG00000116661.9	chr1 | -	IR	11709584:11709931-11709931:11710022-11710022:11710131	11709584:11710131	0.169	0.1458	1	0.586
COAD	TCGA-F4-6809-01A-11R-1839-07.79f250ad-7fd9-4f38-b867-dee4c2f45072.aligned		intron_retention_8113	FBXO2	ENSG00000116661.9	chr1 | -	IR	11709584:11709931-11709931:11710022-11710022:11710131	11709584:11710131	0.169	0.1458	1	0.586
COAD	TCGA-F4-6854-01A-11R-1928-07.523f117f-e6a5-401d-80c4-834a20229618.aligned	1	intron_retention_8113	FBXO2	ENSG00000116661.9	chr1 | -	IR	11709584:11709931-11709931:11710022-11710022:11710131	11709584:11710131	0.169	0.1458	1	0.586
COAD	TCGA-F4-6855-01A-11R-1928-07.b91e601e-6aaa-4ad9-86c9-92f96bb2c6fe.aligned		intron_retention_8113	FBXO2	ENSG00000116661.9	chr1 | -	IR	11709584:11709931-11709931:11710022-11710022:11710131	11709584:11710131	0.169	0.1458	1	0.586
COAD	TCGA-F4-6856-01A-11R-1928-07.f9410d08-1525-4bf7-9c7c-939a2abe60ae.aligned		intron_retention_8113	FBXO2	ENSG00000116661.9	chr1 | -	IR	11709584:11709931-11709931:11710022-11710022:11710131	11709584:11710131	0.169	0.1458	1	0.586
COAD	TCGA-G4-6293-01A-11R-1723-07.a2ce6ade-bf78-481f-a75f-22f731abc9ca.aligned		intron_retention_8113	FBXO2	ENSG00000116661.9	chr1 | -	IR	11709584:11709931-11709931:11710022-11710022:11710131	11709584:11710131	0.169	0.1458	1	0.586
COAD	TCGA-G4-6294-01A-11R-1774-07.322cb03d-69ba-4015-888f-330ced0b4600.aligned		intron_retention_8113	FBXO2	ENSG00000116661.9	chr1 | -	IR	11709584:11709931-11709931:11710022-11710022:11710131	11709584:11710131	0.169	0.1458	1	0.586
COAD	TCGA-G4-6295-01A-11R-1723-07.c809549e-bd06-4b47-a3ff-dd2dbb2dfd2c.aligned	1	intron_retention_8113	FBXO2	ENSG00000116661.9	chr1 | -	IR	11709584:11709931-11709931:11710022-11710022:11710131	11709584:11710131	0.169	0.1458	1	0.586
COAD	TCGA-G4-6297-01A-11R-1723-07.ee2d17da-c7dd-4240-a45f-23e52418be3a.aligned		intron_retention_8113	FBXO2	ENSG00000116661.9	chr1 | -	IR	11709584:11709931-11709931:11710022-11710022:11710131	11709584:11710131	0.169	0.1458	1	0.586
COAD	TCGA-G4-6298-01A-11R-1723-07.d2580e75-3a28-443d-916e-d689f97d6962.aligned		intron_retention_8113	FBXO2	ENSG00000116661.9	chr1 | -	IR	11709584:11709931-11709931:11710022-11710022:11710131	11709584:11710131	0.169	0.1458	1	0.586
COAD	TCGA-G4-6299-01A-11R-1774-07.c6312f6d-cc5f-4a05-a9de-e1063505d29b.aligned	0.665	intron_retention_8113	FBXO2	ENSG00000116661.9	chr1 | -	IR	11709584:11709931-11709931:11710022-11710022:11710131	11709584:11710131	0.169	0.1458	1	0.586
COAD	TCGA-G4-6302-01A-11R-1723-07.f1e06c46-dbe7-4e9c-9a9b-e37e9d5b8deb.aligned		intron_retention_8113	FBXO2	ENSG00000116661.9	chr1 | -	IR	11709584:11709931-11709931:11710022-11710022:11710131	11709584:11710131	0.169	0.1458	1	0.586
COAD	TCGA-G4-6303-01A-11R-1774-07.9b00f3e1-6d27-47d6-b9ce-1389db097741.aligned		intron_retention_8113	FBXO2	ENSG00000116661.9	chr1 | -	IR	11709584:11709931-11709931:11710022-11710022:11710131	11709584:11710131	0.169	0.1458	1	0.586
COAD	TCGA-G4-6304-01A-11R-1928-07.e578bc5f-42e0-488e-9c6a-f017c455ef4d.aligned		intron_retention_8113	FBXO2	ENSG00000116661.9	chr1 | -	IR	11709584:11709931-11709931:11710022-11710022:11710131	11709584:11710131	0.169	0.1458	1	0.586
COAD	TCGA-G4-6306-01A-11R-1774-07.1606ec0c-34b0-4950-a004-79f7e19600e9.aligned		intron_retention_8113	FBXO2	ENSG00000116661.9	chr1 | -	IR	11709584:11709931-11709931:11710022-11710022:11710131	11709584:11710131	0.169	0.1458	1	0.586
COAD	TCGA-G4-6307-01A-11R-1723-07.9e8f4ed7-78c0-436a-9333-5fb281fda266.aligned	1	intron_retention_8113	FBXO2	ENSG00000116661.9	chr1 | -	IR	11709584:11709931-11709931:11710022-11710022:11710131	11709584:11710131	0.169	0.1458	1	0.586
COAD	TCGA-G4-6309-01A-21R-1839-07.5ad175e7-8649-4ccc-91a1-b10dc8cfa642.aligned		intron_retention_8113	FBXO2	ENSG00000116661.9	chr1 | -	IR	11709584:11709931-11709931:11710022-11710022:11710131	11709584:11710131	0.169	0.1458	1	0.586
COAD	TCGA-G4-6310-01A-11R-1723-07.0dc7cb6e-bb27-4da5-90ed-c062dc9fda0b.aligned		intron_retention_8113	FBXO2	ENSG00000116661.9	chr1 | -	IR	11709584:11709931-11709931:11710022-11710022:11710131	11709584:11710131	0.169	0.1458	1	0.586
COAD	TCGA-G4-6311-01A-11R-1723-07.e35d643d-003d-4eed-88ce-65b7d4ba5a92.aligned	1	intron_retention_8113	FBXO2	ENSG00000116661.9	chr1 | -	IR	11709584:11709931-11709931:11710022-11710022:11710131	11709584:11710131	0.169	0.1458	1	0.586
COAD	TCGA-G4-6314-01A-11R-1723-07.a28a6e48-d0c8-434d-a9f6-22b7f6a44707.aligned		intron_retention_8113	FBXO2	ENSG00000116661.9	chr1 | -	IR	11709584:11709931-11709931:11710022-11710022:11710131	11709584:11710131	0.169	0.1458	1	0.586
COAD	TCGA-G4-6315-01A-11R-1723-07.4cca2f70-fb21-4bfa-b544-c8e7ff4cf58a.aligned		intron_retention_8113	FBXO2	ENSG00000116661.9	chr1 | -	IR	11709584:11709931-11709931:11710022-11710022:11710131	11709584:11710131	0.169	0.1458	1	0.586
COAD	TCGA-G4-6317-01A-11R-1723-07.578f08c1-84d4-4dea-8b0d-a41a803bb7ce.aligned		intron_retention_8113	FBXO2	ENSG00000116661.9	chr1 | -	IR	11709584:11709931-11709931:11710022-11710022:11710131	11709584:11710131	0.169	0.1458	1	0.586
COAD	TCGA-G4-6317-02A-11R-2066-07.1e909d80-d551-4f4e-be4d-822d9f0a8c8d.aligned	1	intron_retention_8113	FBXO2	ENSG00000116661.9	chr1 | -	IR	11709584:11709931-11709931:11710022-11710022:11710131	11709584:11710131	0.169	0.1458	1	0.586
COAD	TCGA-G4-6320-01A-11R-1723-07.e4a881ab-362f-4ddc-a80f-2d4eb2a96258.aligned		intron_retention_8113	FBXO2	ENSG00000116661.9	chr1 | -	IR	11709584:11709931-11709931:11710022-11710022:11710131	11709584:11710131	0.169	0.1458	1	0.586
COAD	TCGA-G4-6321-01A-11R-1723-07.58d47d74-8218-4ec8-9956-f737382d4f30.aligned		intron_retention_8113	FBXO2	ENSG00000116661.9	chr1 | -	IR	11709584:11709931-11709931:11710022-11710022:11710131	11709584:11710131	0.169	0.1458	1	0.586
COAD	TCGA-G4-6322-01A-11R-1723-07.a8a42f43-f83c-45a6-afb7-59e95aa24e8f.aligned		intron_retention_8113	FBXO2	ENSG00000116661.9	chr1 | -	IR	11709584:11709931-11709931:11710022-11710022:11710131	11709584:11710131	0.169	0.1458	1	0.586
COAD	TCGA-G4-6323-01A-11R-1723-07.7306af09-2f4d-43db-84d1-926c5f4e9d2a.aligned		intron_retention_8113	FBXO2	ENSG00000116661.9	chr1 | -	IR	11709584:11709931-11709931:11710022-11710022:11710131	11709584:11710131	0.169	0.1458	1	0.586
COAD	TCGA-G4-6586-01A-11R-1774-07.fd15315c-9915-4d4f-9bbc-90e7b9cd20ad.aligned		intron_retention_8113	FBXO2	ENSG00000116661.9	chr1 | -	IR	11709584:11709931-11709931:11710022-11710022:11710131	11709584:11710131	0.169	0.1458	1	0.586
COAD	TCGA-G4-6588-01A-11R-1774-07.0f849dcd-e50a-47a9-87e8-90687c2e9a9c.aligned		intron_retention_8113	FBXO2	ENSG00000116661.9	chr1 | -	IR	11709584:11709931-11709931:11710022-11710022:11710131	11709584:11710131	0.169	0.1458	1	0.586
COAD	TCGA-G4-6625-01A-21R-1774-07.a8bd3749-191b-4e70-9046-a0a2132fec94.aligned	1	intron_retention_8113	FBXO2	ENSG00000116661.9	chr1 | -	IR	11709584:11709931-11709931:11710022-11710022:11710131	11709584:11710131	0.169	0.1458	1	0.586
COAD	TCGA-G4-6626-01A-11R-1774-07.20a84f89-898c-413c-b4a4-47458ad958e4.aligned		intron_retention_8113	FBXO2	ENSG00000116661.9	chr1 | -	IR	11709584:11709931-11709931:11710022-11710022:11710131	11709584:11710131	0.169	0.1458	1	0.586
COAD	TCGA-G4-6627-01A-11R-1774-07.c4cf1805-5b53-4c99-acf4-9cf0fd813d88.aligned		intron_retention_8113	FBXO2	ENSG00000116661.9	chr1 | -	IR	11709584:11709931-11709931:11710022-11710022:11710131	11709584:11710131	0.169	0.1458	1	0.586
COAD	TCGA-G4-6628-01A-11R-1839-07.74f9b9ce-bdf9-455c-bcf5-3ea44c25f633.aligned		intron_retention_8113	FBXO2	ENSG00000116661.9	chr1 | -	IR	11709584:11709931-11709931:11710022-11710022:11710131	11709584:11710131	0.169	0.1458	1	0.586
COAD	TCGA-NH-A50T-01A-11R-A28H-07.47964b92-bd93-45b1-97c9-194da4c9dccb.aligned		intron_retention_8113	FBXO2	ENSG00000116661.9	chr1 | -	IR	11709584:11709931-11709931:11710022-11710022:11710131	11709584:11710131	0.169	0.1458	1	0.586
COAD	TCGA-NH-A50U-01A-33R-A37K-07.b2e2c315-da03-4a82-82c5-06343b7e0ad3.aligned		intron_retention_8113	FBXO2	ENSG00000116661.9	chr1 | -	IR	11709584:11709931-11709931:11710022-11710022:11710131	11709584:11710131	0.169	0.1458	1	0.586
COAD	TCGA-NH-A50V-01A-11R-A28H-07.b254c0ed-6844-4298-89a9-d436a0c38ca8.aligned		intron_retention_8113	FBXO2	ENSG00000116661.9	chr1 | -	IR	11709584:11709931-11709931:11710022-11710022:11710131	11709584:11710131	0.169	0.1458	1	0.586
COAD	TCGA-NH-A5IV-01A-42R-A37K-07.e19e34f1-f609-4cfc-8500-c013c270e81b.aligned		intron_retention_8113	FBXO2	ENSG00000116661.9	chr1 | -	IR	11709584:11709931-11709931:11710022-11710022:11710131	11709584:11710131	0.169	0.1458	1	0.586
COAD	TCGA-NH-A6GA-01A-11R-A37K-07.d6a97e51-7737-4ef4-82ff-f4e27a0bdd8e.aligned		intron_retention_8113	FBXO2	ENSG00000116661.9	chr1 | -	IR	11709584:11709931-11709931:11710022-11710022:11710131	11709584:11710131	0.169	0.1458	1	0.586
COAD	TCGA-NH-A6GB-01A-11R-A37K-07.5211d679-261f-4eda-ae1e-c4b33cbac9c3.aligned		intron_retention_8113	FBXO2	ENSG00000116661.9	chr1 | -	IR	11709584:11709931-11709931:11710022-11710022:11710131	11709584:11710131	0.169	0.1458	1	0.586
COAD	TCGA-NH-A6GC-01A-12R-A41B-07.11ab1458-48c5-4a78-be11-60093f5f47ad.aligned		intron_retention_8113	FBXO2	ENSG00000116661.9	chr1 | -	IR	11709584:11709931-11709931:11710022-11710022:11710131	11709584:11710131	0.169	0.1458	1	0.586
COAD	TCGA-NH-A8F7-01A-11R-A41B-07.412feaad-4ed9-48cc-9fb2-1a8515766d67.aligned	1	intron_retention_8113	FBXO2	ENSG00000116661.9	chr1 | -	IR	11709584:11709931-11709931:11710022-11710022:11710131	11709584:11710131	0.169	0.1458	1	0.586
COAD	TCGA-NH-A8F7-06A-31R-A41B-07.6b6d937b-c112-41d7-86ed-284bd580b425.aligned	0.754	intron_retention_8113	FBXO2	ENSG00000116661.9	chr1 | -	IR	11709584:11709931-11709931:11710022-11710022:11710131	11709584:11710131	0.169	0.1458	1	0.586
COAD	TCGA-NH-A8F8-01A-72R-A41B-07.d0520423-038d-4da6-923b-b76f7a55244a.aligned		intron_retention_8113	FBXO2	ENSG00000116661.9	chr1 | -	IR	11709584:11709931-11709931:11710022-11710022:11710131	11709584:11710131	0.169	0.1458	1	0.586
COAD	TCGA-QG-A5YV-01A-11R-A28H-07.9abef075-5168-4a66-9826-fd61c94b8f6d.aligned		intron_retention_8113	FBXO2	ENSG00000116661.9	chr1 | -	IR	11709584:11709931-11709931:11710022-11710022:11710131	11709584:11710131	0.169	0.1458	1	0.586
COAD	TCGA-QG-A5YW-01A-11R-A28H-07.52a9c93c-8753-4bfd-87d6-1a63a6e280af.aligned		intron_retention_8113	FBXO2	ENSG00000116661.9	chr1 | -	IR	11709584:11709931-11709931:11710022-11710022:11710131	11709584:11710131	0.169	0.1458	1	0.586
COAD	TCGA-QG-A5YX-01A-11R-A28H-07.e1522cf2-53d1-485b-bf05-0f06194da23e.aligned		intron_retention_8113	FBXO2	ENSG00000116661.9	chr1 | -	IR	11709584:11709931-11709931:11710022-11710022:11710131	11709584:11710131	0.169	0.1458	1	0.586
COAD	TCGA-QG-A5Z1-01A-11R-A28H-07.9276f521-eb07-4a11-a32a-f1f4e941ed7a.aligned		intron_retention_8113	FBXO2	ENSG00000116661.9	chr1 | -	IR	11709584:11709931-11709931:11710022-11710022:11710131	11709584:11710131	0.169	0.1458	1	0.586
COAD	TCGA-QG-A5Z2-01A-11R-A28H-07.66a1db87-e75c-403b-a923-97a0f9cd1720.aligned		intron_retention_8113	FBXO2	ENSG00000116661.9	chr1 | -	IR	11709584:11709931-11709931:11710022-11710022:11710131	11709584:11710131	0.169	0.1458	1	0.586
COAD	TCGA-QL-A97D-01A-12R-A41B-07.08f98061-6b1e-4059-b37a-fe45b1c8652b.aligned		intron_retention_8113	FBXO2	ENSG00000116661.9	chr1 | -	IR	11709584:11709931-11709931:11710022-11710022:11710131	11709584:11710131	0.169	0.1458	1	0.586
COAD	TCGA-RU-A8FL-01A-11R-A37K-07.77290f8d-daef-415e-8e3f-3406f2ab190e.aligned		intron_retention_8113	FBXO2	ENSG00000116661.9	chr1 | -	IR	11709584:11709931-11709931:11710022-11710022:11710131	11709584:11710131	0.169	0.1458	1	0.586
COAD	TCGA-SS-A7HO-01A-21R-A37K-07.71f3246a-0b7f-447e-8d1a-951159eb458e.aligned		intron_retention_8113	FBXO2	ENSG00000116661.9	chr1 | -	IR	11709584:11709931-11709931:11710022-11710022:11710131	11709584:11710131	0.169	0.1458	1	0.586
COAD	TCGA-T9-A92H-01A-11R-A37K-07.5b7b69e2-7656-47f2-b00f-06db08188c74.aligned		intron_retention_8113	FBXO2	ENSG00000116661.9	chr1 | -	IR	11709584:11709931-11709931:11710022-11710022:11710131	11709584:11710131	0.169	0.1458	1	0.586
COAD	TCGA-WS-AB45-01A-11R-A41B-07.751f3b6e-a9c0-4ad8-a8af-06b40d67159d.aligned		intron_retention_8113	FBXO2	ENSG00000116661.9	chr1 | -	IR	11709584:11709931-11709931:11710022-11710022:11710131	11709584:11710131	0.169	0.1458	1	0.586
BLCA	TCGA-2F-A9KO-01A-11R-A38B-07.689c1593-3903-4c82-9cb1-1471d8bca178.aligned		intron_retention_8113	FBXO2	ENSG00000116661.9	chr1 | -	IR	11709584:11709931-11709931:11710022-11710022:11710131	11709584:11710131	0.281	0.1074	1	0.445
BLCA	TCGA-2F-A9KP-01A-11R-A38B-07.c4cd3829-e7e0-4f1e-8796-856fddcf50ae.aligned		intron_retention_8113	FBXO2	ENSG00000116661.9	chr1 | -	IR	11709584:11709931-11709931:11710022-11710022:11710131	11709584:11710131	0.281	0.1074	1	0.445
BLCA	TCGA-2F-A9KQ-01A-11R-A38B-07.aa3e32f5-11ad-462a-aa5b-f477cfab3f4f.aligned	1	intron_retention_8113	FBXO2	ENSG00000116661.9	chr1 | -	IR	11709584:11709931-11709931:11710022-11710022:11710131	11709584:11710131	0.281	0.1074	1	0.445
BLCA	TCGA-2F-A9KR-01A-11R-A38B-07.a9321523-588e-40f2-95d2-2501fd1b23ee.aligned		intron_retention_8113	FBXO2	ENSG00000116661.9	chr1 | -	IR	11709584:11709931-11709931:11710022-11710022:11710131	11709584:11710131	0.281	0.1074	1	0.445
BLCA	TCGA-2F-A9KT-01A-11R-A38B-07.406a8f7c-1530-4ecf-95b0-b051d9a3184d.aligned		intron_retention_8113	FBXO2	ENSG00000116661.9	chr1 | -	IR	11709584:11709931-11709931:11710022-11710022:11710131	11709584:11710131	0.281	0.1074	1	0.445
BLCA	TCGA-2F-A9KW-01A-11R-A38B-07.88275e49-b282-414c-a941-9a77b991ff16.aligned		intron_retention_8113	FBXO2	ENSG00000116661.9	chr1 | -	IR	11709584:11709931-11709931:11710022-11710022:11710131	11709584:11710131	0.281	0.1074	1	0.445
BLCA	TCGA-4Z-AA7M-01A-11R-A39I-07.4cab604d-59f6-46d2-8c35-d3416977e313.aligned		intron_retention_8113	FBXO2	ENSG00000116661.9	chr1 | -	IR	11709584:11709931-11709931:11710022-11710022:11710131	11709584:11710131	0.281	0.1074	1	0.445
BLCA	TCGA-4Z-AA7N-01A-11R-A39I-07.45517ca1-d687-4f8a-90e4-0b3937221a00.aligned		intron_retention_8113	FBXO2	ENSG00000116661.9	chr1 | -	IR	11709584:11709931-11709931:11710022-11710022:11710131	11709584:11710131	0.281	0.1074	1	0.445
BLCA	TCGA-4Z-AA7O-01A-31R-A39I-07.fac0db5e-3c8c-4ca2-b119-da810af35fc7.aligned		intron_retention_8113	FBXO2	ENSG00000116661.9	chr1 | -	IR	11709584:11709931-11709931:11710022-11710022:11710131	11709584:11710131	0.281	0.1074	1	0.445
BLCA	TCGA-4Z-AA7Q-01A-11R-A39I-07.7d08924f-7f7e-48f2-80d6-275b4d964697.aligned		intron_retention_8113	FBXO2	ENSG00000116661.9	chr1 | -	IR	11709584:11709931-11709931:11710022-11710022:11710131	11709584:11710131	0.281	0.1074	1	0.445
BLCA	TCGA-4Z-AA7R-01A-11R-A39I-07.eac6c8bf-f85e-4eb7-a700-034cd91722d7.aligned		intron_retention_8113	FBXO2	ENSG00000116661.9	chr1 | -	IR	11709584:11709931-11709931:11710022-11710022:11710131	11709584:11710131	0.281	0.1074	1	0.445
BLCA	TCGA-4Z-AA7S-01A-11R-A39I-07.7046aa00-ff84-4ff4-9157-63b3b1d898df.aligned		intron_retention_8113	FBXO2	ENSG00000116661.9	chr1 | -	IR	11709584:11709931-11709931:11710022-11710022:11710131	11709584:11710131	0.281	0.1074	1	0.445
BLCA	TCGA-4Z-AA7Y-01A-11R-A39I-07.e189bbc1-0308-4f79-b296-01c4b38b8919.aligned		intron_retention_8113	FBXO2	ENSG00000116661.9	chr1 | -	IR	11709584:11709931-11709931:11710022-11710022:11710131	11709584:11710131	0.281	0.1074	1	0.445
BLCA	TCGA-4Z-AA80-01A-11R-A39I-07.b76b37cf-c9af-419d-a7c4-f97747de2946.aligned		intron_retention_8113	FBXO2	ENSG00000116661.9	chr1 | -	IR	11709584:11709931-11709931:11710022-11710022:11710131	11709584:11710131	0.281	0.1074	1	0.445
BLCA	TCGA-4Z-AA81-01A-11R-A39I-07.db105bbd-3501-4916-b032-dd3480038d55.aligned		intron_retention_8113	FBXO2	ENSG00000116661.9	chr1 | -	IR	11709584:11709931-11709931:11710022-11710022:11710131	11709584:11710131	0.281	0.1074	1	0.445
BLCA	TCGA-4Z-AA82-01A-11R-A39I-07.349245b6-2265-476a-845a-a7f44896cf52.aligned		intron_retention_8113	FBXO2	ENSG00000116661.9	chr1 | -	IR	11709584:11709931-11709931:11710022-11710022:11710131	11709584:11710131	0.281	0.1074	1	0.445
BLCA	TCGA-4Z-AA83-01A-11R-A39I-07.ede7cca5-c3f8-43e0-9354-b99821de60c0.aligned		intron_retention_8113	FBXO2	ENSG00000116661.9	chr1 | -	IR	11709584:11709931-11709931:11710022-11710022:11710131	11709584:11710131	0.281	0.1074	1	0.445
BLCA	TCGA-4Z-AA84-01A-11R-A39I-07.210311b9-88d7-4e29-974a-0e807ea88d1b.aligned		intron_retention_8113	FBXO2	ENSG00000116661.9	chr1 | -	IR	11709584:11709931-11709931:11710022-11710022:11710131	11709584:11710131	0.281	0.1074	1	0.445
BLCA	TCGA-4Z-AA86-01A-11R-A39I-07.7bd745b4-8009-4841-b775-1d8c4942591c.aligned		intron_retention_8113	FBXO2	ENSG00000116661.9	chr1 | -	IR	11709584:11709931-11709931:11710022-11710022:11710131	11709584:11710131	0.281	0.1074	1	0.445
BLCA	TCGA-4Z-AA87-01A-11R-A39I-07.3ae4a552-7df5-4a6b-a9c6-069cc96e7448.aligned		intron_retention_8113	FBXO2	ENSG00000116661.9	chr1 | -	IR	11709584:11709931-11709931:11710022-11710022:11710131	11709584:11710131	0.281	0.1074	1	0.445
BLCA	TCGA-4Z-AA89-01A-11R-A39I-07.88cb8b2c-9d76-4b91-bbca-5e62e251e3d6.aligned		intron_retention_8113	FBXO2	ENSG00000116661.9	chr1 | -	IR	11709584:11709931-11709931:11710022-11710022:11710131	11709584:11710131	0.281	0.1074	1	0.445
BLCA	TCGA-5N-A9KI-01A-31R-A42T-07.8b3cfbe2-bb77-4fe0-af7c-569f83701beb.aligned		intron_retention_8113	FBXO2	ENSG00000116661.9	chr1 | -	IR	11709584:11709931-11709931:11710022-11710022:11710131	11709584:11710131	0.281	0.1074	1	0.445
BLCA	TCGA-5N-A9KM-01A-11R-A42T-07.d3011182-eb79-48a8-8698-f9cf8f091924.aligned	1	intron_retention_8113	FBXO2	ENSG00000116661.9	chr1 | -	IR	11709584:11709931-11709931:11710022-11710022:11710131	11709584:11710131	0.281	0.1074	1	0.445
BLCA	TCGA-BL-A0C8-01A-11R-A10U-07.12c0b9eb-97fc-4fa1-8f64-49c0e3e171a2.aligned		intron_retention_8113	FBXO2	ENSG00000116661.9	chr1 | -	IR	11709584:11709931-11709931:11710022-11710022:11710131	11709584:11710131	0.281	0.1074	1	0.445
BLCA	TCGA-BL-A0C8-01A-11R-A277-07.45e06598-828f-4d6f-92ed-5f05fb72f8d7.aligned		intron_retention_8113	FBXO2	ENSG00000116661.9	chr1 | -	IR	11709584:11709931-11709931:11710022-11710022:11710131	11709584:11710131	0.281	0.1074	1	0.445
BLCA	TCGA-BL-A13I-01A-11R-A13Y-07.c270c34c-0cfd-410e-ab3c-231033196d25.aligned		intron_retention_8113	FBXO2	ENSG00000116661.9	chr1 | -	IR	11709584:11709931-11709931:11710022-11710022:11710131	11709584:11710131	0.281	0.1074	1	0.445
BLCA	TCGA-BL-A13I-01B-04R-A277-07.d42e2e38-07f6-474e-8ced-ad87b671db7c.aligned		intron_retention_8113	FBXO2	ENSG00000116661.9	chr1 | -	IR	11709584:11709931-11709931:11710022-11710022:11710131	11709584:11710131	0.281	0.1074	1	0.445
BLCA	TCGA-BL-A13J-01A-11R-A10U-07.3c499f07-67e2-4032-a0b5-b9edd90035f7.aligned		intron_retention_8113	FBXO2	ENSG00000116661.9	chr1 | -	IR	11709584:11709931-11709931:11710022-11710022:11710131	11709584:11710131	0.281	0.1074	1	0.445
BLCA	TCGA-BL-A13J-01A-11R-A277-07.06d706f6-4e05-4ffc-9b75-f9fccb639a33.aligned		intron_retention_8113	FBXO2	ENSG00000116661.9	chr1 | -	IR	11709584:11709931-11709931:11710022-11710022:11710131	11709584:11710131	0.281	0.1074	1	0.445
BLCA	TCGA-BL-A13J-11A-13R-A10U-07.c808f209-8527-4105-819b-610508d9d3b3.aligned		intron_retention_8113	FBXO2	ENSG00000116661.9	chr1 | -	IR	11709584:11709931-11709931:11710022-11710022:11710131	11709584:11710131	0.281	0.1074	1	0.445
BLCA	TCGA-BL-A3JM-01A-12R-A21D-07.9a7e2ecf-3470-427e-93cd-8461a3a3a5b8.aligned		intron_retention_8113	FBXO2	ENSG00000116661.9	chr1 | -	IR	11709584:11709931-11709931:11710022-11710022:11710131	11709584:11710131	0.281	0.1074	1	0.445
BLCA	TCGA-BL-A5ZZ-01A-31R-A30C-07.ac9729e9-6565-4e11-8828-ff43b752a5b6.aligned	1	intron_retention_8113	FBXO2	ENSG00000116661.9	chr1 | -	IR	11709584:11709931-11709931:11710022-11710022:11710131	11709584:11710131	0.281	0.1074	1	0.445
BLCA	TCGA-BT-A0S7-01A-11R-A10U-07.2bdc311e-59cc-449f-b8dc-6662052678fd.aligned	1	intron_retention_8113	FBXO2	ENSG00000116661.9	chr1 | -	IR	11709584:11709931-11709931:11710022-11710022:11710131	11709584:11710131	0.281	0.1074	1	0.445
BLCA	TCGA-BT-A0YX-01A-11R-A10U-07.2f3c17f6-be91-4195-9aa7-e02298d118f3.aligned		intron_retention_8113	FBXO2	ENSG00000116661.9	chr1 | -	IR	11709584:11709931-11709931:11710022-11710022:11710131	11709584:11710131	0.281	0.1074	1	0.445
BLCA	TCGA-BT-A20J-01A-11R-A14Y-07.09898301-3dac-4b86-af1b-6cbad9f2d380.aligned		intron_retention_8113	FBXO2	ENSG00000116661.9	chr1 | -	IR	11709584:11709931-11709931:11710022-11710022:11710131	11709584:11710131	0.281	0.1074	1	0.445
BLCA	TCGA-BT-A20N-01A-11R-A14Y-07.dfc4aacd-32b1-4cf8-91f9-3c865cf56ec9.aligned		intron_retention_8113	FBXO2	ENSG00000116661.9	chr1 | -	IR	11709584:11709931-11709931:11710022-11710022:11710131	11709584:11710131	0.281	0.1074	1	0.445
BLCA	TCGA-BT-A20N-11A-11R-A14Y-07.5231c5c8-f25b-4d0d-b7e3-14df112ccd7c.aligned		intron_retention_8113	FBXO2	ENSG00000116661.9	chr1 | -	IR	11709584:11709931-11709931:11710022-11710022:11710131	11709584:11710131	0.281	0.1074	1	0.445
BLCA	TCGA-BT-A20O-01A-21R-A14Y-07.cfb10485-b097-4470-bd7e-5ed2abd2e8ac.aligned		intron_retention_8113	FBXO2	ENSG00000116661.9	chr1 | -	IR	11709584:11709931-11709931:11710022-11710022:11710131	11709584:11710131	0.281	0.1074	1	0.445
BLCA	TCGA-BT-A20Q-01A-11R-A14Y-07.ca10d08d-3cc5-4171-9a70-66fdff3c0c3d.aligned		intron_retention_8113	FBXO2	ENSG00000116661.9	chr1 | -	IR	11709584:11709931-11709931:11710022-11710022:11710131	11709584:11710131	0.281	0.1074	1	0.445
BLCA	TCGA-BT-A20Q-11A-11R-A14Y-07.da9b7c51-c544-4ead-93c9-39b334b6bef2.aligned		intron_retention_8113	FBXO2	ENSG00000116661.9	chr1 | -	IR	11709584:11709931-11709931:11710022-11710022:11710131	11709584:11710131	0.281	0.1074	1	0.445
BLCA	TCGA-BT-A20R-01A-12R-A16R-07.d785b32a-686a-43d6-9e0b-0b63cfd63772.aligned		intron_retention_8113	FBXO2	ENSG00000116661.9	chr1 | -	IR	11709584:11709931-11709931:11710022-11710022:11710131	11709584:11710131	0.281	0.1074	1	0.445
BLCA	TCGA-BT-A20R-11A-11R-A16R-07.9846d55d-971d-4e69-b6ea-ce8c48cafede.aligned		intron_retention_8113	FBXO2	ENSG00000116661.9	chr1 | -	IR	11709584:11709931-11709931:11710022-11710022:11710131	11709584:11710131	0.281	0.1074	1	0.445
BLCA	TCGA-BT-A20T-01A-11R-A14Y-07.22e154de-0e3b-443b-8420-48d68d6c1ce4.aligned		intron_retention_8113	FBXO2	ENSG00000116661.9	chr1 | -	IR	11709584:11709931-11709931:11710022-11710022:11710131	11709584:11710131	0.281	0.1074	1	0.445
BLCA	TCGA-BT-A20U-01A-11R-A14Y-07.36a95ee7-1822-4d07-8110-843792006625.aligned		intron_retention_8113	FBXO2	ENSG00000116661.9	chr1 | -	IR	11709584:11709931-11709931:11710022-11710022:11710131	11709584:11710131	0.281	0.1074	1	0.445
BLCA	TCGA-BT-A20U-11A-11R-A14Y-07.20f18a89-bca9-4f97-98c5-7b58a4444823.aligned		intron_retention_8113	FBXO2	ENSG00000116661.9	chr1 | -	IR	11709584:11709931-11709931:11710022-11710022:11710131	11709584:11710131	0.281	0.1074	1	0.445
BLCA	TCGA-BT-A20V-01A-11R-A14Y-07.80cdd385-2a6a-4d59-81c7-f36786637323.aligned		intron_retention_8113	FBXO2	ENSG00000116661.9	chr1 | -	IR	11709584:11709931-11709931:11710022-11710022:11710131	11709584:11710131	0.281	0.1074	1	0.445
BLCA	TCGA-BT-A20W-01A-21R-A14Y-07.3cefcb0b-796f-4ef0-b50d-a6ed17e9be4d.aligned		intron_retention_8113	FBXO2	ENSG00000116661.9	chr1 | -	IR	11709584:11709931-11709931:11710022-11710022:11710131	11709584:11710131	0.281	0.1074	1	0.445
BLCA	TCGA-BT-A20W-11A-11R-A14Y-07.d4a3d2d7-35c6-40b5-9e67-093f4f5834a4.aligned		intron_retention_8113	FBXO2	ENSG00000116661.9	chr1 | -	IR	11709584:11709931-11709931:11710022-11710022:11710131	11709584:11710131	0.281	0.1074	1	0.445
BLCA	TCGA-BT-A20X-01A-11R-A16R-07.b3797921-4b9a-43c4-8904-6fb80fc80c08.aligned	0.787	intron_retention_8113	FBXO2	ENSG00000116661.9	chr1 | -	IR	11709584:11709931-11709931:11710022-11710022:11710131	11709584:11710131	0.281	0.1074	1	0.445
BLCA	TCGA-BT-A2LA-01A-11R-A18C-07.312ea080-3831-453d-aa8c-e466192c8309.aligned	1	intron_retention_8113	FBXO2	ENSG00000116661.9	chr1 | -	IR	11709584:11709931-11709931:11710022-11710022:11710131	11709584:11710131	0.281	0.1074	1	0.445
BLCA	TCGA-BT-A2LA-11A-11R-A18C-07.e92d3c82-1aea-48da-97fd-bf6325d5c51b.aligned		intron_retention_8113	FBXO2	ENSG00000116661.9	chr1 | -	IR	11709584:11709931-11709931:11710022-11710022:11710131	11709584:11710131	0.281	0.1074	1	0.445
BLCA	TCGA-BT-A2LB-01A-11R-A18C-07.b6a8b608-8bf6-4d57-a720-bd4aaced4591.aligned		intron_retention_8113	FBXO2	ENSG00000116661.9	chr1 | -	IR	11709584:11709931-11709931:11710022-11710022:11710131	11709584:11710131	0.281	0.1074	1	0.445
BLCA	TCGA-BT-A2LB-11A-11R-A18C-07.dc6e5a42-6613-41cb-af1e-7d7fa1904b62.aligned		intron_retention_8113	FBXO2	ENSG00000116661.9	chr1 | -	IR	11709584:11709931-11709931:11710022-11710022:11710131	11709584:11710131	0.281	0.1074	1	0.445
BLCA	TCGA-BT-A2LD-01A-12R-A20F-07.6f3cb879-cf6d-4347-8aae-b6a6ee7a4274.aligned	1	intron_retention_8113	FBXO2	ENSG00000116661.9	chr1 | -	IR	11709584:11709931-11709931:11710022-11710022:11710131	11709584:11710131	0.281	0.1074	1	0.445
BLCA	TCGA-BT-A3PH-01A-11R-A220-07.B290727B-23ED-4E73-9071-CF2C06671430.aligned		intron_retention_8113	FBXO2	ENSG00000116661.9	chr1 | -	IR	11709584:11709931-11709931:11710022-11710022:11710131	11709584:11710131	0.281	0.1074	1	0.445
BLCA	TCGA-BT-A3PJ-01A-21R-A220-07.5968C8D3-5F1A-4EB8-8D9B-8BD3FD3FD9F1.aligned		intron_retention_8113	FBXO2	ENSG00000116661.9	chr1 | -	IR	11709584:11709931-11709931:11710022-11710022:11710131	11709584:11710131	0.281	0.1074	1	0.445
BLCA	TCGA-BT-A3PK-01A-21R-A220-07.20CA7C4D-7EF0-4FC5-907B-A90FEC12A561.aligned		intron_retention_8113	FBXO2	ENSG00000116661.9	chr1 | -	IR	11709584:11709931-11709931:11710022-11710022:11710131	11709584:11710131	0.281	0.1074	1	0.445
BLCA	TCGA-BT-A42C-01A-11R-A23N-07.f6b30464-1e34-4b52-baff-544f5fc8f52f.aligned		intron_retention_8113	FBXO2	ENSG00000116661.9	chr1 | -	IR	11709584:11709931-11709931:11710022-11710022:11710131	11709584:11710131	0.281	0.1074	1	0.445
BLCA	TCGA-BT-A42E-01A-11R-A23W-07.f89742f4-3575-4dd4-860f-ea9ab0321a48.aligned	1	intron_retention_8113	FBXO2	ENSG00000116661.9	chr1 | -	IR	11709584:11709931-11709931:11710022-11710022:11710131	11709584:11710131	0.281	0.1074	1	0.445
BLCA	TCGA-BT-A42F-01A-11R-A23W-07.36f98bd7-f044-4497-9d19-e25c8e847def.aligned		intron_retention_8113	FBXO2	ENSG00000116661.9	chr1 | -	IR	11709584:11709931-11709931:11710022-11710022:11710131	11709584:11710131	0.281	0.1074	1	0.445
BLCA	TCGA-C4-A0EZ-01A-21R-A24X-07.8f482c29-37fe-400f-b178-224765a0c037.aligned		intron_retention_8113	FBXO2	ENSG00000116661.9	chr1 | -	IR	11709584:11709931-11709931:11710022-11710022:11710131	11709584:11710131	0.281	0.1074	1	0.445
BLCA	TCGA-C4-A0F0-01A-12R-A10U-07.958520af-f270-49ab-8fb6-57e1ae8ae68f.aligned		intron_retention_8113	FBXO2	ENSG00000116661.9	chr1 | -	IR	11709584:11709931-11709931:11710022-11710022:11710131	11709584:11710131	0.281	0.1074	1	0.445
BLCA	TCGA-C4-A0F1-01A-11R-A034-07.791dd985-420e-46a0-a770-ebaf0d2beaf1.aligned	1	intron_retention_8113	FBXO2	ENSG00000116661.9	chr1 | -	IR	11709584:11709931-11709931:11710022-11710022:11710131	11709584:11710131	0.281	0.1074	1	0.445
BLCA	TCGA-C4-A0F6-01A-11R-A10U-07.b1984010-7ef5-4df4-abfc-d18502cf124c.aligned		intron_retention_8113	FBXO2	ENSG00000116661.9	chr1 | -	IR	11709584:11709931-11709931:11710022-11710022:11710131	11709584:11710131	0.281	0.1074	1	0.445
BLCA	TCGA-C4-A0F7-01A-11R-A084-07.c0ccb685-0789-4559-9189-05b841173aff.aligned		intron_retention_8113	FBXO2	ENSG00000116661.9	chr1 | -	IR	11709584:11709931-11709931:11710022-11710022:11710131	11709584:11710131	0.281	0.1074	1	0.445
BLCA	TCGA-CF-A1HR-01A-11R-A13Y-07.c11e3246-c33d-47ef-b4b4-be287b92d91e.aligned		intron_retention_8113	FBXO2	ENSG00000116661.9	chr1 | -	IR	11709584:11709931-11709931:11710022-11710022:11710131	11709584:11710131	0.281	0.1074	1	0.445
BLCA	TCGA-CF-A1HS-01A-11R-A13Y-07.7206d218-0e58-4722-8566-cbcbd8b8b4e0.aligned		intron_retention_8113	FBXO2	ENSG00000116661.9	chr1 | -	IR	11709584:11709931-11709931:11710022-11710022:11710131	11709584:11710131	0.281	0.1074	1	0.445
BLCA	TCGA-CF-A27C-01A-11R-A16R-07.d6d7412b-5ec2-413e-a85d-7f765c67afa3.aligned		intron_retention_8113	FBXO2	ENSG00000116661.9	chr1 | -	IR	11709584:11709931-11709931:11710022-11710022:11710131	11709584:11710131	0.281	0.1074	1	0.445
BLCA	TCGA-CF-A3MG-01A-11R-A20F-07.772b8a77-bb90-40a8-ad48-f7a1fc1769de.aligned		intron_retention_8113	FBXO2	ENSG00000116661.9	chr1 | -	IR	11709584:11709931-11709931:11710022-11710022:11710131	11709584:11710131	0.281	0.1074	1	0.445
BLCA	TCGA-CF-A3MH-01A-11R-A20F-07.38e62ae5-729f-41fa-94e7-7e3caa0a246b.aligned		intron_retention_8113	FBXO2	ENSG00000116661.9	chr1 | -	IR	11709584:11709931-11709931:11710022-11710022:11710131	11709584:11710131	0.281	0.1074	1	0.445
BLCA	TCGA-CF-A47T-01A-11R-A23W-07.fc2ec949-9292-4709-b0ea-37368add311d.aligned		intron_retention_8113	FBXO2	ENSG00000116661.9	chr1 | -	IR	11709584:11709931-11709931:11710022-11710022:11710131	11709584:11710131	0.281	0.1074	1	0.445
BLCA	TCGA-CF-A47V-01A-11R-A23W-07.e43f2bcb-9ba5-4b65-9042-4d3b06224c0f.aligned	0.555	intron_retention_8113	FBXO2	ENSG00000116661.9	chr1 | -	IR	11709584:11709931-11709931:11710022-11710022:11710131	11709584:11710131	0.281	0.1074	1	0.445
BLCA	TCGA-CF-A47X-01A-31R-A23W-07.c27a2180-0dec-43ec-bf0f-2cb0acaea022.aligned		intron_retention_8113	FBXO2	ENSG00000116661.9	chr1 | -	IR	11709584:11709931-11709931:11710022-11710022:11710131	11709584:11710131	0.281	0.1074	1	0.445
BLCA	TCGA-CF-A47Y-01A-11R-A23W-07.0c1e7ecc-d20d-4047-8419-6347537cb8a3.aligned		intron_retention_8113	FBXO2	ENSG00000116661.9	chr1 | -	IR	11709584:11709931-11709931:11710022-11710022:11710131	11709584:11710131	0.281	0.1074	1	0.445
BLCA	TCGA-CF-A5U8-01A-11R-A28M-07.58e49daa-eced-4ca8-af92-98af61f8b6f1.aligned	1	intron_retention_8113	FBXO2	ENSG00000116661.9	chr1 | -	IR	11709584:11709931-11709931:11710022-11710022:11710131	11709584:11710131	0.281	0.1074	1	0.445
BLCA	TCGA-CF-A7I0-01A-22R-A352-07.2ee1e299-76a9-4d45-a79b-02c1f31f9399.aligned		intron_retention_8113	FBXO2	ENSG00000116661.9	chr1 | -	IR	11709584:11709931-11709931:11710022-11710022:11710131	11709584:11710131	0.281	0.1074	1	0.445
BLCA	TCGA-CF-A9FF-01A-11R-A38B-07.1a65f0c1-c6e4-470b-8be1-1744332a1470.aligned		intron_retention_8113	FBXO2	ENSG00000116661.9	chr1 | -	IR	11709584:11709931-11709931:11710022-11710022:11710131	11709584:11710131	0.281	0.1074	1	0.445
BLCA	TCGA-CF-A9FH-01A-11R-A38B-07.1e7def5c-75f1-471d-9fab-b7e350c794a8.aligned		intron_retention_8113	FBXO2	ENSG00000116661.9	chr1 | -	IR	11709584:11709931-11709931:11710022-11710022:11710131	11709584:11710131	0.281	0.1074	1	0.445
BLCA	TCGA-CF-A9FL-01A-11R-A38B-07.718250e5-65a4-4365-8e2e-3dd4966c4fc6.aligned		intron_retention_8113	FBXO2	ENSG00000116661.9	chr1 | -	IR	11709584:11709931-11709931:11710022-11710022:11710131	11709584:11710131	0.281	0.1074	1	0.445
BLCA	TCGA-CF-A9FM-01A-11R-A38B-07.5071fd5a-8c44-4dfb-bcca-31885b033372.aligned	1	intron_retention_8113	FBXO2	ENSG00000116661.9	chr1 | -	IR	11709584:11709931-11709931:11710022-11710022:11710131	11709584:11710131	0.281	0.1074	1	0.445
BLCA	TCGA-CU-A0YN-01A-21R-A10U-07.3d1b5ffe-38d6-4073-9020-c6897727341c.aligned		intron_retention_8113	FBXO2	ENSG00000116661.9	chr1 | -	IR	11709584:11709931-11709931:11710022-11710022:11710131	11709584:11710131	0.281	0.1074	1	0.445
BLCA	TCGA-CU-A0YN-11A-11R-A10U-07.61c103bc-8fe0-43d7-aa15-a6fe7f503112.aligned		intron_retention_8113	FBXO2	ENSG00000116661.9	chr1 | -	IR	11709584:11709931-11709931:11710022-11710022:11710131	11709584:11710131	0.281	0.1074	1	0.445
BLCA	TCGA-CU-A0YO-01A-11R-A10U-07.2fdb2cad-53e5-44e4-8b80-ee5801964b20.aligned		intron_retention_8113	FBXO2	ENSG00000116661.9	chr1 | -	IR	11709584:11709931-11709931:11710022-11710022:11710131	11709584:11710131	0.281	0.1074	1	0.445
BLCA	TCGA-CU-A0YR-01A-12R-A10U-07.cec64615-07c6-4e49-8e59-afb97d37464f.aligned		intron_retention_8113	FBXO2	ENSG00000116661.9	chr1 | -	IR	11709584:11709931-11709931:11710022-11710022:11710131	11709584:11710131	0.281	0.1074	1	0.445
BLCA	TCGA-CU-A0YR-11A-13R-A10U-07.6d1b727a-12fb-4756-a076-6be61253f480.aligned		intron_retention_8113	FBXO2	ENSG00000116661.9	chr1 | -	IR	11709584:11709931-11709931:11710022-11710022:11710131	11709584:11710131	0.281	0.1074	1	0.445
BLCA	TCGA-CU-A3KJ-01A-11R-A21D-07.511d6289-1558-4e90-a77a-05298e15b17c.aligned	1	intron_retention_8113	FBXO2	ENSG00000116661.9	chr1 | -	IR	11709584:11709931-11709931:11710022-11710022:11710131	11709584:11710131	0.281	0.1074	1	0.445
BLCA	TCGA-CU-A3QU-01A-11R-A22U-07.C40FF5CD-BFFA-40C4-A192-9830B0DA3DAA.aligned		intron_retention_8113	FBXO2	ENSG00000116661.9	chr1 | -	IR	11709584:11709931-11709931:11710022-11710022:11710131	11709584:11710131	0.281	0.1074	1	0.445
BLCA	TCGA-CU-A3YL-01A-11R-A22U-07.68B08EAD-5E38-490F-8654-B3DB19C80FCA.aligned		intron_retention_8113	FBXO2	ENSG00000116661.9	chr1 | -	IR	11709584:11709931-11709931:11710022-11710022:11710131	11709584:11710131	0.281	0.1074	1	0.445
BLCA	TCGA-CU-A5W6-01A-11R-A28M-07.168e440a-b356-45c7-849c-43823703417e.aligned	1	intron_retention_8113	FBXO2	ENSG00000116661.9	chr1 | -	IR	11709584:11709931-11709931:11710022-11710022:11710131	11709584:11710131	0.281	0.1074	1	0.445
BLCA	TCGA-CU-A72E-01A-12R-A33J-07.69b30673-9ec0-4c05-b75c-12bcb1f7268f.aligned	1	intron_retention_8113	FBXO2	ENSG00000116661.9	chr1 | -	IR	11709584:11709931-11709931:11710022-11710022:11710131	11709584:11710131	0.281	0.1074	1	0.445
BLCA	TCGA-DK-A1A3-01A-11R-A13Y-07.d22b6ef3-9b08-44d9-b37f-e7f61ce89404.aligned		intron_retention_8113	FBXO2	ENSG00000116661.9	chr1 | -	IR	11709584:11709931-11709931:11710022-11710022:11710131	11709584:11710131	0.281	0.1074	1	0.445
BLCA	TCGA-DK-A1A5-01A-11R-A13Y-07.5e7e3e20-cbfa-476d-bb92-fa3a58207a9b.aligned		intron_retention_8113	FBXO2	ENSG00000116661.9	chr1 | -	IR	11709584:11709931-11709931:11710022-11710022:11710131	11709584:11710131	0.281	0.1074	1	0.445
BLCA	TCGA-DK-A1A6-01A-11R-A13Y-07.381b51af-d1f7-41db-a69e-49d681b3ef39.aligned		intron_retention_8113	FBXO2	ENSG00000116661.9	chr1 | -	IR	11709584:11709931-11709931:11710022-11710022:11710131	11709584:11710131	0.281	0.1074	1	0.445
BLCA	TCGA-DK-A1A7-01A-11R-A13Y-07.94447759-c20c-49f5-b51f-cbfdea41f2e8.aligned	1	intron_retention_8113	FBXO2	ENSG00000116661.9	chr1 | -	IR	11709584:11709931-11709931:11710022-11710022:11710131	11709584:11710131	0.281	0.1074	1	0.445
BLCA	TCGA-DK-A1AA-01A-11R-A13Y-07.5b0896f2-8fd9-42ee-b56d-b140f8d8657e.aligned	1	intron_retention_8113	FBXO2	ENSG00000116661.9	chr1 | -	IR	11709584:11709931-11709931:11710022-11710022:11710131	11709584:11710131	0.281	0.1074	1	0.445
BLCA	TCGA-DK-A1AB-01A-11R-A13Y-07.fd79008e-fae5-4276-bc25-eae14eb7b7e4.aligned		intron_retention_8113	FBXO2	ENSG00000116661.9	chr1 | -	IR	11709584:11709931-11709931:11710022-11710022:11710131	11709584:11710131	0.281	0.1074	1	0.445
BLCA	TCGA-DK-A1AC-01A-11R-A13Y-07.037904cf-92c3-443c-8800-0156db1e3a89.aligned		intron_retention_8113	FBXO2	ENSG00000116661.9	chr1 | -	IR	11709584:11709931-11709931:11710022-11710022:11710131	11709584:11710131	0.281	0.1074	1	0.445
BLCA	TCGA-DK-A1AD-01A-11R-A13Y-07.6491f391-9704-4249-bc81-d712e755ec74.aligned		intron_retention_8113	FBXO2	ENSG00000116661.9	chr1 | -	IR	11709584:11709931-11709931:11710022-11710022:11710131	11709584:11710131	0.281	0.1074	1	0.445
BLCA	TCGA-DK-A1AE-01A-11R-A13Y-07.b9f76fc8-ca33-46c5-89a0-ae16d42f987f.aligned		intron_retention_8113	FBXO2	ENSG00000116661.9	chr1 | -	IR	11709584:11709931-11709931:11710022-11710022:11710131	11709584:11710131	0.281	0.1074	1	0.445
BLCA	TCGA-DK-A1AF-01A-11R-A13Y-07.3add40ce-6d64-4ded-9ab6-2f076c420dc4.aligned		intron_retention_8113	FBXO2	ENSG00000116661.9	chr1 | -	IR	11709584:11709931-11709931:11710022-11710022:11710131	11709584:11710131	0.281	0.1074	1	0.445
BLCA	TCGA-DK-A1AG-01A-11R-A13Y-07.b5036d12-d9cc-46a4-b60a-49740310380c.aligned	1	intron_retention_8113	FBXO2	ENSG00000116661.9	chr1 | -	IR	11709584:11709931-11709931:11710022-11710022:11710131	11709584:11710131	0.281	0.1074	1	0.445
BLCA	TCGA-DK-A2HX-01A-12R-A18C-07.518085b3-f993-4346-bb4d-b7244e9435d6.aligned	1	intron_retention_8113	FBXO2	ENSG00000116661.9	chr1 | -	IR	11709584:11709931-11709931:11710022-11710022:11710131	11709584:11710131	0.281	0.1074	1	0.445
BLCA	TCGA-DK-A2I1-01A-11R-A180-07.6c390573-7472-441d-956b-9f4747a18f2b.aligned		intron_retention_8113	FBXO2	ENSG00000116661.9	chr1 | -	IR	11709584:11709931-11709931:11710022-11710022:11710131	11709584:11710131	0.281	0.1074	1	0.445
BLCA	TCGA-DK-A2I2-01A-11R-A180-07.325c6503-12a1-4985-99a0-b968850f9d92.aligned	1	intron_retention_8113	FBXO2	ENSG00000116661.9	chr1 | -	IR	11709584:11709931-11709931:11710022-11710022:11710131	11709584:11710131	0.281	0.1074	1	0.445
BLCA	TCGA-DK-A2I4-01A-11R-A21D-07.4c4fbc19-727b-48b0-82e0-42ca8309f315.aligned	1	intron_retention_8113	FBXO2	ENSG00000116661.9	chr1 | -	IR	11709584:11709931-11709931:11710022-11710022:11710131	11709584:11710131	0.281	0.1074	1	0.445
BLCA	TCGA-DK-A2I6-01A-12R-A18C-07.ad775597-406f-4470-894a-e37d0666761b.aligned	1	intron_retention_8113	FBXO2	ENSG00000116661.9	chr1 | -	IR	11709584:11709931-11709931:11710022-11710022:11710131	11709584:11710131	0.281	0.1074	1	0.445
BLCA	TCGA-DK-A3IK-01A-32R-A21D-07.42db28fc-4d5f-4b0f-aa86-7d27197c7649.aligned		intron_retention_8113	FBXO2	ENSG00000116661.9	chr1 | -	IR	11709584:11709931-11709931:11710022-11710022:11710131	11709584:11710131	0.281	0.1074	1	0.445
BLCA	TCGA-DK-A3IL-01A-11R-A20F-07.f154cc00-e118-4d4c-b9d2-2f1f71e0a964.aligned		intron_retention_8113	FBXO2	ENSG00000116661.9	chr1 | -	IR	11709584:11709931-11709931:11710022-11710022:11710131	11709584:11710131	0.281	0.1074	1	0.445
BLCA	TCGA-DK-A3IM-01A-11R-A20F-07.a09bfd63-c31c-461a-b5a4-60670f421233.aligned	1	intron_retention_8113	FBXO2	ENSG00000116661.9	chr1 | -	IR	11709584:11709931-11709931:11710022-11710022:11710131	11709584:11710131	0.281	0.1074	1	0.445
BLCA	TCGA-DK-A3IN-01A-11R-A20F-07.58382a39-eb95-4cd0-ad04-48c6da4b4a56.aligned		intron_retention_8113	FBXO2	ENSG00000116661.9	chr1 | -	IR	11709584:11709931-11709931:11710022-11710022:11710131	11709584:11710131	0.281	0.1074	1	0.445
BLCA	TCGA-DK-A3IQ-01A-31R-A32Y-07.b68f9935-3265-4930-a221-61bc9f8e2eda.aligned		intron_retention_8113	FBXO2	ENSG00000116661.9	chr1 | -	IR	11709584:11709931-11709931:11710022-11710022:11710131	11709584:11710131	0.281	0.1074	1	0.445
BLCA	TCGA-DK-A3IS-01A-21R-A21D-07.fd93cd6f-ab1c-460c-bfca-268c485a4f5b.aligned		intron_retention_8113	FBXO2	ENSG00000116661.9	chr1 | -	IR	11709584:11709931-11709931:11710022-11710022:11710131	11709584:11710131	0.281	0.1074	1	0.445
BLCA	TCGA-DK-A3IT-01A-31R-A20F-07.e33ab42a-bfb3-4923-a305-a6babcee61f4.aligned		intron_retention_8113	FBXO2	ENSG00000116661.9	chr1 | -	IR	11709584:11709931-11709931:11710022-11710022:11710131	11709584:11710131	0.281	0.1074	1	0.445
BLCA	TCGA-DK-A3IU-01A-11R-A20F-07.c07c2f21-21d4-49cb-93bb-8d128966fcd6.aligned	1	intron_retention_8113	FBXO2	ENSG00000116661.9	chr1 | -	IR	11709584:11709931-11709931:11710022-11710022:11710131	11709584:11710131	0.281	0.1074	1	0.445
BLCA	TCGA-DK-A3IV-01A-22R-A21D-07.70c7f658-5208-4b3f-9767-27a3b06b8ddc.aligned		intron_retention_8113	FBXO2	ENSG00000116661.9	chr1 | -	IR	11709584:11709931-11709931:11710022-11710022:11710131	11709584:11710131	0.281	0.1074	1	0.445
BLCA	TCGA-DK-A3WW-01A-22R-A23N-07.edde0611-3cdb-4f1c-a259-68cb4a905bea.aligned	1	intron_retention_8113	FBXO2	ENSG00000116661.9	chr1 | -	IR	11709584:11709931-11709931:11710022-11710022:11710131	11709584:11710131	0.281	0.1074	1	0.445
BLCA	TCGA-DK-A3WX-01A-22R-A22U-07.024BC00E-0419-4DC6-8DF4-AD3AF476314D.aligned	1	intron_retention_8113	FBXO2	ENSG00000116661.9	chr1 | -	IR	11709584:11709931-11709931:11710022-11710022:11710131	11709584:11710131	0.281	0.1074	1	0.445
BLCA	TCGA-DK-A3WY-01A-11R-A22U-07.169E537F-9FFC-4D56-9E77-1F38951EE3D3.aligned		intron_retention_8113	FBXO2	ENSG00000116661.9	chr1 | -	IR	11709584:11709931-11709931:11710022-11710022:11710131	11709584:11710131	0.281	0.1074	1	0.445
BLCA	TCGA-DK-A3X1-01A-12R-A22U-07.D74030BF-DFA1-4F65-9596-FD505733139E.aligned		intron_retention_8113	FBXO2	ENSG00000116661.9	chr1 | -	IR	11709584:11709931-11709931:11710022-11710022:11710131	11709584:11710131	0.281	0.1074	1	0.445
BLCA	TCGA-DK-A3X2-01A-11R-A22U-07.C4FBD136-4227-4792-AC53-8C887AA6AB1A.aligned		intron_retention_8113	FBXO2	ENSG00000116661.9	chr1 | -	IR	11709584:11709931-11709931:11710022-11710022:11710131	11709584:11710131	0.281	0.1074	1	0.445
BLCA	TCGA-DK-A6AV-01A-12R-A30C-07.01a7643f-d7be-40e8-bdc1-562d825e8ba8.aligned		intron_retention_8113	FBXO2	ENSG00000116661.9	chr1 | -	IR	11709584:11709931-11709931:11710022-11710022:11710131	11709584:11710131	0.281	0.1074	1	0.445
BLCA	TCGA-DK-A6AW-01A-11R-A30C-07.d1b0c4db-59b7-47ac-b26f-fb14c5aac200.aligned	1	intron_retention_8113	FBXO2	ENSG00000116661.9	chr1 | -	IR	11709584:11709931-11709931:11710022-11710022:11710131	11709584:11710131	0.281	0.1074	1	0.445
BLCA	TCGA-DK-A6B0-01A-11R-A31N-07.b6ebbe90-feb4-4e8e-9408-031db2297c1c.aligned	1	intron_retention_8113	FBXO2	ENSG00000116661.9	chr1 | -	IR	11709584:11709931-11709931:11710022-11710022:11710131	11709584:11710131	0.281	0.1074	1	0.445
BLCA	TCGA-DK-A6B1-01A-12R-A30C-07.a66ddf41-6af9-47c0-952b-688aac83c8c8.aligned		intron_retention_8113	FBXO2	ENSG00000116661.9	chr1 | -	IR	11709584:11709931-11709931:11710022-11710022:11710131	11709584:11710131	0.281	0.1074	1	0.445
BLCA	TCGA-DK-A6B2-01A-11R-A30C-07.f1e23b9a-a79f-439c-a4b9-58fbe9899e98.aligned		intron_retention_8113	FBXO2	ENSG00000116661.9	chr1 | -	IR	11709584:11709931-11709931:11710022-11710022:11710131	11709584:11710131	0.281	0.1074	1	0.445
BLCA	TCGA-DK-A6B5-01A-11R-A31N-07.92e94724-a03e-4b58-91b2-f309ab8dc943.aligned	0.968	intron_retention_8113	FBXO2	ENSG00000116661.9	chr1 | -	IR	11709584:11709931-11709931:11710022-11710022:11710131	11709584:11710131	0.281	0.1074	1	0.445
BLCA	TCGA-DK-A6B6-01A-11R-A30C-07.fa1f8758-485c-4148-87b7-af891f652f48.aligned		intron_retention_8113	FBXO2	ENSG00000116661.9	chr1 | -	IR	11709584:11709931-11709931:11710022-11710022:11710131	11709584:11710131	0.281	0.1074	1	0.445
BLCA	TCGA-DK-AA6L-01A-11R-A39I-07.ccc6510d-4ef3-4471-8fd1-e240fe55d95c.aligned		intron_retention_8113	FBXO2	ENSG00000116661.9	chr1 | -	IR	11709584:11709931-11709931:11710022-11710022:11710131	11709584:11710131	0.281	0.1074	1	0.445
BLCA	TCGA-DK-AA6M-01A-11R-A39I-07.230c9517-0296-4966-8dd7-14c062e82224.aligned	1	intron_retention_8113	FBXO2	ENSG00000116661.9	chr1 | -	IR	11709584:11709931-11709931:11710022-11710022:11710131	11709584:11710131	0.281	0.1074	1	0.445
BLCA	TCGA-DK-AA6P-01A-11R-A39I-07.c048b775-7679-424f-a008-8f7def9c0523.aligned		intron_retention_8113	FBXO2	ENSG00000116661.9	chr1 | -	IR	11709584:11709931-11709931:11710022-11710022:11710131	11709584:11710131	0.281	0.1074	1	0.445
BLCA	TCGA-DK-AA6Q-01A-11R-A39I-07.52e425cf-1fad-400e-bc39-6df2a3310a68.aligned		intron_retention_8113	FBXO2	ENSG00000116661.9	chr1 | -	IR	11709584:11709931-11709931:11710022-11710022:11710131	11709584:11710131	0.281	0.1074	1	0.445
BLCA	TCGA-DK-AA6R-01A-11R-A42T-07.0ccf81b2-c760-4a37-acf1-c692868167b1.aligned		intron_retention_8113	FBXO2	ENSG00000116661.9	chr1 | -	IR	11709584:11709931-11709931:11710022-11710022:11710131	11709584:11710131	0.281	0.1074	1	0.445
BLCA	TCGA-DK-AA6S-01A-21R-A39I-07.f4159732-6dd2-4614-b3e2-3a528fdfa527.aligned	1	intron_retention_8113	FBXO2	ENSG00000116661.9	chr1 | -	IR	11709584:11709931-11709931:11710022-11710022:11710131	11709584:11710131	0.281	0.1074	1	0.445
BLCA	TCGA-DK-AA6T-01A-11R-A39I-07.a9eb4088-1eb0-47ac-867b-df97fbeb318c.aligned		intron_retention_8113	FBXO2	ENSG00000116661.9	chr1 | -	IR	11709584:11709931-11709931:11710022-11710022:11710131	11709584:11710131	0.281	0.1074	1	0.445
BLCA	TCGA-DK-AA6U-01A-11R-A39I-07.81741a67-7bfd-46c5-8784-a4c87eb71c5e.aligned		intron_retention_8113	FBXO2	ENSG00000116661.9	chr1 | -	IR	11709584:11709931-11709931:11710022-11710022:11710131	11709584:11710131	0.281	0.1074	1	0.445
BLCA	TCGA-DK-AA6W-01A-12R-A39I-07.4d4cc53b-06d2-4baa-bf1c-03f9509e422c.aligned	0.911	intron_retention_8113	FBXO2	ENSG00000116661.9	chr1 | -	IR	11709584:11709931-11709931:11710022-11710022:11710131	11709584:11710131	0.281	0.1074	1	0.445
BLCA	TCGA-DK-AA6X-01A-12R-A42T-07.254061df-9073-4d41-a519-e79cc2d5c562.aligned		intron_retention_8113	FBXO2	ENSG00000116661.9	chr1 | -	IR	11709584:11709931-11709931:11710022-11710022:11710131	11709584:11710131	0.281	0.1074	1	0.445
BLCA	TCGA-DK-AA71-01A-31R-A39I-07.eb3cfcc9-657c-4527-ac58-948307cae54c.aligned		intron_retention_8113	FBXO2	ENSG00000116661.9	chr1 | -	IR	11709584:11709931-11709931:11710022-11710022:11710131	11709584:11710131	0.281	0.1074	1	0.445
BLCA	TCGA-DK-AA75-01A-11R-A39I-07.8ac289ba-c81f-44ed-9fb4-8c2af9eccdb0.aligned		intron_retention_8113	FBXO2	ENSG00000116661.9	chr1 | -	IR	11709584:11709931-11709931:11710022-11710022:11710131	11709584:11710131	0.281	0.1074	1	0.445
BLCA	TCGA-DK-AA76-01A-11R-A39I-07.4ecec21e-cbd5-42ec-af2e-bf58f2710458.aligned		intron_retention_8113	FBXO2	ENSG00000116661.9	chr1 | -	IR	11709584:11709931-11709931:11710022-11710022:11710131	11709584:11710131	0.281	0.1074	1	0.445
BLCA	TCGA-DK-AA77-01A-11R-A39I-07.94b917da-6579-4d30-b81b-eba739bbae5c.aligned		intron_retention_8113	FBXO2	ENSG00000116661.9	chr1 | -	IR	11709584:11709931-11709931:11710022-11710022:11710131	11709584:11710131	0.281	0.1074	1	0.445
BLCA	TCGA-E5-A2PC-01A-11R-A206-07.c32574a0-5f85-4053-bb98-8472b496975e.aligned		intron_retention_8113	FBXO2	ENSG00000116661.9	chr1 | -	IR	11709584:11709931-11709931:11710022-11710022:11710131	11709584:11710131	0.281	0.1074	1	0.445
BLCA	TCGA-E5-A4TZ-01A-11R-A31N-07.b7290db7-112b-494e-80f7-bb05860f6c7e.aligned		intron_retention_8113	FBXO2	ENSG00000116661.9	chr1 | -	IR	11709584:11709931-11709931:11710022-11710022:11710131	11709584:11710131	0.281	0.1074	1	0.445
BLCA	TCGA-E7-A3X6-01A-12R-A22U-07.B4BB6509-7D67-4D5E-8FD1-624FA373DF4D.aligned	1	intron_retention_8113	FBXO2	ENSG00000116661.9	chr1 | -	IR	11709584:11709931-11709931:11710022-11710022:11710131	11709584:11710131	0.281	0.1074	1	0.445
BLCA	TCGA-E7-A3Y1-01A-11R-A22U-07.791A46E8-4D45-4878-B09D-A4F64CE88746.aligned		intron_retention_8113	FBXO2	ENSG00000116661.9	chr1 | -	IR	11709584:11709931-11709931:11710022-11710022:11710131	11709584:11710131	0.281	0.1074	1	0.445
BLCA	TCGA-E7-A4IJ-01A-31R-A26T-07.21c8f741-963f-463e-ac5b-1c2c1aa9d8cb.aligned		intron_retention_8113	FBXO2	ENSG00000116661.9	chr1 | -	IR	11709584:11709931-11709931:11710022-11710022:11710131	11709584:11710131	0.281	0.1074	1	0.445
BLCA	TCGA-E7-A541-01A-11R-A26T-07.dbffd0f0-d063-45a2-8cdb-e6ffa6c9e66d.aligned		intron_retention_8113	FBXO2	ENSG00000116661.9	chr1 | -	IR	11709584:11709931-11709931:11710022-11710022:11710131	11709584:11710131	0.281	0.1074	1	0.445
BLCA	TCGA-E7-A5KE-01A-11R-A28M-07.4be53c32-b222-44dd-b0b9-6a935591380a.aligned		intron_retention_8113	FBXO2	ENSG00000116661.9	chr1 | -	IR	11709584:11709931-11709931:11710022-11710022:11710131	11709584:11710131	0.281	0.1074	1	0.445
BLCA	TCGA-E7-A5KF-01A-11R-A28M-07.a5118740-bf71-47e8-a2e3-506792865c90.aligned		intron_retention_8113	FBXO2	ENSG00000116661.9	chr1 | -	IR	11709584:11709931-11709931:11710022-11710022:11710131	11709584:11710131	0.281	0.1074	1	0.445
BLCA	TCGA-E7-A677-01A-11R-A30C-07.0aba0f10-05b2-4045-822b-045f61457427.aligned		intron_retention_8113	FBXO2	ENSG00000116661.9	chr1 | -	IR	11709584:11709931-11709931:11710022-11710022:11710131	11709584:11710131	0.281	0.1074	1	0.445
BLCA	TCGA-E7-A678-01A-11R-A30C-07.4e0401b2-6ad4-4709-aa43-f2af0afef259.aligned	0.838	intron_retention_8113	FBXO2	ENSG00000116661.9	chr1 | -	IR	11709584:11709931-11709931:11710022-11710022:11710131	11709584:11710131	0.281	0.1074	1	0.445
BLCA	TCGA-E7-A6MD-01A-41R-A352-07.bf6f4d8e-7aa4-42ae-961d-4686984fc871.aligned	1	intron_retention_8113	FBXO2	ENSG00000116661.9	chr1 | -	IR	11709584:11709931-11709931:11710022-11710022:11710131	11709584:11710131	0.281	0.1074	1	0.445
BLCA	TCGA-E7-A6ME-01A-22R-A32O-07.dfffbe9c-c83a-4087-a3f7-2be3d63a2eaa.aligned		intron_retention_8113	FBXO2	ENSG00000116661.9	chr1 | -	IR	11709584:11709931-11709931:11710022-11710022:11710131	11709584:11710131	0.281	0.1074	1	0.445
BLCA	TCGA-E7-A6MF-01A-12R-A32O-07.791bcd93-c949-49b3-aaa4-4c8af82f5ec1.aligned	1	intron_retention_8113	FBXO2	ENSG00000116661.9	chr1 | -	IR	11709584:11709931-11709931:11710022-11710022:11710131	11709584:11710131	0.281	0.1074	1	0.445
BLCA	TCGA-E7-A7DU-01A-11R-A32O-07.c87fa518-41c5-417a-88ac-0b300f1a8732.aligned		intron_retention_8113	FBXO2	ENSG00000116661.9	chr1 | -	IR	11709584:11709931-11709931:11710022-11710022:11710131	11709584:11710131	0.281	0.1074	1	0.445
BLCA	TCGA-E7-A7DV-01A-11R-A33J-07.c8fd7f63-e309-4a7e-876d-7ca2cf954abe.aligned	1	intron_retention_8113	FBXO2	ENSG00000116661.9	chr1 | -	IR	11709584:11709931-11709931:11710022-11710022:11710131	11709584:11710131	0.281	0.1074	1	0.445
BLCA	TCGA-E7-A7PW-01A-11R-A352-07.73afa387-c132-48d6-82da-26517c161f13.aligned		intron_retention_8113	FBXO2	ENSG00000116661.9	chr1 | -	IR	11709584:11709931-11709931:11710022-11710022:11710131	11709584:11710131	0.281	0.1074	1	0.445
BLCA	TCGA-E7-A7XN-01A-11R-A352-07.a931a672-1565-4de6-9c64-d5a74f4cac1f.aligned		intron_retention_8113	FBXO2	ENSG00000116661.9	chr1 | -	IR	11709584:11709931-11709931:11710022-11710022:11710131	11709584:11710131	0.281	0.1074	1	0.445
BLCA	TCGA-E7-A85H-01A-11R-A352-07.1e9aa67a-52fe-4af3-8bbf-3597a57a4b72.aligned		intron_retention_8113	FBXO2	ENSG00000116661.9	chr1 | -	IR	11709584:11709931-11709931:11710022-11710022:11710131	11709584:11710131	0.281	0.1074	1	0.445
BLCA	TCGA-E7-A8O7-01A-11R-A36F-07.0379335d-61be-4142-9ba3-2676dd0945d8.aligned	1	intron_retention_8113	FBXO2	ENSG00000116661.9	chr1 | -	IR	11709584:11709931-11709931:11710022-11710022:11710131	11709584:11710131	0.281	0.1074	1	0.445
BLCA	TCGA-E7-A97P-01A-11R-A38B-07.f2282782-43ba-47a5-abba-1f412a2fc535.aligned		intron_retention_8113	FBXO2	ENSG00000116661.9	chr1 | -	IR	11709584:11709931-11709931:11710022-11710022:11710131	11709584:11710131	0.281	0.1074	1	0.445
BLCA	TCGA-E7-A97Q-01A-11R-A38B-07.90e6e8a1-98b3-4f38-92ef-df460d78d657.aligned	1	intron_retention_8113	FBXO2	ENSG00000116661.9	chr1 | -	IR	11709584:11709931-11709931:11710022-11710022:11710131	11709584:11710131	0.281	0.1074	1	0.445
BLCA	TCGA-FD-A3B3-01A-12R-A206-07.1cc49a56-ee39-4fd1-bf80-a6b71695c1f1.aligned	1	intron_retention_8113	FBXO2	ENSG00000116661.9	chr1 | -	IR	11709584:11709931-11709931:11710022-11710022:11710131	11709584:11710131	0.281	0.1074	1	0.445
BLCA	TCGA-FD-A3B4-01A-12R-A206-07.80e9793f-4e30-45ad-8660-3686685f2db9.aligned	1	intron_retention_8113	FBXO2	ENSG00000116661.9	chr1 | -	IR	11709584:11709931-11709931:11710022-11710022:11710131	11709584:11710131	0.281	0.1074	1	0.445
BLCA	TCGA-FD-A3B5-01A-11R-A20F-07.1afbe0f3-e320-4d74-8648-0c26ddbeab7f.aligned	1	intron_retention_8113	FBXO2	ENSG00000116661.9	chr1 | -	IR	11709584:11709931-11709931:11710022-11710022:11710131	11709584:11710131	0.281	0.1074	1	0.445
BLCA	TCGA-FD-A3B6-01A-21R-A20F-07.1a1e861c-14bd-45ea-904a-b14d4059ac95.aligned		intron_retention_8113	FBXO2	ENSG00000116661.9	chr1 | -	IR	11709584:11709931-11709931:11710022-11710022:11710131	11709584:11710131	0.281	0.1074	1	0.445
BLCA	TCGA-FD-A3B7-01A-31R-A20F-07.32d604cb-3bf5-427c-b60d-3c9cfeb7f0a5.aligned	1	intron_retention_8113	FBXO2	ENSG00000116661.9	chr1 | -	IR	11709584:11709931-11709931:11710022-11710022:11710131	11709584:11710131	0.281	0.1074	1	0.445
BLCA	TCGA-FD-A3B8-01A-31R-A20F-07.a45e5587-488f-4348-a724-fe64e0c5be7d.aligned	1	intron_retention_8113	FBXO2	ENSG00000116661.9	chr1 | -	IR	11709584:11709931-11709931:11710022-11710022:11710131	11709584:11710131	0.281	0.1074	1	0.445
BLCA	TCGA-FD-A3N5-01A-11R-A21D-07.e7925508-8b2f-4c39-bd7a-033e78b1f875.aligned		intron_retention_8113	FBXO2	ENSG00000116661.9	chr1 | -	IR	11709584:11709931-11709931:11710022-11710022:11710131	11709584:11710131	0.281	0.1074	1	0.445
BLCA	TCGA-FD-A3N6-01A-11R-A21D-07.575f9b1e-4952-488a-bbdd-ac98c1f68382.aligned	1	intron_retention_8113	FBXO2	ENSG00000116661.9	chr1 | -	IR	11709584:11709931-11709931:11710022-11710022:11710131	11709584:11710131	0.281	0.1074	1	0.445
BLCA	TCGA-FD-A3NA-01A-11R-A21D-07.bb0c2732-5fb4-44e7-bc62-a645cf1c1a56.aligned		intron_retention_8113	FBXO2	ENSG00000116661.9	chr1 | -	IR	11709584:11709931-11709931:11710022-11710022:11710131	11709584:11710131	0.281	0.1074	1	0.445
BLCA	TCGA-FD-A3SJ-01A-12R-A22U-07.B8AFE780-F680-40DB-A941-E984660FF90C.aligned	1	intron_retention_8113	FBXO2	ENSG00000116661.9	chr1 | -	IR	11709584:11709931-11709931:11710022-11710022:11710131	11709584:11710131	0.281	0.1074	1	0.445
BLCA	TCGA-FD-A3SL-01A-21R-A22U-07.D692892D-D63B-4AC2-9627-AE255AB17CAB.aligned		intron_retention_8113	FBXO2	ENSG00000116661.9	chr1 | -	IR	11709584:11709931-11709931:11710022-11710022:11710131	11709584:11710131	0.281	0.1074	1	0.445
BLCA	TCGA-FD-A3SM-01A-11R-A22U-07.AE3C4446-CB58-4B5B-9EB8-6C81E1BF4535.aligned	1	intron_retention_8113	FBXO2	ENSG00000116661.9	chr1 | -	IR	11709584:11709931-11709931:11710022-11710022:11710131	11709584:11710131	0.281	0.1074	1	0.445
BLCA	TCGA-FD-A3SN-01A-12R-A22U-07.41836F0E-F807-4AFA-AE39-C0EB16FA6B54.aligned	1	intron_retention_8113	FBXO2	ENSG00000116661.9	chr1 | -	IR	11709584:11709931-11709931:11710022-11710022:11710131	11709584:11710131	0.281	0.1074	1	0.445
BLCA	TCGA-FD-A3SO-01A-11R-A22U-07.BD1BA628-0CB5-4103-BAA4-3F430D24D359.aligned	1	intron_retention_8113	FBXO2	ENSG00000116661.9	chr1 | -	IR	11709584:11709931-11709931:11710022-11710022:11710131	11709584:11710131	0.281	0.1074	1	0.445
BLCA	TCGA-FD-A3SP-01A-31R-A22U-07.9AD7733F-A2A6-4985-8ED3-D2C539EEAB96.aligned		intron_retention_8113	FBXO2	ENSG00000116661.9	chr1 | -	IR	11709584:11709931-11709931:11710022-11710022:11710131	11709584:11710131	0.281	0.1074	1	0.445
BLCA	TCGA-FD-A3SQ-01A-21R-A22U-07.029CB0C8-9A67-4AF0-9137-A5FBE08FCE20.aligned	1	intron_retention_8113	FBXO2	ENSG00000116661.9	chr1 | -	IR	11709584:11709931-11709931:11710022-11710022:11710131	11709584:11710131	0.281	0.1074	1	0.445
BLCA	TCGA-FD-A3SR-01A-11R-A22U-07.DAFC2AF2-7B91-45A4-AE67-FE22AB060F06.aligned		intron_retention_8113	FBXO2	ENSG00000116661.9	chr1 | -	IR	11709584:11709931-11709931:11710022-11710022:11710131	11709584:11710131	0.281	0.1074	1	0.445
BLCA	TCGA-FD-A3SS-01A-12R-A22U-07.6AEC2686-FCEA-4D3E-8311-0B6CCAD4C000.aligned		intron_retention_8113	FBXO2	ENSG00000116661.9	chr1 | -	IR	11709584:11709931-11709931:11710022-11710022:11710131	11709584:11710131	0.281	0.1074	1	0.445
BLCA	TCGA-FD-A43N-01A-11R-A23W-07.043d2756-1abf-411f-aaac-b448ed088be1.aligned		intron_retention_8113	FBXO2	ENSG00000116661.9	chr1 | -	IR	11709584:11709931-11709931:11710022-11710022:11710131	11709584:11710131	0.281	0.1074	1	0.445
BLCA	TCGA-FD-A43P-01A-31R-A23W-07.0fa20811-219b-4d76-a8f6-d838e4de093e.aligned		intron_retention_8113	FBXO2	ENSG00000116661.9	chr1 | -	IR	11709584:11709931-11709931:11710022-11710022:11710131	11709584:11710131	0.281	0.1074	1	0.445
BLCA	TCGA-FD-A43U-01A-11R-A23W-07.1cd3bf53-27a7-4fda-8501-8270da2b8ceb.aligned		intron_retention_8113	FBXO2	ENSG00000116661.9	chr1 | -	IR	11709584:11709931-11709931:11710022-11710022:11710131	11709584:11710131	0.281	0.1074	1	0.445
BLCA	TCGA-FD-A43X-01A-11R-A23W-07.f68894de-6db1-472b-bbda-f1c6e60a818b.aligned		intron_retention_8113	FBXO2	ENSG00000116661.9	chr1 | -	IR	11709584:11709931-11709931:11710022-11710022:11710131	11709584:11710131	0.281	0.1074	1	0.445
BLCA	TCGA-FD-A43Y-01A-21R-A26T-07.5ee80128-f80f-4892-9668-43c03c41bd65.aligned	1	intron_retention_8113	FBXO2	ENSG00000116661.9	chr1 | -	IR	11709584:11709931-11709931:11710022-11710022:11710131	11709584:11710131	0.281	0.1074	1	0.445
BLCA	TCGA-FD-A5BR-01A-11R-A26T-07.8f1bfe41-e48c-4b5d-8b03-8def7666da02.aligned	1	intron_retention_8113	FBXO2	ENSG00000116661.9	chr1 | -	IR	11709584:11709931-11709931:11710022-11710022:11710131	11709584:11710131	0.281	0.1074	1	0.445
BLCA	TCGA-FD-A5BS-01A-21R-A26T-07.18bb3804-de1e-4988-abbf-89c36d07cc01.aligned	0.733	intron_retention_8113	FBXO2	ENSG00000116661.9	chr1 | -	IR	11709584:11709931-11709931:11710022-11710022:11710131	11709584:11710131	0.281	0.1074	1	0.445
BLCA	TCGA-FD-A5BU-01A-31R-A26T-07.06d4cd28-11fb-4f25-8ae0-3fa8e3f3e325.aligned		intron_retention_8113	FBXO2	ENSG00000116661.9	chr1 | -	IR	11709584:11709931-11709931:11710022-11710022:11710131	11709584:11710131	0.281	0.1074	1	0.445
BLCA	TCGA-FD-A5BY-01A-31R-A28M-07.94309b2e-c58c-4e2b-981d-0badb3872db7.aligned	1	intron_retention_8113	FBXO2	ENSG00000116661.9	chr1 | -	IR	11709584:11709931-11709931:11710022-11710022:11710131	11709584:11710131	0.281	0.1074	1	0.445
BLCA	TCGA-FD-A5BZ-01A-11R-A28M-07.ee7d92c6-8a20-41ec-8e43-7a7c462b13d5.aligned	1	intron_retention_8113	FBXO2	ENSG00000116661.9	chr1 | -	IR	11709584:11709931-11709931:11710022-11710022:11710131	11709584:11710131	0.281	0.1074	1	0.445
BLCA	TCGA-FD-A5C0-01A-11R-A28M-07.7773fd96-8ab7-417b-befd-ea63dc596a7a.aligned		intron_retention_8113	FBXO2	ENSG00000116661.9	chr1 | -	IR	11709584:11709931-11709931:11710022-11710022:11710131	11709584:11710131	0.281	0.1074	1	0.445
BLCA	TCGA-FD-A5C1-01A-11R-A28M-07.20da407e-268c-4a10-9d1f-751974e09067.aligned		intron_retention_8113	FBXO2	ENSG00000116661.9	chr1 | -	IR	11709584:11709931-11709931:11710022-11710022:11710131	11709584:11710131	0.281	0.1074	1	0.445
BLCA	TCGA-FD-A62N-01A-11R-A30C-07.d68e2da7-7bd4-4510-8751-02e9f16ad4e6.aligned	0.99	intron_retention_8113	FBXO2	ENSG00000116661.9	chr1 | -	IR	11709584:11709931-11709931:11710022-11710022:11710131	11709584:11710131	0.281	0.1074	1	0.445
BLCA	TCGA-FD-A62O-01A-11R-A30C-07.50fdf7c3-0e77-4013-ae2b-0e7c70b8d3e3.aligned		intron_retention_8113	FBXO2	ENSG00000116661.9	chr1 | -	IR	11709584:11709931-11709931:11710022-11710022:11710131	11709584:11710131	0.281	0.1074	1	0.445
BLCA	TCGA-FD-A62P-01A-32R-A30C-07.4a0b6e3c-a167-4ca6-876b-6fb82fa8fdb6.aligned		intron_retention_8113	FBXO2	ENSG00000116661.9	chr1 | -	IR	11709584:11709931-11709931:11710022-11710022:11710131	11709584:11710131	0.281	0.1074	1	0.445
BLCA	TCGA-FD-A62S-01A-11R-A30C-07.341d1383-93bd-42d7-80ad-5dba732c1925.aligned	0.635	intron_retention_8113	FBXO2	ENSG00000116661.9	chr1 | -	IR	11709584:11709931-11709931:11710022-11710022:11710131	11709584:11710131	0.281	0.1074	1	0.445
BLCA	TCGA-FD-A6TA-01A-12R-A33J-07.6321d37f-3658-447d-96a4-099e8072217a.aligned	1	intron_retention_8113	FBXO2	ENSG00000116661.9	chr1 | -	IR	11709584:11709931-11709931:11710022-11710022:11710131	11709584:11710131	0.281	0.1074	1	0.445
BLCA	TCGA-FD-A6TB-01A-12R-A33J-07.8038ffb4-38d5-437a-9457-4943c0202a8a.aligned	1	intron_retention_8113	FBXO2	ENSG00000116661.9	chr1 | -	IR	11709584:11709931-11709931:11710022-11710022:11710131	11709584:11710131	0.281	0.1074	1	0.445
BLCA	TCGA-FD-A6TC-01A-21R-A33J-07.30f1a64e-5df3-4e26-b820-a4254e7e3a7e.aligned		intron_retention_8113	FBXO2	ENSG00000116661.9	chr1 | -	IR	11709584:11709931-11709931:11710022-11710022:11710131	11709584:11710131	0.281	0.1074	1	0.445
BLCA	TCGA-FD-A6TD-01A-51R-A33J-07.f6660fcd-6277-4eb7-8135-5aea56fedd7c.aligned		intron_retention_8113	FBXO2	ENSG00000116661.9	chr1 | -	IR	11709584:11709931-11709931:11710022-11710022:11710131	11709584:11710131	0.281	0.1074	1	0.445
BLCA	TCGA-FD-A6TE-01A-12R-A33J-07.535736bf-6e19-4fc6-bf3d-a2fb4739c763.aligned		intron_retention_8113	FBXO2	ENSG00000116661.9	chr1 | -	IR	11709584:11709931-11709931:11710022-11710022:11710131	11709584:11710131	0.281	0.1074	1	0.445
BLCA	TCGA-FD-A6TF-01A-52R-A32O-07.fe6853dd-864f-4257-869f-a425aab32346.aligned		intron_retention_8113	FBXO2	ENSG00000116661.9	chr1 | -	IR	11709584:11709931-11709931:11710022-11710022:11710131	11709584:11710131	0.281	0.1074	1	0.445
BLCA	TCGA-FD-A6TG-01A-11R-A32O-07.088b27e8-38f6-41ff-a861-d371415fd7f0.aligned	1	intron_retention_8113	FBXO2	ENSG00000116661.9	chr1 | -	IR	11709584:11709931-11709931:11710022-11710022:11710131	11709584:11710131	0.281	0.1074	1	0.445
BLCA	TCGA-FD-A6TH-01A-11R-A32O-07.e71db8e9-8ee2-46dc-935a-3274f1fab863.aligned		intron_retention_8113	FBXO2	ENSG00000116661.9	chr1 | -	IR	11709584:11709931-11709931:11710022-11710022:11710131	11709584:11710131	0.281	0.1074	1	0.445
BLCA	TCGA-FD-A6TI-01A-11R-A32O-07.c1ce17a6-3e8b-41b7-97bc-9213b352ce84.aligned	1	intron_retention_8113	FBXO2	ENSG00000116661.9	chr1 | -	IR	11709584:11709931-11709931:11710022-11710022:11710131	11709584:11710131	0.281	0.1074	1	0.445
BLCA	TCGA-FD-A6TK-01A-42R-A33J-07.842484b0-6661-4dc2-bf70-b1216ab05475.aligned		intron_retention_8113	FBXO2	ENSG00000116661.9	chr1 | -	IR	11709584:11709931-11709931:11710022-11710022:11710131	11709584:11710131	0.281	0.1074	1	0.445
BLCA	TCGA-FJ-A3Z7-01A-12R-A23N-07.8c79f5ec-ce4f-4c86-8d1c-71495c276d74.aligned		intron_retention_8113	FBXO2	ENSG00000116661.9	chr1 | -	IR	11709584:11709931-11709931:11710022-11710022:11710131	11709584:11710131	0.281	0.1074	1	0.445
BLCA	TCGA-FJ-A3Z9-01A-11R-A26T-07.83c4827f-742b-42bf-96d0-335b484ee724.aligned		intron_retention_8113	FBXO2	ENSG00000116661.9	chr1 | -	IR	11709584:11709931-11709931:11710022-11710022:11710131	11709584:11710131	0.281	0.1074	1	0.445
BLCA	TCGA-FJ-A3ZE-01A-11R-A23N-07.f7df4f7f-cd8e-44ba-b16f-203d6049c4fa.aligned		intron_retention_8113	FBXO2	ENSG00000116661.9	chr1 | -	IR	11709584:11709931-11709931:11710022-11710022:11710131	11709584:11710131	0.281	0.1074	1	0.445
BLCA	TCGA-FJ-A3ZF-01A-11R-A23N-07.e68b253d-6149-4c42-a5b3-1ddc2448759b.aligned		intron_retention_8113	FBXO2	ENSG00000116661.9	chr1 | -	IR	11709584:11709931-11709931:11710022-11710022:11710131	11709584:11710131	0.281	0.1074	1	0.445
BLCA	TCGA-FJ-A871-01A-11R-A352-07.c19f7f59-5df6-4a57-91b0-635817d4fafd.aligned		intron_retention_8113	FBXO2	ENSG00000116661.9	chr1 | -	IR	11709584:11709931-11709931:11710022-11710022:11710131	11709584:11710131	0.281	0.1074	1	0.445
BLCA	TCGA-FT-A3EE-01A-11R-A206-07.1b08c8c9-5739-409d-9cbc-3b06ad1f60e6.aligned	1	intron_retention_8113	FBXO2	ENSG00000116661.9	chr1 | -	IR	11709584:11709931-11709931:11710022-11710022:11710131	11709584:11710131	0.281	0.1074	1	0.445
BLCA	TCGA-FT-A61P-01A-11R-A30C-07.370c2202-46b7-4721-a1db-ee80f6ca7782.aligned		intron_retention_8113	FBXO2	ENSG00000116661.9	chr1 | -	IR	11709584:11709931-11709931:11710022-11710022:11710131	11709584:11710131	0.281	0.1074	1	0.445
BLCA	TCGA-G2-A2EC-01A-11R-A180-07.61a9951d-6005-4d5a-a7ac-1146399de61c.aligned	0.594	intron_retention_8113	FBXO2	ENSG00000116661.9	chr1 | -	IR	11709584:11709931-11709931:11710022-11710022:11710131	11709584:11710131	0.281	0.1074	1	0.445
BLCA	TCGA-G2-A2EF-01A-12R-A18C-07.4000adba-115e-40bf-afbb-35ad20c4e416.aligned		intron_retention_8113	FBXO2	ENSG00000116661.9	chr1 | -	IR	11709584:11709931-11709931:11710022-11710022:11710131	11709584:11710131	0.281	0.1074	1	0.445
BLCA	TCGA-G2-A2EJ-01A-11R-A180-07.968143b4-2bc1-4c77-88e7-a907a7cd018c.aligned	1	intron_retention_8113	FBXO2	ENSG00000116661.9	chr1 | -	IR	11709584:11709931-11709931:11710022-11710022:11710131	11709584:11710131	0.281	0.1074	1	0.445
BLCA	TCGA-G2-A2EK-01A-22R-A18C-07.bc993392-5f2f-4cb8-8d27-26f3df2b3583.aligned	1	intron_retention_8113	FBXO2	ENSG00000116661.9	chr1 | -	IR	11709584:11709931-11709931:11710022-11710022:11710131	11709584:11710131	0.281	0.1074	1	0.445
BLCA	TCGA-G2-A2EL-01A-12R-A18C-07.3458d1fe-d159-4522-a627-70c5cc180daa.aligned	1	intron_retention_8113	FBXO2	ENSG00000116661.9	chr1 | -	IR	11709584:11709931-11709931:11710022-11710022:11710131	11709584:11710131	0.281	0.1074	1	0.445
BLCA	TCGA-G2-A2EO-01A-11R-A180-07.91c8d1c3-1afe-4c4c-ae81-7d1f989e0139.aligned		intron_retention_8113	FBXO2	ENSG00000116661.9	chr1 | -	IR	11709584:11709931-11709931:11710022-11710022:11710131	11709584:11710131	0.281	0.1074	1	0.445
BLCA	TCGA-G2-A2ES-01A-11R-A180-07.fac8f7fd-3e80-410a-a281-2b564862b335.aligned		intron_retention_8113	FBXO2	ENSG00000116661.9	chr1 | -	IR	11709584:11709931-11709931:11710022-11710022:11710131	11709584:11710131	0.281	0.1074	1	0.445
BLCA	TCGA-G2-A3IB-01A-11R-A20F-07.df755d45-141e-40d1-96c8-6bfe29c17edc.aligned		intron_retention_8113	FBXO2	ENSG00000116661.9	chr1 | -	IR	11709584:11709931-11709931:11710022-11710022:11710131	11709584:11710131	0.281	0.1074	1	0.445
BLCA	TCGA-G2-A3IE-01A-11R-A20F-07.eb59f0f9-3b20-4dce-833e-6a67076ddc01.aligned		intron_retention_8113	FBXO2	ENSG00000116661.9	chr1 | -	IR	11709584:11709931-11709931:11710022-11710022:11710131	11709584:11710131	0.281	0.1074	1	0.445
BLCA	TCGA-G2-A3VY-01A-11R-A22U-07.7D6EA81B-B8A5-4D3B-AA54-9BF51D8B698B.aligned		intron_retention_8113	FBXO2	ENSG00000116661.9	chr1 | -	IR	11709584:11709931-11709931:11710022-11710022:11710131	11709584:11710131	0.281	0.1074	1	0.445
BLCA	TCGA-G2-AA3D-01A-11R-A39I-07.0c23ff84-4469-485b-b3fd-2298cd6c8e42.aligned		intron_retention_8113	FBXO2	ENSG00000116661.9	chr1 | -	IR	11709584:11709931-11709931:11710022-11710022:11710131	11709584:11710131	0.281	0.1074	1	0.445
BLCA	TCGA-G2-AA3F-01A-12R-A42T-07.4b3c1687-622c-4c9f-9fe7-25b197629133.aligned		intron_retention_8113	FBXO2	ENSG00000116661.9	chr1 | -	IR	11709584:11709931-11709931:11710022-11710022:11710131	11709584:11710131	0.281	0.1074	1	0.445
BLCA	TCGA-GC-A3BM-01A-11R-A22U-07.8F7B5E84-55C2-4F98-A6A2-56B862161A98.aligned		intron_retention_8113	FBXO2	ENSG00000116661.9	chr1 | -	IR	11709584:11709931-11709931:11710022-11710022:11710131	11709584:11710131	0.281	0.1074	1	0.445
BLCA	TCGA-GC-A3BM-11A-11R-A22U-07.55F7869A-9583-4696-A281-B3C4EF4BD426.aligned		intron_retention_8113	FBXO2	ENSG00000116661.9	chr1 | -	IR	11709584:11709931-11709931:11710022-11710022:11710131	11709584:11710131	0.281	0.1074	1	0.445
BLCA	TCGA-GC-A3I6-01A-11R-A20F-07.652f8ab9-33b6-4e10-a84e-1e1b1ef0b707.aligned		intron_retention_8113	FBXO2	ENSG00000116661.9	chr1 | -	IR	11709584:11709931-11709931:11710022-11710022:11710131	11709584:11710131	0.281	0.1074	1	0.445
BLCA	TCGA-GC-A3OO-01A-11R-A22U-07.AD2EE4B7-EC51-4076-BC5B-6601B5ABEECB.aligned		intron_retention_8113	FBXO2	ENSG00000116661.9	chr1 | -	IR	11709584:11709931-11709931:11710022-11710022:11710131	11709584:11710131	0.281	0.1074	1	0.445
BLCA	TCGA-GC-A3RB-01A-12R-A220-07.5676C0EE-C460-492C-BF00-73D5DDB1D647.aligned		intron_retention_8113	FBXO2	ENSG00000116661.9	chr1 | -	IR	11709584:11709931-11709931:11710022-11710022:11710131	11709584:11710131	0.281	0.1074	1	0.445
BLCA	TCGA-GC-A3RC-01A-11R-A22U-07.3208F694-4779-4548-8CB4-74DF829B3345.aligned		intron_retention_8113	FBXO2	ENSG00000116661.9	chr1 | -	IR	11709584:11709931-11709931:11710022-11710022:11710131	11709584:11710131	0.281	0.1074	1	0.445
BLCA	TCGA-GC-A3RD-01A-12R-A22U-07.66132B23-E10A-49D9-89C5-129D7D98C17B.aligned	1	intron_retention_8113	FBXO2	ENSG00000116661.9	chr1 | -	IR	11709584:11709931-11709931:11710022-11710022:11710131	11709584:11710131	0.281	0.1074	1	0.445
BLCA	TCGA-GC-A3WC-01A-31R-A22U-07.3BEA01E7-E5BC-484B-91F4-A143CAED0AED.aligned		intron_retention_8113	FBXO2	ENSG00000116661.9	chr1 | -	IR	11709584:11709931-11709931:11710022-11710022:11710131	11709584:11710131	0.281	0.1074	1	0.445
BLCA	TCGA-GC-A3WC-11A-11R-A22U-07.2DBB5E17-F331-49BE-8BFA-314627FFB8A5.aligned		intron_retention_8113	FBXO2	ENSG00000116661.9	chr1 | -	IR	11709584:11709931-11709931:11710022-11710022:11710131	11709584:11710131	0.281	0.1074	1	0.445
BLCA	TCGA-GC-A3YS-01A-11R-A23N-07.10e3d6b9-8f72-4902-94ca-f89811b98e35.aligned	1	intron_retention_8113	FBXO2	ENSG00000116661.9	chr1 | -	IR	11709584:11709931-11709931:11710022-11710022:11710131	11709584:11710131	0.281	0.1074	1	0.445
BLCA	TCGA-GC-A4ZW-01A-11R-A26T-07.e7756fc3-3cc9-4417-a5c2-a69e67e8df10.aligned		intron_retention_8113	FBXO2	ENSG00000116661.9	chr1 | -	IR	11709584:11709931-11709931:11710022-11710022:11710131	11709584:11710131	0.281	0.1074	1	0.445
BLCA	TCGA-GC-A6I1-01A-12R-A31N-07.159e6f18-943e-4e7b-af13-da273c52dc16.aligned	1	intron_retention_8113	FBXO2	ENSG00000116661.9	chr1 | -	IR	11709584:11709931-11709931:11710022-11710022:11710131	11709584:11710131	0.281	0.1074	1	0.445
BLCA	TCGA-GD-A2C5-01A-12R-A180-07.b8ecfb28-27d0-4ad4-b73c-cc21be41af31.aligned		intron_retention_8113	FBXO2	ENSG00000116661.9	chr1 | -	IR	11709584:11709931-11709931:11710022-11710022:11710131	11709584:11710131	0.281	0.1074	1	0.445
BLCA	TCGA-GD-A2C5-11A-11R-A180-07.381f4721-580b-4b93-9988-862780e177bb.aligned		intron_retention_8113	FBXO2	ENSG00000116661.9	chr1 | -	IR	11709584:11709931-11709931:11710022-11710022:11710131	11709584:11710131	0.281	0.1074	1	0.445
BLCA	TCGA-GD-A3OP-01A-21R-A220-07.C7F36DBA-A507-46D3-8E68-7F98B8B645E9.aligned		intron_retention_8113	FBXO2	ENSG00000116661.9	chr1 | -	IR	11709584:11709931-11709931:11710022-11710022:11710131	11709584:11710131	0.281	0.1074	1	0.445
BLCA	TCGA-GD-A3OP-11A-11R-A220-07.4EBF0418-8DC9-45D3-A525-D5E2DDEF1FB5.aligned		intron_retention_8113	FBXO2	ENSG00000116661.9	chr1 | -	IR	11709584:11709931-11709931:11710022-11710022:11710131	11709584:11710131	0.281	0.1074	1	0.445
BLCA	TCGA-GD-A3OQ-01A-32R-A220-07.61B0ADD8-AD93-4F2A-A95B-FA257934962F.aligned		intron_retention_8113	FBXO2	ENSG00000116661.9	chr1 | -	IR	11709584:11709931-11709931:11710022-11710022:11710131	11709584:11710131	0.281	0.1074	1	0.445
BLCA	TCGA-GD-A3OQ-11A-21R-A220-07.BF1D6946-63B3-48CA-ADD1-1C5EC5CAFD22.aligned		intron_retention_8113	FBXO2	ENSG00000116661.9	chr1 | -	IR	11709584:11709931-11709931:11710022-11710022:11710131	11709584:11710131	0.281	0.1074	1	0.445
BLCA	TCGA-GD-A3OS-01A-12R-A220-07.80B2573F-D8E0-4D0D-84A6-301C5103267D.aligned	0.691	intron_retention_8113	FBXO2	ENSG00000116661.9	chr1 | -	IR	11709584:11709931-11709931:11710022-11710022:11710131	11709584:11710131	0.281	0.1074	1	0.445
BLCA	TCGA-GD-A76B-01A-11R-A32O-07.227c6e50-7801-4fb6-91d3-eda4313024bb.aligned		intron_retention_8113	FBXO2	ENSG00000116661.9	chr1 | -	IR	11709584:11709931-11709931:11710022-11710022:11710131	11709584:11710131	0.281	0.1074	1	0.445
BLCA	TCGA-GU-A42P-01A-11R-A23W-07.81018f98-fee6-4cde-b6f6-3b6254e3e8d7.aligned		intron_retention_8113	FBXO2	ENSG00000116661.9	chr1 | -	IR	11709584:11709931-11709931:11710022-11710022:11710131	11709584:11710131	0.281	0.1074	1	0.445
BLCA	TCGA-GU-A42Q-01A-11R-A23W-07.7668e1a3-cf31-411a-8bce-aff592a0f053.aligned		intron_retention_8113	FBXO2	ENSG00000116661.9	chr1 | -	IR	11709584:11709931-11709931:11710022-11710022:11710131	11709584:11710131	0.281	0.1074	1	0.445
BLCA	TCGA-GU-A42R-01A-11R-A23N-07.50dd2bb1-e069-42f8-89f4-1e3055adafee.aligned		intron_retention_8113	FBXO2	ENSG00000116661.9	chr1 | -	IR	11709584:11709931-11709931:11710022-11710022:11710131	11709584:11710131	0.281	0.1074	1	0.445
BLCA	TCGA-GU-A762-01A-11R-A33J-07.fa74ebb2-007d-407a-ba07-12976b75056d.aligned		intron_retention_8113	FBXO2	ENSG00000116661.9	chr1 | -	IR	11709584:11709931-11709931:11710022-11710022:11710131	11709584:11710131	0.281	0.1074	1	0.445
BLCA	TCGA-GU-A763-01A-11R-A32O-07.459468e0-79bc-4544-b168-27a85342d4c1.aligned		intron_retention_8113	FBXO2	ENSG00000116661.9	chr1 | -	IR	11709584:11709931-11709931:11710022-11710022:11710131	11709584:11710131	0.281	0.1074	1	0.445
BLCA	TCGA-GU-A764-01A-11R-A352-07.7fe70e80-a35e-4a3d-bfb5-e044aec3e6a2.aligned		intron_retention_8113	FBXO2	ENSG00000116661.9	chr1 | -	IR	11709584:11709931-11709931:11710022-11710022:11710131	11709584:11710131	0.281	0.1074	1	0.445
BLCA	TCGA-GU-A766-01A-11R-A32O-07.d6280a13-a376-4ede-8aab-7a7633cb3b9e.aligned		intron_retention_8113	FBXO2	ENSG00000116661.9	chr1 | -	IR	11709584:11709931-11709931:11710022-11710022:11710131	11709584:11710131	0.281	0.1074	1	0.445
BLCA	TCGA-GU-A767-01A-11R-A32O-07.3833acbb-2ea2-4442-90af-6b009ae2543b.aligned		intron_retention_8113	FBXO2	ENSG00000116661.9	chr1 | -	IR	11709584:11709931-11709931:11710022-11710022:11710131	11709584:11710131	0.281	0.1074	1	0.445
BLCA	TCGA-GU-AATP-01A-11R-A39I-07.6f3b244b-47b9-4af4-85c5-0051f6688aa8.aligned		intron_retention_8113	FBXO2	ENSG00000116661.9	chr1 | -	IR	11709584:11709931-11709931:11710022-11710022:11710131	11709584:11710131	0.281	0.1074	1	0.445
BLCA	TCGA-GU-AATQ-01A-11R-A39I-07.263c3285-8412-426e-a042-1e4266190a03.aligned		intron_retention_8113	FBXO2	ENSG00000116661.9	chr1 | -	IR	11709584:11709931-11709931:11710022-11710022:11710131	11709584:11710131	0.281	0.1074	1	0.445
BLCA	TCGA-GV-A3JV-01A-11R-A220-07.5DDB876D-DD32-4F33-89D1-D95E460E1E60.aligned		intron_retention_8113	FBXO2	ENSG00000116661.9	chr1 | -	IR	11709584:11709931-11709931:11710022-11710022:11710131	11709584:11710131	0.281	0.1074	1	0.445
BLCA	TCGA-GV-A3JW-01A-11R-A20F-07.57eda6ed-26b0-4bf6-98ad-80f4872b9832.aligned		intron_retention_8113	FBXO2	ENSG00000116661.9	chr1 | -	IR	11709584:11709931-11709931:11710022-11710022:11710131	11709584:11710131	0.281	0.1074	1	0.445
BLCA	TCGA-GV-A3JX-01A-11R-A20F-07.388f02e0-68bb-4be2-9271-60a42d3a3e9d.aligned	1	intron_retention_8113	FBXO2	ENSG00000116661.9	chr1 | -	IR	11709584:11709931-11709931:11710022-11710022:11710131	11709584:11710131	0.281	0.1074	1	0.445
BLCA	TCGA-GV-A3JZ-01A-11R-A21D-07.f3872d71-1889-4756-bdb4-d5ae383758a8.aligned		intron_retention_8113	FBXO2	ENSG00000116661.9	chr1 | -	IR	11709584:11709931-11709931:11710022-11710022:11710131	11709584:11710131	0.281	0.1074	1	0.445
BLCA	TCGA-GV-A3QF-01A-31R-A22U-07.F732F86B-5190-4827-8471-656A43B47681.aligned	1	intron_retention_8113	FBXO2	ENSG00000116661.9	chr1 | -	IR	11709584:11709931-11709931:11710022-11710022:11710131	11709584:11710131	0.281	0.1074	1	0.445
BLCA	TCGA-GV-A3QG-01A-11R-A220-07.D7C8FAB5-A3C9-4650-9935-56C0FE27CBE6.aligned	1	intron_retention_8113	FBXO2	ENSG00000116661.9	chr1 | -	IR	11709584:11709931-11709931:11710022-11710022:11710131	11709584:11710131	0.281	0.1074	1	0.445
BLCA	TCGA-GV-A3QH-01A-11R-A220-07.DC901511-9E0F-4FC6-B6F4-BEE8E627CE25.aligned		intron_retention_8113	FBXO2	ENSG00000116661.9	chr1 | -	IR	11709584:11709931-11709931:11710022-11710022:11710131	11709584:11710131	0.281	0.1074	1	0.445
BLCA	TCGA-GV-A3QI-01A-11R-A220-07.EA9D4BD8-1F4E-4AD5-81F7-803B078F2603.aligned		intron_retention_8113	FBXO2	ENSG00000116661.9	chr1 | -	IR	11709584:11709931-11709931:11710022-11710022:11710131	11709584:11710131	0.281	0.1074	1	0.445
BLCA	TCGA-GV-A3QK-01B-11R-A23N-07.bd5b7c93-fabe-4bb8-a78f-981aeed75d79.aligned		intron_retention_8113	FBXO2	ENSG00000116661.9	chr1 | -	IR	11709584:11709931-11709931:11710022-11710022:11710131	11709584:11710131	0.281	0.1074	1	0.445
BLCA	TCGA-GV-A40E-01A-12R-A23N-07.221bd562-e77d-4374-9491-efb5c3b026c3.aligned	1	intron_retention_8113	FBXO2	ENSG00000116661.9	chr1 | -	IR	11709584:11709931-11709931:11710022-11710022:11710131	11709584:11710131	0.281	0.1074	1	0.445
BLCA	TCGA-GV-A40G-01A-11R-A23N-07.73220a3d-e4e3-4494-a832-86baa98333b4.aligned		intron_retention_8113	FBXO2	ENSG00000116661.9	chr1 | -	IR	11709584:11709931-11709931:11710022-11710022:11710131	11709584:11710131	0.281	0.1074	1	0.445
BLCA	TCGA-GV-A6ZA-01A-12R-A33J-07.5d19bc28-408e-4dc6-bc4b-95b28fa0dddc.aligned		intron_retention_8113	FBXO2	ENSG00000116661.9	chr1 | -	IR	11709584:11709931-11709931:11710022-11710022:11710131	11709584:11710131	0.281	0.1074	1	0.445
BLCA	TCGA-H4-A2HO-01A-11R-A180-07.eb5b988d-308e-4afb-b21b-8bdd45010c72.aligned		intron_retention_8113	FBXO2	ENSG00000116661.9	chr1 | -	IR	11709584:11709931-11709931:11710022-11710022:11710131	11709584:11710131	0.281	0.1074	1	0.445
BLCA	TCGA-H4-A2HQ-01A-11R-A180-07.2c681223-21a5-4c58-acbb-2d51516bff12.aligned		intron_retention_8113	FBXO2	ENSG00000116661.9	chr1 | -	IR	11709584:11709931-11709931:11710022-11710022:11710131	11709584:11710131	0.281	0.1074	1	0.445
BLCA	TCGA-HQ-A2OE-01A-11R-A206-07.eb210789-9eb4-4def-a83d-3f0254b3c6dd.aligned		intron_retention_8113	FBXO2	ENSG00000116661.9	chr1 | -	IR	11709584:11709931-11709931:11710022-11710022:11710131	11709584:11710131	0.281	0.1074	1	0.445
BLCA	TCGA-HQ-A2OF-01A-11R-A26T-07.99471b35-21e6-44cb-863e-d60521a71b31.aligned	1	intron_retention_8113	FBXO2	ENSG00000116661.9	chr1 | -	IR	11709584:11709931-11709931:11710022-11710022:11710131	11709584:11710131	0.281	0.1074	1	0.445
BLCA	TCGA-HQ-A5ND-01A-11R-A26T-07.a56ef438-c2ac-4c6f-9283-59e38ba14f28.aligned		intron_retention_8113	FBXO2	ENSG00000116661.9	chr1 | -	IR	11709584:11709931-11709931:11710022-11710022:11710131	11709584:11710131	0.281	0.1074	1	0.445
BLCA	TCGA-HQ-A5NE-01A-12R-A28M-07.6621636c-4a29-4ad3-99bc-406b1820d063.aligned		intron_retention_8113	FBXO2	ENSG00000116661.9	chr1 | -	IR	11709584:11709931-11709931:11710022-11710022:11710131	11709584:11710131	0.281	0.1074	1	0.445
BLCA	TCGA-K4-A3WS-01A-11R-A22U-07.BF7A27D9-35A8-4C59-BF27-E3FA9B271E6E.aligned		intron_retention_8113	FBXO2	ENSG00000116661.9	chr1 | -	IR	11709584:11709931-11709931:11710022-11710022:11710131	11709584:11710131	0.281	0.1074	1	0.445
BLCA	TCGA-K4-A3WU-01B-11R-A23N-07.6c392517-fe3d-4d86-8397-c08734fe20cc.aligned	0.922	intron_retention_8113	FBXO2	ENSG00000116661.9	chr1 | -	IR	11709584:11709931-11709931:11710022-11710022:11710131	11709584:11710131	0.281	0.1074	1	0.445
BLCA	TCGA-K4-A3WV-01A-11R-A22U-07.80DDBBC6-11FF-469A-96EC-A72E0E2EC9C4.aligned		intron_retention_8113	FBXO2	ENSG00000116661.9	chr1 | -	IR	11709584:11709931-11709931:11710022-11710022:11710131	11709584:11710131	0.281	0.1074	1	0.445
BLCA	TCGA-K4-A3WV-11A-21R-A22U-07.20D3AC92-E654-415E-8031-5A8BDD1662B3.aligned		intron_retention_8113	FBXO2	ENSG00000116661.9	chr1 | -	IR	11709584:11709931-11709931:11710022-11710022:11710131	11709584:11710131	0.281	0.1074	1	0.445
BLCA	TCGA-K4-A4AB-01B-12R-A28M-07.d27207d8-a3cf-475b-963a-e393eef98538.aligned	0.649	intron_retention_8113	FBXO2	ENSG00000116661.9	chr1 | -	IR	11709584:11709931-11709931:11710022-11710022:11710131	11709584:11710131	0.281	0.1074	1	0.445
BLCA	TCGA-K4-A4AC-01A-21R-A26T-07.90c55ddf-3ac3-4599-80f6-e29e486d2070.aligned	1	intron_retention_8113	FBXO2	ENSG00000116661.9	chr1 | -	IR	11709584:11709931-11709931:11710022-11710022:11710131	11709584:11710131	0.281	0.1074	1	0.445
BLCA	TCGA-K4-A54R-01A-11R-A26T-07.e9acf520-2eb5-4b29-84c8-10ae6c5919e7.aligned		intron_retention_8113	FBXO2	ENSG00000116661.9	chr1 | -	IR	11709584:11709931-11709931:11710022-11710022:11710131	11709584:11710131	0.281	0.1074	1	0.445
BLCA	TCGA-K4-A54R-11A-11R-A26T-07.fea0469f-786a-4203-95c9-60d0f76c9045.aligned		intron_retention_8113	FBXO2	ENSG00000116661.9	chr1 | -	IR	11709584:11709931-11709931:11710022-11710022:11710131	11709584:11710131	0.281	0.1074	1	0.445
BLCA	TCGA-K4-A5RH-01A-11R-A30C-07.a83e6d94-8bef-4ffe-889a-2eecc4b97cae.aligned		intron_retention_8113	FBXO2	ENSG00000116661.9	chr1 | -	IR	11709584:11709931-11709931:11710022-11710022:11710131	11709584:11710131	0.281	0.1074	1	0.445
BLCA	TCGA-K4-A5RI-01A-11R-A28M-07.d3cf6983-3dfc-4533-8809-605c197fc24e.aligned		intron_retention_8113	FBXO2	ENSG00000116661.9	chr1 | -	IR	11709584:11709931-11709931:11710022-11710022:11710131	11709584:11710131	0.281	0.1074	1	0.445
BLCA	TCGA-K4-A5RI-11A-11R-A28M-07.74ba151c-f3c8-4f11-8940-1cefb87570a7.aligned		intron_retention_8113	FBXO2	ENSG00000116661.9	chr1 | -	IR	11709584:11709931-11709931:11710022-11710022:11710131	11709584:11710131	0.281	0.1074	1	0.445
BLCA	TCGA-K4-A5RJ-01A-11R-A28M-07.57baff29-25d2-46ce-937f-f25343dcebc3.aligned		intron_retention_8113	FBXO2	ENSG00000116661.9	chr1 | -	IR	11709584:11709931-11709931:11710022-11710022:11710131	11709584:11710131	0.281	0.1074	1	0.445
BLCA	TCGA-K4-A6FZ-01A-11R-A31N-07.f873fe6d-9733-48a9-b7e0-23dc50874fbc.aligned		intron_retention_8113	FBXO2	ENSG00000116661.9	chr1 | -	IR	11709584:11709931-11709931:11710022-11710022:11710131	11709584:11710131	0.281	0.1074	1	0.445
BLCA	TCGA-K4-A6MB-01A-11R-A31N-07.7e8935da-773b-4337-8fa2-f52ebbaceaee.aligned		intron_retention_8113	FBXO2	ENSG00000116661.9	chr1 | -	IR	11709584:11709931-11709931:11710022-11710022:11710131	11709584:11710131	0.281	0.1074	1	0.445
BLCA	TCGA-K4-A83P-01A-11R-A352-07.b19c4e9c-2caf-436b-b728-9849b668c663.aligned		intron_retention_8113	FBXO2	ENSG00000116661.9	chr1 | -	IR	11709584:11709931-11709931:11710022-11710022:11710131	11709584:11710131	0.281	0.1074	1	0.445
BLCA	TCGA-K4-AAQO-01A-11R-A38B-07.9da50002-f2ba-4a66-8668-79386cf5ea4d.aligned		intron_retention_8113	FBXO2	ENSG00000116661.9	chr1 | -	IR	11709584:11709931-11709931:11710022-11710022:11710131	11709584:11710131	0.281	0.1074	1	0.445
BLCA	TCGA-KQ-A41N-01A-11R-A33J-07.2d83d812-8f9b-443b-8643-dd3104b5068e.aligned	1	intron_retention_8113	FBXO2	ENSG00000116661.9	chr1 | -	IR	11709584:11709931-11709931:11710022-11710022:11710131	11709584:11710131	0.281	0.1074	1	0.445
BLCA	TCGA-KQ-A41O-01A-12R-A352-07.728aaa87-e83d-47ff-9559-5f2de0152949.aligned		intron_retention_8113	FBXO2	ENSG00000116661.9	chr1 | -	IR	11709584:11709931-11709931:11710022-11710022:11710131	11709584:11710131	0.281	0.1074	1	0.445
BLCA	TCGA-KQ-A41P-01A-12R-A33J-07.4c23170b-a5e0-41c8-8309-a5bfb2823491.aligned		intron_retention_8113	FBXO2	ENSG00000116661.9	chr1 | -	IR	11709584:11709931-11709931:11710022-11710022:11710131	11709584:11710131	0.281	0.1074	1	0.445
BLCA	TCGA-KQ-A41Q-01A-11R-A33J-07.c130027b-a3f5-49be-b26d-a0416b7904b5.aligned		intron_retention_8113	FBXO2	ENSG00000116661.9	chr1 | -	IR	11709584:11709931-11709931:11710022-11710022:11710131	11709584:11710131	0.281	0.1074	1	0.445
BLCA	TCGA-KQ-A41R-01A-21R-A352-07.9c9b4aa6-08b2-43f3-b68b-995df66c0494.aligned		intron_retention_8113	FBXO2	ENSG00000116661.9	chr1 | -	IR	11709584:11709931-11709931:11710022-11710022:11710131	11709584:11710131	0.281	0.1074	1	0.445
BLCA	TCGA-KQ-A41S-01A-12R-A33J-07.ed8b8326-fa77-4e72-b146-49c0543a5792.aligned		intron_retention_8113	FBXO2	ENSG00000116661.9	chr1 | -	IR	11709584:11709931-11709931:11710022-11710022:11710131	11709584:11710131	0.281	0.1074	1	0.445
BLCA	TCGA-LC-A66R-01A-41R-A30C-07.538ad820-310d-4463-83a2-44ce1cac920c.aligned		intron_retention_8113	FBXO2	ENSG00000116661.9	chr1 | -	IR	11709584:11709931-11709931:11710022-11710022:11710131	11709584:11710131	0.281	0.1074	1	0.445
BLCA	TCGA-LT-A5Z6-01A-11R-A28M-07.1002d9de-3bd1-4d22-8f2a-64b3114264e0.aligned		intron_retention_8113	FBXO2	ENSG00000116661.9	chr1 | -	IR	11709584:11709931-11709931:11710022-11710022:11710131	11709584:11710131	0.281	0.1074	1	0.445
BLCA	TCGA-LT-A8JT-01A-11R-A36F-07.85f596e4-9591-49f5-8408-25e4ce16c7f7.aligned		intron_retention_8113	FBXO2	ENSG00000116661.9	chr1 | -	IR	11709584:11709931-11709931:11710022-11710022:11710131	11709584:11710131	0.281	0.1074	1	0.445
BLCA	TCGA-MV-A51V-01A-11R-A26T-07.4c8aa0aa-c1ae-4aff-96f2-4636bb1d5c47.aligned		intron_retention_8113	FBXO2	ENSG00000116661.9	chr1 | -	IR	11709584:11709931-11709931:11710022-11710022:11710131	11709584:11710131	0.281	0.1074	1	0.445
BLCA	TCGA-PQ-A6FI-01A-11R-A31N-07.74cbc344-560b-439b-bd14-1542ce579967.aligned		intron_retention_8113	FBXO2	ENSG00000116661.9	chr1 | -	IR	11709584:11709931-11709931:11710022-11710022:11710131	11709584:11710131	0.281	0.1074	1	0.445
BLCA	TCGA-R3-A69X-01A-22R-A30C-07.c394bf58-ce01-4ad3-a0f7-f2c5a251356d.aligned	0.8	intron_retention_8113	FBXO2	ENSG00000116661.9	chr1 | -	IR	11709584:11709931-11709931:11710022-11710022:11710131	11709584:11710131	0.281	0.1074	1	0.445
BLCA	TCGA-S5-AA26-01A-11R-A38B-07.fd9b4ba5-8cb9-4867-81c9-33c608584488.aligned		intron_retention_8113	FBXO2	ENSG00000116661.9	chr1 | -	IR	11709584:11709931-11709931:11710022-11710022:11710131	11709584:11710131	0.281	0.1074	1	0.445
BLCA	TCGA-SY-A9G0-01A-12R-A38B-07.97226f81-8074-4b17-bcc7-c74e51216706.aligned		intron_retention_8113	FBXO2	ENSG00000116661.9	chr1 | -	IR	11709584:11709931-11709931:11710022-11710022:11710131	11709584:11710131	0.281	0.1074	1	0.445
BLCA	TCGA-SY-A9G5-01A-11R-A38B-07.183b63ef-c966-4348-a989-9c7e2b4a8082.aligned		intron_retention_8113	FBXO2	ENSG00000116661.9	chr1 | -	IR	11709584:11709931-11709931:11710022-11710022:11710131	11709584:11710131	0.281	0.1074	1	0.445
BLCA	TCGA-UY-A78K-01A-11R-A33J-07.d31897c3-5d0a-4104-bdc6-4b12eb061c2a.aligned		intron_retention_8113	FBXO2	ENSG00000116661.9	chr1 | -	IR	11709584:11709931-11709931:11710022-11710022:11710131	11709584:11710131	0.281	0.1074	1	0.445
BLCA	TCGA-UY-A78L-01A-12R-A33J-07.e356927b-b100-4adf-9935-e4fbf31d1fd3.aligned	1	intron_retention_8113	FBXO2	ENSG00000116661.9	chr1 | -	IR	11709584:11709931-11709931:11710022-11710022:11710131	11709584:11710131	0.281	0.1074	1	0.445
BLCA	TCGA-UY-A78M-01A-21R-A352-07.49951b76-0020-4c3c-a279-8175c82c3bc6.aligned		intron_retention_8113	FBXO2	ENSG00000116661.9	chr1 | -	IR	11709584:11709931-11709931:11710022-11710022:11710131	11709584:11710131	0.281	0.1074	1	0.445
BLCA	TCGA-UY-A78N-01A-12R-A33J-07.fd7fac82-d8e3-4133-be0e-ec5b2badc5d1.aligned		intron_retention_8113	FBXO2	ENSG00000116661.9	chr1 | -	IR	11709584:11709931-11709931:11710022-11710022:11710131	11709584:11710131	0.281	0.1074	1	0.445
BLCA	TCGA-UY-A78O-01A-12R-A33J-07.2480ce78-21a7-4717-8b08-8176d9fe6834.aligned		intron_retention_8113	FBXO2	ENSG00000116661.9	chr1 | -	IR	11709584:11709931-11709931:11710022-11710022:11710131	11709584:11710131	0.281	0.1074	1	0.445
BLCA	TCGA-UY-A78P-01A-12R-A36F-07.500beee6-a0cf-44aa-9102-de22b7210aba.aligned		intron_retention_8113	FBXO2	ENSG00000116661.9	chr1 | -	IR	11709584:11709931-11709931:11710022-11710022:11710131	11709584:11710131	0.281	0.1074	1	0.445
BLCA	TCGA-UY-A8OB-01A-12R-A42T-07.fb37dcdd-00a6-49b7-b0ca-1fe0d9c4782a.aligned	1	intron_retention_8113	FBXO2	ENSG00000116661.9	chr1 | -	IR	11709584:11709931-11709931:11710022-11710022:11710131	11709584:11710131	0.281	0.1074	1	0.445
BLCA	TCGA-UY-A8OC-01A-11R-A36F-07.59551fc3-7885-44d9-bf8a-ffdd5bea8238.aligned		intron_retention_8113	FBXO2	ENSG00000116661.9	chr1 | -	IR	11709584:11709931-11709931:11710022-11710022:11710131	11709584:11710131	0.281	0.1074	1	0.445
BLCA	TCGA-UY-A8OD-01A-11R-A36F-07.1330c062-9641-4d39-a09f-18aebaa90550.aligned		intron_retention_8113	FBXO2	ENSG00000116661.9	chr1 | -	IR	11709584:11709931-11709931:11710022-11710022:11710131	11709584:11710131	0.281	0.1074	1	0.445
BLCA	TCGA-UY-A9PA-01A-11R-A38B-07.c2a2d7ab-c8d6-4481-9e91-1f16969e8105.aligned		intron_retention_8113	FBXO2	ENSG00000116661.9	chr1 | -	IR	11709584:11709931-11709931:11710022-11710022:11710131	11709584:11710131	0.281	0.1074	1	0.445
BLCA	TCGA-UY-A9PB-01A-11R-A38B-07.d9954580-b237-40a2-b4a3-3ce2482f8da2.aligned	0.697	intron_retention_8113	FBXO2	ENSG00000116661.9	chr1 | -	IR	11709584:11709931-11709931:11710022-11710022:11710131	11709584:11710131	0.281	0.1074	1	0.445
BLCA	TCGA-UY-A9PD-01A-11R-A38B-07.417805b3-9c10-4724-ab87-480c773f7d16.aligned		intron_retention_8113	FBXO2	ENSG00000116661.9	chr1 | -	IR	11709584:11709931-11709931:11710022-11710022:11710131	11709584:11710131	0.281	0.1074	1	0.445
BLCA	TCGA-UY-A9PE-01A-11R-A38B-07.394c0fda-d609-4a29-a758-c3b984e50d1d.aligned		intron_retention_8113	FBXO2	ENSG00000116661.9	chr1 | -	IR	11709584:11709931-11709931:11710022-11710022:11710131	11709584:11710131	0.281	0.1074	1	0.445
BLCA	TCGA-UY-A9PF-01A-11R-A38B-07.6f82f237-061e-47ae-a3fa-d03b6aeb1c1b.aligned	1	intron_retention_8113	FBXO2	ENSG00000116661.9	chr1 | -	IR	11709584:11709931-11709931:11710022-11710022:11710131	11709584:11710131	0.281	0.1074	1	0.445
BLCA	TCGA-UY-A9PH-01A-11R-A38B-07.2a3b1b1a-9364-4bb2-beca-6933f88204c5.aligned		intron_retention_8113	FBXO2	ENSG00000116661.9	chr1 | -	IR	11709584:11709931-11709931:11710022-11710022:11710131	11709584:11710131	0.281	0.1074	1	0.445
BLCA	TCGA-XF-A8HB-01A-11R-A36F-07.7bee34e3-b559-48e9-bbc3-2d162b8f128a.aligned		intron_retention_8113	FBXO2	ENSG00000116661.9	chr1 | -	IR	11709584:11709931-11709931:11710022-11710022:11710131	11709584:11710131	0.281	0.1074	1	0.445
BLCA	TCGA-XF-A8HC-01A-11R-A36F-07.bd8b95cf-34c9-4bc1-98fd-6c7e1c20680b.aligned		intron_retention_8113	FBXO2	ENSG00000116661.9	chr1 | -	IR	11709584:11709931-11709931:11710022-11710022:11710131	11709584:11710131	0.281	0.1074	1	0.445
BLCA	TCGA-XF-A8HD-01A-11R-A36F-07.f40981b0-a1e6-43d2-ae38-c2a7d6166fbf.aligned		intron_retention_8113	FBXO2	ENSG00000116661.9	chr1 | -	IR	11709584:11709931-11709931:11710022-11710022:11710131	11709584:11710131	0.281	0.1074	1	0.445
BLCA	TCGA-XF-A8HE-01A-11R-A36F-07.06c37fa7-a8d3-4727-ba1d-69b584b8f585.aligned		intron_retention_8113	FBXO2	ENSG00000116661.9	chr1 | -	IR	11709584:11709931-11709931:11710022-11710022:11710131	11709584:11710131	0.281	0.1074	1	0.445
BLCA	TCGA-XF-A8HF-01A-11R-A36F-07.74bf5bf4-7a66-4316-9b43-a85db455dfd3.aligned	1	intron_retention_8113	FBXO2	ENSG00000116661.9	chr1 | -	IR	11709584:11709931-11709931:11710022-11710022:11710131	11709584:11710131	0.281	0.1074	1	0.445
BLCA	TCGA-XF-A8HG-01A-11R-A36F-07.79b6d16e-cc87-416d-8440-2aa9ad3ed3d3.aligned		intron_retention_8113	FBXO2	ENSG00000116661.9	chr1 | -	IR	11709584:11709931-11709931:11710022-11710022:11710131	11709584:11710131	0.281	0.1074	1	0.445
BLCA	TCGA-XF-A8HH-01A-11R-A38B-07.d9f01cb3-7b78-4330-9a2c-5923cdbfa142.aligned		intron_retention_8113	FBXO2	ENSG00000116661.9	chr1 | -	IR	11709584:11709931-11709931:11710022-11710022:11710131	11709584:11710131	0.281	0.1074	1	0.445
BLCA	TCGA-XF-A8HI-01A-11R-A38B-07.9bd649f6-9b08-4d26-87b9-a6901a00f2ba.aligned		intron_retention_8113	FBXO2	ENSG00000116661.9	chr1 | -	IR	11709584:11709931-11709931:11710022-11710022:11710131	11709584:11710131	0.281	0.1074	1	0.445
BLCA	TCGA-XF-A9SH-01A-11R-A39I-07.1e640951-76e2-4691-bfda-301e6bd11c47.aligned	0.65	intron_retention_8113	FBXO2	ENSG00000116661.9	chr1 | -	IR	11709584:11709931-11709931:11710022-11710022:11710131	11709584:11710131	0.281	0.1074	1	0.445
BLCA	TCGA-XF-A9SI-01A-11R-A39I-07.dee47fe6-4c8e-4801-abae-d3a03be1ea8e.aligned	0.953	intron_retention_8113	FBXO2	ENSG00000116661.9	chr1 | -	IR	11709584:11709931-11709931:11710022-11710022:11710131	11709584:11710131	0.281	0.1074	1	0.445
BLCA	TCGA-XF-A9SJ-01A-11R-A39I-07.bdf3914e-37f0-4dc2-a246-b22c6ee15f81.aligned	1	intron_retention_8113	FBXO2	ENSG00000116661.9	chr1 | -	IR	11709584:11709931-11709931:11710022-11710022:11710131	11709584:11710131	0.281	0.1074	1	0.445
BLCA	TCGA-XF-A9SK-01A-11R-A42T-07.1e48f03f-3939-4dfd-8d32-c85ec473678a.aligned	0.759	intron_retention_8113	FBXO2	ENSG00000116661.9	chr1 | -	IR	11709584:11709931-11709931:11710022-11710022:11710131	11709584:11710131	0.281	0.1074	1	0.445
BLCA	TCGA-XF-A9SL-01A-11R-A39I-07.c5f00487-d24a-46fc-9f15-f7fc22e28e0b.aligned		intron_retention_8113	FBXO2	ENSG00000116661.9	chr1 | -	IR	11709584:11709931-11709931:11710022-11710022:11710131	11709584:11710131	0.281	0.1074	1	0.445
BLCA	TCGA-XF-A9SM-01A-11R-A42T-07.2ffd7576-f25e-44f1-ba9f-7db6030aa0c6.aligned	1	intron_retention_8113	FBXO2	ENSG00000116661.9	chr1 | -	IR	11709584:11709931-11709931:11710022-11710022:11710131	11709584:11710131	0.281	0.1074	1	0.445
BLCA	TCGA-XF-A9SP-01A-11R-A39I-07.f279c9db-8b02-4df1-883c-28373ec10636.aligned		intron_retention_8113	FBXO2	ENSG00000116661.9	chr1 | -	IR	11709584:11709931-11709931:11710022-11710022:11710131	11709584:11710131	0.281	0.1074	1	0.445
BLCA	TCGA-XF-A9ST-01A-11R-A42T-07.378c51fa-27d3-4e70-a471-9f1006513d24.aligned		intron_retention_8113	FBXO2	ENSG00000116661.9	chr1 | -	IR	11709584:11709931-11709931:11710022-11710022:11710131	11709584:11710131	0.281	0.1074	1	0.445
BLCA	TCGA-XF-A9SV-01A-21R-A42T-07.d855e064-11e2-436f-8433-b114b4709247.aligned		intron_retention_8113	FBXO2	ENSG00000116661.9	chr1 | -	IR	11709584:11709931-11709931:11710022-11710022:11710131	11709584:11710131	0.281	0.1074	1	0.445
BLCA	TCGA-XF-A9SY-01A-21R-A42T-07.1e4801e3-d021-46c7-a157-0b2a2fc59cf7.aligned	1	intron_retention_8113	FBXO2	ENSG00000116661.9	chr1 | -	IR	11709584:11709931-11709931:11710022-11710022:11710131	11709584:11710131	0.281	0.1074	1	0.445
BLCA	TCGA-XF-A9SZ-01A-11R-A39I-07.73a57b9f-d780-4556-bf25-b75c2f75340e.aligned		intron_retention_8113	FBXO2	ENSG00000116661.9	chr1 | -	IR	11709584:11709931-11709931:11710022-11710022:11710131	11709584:11710131	0.281	0.1074	1	0.445
BLCA	TCGA-XF-A9T0-01A-11R-A39I-07.fe25dbd6-adbf-47a3-9929-f392d5347bde.aligned		intron_retention_8113	FBXO2	ENSG00000116661.9	chr1 | -	IR	11709584:11709931-11709931:11710022-11710022:11710131	11709584:11710131	0.281	0.1074	1	0.445
BLCA	TCGA-XF-A9T2-01A-11R-A42T-07.5ca8593d-7217-476e-ae05-aa22fd11c332.aligned		intron_retention_8113	FBXO2	ENSG00000116661.9	chr1 | -	IR	11709584:11709931-11709931:11710022-11710022:11710131	11709584:11710131	0.281	0.1074	1	0.445
BLCA	TCGA-XF-A9T3-01A-11R-A42T-07.2dd4a5e0-3008-4615-bcc5-9cc8d9a708b2.aligned		intron_retention_8113	FBXO2	ENSG00000116661.9	chr1 | -	IR	11709584:11709931-11709931:11710022-11710022:11710131	11709584:11710131	0.281	0.1074	1	0.445
BLCA	TCGA-XF-A9T4-01A-11R-A39I-07.3a644871-42e4-44b0-901e-512596a018b1.aligned	1	intron_retention_8113	FBXO2	ENSG00000116661.9	chr1 | -	IR	11709584:11709931-11709931:11710022-11710022:11710131	11709584:11710131	0.281	0.1074	1	0.445
BLCA	TCGA-XF-A9T5-01A-11R-A42T-07.a126ebd8-a7e3-4ea6-92a4-cf8a3a99b19b.aligned		intron_retention_8113	FBXO2	ENSG00000116661.9	chr1 | -	IR	11709584:11709931-11709931:11710022-11710022:11710131	11709584:11710131	0.281	0.1074	1	0.445
BLCA	TCGA-XF-A9T6-01A-11R-A42T-07.cbc184c2-4bda-4a56-9b49-453f503e16ab.aligned	1	intron_retention_8113	FBXO2	ENSG00000116661.9	chr1 | -	IR	11709584:11709931-11709931:11710022-11710022:11710131	11709584:11710131	0.281	0.1074	1	0.445
BLCA	TCGA-XF-A9T8-01A-11R-A39I-07.949b3248-f078-43cc-b6d8-39e9eabf88f1.aligned	1	intron_retention_8113	FBXO2	ENSG00000116661.9	chr1 | -	IR	11709584:11709931-11709931:11710022-11710022:11710131	11709584:11710131	0.281	0.1074	1	0.445
BLCA	TCGA-XF-AAME-01A-12R-A42T-07.8c50bd9a-1849-4466-aab6-da20488610f9.aligned		intron_retention_8113	FBXO2	ENSG00000116661.9	chr1 | -	IR	11709584:11709931-11709931:11710022-11710022:11710131	11709584:11710131	0.281	0.1074	1	0.445
BLCA	TCGA-XF-AAMG-01A-11R-A42T-07.e204f212-b8ad-47d1-ab9c-179b7389e47e.aligned		intron_retention_8113	FBXO2	ENSG00000116661.9	chr1 | -	IR	11709584:11709931-11709931:11710022-11710022:11710131	11709584:11710131	0.281	0.1074	1	0.445
BLCA	TCGA-XF-AAMH-01A-11R-A42T-07.4cdcbbae-5859-414b-bc81-001b25a3d4f1.aligned	1	intron_retention_8113	FBXO2	ENSG00000116661.9	chr1 | -	IR	11709584:11709931-11709931:11710022-11710022:11710131	11709584:11710131	0.281	0.1074	1	0.445
BLCA	TCGA-XF-AAMJ-01A-11R-A42T-07.c3919da2-0345-4374-940a-89fc70b7f393.aligned		intron_retention_8113	FBXO2	ENSG00000116661.9	chr1 | -	IR	11709584:11709931-11709931:11710022-11710022:11710131	11709584:11710131	0.281	0.1074	1	0.445
BLCA	TCGA-XF-AAML-01A-11R-A42T-07.fbca79e2-8904-4bdf-aede-b2049cb81302.aligned		intron_retention_8113	FBXO2	ENSG00000116661.9	chr1 | -	IR	11709584:11709931-11709931:11710022-11710022:11710131	11709584:11710131	0.281	0.1074	1	0.445
BLCA	TCGA-XF-AAMQ-01A-11R-A42T-07.ab8a3b08-8687-42c2-9c03-ae6691e8a183.aligned		intron_retention_8113	FBXO2	ENSG00000116661.9	chr1 | -	IR	11709584:11709931-11709931:11710022-11710022:11710131	11709584:11710131	0.281	0.1074	1	0.445
BLCA	TCGA-XF-AAMR-01A-31R-A42T-07.19823203-33ed-4c89-a8af-611ad1e95f8a.aligned	1	intron_retention_8113	FBXO2	ENSG00000116661.9	chr1 | -	IR	11709584:11709931-11709931:11710022-11710022:11710131	11709584:11710131	0.281	0.1074	1	0.445
BLCA	TCGA-XF-AAMT-01A-11R-A42T-07.72dcc6a3-c2ce-4e24-897d-880a0f01c1aa.aligned	1	intron_retention_8113	FBXO2	ENSG00000116661.9	chr1 | -	IR	11709584:11709931-11709931:11710022-11710022:11710131	11709584:11710131	0.281	0.1074	1	0.445
BLCA	TCGA-XF-AAMW-01A-11R-A42T-07.74bb1ce2-532c-4667-9650-765e25c26724.aligned	1	intron_retention_8113	FBXO2	ENSG00000116661.9	chr1 | -	IR	11709584:11709931-11709931:11710022-11710022:11710131	11709584:11710131	0.281	0.1074	1	0.445
BLCA	TCGA-XF-AAMX-01A-11R-A42T-07.f40bfbec-9e14-4f28-a4d5-5aa06e90a4bb.aligned	1	intron_retention_8113	FBXO2	ENSG00000116661.9	chr1 | -	IR	11709584:11709931-11709931:11710022-11710022:11710131	11709584:11710131	0.281	0.1074	1	0.445
BLCA	TCGA-XF-AAMY-01A-11R-A42T-07.97d81888-4ec1-438c-bbc3-1d10216e7606.aligned		intron_retention_8113	FBXO2	ENSG00000116661.9	chr1 | -	IR	11709584:11709931-11709931:11710022-11710022:11710131	11709584:11710131	0.281	0.1074	1	0.445
BLCA	TCGA-XF-AAMZ-01A-11R-A42T-07.ccc9fcec-f07a-498b-9389-9c2b3aa0d2bf.aligned		intron_retention_8113	FBXO2	ENSG00000116661.9	chr1 | -	IR	11709584:11709931-11709931:11710022-11710022:11710131	11709584:11710131	0.281	0.1074	1	0.445
BLCA	TCGA-XF-AAN0-01A-11R-A42T-07.ec11833d-476a-442e-82c6-f924bea495c1.aligned		intron_retention_8113	FBXO2	ENSG00000116661.9	chr1 | -	IR	11709584:11709931-11709931:11710022-11710022:11710131	11709584:11710131	0.281	0.1074	1	0.445
BLCA	TCGA-XF-AAN1-01A-31R-A42T-07.4f40609b-40ad-44f2-9185-a4c99056c48e.aligned		intron_retention_8113	FBXO2	ENSG00000116661.9	chr1 | -	IR	11709584:11709931-11709931:11710022-11710022:11710131	11709584:11710131	0.281	0.1074	1	0.445
BLCA	TCGA-XF-AAN2-01A-11R-A42T-07.b1af0c13-8e8b-456f-9e4c-c8c22d8ac37f.aligned		intron_retention_8113	FBXO2	ENSG00000116661.9	chr1 | -	IR	11709584:11709931-11709931:11710022-11710022:11710131	11709584:11710131	0.281	0.1074	1	0.445
BLCA	TCGA-XF-AAN3-01A-11R-A42T-07.ed035849-50d7-4ce5-93fd-88a7735a8c92.aligned		intron_retention_8113	FBXO2	ENSG00000116661.9	chr1 | -	IR	11709584:11709931-11709931:11710022-11710022:11710131	11709584:11710131	0.281	0.1074	1	0.445
BLCA	TCGA-XF-AAN4-01A-11R-A42T-07.60b688ac-61c5-4407-82e4-545cb869dca4.aligned		intron_retention_8113	FBXO2	ENSG00000116661.9	chr1 | -	IR	11709584:11709931-11709931:11710022-11710022:11710131	11709584:11710131	0.281	0.1074	1	0.445
BLCA	TCGA-XF-AAN5-01A-11R-A42T-07.e1adc304-07de-493e-a800-50fc1ab65b30.aligned		intron_retention_8113	FBXO2	ENSG00000116661.9	chr1 | -	IR	11709584:11709931-11709931:11710022-11710022:11710131	11709584:11710131	0.281	0.1074	1	0.445
BLCA	TCGA-XF-AAN7-01A-11R-A42T-07.9e523e29-ea79-4124-97b4-d9c8686b3ddc.aligned		intron_retention_8113	FBXO2	ENSG00000116661.9	chr1 | -	IR	11709584:11709931-11709931:11710022-11710022:11710131	11709584:11710131	0.281	0.1074	1	0.445
BLCA	TCGA-XF-AAN8-01A-11R-A42T-07.6d466393-6b0c-4624-b385-5d689695de6b.aligned		intron_retention_8113	FBXO2	ENSG00000116661.9	chr1 | -	IR	11709584:11709931-11709931:11710022-11710022:11710131	11709584:11710131	0.281	0.1074	1	0.445
BLCA	TCGA-YC-A89H-01A-11R-A36F-07.347ce226-e621-4492-a821-c990b5ef4ff3.aligned		intron_retention_8113	FBXO2	ENSG00000116661.9	chr1 | -	IR	11709584:11709931-11709931:11710022-11710022:11710131	11709584:11710131	0.281	0.1074	1	0.445
BLCA	TCGA-YC-A8S6-01A-31R-A38B-07.a2b8a4b8-202d-4705-89ab-5ac06028d7b0.aligned		intron_retention_8113	FBXO2	ENSG00000116661.9	chr1 | -	IR	11709584:11709931-11709931:11710022-11710022:11710131	11709584:11710131	0.281	0.1074	1	0.445
BLCA	TCGA-YC-A9TC-01A-22R-A39I-07.86fcf82f-c97c-4f01-998d-8e6f389438d5.aligned	1	intron_retention_8113	FBXO2	ENSG00000116661.9	chr1 | -	IR	11709584:11709931-11709931:11710022-11710022:11710131	11709584:11710131	0.281	0.1074	1	0.445
BLCA	TCGA-YF-AA3M-01A-11R-A42T-07.6f9d42b2-dcbf-440a-9d11-1a434f202227.aligned		intron_retention_8113	FBXO2	ENSG00000116661.9	chr1 | -	IR	11709584:11709931-11709931:11710022-11710022:11710131	11709584:11710131	0.281	0.1074	1	0.445
BLCA	TCGA-ZF-A9R0-01A-11R-A38B-07.d3eb9aa5-5e03-4c8d-88be-461184059d53.aligned		intron_retention_8113	FBXO2	ENSG00000116661.9	chr1 | -	IR	11709584:11709931-11709931:11710022-11710022:11710131	11709584:11710131	0.281	0.1074	1	0.445
BLCA	TCGA-ZF-A9R1-01A-11R-A39I-07.c720ac3f-9cb8-4a5c-aa7a-0fb852e11360.aligned		intron_retention_8113	FBXO2	ENSG00000116661.9	chr1 | -	IR	11709584:11709931-11709931:11710022-11710022:11710131	11709584:11710131	0.281	0.1074	1	0.445
BLCA	TCGA-ZF-A9R2-01A-11R-A39I-07.f29aacd1-503d-4f56-8faa-2ba309ce4f23.aligned		intron_retention_8113	FBXO2	ENSG00000116661.9	chr1 | -	IR	11709584:11709931-11709931:11710022-11710022:11710131	11709584:11710131	0.281	0.1074	1	0.445
BLCA	TCGA-ZF-A9R3-01A-11R-A38B-07.a5a9f82f-f3f4-47dc-9dcd-6b65c1c73a37.aligned	1	intron_retention_8113	FBXO2	ENSG00000116661.9	chr1 | -	IR	11709584:11709931-11709931:11710022-11710022:11710131	11709584:11710131	0.281	0.1074	1	0.445
BLCA	TCGA-ZF-A9R4-01A-11R-A38B-07.530bf880-039e-490c-8a9d-a27bc9b3d918.aligned		intron_retention_8113	FBXO2	ENSG00000116661.9	chr1 | -	IR	11709584:11709931-11709931:11710022-11710022:11710131	11709584:11710131	0.281	0.1074	1	0.445
BLCA	TCGA-ZF-A9R5-01A-12R-A42T-07.9e99dced-8649-4a7e-bba9-ccde95cc4045.aligned	0.778	intron_retention_8113	FBXO2	ENSG00000116661.9	chr1 | -	IR	11709584:11709931-11709931:11710022-11710022:11710131	11709584:11710131	0.281	0.1074	1	0.445
BLCA	TCGA-ZF-A9R7-01A-11R-A38B-07.9e1c37bb-1c94-4a98-8e44-e03953aa8ad9.aligned	1	intron_retention_8113	FBXO2	ENSG00000116661.9	chr1 | -	IR	11709584:11709931-11709931:11710022-11710022:11710131	11709584:11710131	0.281	0.1074	1	0.445
BLCA	TCGA-ZF-A9R9-01A-11R-A38B-07.d328ae95-7792-4953-a88a-f288a96c4a65.aligned		intron_retention_8113	FBXO2	ENSG00000116661.9	chr1 | -	IR	11709584:11709931-11709931:11710022-11710022:11710131	11709584:11710131	0.281	0.1074	1	0.445
BLCA	TCGA-ZF-A9RC-01A-11R-A38B-07.73e05f0f-01df-484e-94f5-b0586480f000.aligned	1	intron_retention_8113	FBXO2	ENSG00000116661.9	chr1 | -	IR	11709584:11709931-11709931:11710022-11710022:11710131	11709584:11710131	0.281	0.1074	1	0.445
BLCA	TCGA-ZF-A9RD-01A-11R-A42T-07.4333b9aa-34fb-429f-b622-6ab259f12367.aligned	1	intron_retention_8113	FBXO2	ENSG00000116661.9	chr1 | -	IR	11709584:11709931-11709931:11710022-11710022:11710131	11709584:11710131	0.281	0.1074	1	0.445
BLCA	TCGA-ZF-A9RE-01A-11R-A38B-07.2c9b61fa-9d26-41fe-9d79-a34bd08182f1.aligned		intron_retention_8113	FBXO2	ENSG00000116661.9	chr1 | -	IR	11709584:11709931-11709931:11710022-11710022:11710131	11709584:11710131	0.281	0.1074	1	0.445
BLCA	TCGA-ZF-A9RF-01A-11R-A38B-07.56907638-5828-4ad8-9be9-a6cf5aa90f7b.aligned	1	intron_retention_8113	FBXO2	ENSG00000116661.9	chr1 | -	IR	11709584:11709931-11709931:11710022-11710022:11710131	11709584:11710131	0.281	0.1074	1	0.445
BLCA	TCGA-ZF-A9RL-01A-11R-A38B-07.e15e8747-ff36-464a-bfc1-2909a23bd0a3.aligned		intron_retention_8113	FBXO2	ENSG00000116661.9	chr1 | -	IR	11709584:11709931-11709931:11710022-11710022:11710131	11709584:11710131	0.281	0.1074	1	0.445
BLCA	TCGA-ZF-A9RM-01A-11R-A38B-07.bd7c10f2-12d7-4405-a3bc-0809237dcb85.aligned		intron_retention_8113	FBXO2	ENSG00000116661.9	chr1 | -	IR	11709584:11709931-11709931:11710022-11710022:11710131	11709584:11710131	0.281	0.1074	1	0.445
BLCA	TCGA-ZF-A9RN-01A-11R-A42T-07.debf57c3-f5e0-418a-ad1c-40a8ccc93692.aligned	1	intron_retention_8113	FBXO2	ENSG00000116661.9	chr1 | -	IR	11709584:11709931-11709931:11710022-11710022:11710131	11709584:11710131	0.281	0.1074	1	0.445
BLCA	TCGA-ZF-AA4N-01A-11R-A38B-07.8baefcdb-0b95-4f4a-a7ba-3ee75c227bd1.aligned		intron_retention_8113	FBXO2	ENSG00000116661.9	chr1 | -	IR	11709584:11709931-11709931:11710022-11710022:11710131	11709584:11710131	0.281	0.1074	1	0.445
BLCA	TCGA-ZF-AA4R-01A-11R-A38B-07.d4ba2875-9bea-46eb-8279-72975c812701.aligned		intron_retention_8113	FBXO2	ENSG00000116661.9	chr1 | -	IR	11709584:11709931-11709931:11710022-11710022:11710131	11709584:11710131	0.281	0.1074	1	0.445
BLCA	TCGA-ZF-AA4T-01A-11R-A38B-07.7897b96a-99f9-4db8-abda-04caa8059896.aligned		intron_retention_8113	FBXO2	ENSG00000116661.9	chr1 | -	IR	11709584:11709931-11709931:11710022-11710022:11710131	11709584:11710131	0.281	0.1074	1	0.445
BLCA	TCGA-ZF-AA4U-01A-11R-A38B-07.842be247-70f7-4ac6-9e16-c07a1f62ff78.aligned	1	intron_retention_8113	FBXO2	ENSG00000116661.9	chr1 | -	IR	11709584:11709931-11709931:11710022-11710022:11710131	11709584:11710131	0.281	0.1074	1	0.445
BLCA	TCGA-ZF-AA4V-01A-11R-A38B-07.1ff7160a-3918-4942-8a87-9b78d2306c2e.aligned		intron_retention_8113	FBXO2	ENSG00000116661.9	chr1 | -	IR	11709584:11709931-11709931:11710022-11710022:11710131	11709584:11710131	0.281	0.1074	1	0.445
BLCA	TCGA-ZF-AA4W-01A-12R-A38B-07.c8d6dc3d-024b-4b68-9395-c3c2c38e8bb2.aligned	0.665	intron_retention_8113	FBXO2	ENSG00000116661.9	chr1 | -	IR	11709584:11709931-11709931:11710022-11710022:11710131	11709584:11710131	0.281	0.1074	1	0.445
BLCA	TCGA-ZF-AA4X-01A-11R-A38B-07.1dac1d16-2bc6-44db-b05a-30e8f2fb703f.aligned		intron_retention_8113	FBXO2	ENSG00000116661.9	chr1 | -	IR	11709584:11709931-11709931:11710022-11710022:11710131	11709584:11710131	0.281	0.1074	1	0.445
BLCA	TCGA-ZF-AA51-01A-21R-A39I-07.1be3a1d1-1300-4d9f-86d1-4b5faf7241fb.aligned	0.63	intron_retention_8113	FBXO2	ENSG00000116661.9	chr1 | -	IR	11709584:11709931-11709931:11710022-11710022:11710131	11709584:11710131	0.281	0.1074	1	0.445
BLCA	TCGA-ZF-AA53-01A-11R-A39I-07.97d051a1-0b25-45eb-a9ac-c2006d89752e.aligned	1	intron_retention_8113	FBXO2	ENSG00000116661.9	chr1 | -	IR	11709584:11709931-11709931:11710022-11710022:11710131	11709584:11710131	0.281	0.1074	1	0.445
BLCA	TCGA-ZF-AA54-01A-11R-A39I-07.b7db14a4-5268-44e5-aed1-7200c6c82a2d.aligned		intron_retention_8113	FBXO2	ENSG00000116661.9	chr1 | -	IR	11709584:11709931-11709931:11710022-11710022:11710131	11709584:11710131	0.281	0.1074	1	0.445
BLCA	TCGA-ZF-AA56-01A-31R-A39I-07.5cfa74de-919c-4c0a-9f17-d609268723d6.aligned		intron_retention_8113	FBXO2	ENSG00000116661.9	chr1 | -	IR	11709584:11709931-11709931:11710022-11710022:11710131	11709584:11710131	0.281	0.1074	1	0.445
BLCA	TCGA-ZF-AA58-01A-12R-A42T-07.563f3a26-7e97-41ff-a52c-48ba484e3a39.aligned		intron_retention_8113	FBXO2	ENSG00000116661.9	chr1 | -	IR	11709584:11709931-11709931:11710022-11710022:11710131	11709584:11710131	0.281	0.1074	1	0.445
BLCA	TCGA-ZF-AA5H-01A-11R-A39I-07.183e007a-dd95-4907-a19f-410a2da7f39b.aligned	1	intron_retention_8113	FBXO2	ENSG00000116661.9	chr1 | -	IR	11709584:11709931-11709931:11710022-11710022:11710131	11709584:11710131	0.281	0.1074	1	0.445
BLCA	TCGA-ZF-AA5N-01A-11R-A42T-07.283dae7a-c249-4f56-b8ae-e9a13e451269.aligned		intron_retention_8113	FBXO2	ENSG00000116661.9	chr1 | -	IR	11709584:11709931-11709931:11710022-11710022:11710131	11709584:11710131	0.281	0.1074	1	0.445
BLCA	TCGA-ZF-AA5P-01A-11R-A39I-07.8612349c-596c-4938-92c8-79b8919f5bd6.aligned		intron_retention_8113	FBXO2	ENSG00000116661.9	chr1 | -	IR	11709584:11709931-11709931:11710022-11710022:11710131	11709584:11710131	0.281	0.1074	1	0.445
ESCA	TCGA-2H-A9GF-01A-11R-A37I-31.2666431c-515b-4088-a448-baf7c52106d8.aligned		intron_retention_8113	FBXO2	ENSG00000116661.9	chr1 | -	IR	11709584:11709931-11709931:11710022-11710022:11710131	11709584:11710131	0.481	0.0904	1	0.305
ESCA	TCGA-2H-A9GH-01A-11R-A37I-31.775bb1a6-0463-4e78-bc3f-596e3a5eb38f.aligned		intron_retention_8113	FBXO2	ENSG00000116661.9	chr1 | -	IR	11709584:11709931-11709931:11710022-11710022:11710131	11709584:11710131	0.481	0.0904	1	0.305
ESCA	TCGA-2H-A9GI-01A-11R-A37I-31.3e9a405f-cb27-4773-b501-57a2eaf833d4.aligned	0.749	intron_retention_8113	FBXO2	ENSG00000116661.9	chr1 | -	IR	11709584:11709931-11709931:11710022-11710022:11710131	11709584:11710131	0.481	0.0904	1	0.305
ESCA	TCGA-2H-A9GJ-01A-11R-A37I-31.67bda296-5e65-45a9-962e-a99f51a12e14.aligned	0.789	intron_retention_8113	FBXO2	ENSG00000116661.9	chr1 | -	IR	11709584:11709931-11709931:11710022-11710022:11710131	11709584:11710131	0.481	0.0904	1	0.305
ESCA	TCGA-2H-A9GK-01A-11R-A37I-31.fd1ad4dc-ff32-48df-bed7-45fd742418e9.aligned		intron_retention_8113	FBXO2	ENSG00000116661.9	chr1 | -	IR	11709584:11709931-11709931:11710022-11710022:11710131	11709584:11710131	0.481	0.0904	1	0.305
ESCA	TCGA-2H-A9GL-01A-12R-A37I-31.9b3adc67-cc9c-48db-96d4-2314368986e2.aligned		intron_retention_8113	FBXO2	ENSG00000116661.9	chr1 | -	IR	11709584:11709931-11709931:11710022-11710022:11710131	11709584:11710131	0.481	0.0904	1	0.305
ESCA	TCGA-2H-A9GM-01A-11R-A37I-31.7b4fe474-b28b-466b-9985-8c34ef90fccf.aligned		intron_retention_8113	FBXO2	ENSG00000116661.9	chr1 | -	IR	11709584:11709931-11709931:11710022-11710022:11710131	11709584:11710131	0.481	0.0904	1	0.305
ESCA	TCGA-2H-A9GN-01A-11R-A37I-31.3b88034b-950d-4fd1-ae98-2cd37342bbf4.aligned	1	intron_retention_8113	FBXO2	ENSG00000116661.9	chr1 | -	IR	11709584:11709931-11709931:11710022-11710022:11710131	11709584:11710131	0.481	0.0904	1	0.305
ESCA	TCGA-2H-A9GO-01A-11R-A37I-31.b4ab4edc-6163-4211-80c2-12d8bbbd8a2a.aligned	0.762	intron_retention_8113	FBXO2	ENSG00000116661.9	chr1 | -	IR	11709584:11709931-11709931:11710022-11710022:11710131	11709584:11710131	0.481	0.0904	1	0.305
ESCA	TCGA-2H-A9GQ-01A-11R-A37I-31.d7dd93e6-94d6-44b0-bbfd-a73c9b0de465.aligned	1	intron_retention_8113	FBXO2	ENSG00000116661.9	chr1 | -	IR	11709584:11709931-11709931:11710022-11710022:11710131	11709584:11710131	0.481	0.0904	1	0.305
ESCA	TCGA-2H-A9GR-01A-12R-A37I-31.b25f3025-5f28-4be1-8003-078d1c041bf7.aligned		intron_retention_8113	FBXO2	ENSG00000116661.9	chr1 | -	IR	11709584:11709931-11709931:11710022-11710022:11710131	11709584:11710131	0.481	0.0904	1	0.305
ESCA	TCGA-IC-A6RE-01A-11R-A336-31.bb3f3e0f-08f2-4eaf-81f7-93ca753b42bf.aligned	1	intron_retention_8113	FBXO2	ENSG00000116661.9	chr1 | -	IR	11709584:11709931-11709931:11710022-11710022:11710131	11709584:11710131	0.481	0.0904	1	0.305
ESCA	TCGA-IC-A6RE-11A-12R-A336-31.6e85cbe2-f41b-45fc-8ebb-f9024e465c9c.aligned		intron_retention_8113	FBXO2	ENSG00000116661.9	chr1 | -	IR	11709584:11709931-11709931:11710022-11710022:11710131	11709584:11710131	0.481	0.0904	1	0.305
ESCA	TCGA-IC-A6RF-01A-13R-A336-31.6ab7dfd7-56d4-4d04-b7f7-08b2163494a6.aligned	1	intron_retention_8113	FBXO2	ENSG00000116661.9	chr1 | -	IR	11709584:11709931-11709931:11710022-11710022:11710131	11709584:11710131	0.481	0.0904	1	0.305
ESCA	TCGA-IC-A6RF-11A-21R-A336-31.eafcec1d-5509-4541-8e20-eab000496fa7.aligned		intron_retention_8113	FBXO2	ENSG00000116661.9	chr1 | -	IR	11709584:11709931-11709931:11710022-11710022:11710131	11709584:11710131	0.481	0.0904	1	0.305
ESCA	TCGA-IG-A3I8-01A-11R-A24K-31.fd4ff8b7-2b34-4947-80bc-3e5feccf30b3.aligned		intron_retention_8113	FBXO2	ENSG00000116661.9	chr1 | -	IR	11709584:11709931-11709931:11710022-11710022:11710131	11709584:11710131	0.481	0.0904	1	0.305
ESCA	TCGA-IG-A3QL-01A-11R-A24K-31.35db6527-ec8a-4b0c-b296-81ee1340f3d4.aligned		intron_retention_8113	FBXO2	ENSG00000116661.9	chr1 | -	IR	11709584:11709931-11709931:11710022-11710022:11710131	11709584:11710131	0.481	0.0904	1	0.305
ESCA	TCGA-IG-A3YA-01A-11R-A24K-31.5e5924f8-0336-488e-ab62-356cf9bcc553.aligned		intron_retention_8113	FBXO2	ENSG00000116661.9	chr1 | -	IR	11709584:11709931-11709931:11710022-11710022:11710131	11709584:11710131	0.481	0.0904	1	0.305
ESCA	TCGA-IG-A3YB-01A-11R-A36D-31.70092809-ec16-413c-85b4-d9f58359fe32.aligned	0.832	intron_retention_8113	FBXO2	ENSG00000116661.9	chr1 | -	IR	11709584:11709931-11709931:11710022-11710022:11710131	11709584:11710131	0.481	0.0904	1	0.305
ESCA	TCGA-IG-A3YC-01A-11R-A24K-31.03cad6ec-004b-4b3c-a165-a7e8860fb82e.aligned	1	intron_retention_8113	FBXO2	ENSG00000116661.9	chr1 | -	IR	11709584:11709931-11709931:11710022-11710022:11710131	11709584:11710131	0.481	0.0904	1	0.305
ESCA	TCGA-IG-A4P3-01A-11R-A260-31.cae6c3b5-a4f3-4d45-9d53-9c7c2c735c32.aligned	1	intron_retention_8113	FBXO2	ENSG00000116661.9	chr1 | -	IR	11709584:11709931-11709931:11710022-11710022:11710131	11709584:11710131	0.481	0.0904	1	0.305
ESCA	TCGA-IG-A4QS-01A-11R-A260-31.8f13389e-3d3b-423f-8a78-0eb9c2373d06.aligned	1	intron_retention_8113	FBXO2	ENSG00000116661.9	chr1 | -	IR	11709584:11709931-11709931:11710022-11710022:11710131	11709584:11710131	0.481	0.0904	1	0.305
ESCA	TCGA-IG-A50L-01A-11R-A260-31.54d09e0c-b5f0-4b0d-98eb-200b29a6458e.aligned		intron_retention_8113	FBXO2	ENSG00000116661.9	chr1 | -	IR	11709584:11709931-11709931:11710022-11710022:11710131	11709584:11710131	0.481	0.0904	1	0.305
ESCA	TCGA-IG-A51D-01A-11R-A36D-31.2235d68c-75ea-47f2-a3c5-9e9cff416d22.aligned	1	intron_retention_8113	FBXO2	ENSG00000116661.9	chr1 | -	IR	11709584:11709931-11709931:11710022-11710022:11710131	11709584:11710131	0.481	0.0904	1	0.305
ESCA	TCGA-IG-A5B8-01A-11R-A28J-31.e336a116-9848-4632-b3b2-2e600f06a7c4.aligned	0.852	intron_retention_8113	FBXO2	ENSG00000116661.9	chr1 | -	IR	11709584:11709931-11709931:11710022-11710022:11710131	11709584:11710131	0.481	0.0904	1	0.305
ESCA	TCGA-IG-A5S3-01A-11R-A28J-31.c5d79cf3-46cb-4869-ab18-b9c052d8c279.aligned	1	intron_retention_8113	FBXO2	ENSG00000116661.9	chr1 | -	IR	11709584:11709931-11709931:11710022-11710022:11710131	11709584:11710131	0.481	0.0904	1	0.305
ESCA	TCGA-IG-A625-01A-11R-A31P-31.3e623ddd-6fce-43e6-9d28-edf725d0d10e.aligned		intron_retention_8113	FBXO2	ENSG00000116661.9	chr1 | -	IR	11709584:11709931-11709931:11710022-11710022:11710131	11709584:11710131	0.481	0.0904	1	0.305
ESCA	TCGA-IG-A6QS-01A-12R-A336-31.d4dc886f-538b-436c-9c8a-3c2728e9ef3f.aligned		intron_retention_8113	FBXO2	ENSG00000116661.9	chr1 | -	IR	11709584:11709931-11709931:11710022-11710022:11710131	11709584:11710131	0.481	0.0904	1	0.305
ESCA	TCGA-IG-A7DP-01A-31R-A336-31.3c1eadbc-7a4c-4009-95b4-5125847528b4.aligned		intron_retention_8113	FBXO2	ENSG00000116661.9	chr1 | -	IR	11709584:11709931-11709931:11710022-11710022:11710131	11709584:11710131	0.481	0.0904	1	0.305
ESCA	TCGA-IG-A8O2-01A-11R-A36D-31.47884f1b-a77d-46ac-8ce8-f6feb7290357.aligned		intron_retention_8113	FBXO2	ENSG00000116661.9	chr1 | -	IR	11709584:11709931-11709931:11710022-11710022:11710131	11709584:11710131	0.481	0.0904	1	0.305
ESCA	TCGA-IG-A97H-01A-11R-A38D-31.55a1b1e4-d4d3-4aaa-8058-605703ca3da9.aligned	1	intron_retention_8113	FBXO2	ENSG00000116661.9	chr1 | -	IR	11709584:11709931-11709931:11710022-11710022:11710131	11709584:11710131	0.481	0.0904	1	0.305
ESCA	TCGA-IG-A97I-01A-11R-A38D-31.6b822657-38b7-4cb4-9594-e7cefa0bf66d.aligned	1	intron_retention_8113	FBXO2	ENSG00000116661.9	chr1 | -	IR	11709584:11709931-11709931:11710022-11710022:11710131	11709584:11710131	0.481	0.0904	1	0.305
ESCA	TCGA-JY-A6FA-01A-11R-A336-31.3808b443-cfdf-4655-b39c-2c036ba1b11f.aligned		intron_retention_8113	FBXO2	ENSG00000116661.9	chr1 | -	IR	11709584:11709931-11709931:11710022-11710022:11710131	11709584:11710131	0.481	0.0904	1	0.305
ESCA	TCGA-JY-A6FB-01A-11R-A336-31.8d95696a-96f3-4c24-b246-63e623465a99.aligned	0.716	intron_retention_8113	FBXO2	ENSG00000116661.9	chr1 | -	IR	11709584:11709931-11709931:11710022-11710022:11710131	11709584:11710131	0.481	0.0904	1	0.305
ESCA	TCGA-JY-A6FD-01A-11R-A336-31.acbeed42-567d-442b-8dde-e6b2ac30002c.aligned	1	intron_retention_8113	FBXO2	ENSG00000116661.9	chr1 | -	IR	11709584:11709931-11709931:11710022-11710022:11710131	11709584:11710131	0.481	0.0904	1	0.305
ESCA	TCGA-JY-A6FE-01A-11R-A336-31.eabb70d8-8eab-4a19-a693-0b46f0c44bee.aligned		intron_retention_8113	FBXO2	ENSG00000116661.9	chr1 | -	IR	11709584:11709931-11709931:11710022-11710022:11710131	11709584:11710131	0.481	0.0904	1	0.305
ESCA	TCGA-JY-A6FG-01A-11R-A336-31.0c615c32-fc4c-44f0-ac26-494a8c444532.aligned		intron_retention_8113	FBXO2	ENSG00000116661.9	chr1 | -	IR	11709584:11709931-11709931:11710022-11710022:11710131	11709584:11710131	0.481	0.0904	1	0.305
ESCA	TCGA-JY-A6FH-01A-11R-A336-31.44e66c79-a769-4003-855b-2efddb00b9fe.aligned	1	intron_retention_8113	FBXO2	ENSG00000116661.9	chr1 | -	IR	11709584:11709931-11709931:11710022-11710022:11710131	11709584:11710131	0.481	0.0904	1	0.305
ESCA	TCGA-JY-A938-01A-11R-A37I-31.7fcd511d-aa16-4ace-94e4-9154160165c2.aligned	0.84	intron_retention_8113	FBXO2	ENSG00000116661.9	chr1 | -	IR	11709584:11709931-11709931:11710022-11710022:11710131	11709584:11710131	0.481	0.0904	1	0.305
ESCA	TCGA-JY-A939-01A-12R-A37I-31.554c6fc5-20ee-4826-8d62-16e57ab45652.aligned		intron_retention_8113	FBXO2	ENSG00000116661.9	chr1 | -	IR	11709584:11709931-11709931:11710022-11710022:11710131	11709584:11710131	0.481	0.0904	1	0.305
ESCA	TCGA-JY-A93C-01A-11R-A38D-31.bcb6dc43-00d6-4f52-a369-445fdd18ecac.aligned		intron_retention_8113	FBXO2	ENSG00000116661.9	chr1 | -	IR	11709584:11709931-11709931:11710022-11710022:11710131	11709584:11710131	0.481	0.0904	1	0.305
ESCA	TCGA-JY-A93D-01A-11R-A38D-31.71182e37-fcb0-4c02-be00-fe76d64cdb6b.aligned	1	intron_retention_8113	FBXO2	ENSG00000116661.9	chr1 | -	IR	11709584:11709931-11709931:11710022-11710022:11710131	11709584:11710131	0.481	0.0904	1	0.305
ESCA	TCGA-JY-A93F-01A-21R-A37I-31.1237b3e0-eb4e-4d93-9bf2-b083d8332e00.aligned		intron_retention_8113	FBXO2	ENSG00000116661.9	chr1 | -	IR	11709584:11709931-11709931:11710022-11710022:11710131	11709584:11710131	0.481	0.0904	1	0.305
ESCA	TCGA-KH-A6WC-01A-11R-A336-31.145a7c8f-fece-480a-b139-9ca7ff209b78.aligned		intron_retention_8113	FBXO2	ENSG00000116661.9	chr1 | -	IR	11709584:11709931-11709931:11710022-11710022:11710131	11709584:11710131	0.481	0.0904	1	0.305
ESCA	TCGA-L5-A43C-01A-11R-A24K-31.d7af3e6f-9a4b-417d-b97a-9090b8ee94cf.aligned		intron_retention_8113	FBXO2	ENSG00000116661.9	chr1 | -	IR	11709584:11709931-11709931:11710022-11710022:11710131	11709584:11710131	0.481	0.0904	1	0.305
ESCA	TCGA-L5-A43C-11A-11R-A24K-31.cdcfe8e4-527c-4c6a-8f3a-6679a0441bdb.aligned		intron_retention_8113	FBXO2	ENSG00000116661.9	chr1 | -	IR	11709584:11709931-11709931:11710022-11710022:11710131	11709584:11710131	0.481	0.0904	1	0.305
ESCA	TCGA-L5-A43E-01A-11R-A24K-31.28616399-0b80-4f76-8b7f-8ec85982e3fa.aligned		intron_retention_8113	FBXO2	ENSG00000116661.9	chr1 | -	IR	11709584:11709931-11709931:11710022-11710022:11710131	11709584:11710131	0.481	0.0904	1	0.305
ESCA	TCGA-L5-A43J-01A-12R-A24K-31.ca401031-8917-4bf7-a323-354da8cbb349.aligned	1	intron_retention_8113	FBXO2	ENSG00000116661.9	chr1 | -	IR	11709584:11709931-11709931:11710022-11710022:11710131	11709584:11710131	0.481	0.0904	1	0.305
ESCA	TCGA-L5-A4OE-01A-11R-A260-31.be00827c-fd81-46a5-a9e8-6c28f0db250a.aligned		intron_retention_8113	FBXO2	ENSG00000116661.9	chr1 | -	IR	11709584:11709931-11709931:11710022-11710022:11710131	11709584:11710131	0.481	0.0904	1	0.305
ESCA	TCGA-L5-A4OF-11A-12R-A260-31.416efc20-e5b3-497f-9bd5-c8504c2d1886.aligned		intron_retention_8113	FBXO2	ENSG00000116661.9	chr1 | -	IR	11709584:11709931-11709931:11710022-11710022:11710131	11709584:11710131	0.481	0.0904	1	0.305
ESCA	TCGA-L5-A4OG-01A-11R-A260-31.b857a086-1804-46e8-8335-8663db929a32.aligned	0.842	intron_retention_8113	FBXO2	ENSG00000116661.9	chr1 | -	IR	11709584:11709931-11709931:11710022-11710022:11710131	11709584:11710131	0.481	0.0904	1	0.305
ESCA	TCGA-L5-A4OG-11A-12R-A260-31.52e9e41e-4cc2-4949-aede-b68a2d0822aa.aligned		intron_retention_8113	FBXO2	ENSG00000116661.9	chr1 | -	IR	11709584:11709931-11709931:11710022-11710022:11710131	11709584:11710131	0.481	0.0904	1	0.305
ESCA	TCGA-L5-A4OH-01A-11R-A260-31.f080eab0-e8a4-4bc9-9806-1580bc58a679.aligned	0.832	intron_retention_8113	FBXO2	ENSG00000116661.9	chr1 | -	IR	11709584:11709931-11709931:11710022-11710022:11710131	11709584:11710131	0.481	0.0904	1	0.305
ESCA	TCGA-L5-A4OI-01A-11R-A36D-31.df2c969f-190e-4697-aa69-4c5b2b0f7f2b.aligned	1	intron_retention_8113	FBXO2	ENSG00000116661.9	chr1 | -	IR	11709584:11709931-11709931:11710022-11710022:11710131	11709584:11710131	0.481	0.0904	1	0.305
ESCA	TCGA-L5-A4OJ-01A-11R-A260-31.ab6f7e9b-59ae-4053-a1cb-2acef360223a.aligned		intron_retention_8113	FBXO2	ENSG00000116661.9	chr1 | -	IR	11709584:11709931-11709931:11710022-11710022:11710131	11709584:11710131	0.481	0.0904	1	0.305
ESCA	TCGA-L5-A4OJ-11A-12R-A260-31.be430dee-ad40-4e96-883f-20eaadfa7e9e.aligned		intron_retention_8113	FBXO2	ENSG00000116661.9	chr1 | -	IR	11709584:11709931-11709931:11710022-11710022:11710131	11709584:11710131	0.481	0.0904	1	0.305
ESCA	TCGA-L5-A4OM-01A-11R-A260-31.6b604275-b899-4e92-a90a-af07700b0012.aligned		intron_retention_8113	FBXO2	ENSG00000116661.9	chr1 | -	IR	11709584:11709931-11709931:11710022-11710022:11710131	11709584:11710131	0.481	0.0904	1	0.305
ESCA	TCGA-L5-A4ON-01A-11R-A260-31.3b510f65-5290-4e7f-8067-a9f20c045308.aligned	1	intron_retention_8113	FBXO2	ENSG00000116661.9	chr1 | -	IR	11709584:11709931-11709931:11710022-11710022:11710131	11709584:11710131	0.481	0.0904	1	0.305
ESCA	TCGA-L5-A4OO-01A-11R-A260-31.0c798ab9-d08b-4eaf-b53a-54c8b369c61e.aligned	0.929	intron_retention_8113	FBXO2	ENSG00000116661.9	chr1 | -	IR	11709584:11709931-11709931:11710022-11710022:11710131	11709584:11710131	0.481	0.0904	1	0.305
ESCA	TCGA-L5-A4OO-11A-12R-A260-31.d97726a5-378b-4a63-b6ba-31834fbac023.aligned		intron_retention_8113	FBXO2	ENSG00000116661.9	chr1 | -	IR	11709584:11709931-11709931:11710022-11710022:11710131	11709584:11710131	0.481	0.0904	1	0.305
ESCA	TCGA-L5-A4OP-01A-11R-A260-31.c44d6230-d93a-4f46-b62b-5c2e1902f974.aligned	1	intron_retention_8113	FBXO2	ENSG00000116661.9	chr1 | -	IR	11709584:11709931-11709931:11710022-11710022:11710131	11709584:11710131	0.481	0.0904	1	0.305
ESCA	TCGA-L5-A4OQ-11A-12R-A260-31.6578cdec-4072-475a-b17e-4c4c40968b81.aligned	0.879	intron_retention_8113	FBXO2	ENSG00000116661.9	chr1 | -	IR	11709584:11709931-11709931:11710022-11710022:11710131	11709584:11710131	0.481	0.0904	1	0.305
ESCA	TCGA-L5-A4OR-11A-11R-A260-31.27645d9b-50ee-429f-8cd1-d6ba02dae646.aligned		intron_retention_8113	FBXO2	ENSG00000116661.9	chr1 | -	IR	11709584:11709931-11709931:11710022-11710022:11710131	11709584:11710131	0.481	0.0904	1	0.305
ESCA	TCGA-L5-A4OS-01A-11R-A28J-31.803e0fb4-943d-4ec5-a2e9-9ab8868b74cc.aligned	1	intron_retention_8113	FBXO2	ENSG00000116661.9	chr1 | -	IR	11709584:11709931-11709931:11710022-11710022:11710131	11709584:11710131	0.481	0.0904	1	0.305
ESCA	TCGA-L5-A4OT-01A-11R-A28J-31.b00a6bd5-85b4-4ad9-a0ed-c98cc4483c5c.aligned		intron_retention_8113	FBXO2	ENSG00000116661.9	chr1 | -	IR	11709584:11709931-11709931:11710022-11710022:11710131	11709584:11710131	0.481	0.0904	1	0.305
ESCA	TCGA-L5-A4OU-01A-11R-A28J-31.8e15f178-5503-40ed-9594-33c5a04d2f26.aligned		intron_retention_8113	FBXO2	ENSG00000116661.9	chr1 | -	IR	11709584:11709931-11709931:11710022-11710022:11710131	11709584:11710131	0.481	0.0904	1	0.305
ESCA	TCGA-L5-A4OW-01A-11R-A28J-31.292eea4b-1268-4b05-817d-ead63d73a038.aligned		intron_retention_8113	FBXO2	ENSG00000116661.9	chr1 | -	IR	11709584:11709931-11709931:11710022-11710022:11710131	11709584:11710131	0.481	0.0904	1	0.305
ESCA	TCGA-L5-A4OX-01A-21R-A28J-31.bfe01692-9c40-41fb-abd0-1420510c2917.aligned		intron_retention_8113	FBXO2	ENSG00000116661.9	chr1 | -	IR	11709584:11709931-11709931:11710022-11710022:11710131	11709584:11710131	0.481	0.0904	1	0.305
ESCA	TCGA-L5-A88S-01A-11R-A36D-31.d9aeba99-9f40-43f7-9f05-69a16c41d044.aligned	1	intron_retention_8113	FBXO2	ENSG00000116661.9	chr1 | -	IR	11709584:11709931-11709931:11710022-11710022:11710131	11709584:11710131	0.481	0.0904	1	0.305
ESCA	TCGA-L5-A88T-01A-11R-A354-31.31a6e0c8-ac13-44b1-b644-4c87b0a996cd.aligned		intron_retention_8113	FBXO2	ENSG00000116661.9	chr1 | -	IR	11709584:11709931-11709931:11710022-11710022:11710131	11709584:11710131	0.481	0.0904	1	0.305
ESCA	TCGA-L5-A88V-01A-11R-A354-31.8d2bbeb5-9e19-4b27-af93-8a437576d379.aligned		intron_retention_8113	FBXO2	ENSG00000116661.9	chr1 | -	IR	11709584:11709931-11709931:11710022-11710022:11710131	11709584:11710131	0.481	0.0904	1	0.305
ESCA	TCGA-L5-A88W-01A-11R-A354-31.23cf227e-18cb-45af-8273-b04f8f2c0b7b.aligned		intron_retention_8113	FBXO2	ENSG00000116661.9	chr1 | -	IR	11709584:11709931-11709931:11710022-11710022:11710131	11709584:11710131	0.481	0.0904	1	0.305
ESCA	TCGA-L5-A88Y-01A-11R-A354-31.533fc4a0-820e-4d46-9e51-c5ddfb63e590.aligned		intron_retention_8113	FBXO2	ENSG00000116661.9	chr1 | -	IR	11709584:11709931-11709931:11710022-11710022:11710131	11709584:11710131	0.481	0.0904	1	0.305
ESCA	TCGA-L5-A88Z-01A-11R-A36D-31.d42e7e92-aa95-4a61-98b6-1ad21b341887.aligned		intron_retention_8113	FBXO2	ENSG00000116661.9	chr1 | -	IR	11709584:11709931-11709931:11710022-11710022:11710131	11709584:11710131	0.481	0.0904	1	0.305
ESCA	TCGA-L5-A891-01A-11R-A36D-31.5d2d1309-913f-4d35-a27c-ad8b16677f30.aligned	1	intron_retention_8113	FBXO2	ENSG00000116661.9	chr1 | -	IR	11709584:11709931-11709931:11710022-11710022:11710131	11709584:11710131	0.481	0.0904	1	0.305
ESCA	TCGA-L5-A893-01A-11R-A36D-31.85888801-8f7f-4b69-b203-1a515555a5d7.aligned		intron_retention_8113	FBXO2	ENSG00000116661.9	chr1 | -	IR	11709584:11709931-11709931:11710022-11710022:11710131	11709584:11710131	0.481	0.0904	1	0.305
ESCA	TCGA-L5-A8NE-01A-11R-A37I-31.e3690f9a-3f38-4140-8613-5ab0893ad190.aligned	1	intron_retention_8113	FBXO2	ENSG00000116661.9	chr1 | -	IR	11709584:11709931-11709931:11710022-11710022:11710131	11709584:11710131	0.481	0.0904	1	0.305
ESCA	TCGA-L5-A8NF-01A-11R-A37I-31.aa73fecf-ae2c-47b6-aa39-863fd39a5995.aligned	1	intron_retention_8113	FBXO2	ENSG00000116661.9	chr1 | -	IR	11709584:11709931-11709931:11710022-11710022:11710131	11709584:11710131	0.481	0.0904	1	0.305
ESCA	TCGA-L5-A8NG-01A-11R-A37I-31.5f2df729-1d5f-400e-a200-13ec56d10aee.aligned	0.821	intron_retention_8113	FBXO2	ENSG00000116661.9	chr1 | -	IR	11709584:11709931-11709931:11710022-11710022:11710131	11709584:11710131	0.481	0.0904	1	0.305
ESCA	TCGA-L5-A8NH-01A-11R-A37I-31.f43178e9-176f-4c0b-b31e-44a6f485e02e.aligned		intron_retention_8113	FBXO2	ENSG00000116661.9	chr1 | -	IR	11709584:11709931-11709931:11710022-11710022:11710131	11709584:11710131	0.481	0.0904	1	0.305
ESCA	TCGA-L5-A8NI-01A-11R-A37I-31.86a7ec5c-c809-486f-8a1c-b8668c728b3e.aligned	1	intron_retention_8113	FBXO2	ENSG00000116661.9	chr1 | -	IR	11709584:11709931-11709931:11710022-11710022:11710131	11709584:11710131	0.481	0.0904	1	0.305
ESCA	TCGA-L5-A8NJ-01A-11R-A36D-31.ff23a07e-316b-426d-bab4-d340fb3a098c.aligned	1	intron_retention_8113	FBXO2	ENSG00000116661.9	chr1 | -	IR	11709584:11709931-11709931:11710022-11710022:11710131	11709584:11710131	0.481	0.0904	1	0.305
ESCA	TCGA-L5-A8NK-01A-21R-A37I-31.5c7efcdd-2676-486e-90e1-ba7bb588f461.aligned	1	intron_retention_8113	FBXO2	ENSG00000116661.9	chr1 | -	IR	11709584:11709931-11709931:11710022-11710022:11710131	11709584:11710131	0.481	0.0904	1	0.305
ESCA	TCGA-L5-A8NL-01A-12R-A37I-31.99e4d1c4-008b-4353-ae91-d5916a3e09e8.aligned	1	intron_retention_8113	FBXO2	ENSG00000116661.9	chr1 | -	IR	11709584:11709931-11709931:11710022-11710022:11710131	11709584:11710131	0.481	0.0904	1	0.305
ESCA	TCGA-L5-A8NM-01A-11R-A37I-31.0e4428f4-ba90-407d-a7b2-0fff6ca86c2e.aligned	1	intron_retention_8113	FBXO2	ENSG00000116661.9	chr1 | -	IR	11709584:11709931-11709931:11710022-11710022:11710131	11709584:11710131	0.481	0.0904	1	0.305
ESCA	TCGA-L5-A8NN-01A-11R-A37I-31.ee00684b-de13-4889-a667-9f0828aae9d1.aligned	0.872	intron_retention_8113	FBXO2	ENSG00000116661.9	chr1 | -	IR	11709584:11709931-11709931:11710022-11710022:11710131	11709584:11710131	0.481	0.0904	1	0.305
ESCA	TCGA-L5-A8NQ-01A-11R-A36D-31.afc54daf-cbfe-4706-9122-d7f874e1f4ae.aligned	0.695	intron_retention_8113	FBXO2	ENSG00000116661.9	chr1 | -	IR	11709584:11709931-11709931:11710022-11710022:11710131	11709584:11710131	0.481	0.0904	1	0.305
ESCA	TCGA-L5-A8NR-01A-11R-A37I-31.0c3fd9e2-4ed6-4e73-ae61-b6279eaab6e3.aligned	1	intron_retention_8113	FBXO2	ENSG00000116661.9	chr1 | -	IR	11709584:11709931-11709931:11710022-11710022:11710131	11709584:11710131	0.481	0.0904	1	0.305
ESCA	TCGA-L5-A8NS-01A-12R-A37I-31.40ace004-0894-4bff-be42-a86a7da9e543.aligned	1	intron_retention_8113	FBXO2	ENSG00000116661.9	chr1 | -	IR	11709584:11709931-11709931:11710022-11710022:11710131	11709584:11710131	0.481	0.0904	1	0.305
ESCA	TCGA-L5-A8NT-01A-11R-A37I-31.22cf7575-0a8b-4faa-9d12-c40c54e5ed0f.aligned		intron_retention_8113	FBXO2	ENSG00000116661.9	chr1 | -	IR	11709584:11709931-11709931:11710022-11710022:11710131	11709584:11710131	0.481	0.0904	1	0.305
ESCA	TCGA-L5-A8NU-01A-11R-A36D-31.fec8bd3a-1330-4864-894a-e9909210b395.aligned		intron_retention_8113	FBXO2	ENSG00000116661.9	chr1 | -	IR	11709584:11709931-11709931:11710022-11710022:11710131	11709584:11710131	0.481	0.0904	1	0.305
ESCA	TCGA-L5-A8NV-01A-11R-A37I-31.d77ac878-9306-499b-8dde-98af5a7d33e5.aligned	1	intron_retention_8113	FBXO2	ENSG00000116661.9	chr1 | -	IR	11709584:11709931-11709931:11710022-11710022:11710131	11709584:11710131	0.481	0.0904	1	0.305
ESCA	TCGA-L5-A8NW-01A-11R-A37I-31.d1af915a-614d-4e9e-ae89-0f4632f85386.aligned		intron_retention_8113	FBXO2	ENSG00000116661.9	chr1 | -	IR	11709584:11709931-11709931:11710022-11710022:11710131	11709584:11710131	0.481	0.0904	1	0.305
ESCA	TCGA-L7-A56G-01A-21R-A260-31.e3c5c0af-ed9c-4e0c-9a55-da118276b896.aligned	1	intron_retention_8113	FBXO2	ENSG00000116661.9	chr1 | -	IR	11709584:11709931-11709931:11710022-11710022:11710131	11709584:11710131	0.481	0.0904	1	0.305
ESCA	TCGA-L7-A6VZ-01A-12R-A336-31.31e00169-1384-418d-a5ef-1ee3a5478fad.aligned	1	intron_retention_8113	FBXO2	ENSG00000116661.9	chr1 | -	IR	11709584:11709931-11709931:11710022-11710022:11710131	11709584:11710131	0.481	0.0904	1	0.305
ESCA	TCGA-LN-A49M-01A-21R-A260-31.7ff2c851-5abf-427f-94aa-d856e631a687.aligned	0.83	intron_retention_8113	FBXO2	ENSG00000116661.9	chr1 | -	IR	11709584:11709931-11709931:11710022-11710022:11710131	11709584:11710131	0.481	0.0904	1	0.305
ESCA	TCGA-LN-A49O-01A-11R-A24K-31.97ea0ba9-7bd6-401f-82b9-825eaae856b9.aligned		intron_retention_8113	FBXO2	ENSG00000116661.9	chr1 | -	IR	11709584:11709931-11709931:11710022-11710022:11710131	11709584:11710131	0.481	0.0904	1	0.305
ESCA	TCGA-LN-A49P-01A-11R-A24K-31.f16e197e-d4b6-467f-887d-42452bd874b8.aligned		intron_retention_8113	FBXO2	ENSG00000116661.9	chr1 | -	IR	11709584:11709931-11709931:11710022-11710022:11710131	11709584:11710131	0.481	0.0904	1	0.305
ESCA	TCGA-LN-A49S-01A-11R-A24K-31.f6623404-cd45-49f0-ab4a-e1949420a562.aligned	1	intron_retention_8113	FBXO2	ENSG00000116661.9	chr1 | -	IR	11709584:11709931-11709931:11710022-11710022:11710131	11709584:11710131	0.481	0.0904	1	0.305
ESCA	TCGA-LN-A49U-01A-31R-A260-31.5dc9c9c1-df46-4c7f-8d6e-d7b1b73b894f.aligned		intron_retention_8113	FBXO2	ENSG00000116661.9	chr1 | -	IR	11709584:11709931-11709931:11710022-11710022:11710131	11709584:11710131	0.481	0.0904	1	0.305
ESCA	TCGA-LN-A49W-01A-11R-A260-31.1ad116a8-cb06-42c8-b328-8daaed381176.aligned	0.871	intron_retention_8113	FBXO2	ENSG00000116661.9	chr1 | -	IR	11709584:11709931-11709931:11710022-11710022:11710131	11709584:11710131	0.481	0.0904	1	0.305
ESCA	TCGA-LN-A49X-01A-31R-A260-31.b9e2e919-458c-4c82-82b4-21750c7683b4.aligned	1	intron_retention_8113	FBXO2	ENSG00000116661.9	chr1 | -	IR	11709584:11709931-11709931:11710022-11710022:11710131	11709584:11710131	0.481	0.0904	1	0.305
ESCA	TCGA-LN-A49Y-01A-11R-A260-31.66dde567-906c-4da0-9d52-1063db4122ec.aligned		intron_retention_8113	FBXO2	ENSG00000116661.9	chr1 | -	IR	11709584:11709931-11709931:11710022-11710022:11710131	11709584:11710131	0.481	0.0904	1	0.305
ESCA	TCGA-LN-A4A1-01A-21R-A260-31.92ac0fe5-ae5d-4302-85e4-491b4e881b19.aligned	0.797	intron_retention_8113	FBXO2	ENSG00000116661.9	chr1 | -	IR	11709584:11709931-11709931:11710022-11710022:11710131	11709584:11710131	0.481	0.0904	1	0.305
ESCA	TCGA-LN-A4A3-01A-11R-A260-31.5274a9c2-5c4c-4ec0-8028-1c6e2d0e1079.aligned	1	intron_retention_8113	FBXO2	ENSG00000116661.9	chr1 | -	IR	11709584:11709931-11709931:11710022-11710022:11710131	11709584:11710131	0.481	0.0904	1	0.305
ESCA	TCGA-LN-A4A4-01A-11R-A260-31.842dbf7e-5148-490d-b821-25742aa8c3ae.aligned		intron_retention_8113	FBXO2	ENSG00000116661.9	chr1 | -	IR	11709584:11709931-11709931:11710022-11710022:11710131	11709584:11710131	0.481	0.0904	1	0.305
ESCA	TCGA-LN-A4A5-01A-21R-A260-31.f29dd7c8-53b4-44fd-a868-a00230fba2da.aligned	1	intron_retention_8113	FBXO2	ENSG00000116661.9	chr1 | -	IR	11709584:11709931-11709931:11710022-11710022:11710131	11709584:11710131	0.481	0.0904	1	0.305
ESCA	TCGA-LN-A4A8-01A-32R-A260-31.1db4ac11-18c1-45ef-90de-fcb9d799d9ec.aligned	0.816	intron_retention_8113	FBXO2	ENSG00000116661.9	chr1 | -	IR	11709584:11709931-11709931:11710022-11710022:11710131	11709584:11710131	0.481	0.0904	1	0.305
ESCA	TCGA-LN-A4A9-01A-11R-A28J-31.27e10efe-b0fb-44fd-854e-1108699903a8.aligned		intron_retention_8113	FBXO2	ENSG00000116661.9	chr1 | -	IR	11709584:11709931-11709931:11710022-11710022:11710131	11709584:11710131	0.481	0.0904	1	0.305
ESCA	TCGA-LN-A4MQ-01A-11R-A28J-31.620d3776-74bf-429d-b34d-f43a39f62b37.aligned		intron_retention_8113	FBXO2	ENSG00000116661.9	chr1 | -	IR	11709584:11709931-11709931:11710022-11710022:11710131	11709584:11710131	0.481	0.0904	1	0.305
ESCA	TCGA-LN-A5U5-01A-21R-A28J-31.0fad8844-8fe9-4dc2-91d0-a7f7a210dcb9.aligned	0.865	intron_retention_8113	FBXO2	ENSG00000116661.9	chr1 | -	IR	11709584:11709931-11709931:11710022-11710022:11710131	11709584:11710131	0.481	0.0904	1	0.305
ESCA	TCGA-LN-A5U6-01A-11R-A28J-31.31d64da5-3a37-460d-86c9-83087e5ce986.aligned		intron_retention_8113	FBXO2	ENSG00000116661.9	chr1 | -	IR	11709584:11709931-11709931:11710022-11710022:11710131	11709584:11710131	0.481	0.0904	1	0.305
ESCA	TCGA-LN-A5U7-01A-11R-A31P-31.4c2b9466-cc62-4577-8576-3d52a9729747.aligned		intron_retention_8113	FBXO2	ENSG00000116661.9	chr1 | -	IR	11709584:11709931-11709931:11710022-11710022:11710131	11709584:11710131	0.481	0.0904	1	0.305
ESCA	TCGA-LN-A7HV-01A-21R-A354-31.1cdec593-eabd-4dcf-9488-9cb1c15678a7.aligned	1	intron_retention_8113	FBXO2	ENSG00000116661.9	chr1 | -	IR	11709584:11709931-11709931:11710022-11710022:11710131	11709584:11710131	0.481	0.0904	1	0.305
ESCA	TCGA-LN-A7HW-01A-22R-A354-31.99f26c4c-d53b-4de4-8886-e8a2822a433c.aligned		intron_retention_8113	FBXO2	ENSG00000116661.9	chr1 | -	IR	11709584:11709931-11709931:11710022-11710022:11710131	11709584:11710131	0.481	0.0904	1	0.305
ESCA	TCGA-LN-A7HX-01A-11R-A336-31.39d7da4b-54da-4633-a3c0-0839a14cda0a.aligned		intron_retention_8113	FBXO2	ENSG00000116661.9	chr1 | -	IR	11709584:11709931-11709931:11710022-11710022:11710131	11709584:11710131	0.481	0.0904	1	0.305
ESCA	TCGA-LN-A7HY-01A-12R-A354-31.fda5ca3b-23b2-476f-baea-1881b52929ab.aligned	0.856	intron_retention_8113	FBXO2	ENSG00000116661.9	chr1 | -	IR	11709584:11709931-11709931:11710022-11710022:11710131	11709584:11710131	0.481	0.0904	1	0.305
ESCA	TCGA-LN-A7HZ-01A-31R-A354-31.32f8e48f-298b-44de-b33d-6c69997c29e7.aligned		intron_retention_8113	FBXO2	ENSG00000116661.9	chr1 | -	IR	11709584:11709931-11709931:11710022-11710022:11710131	11709584:11710131	0.481	0.0904	1	0.305
ESCA	TCGA-LN-A8HZ-01A-11R-A36D-31.b28abeb1-4fc2-44c4-a3ea-cd0060914bb9.aligned		intron_retention_8113	FBXO2	ENSG00000116661.9	chr1 | -	IR	11709584:11709931-11709931:11710022-11710022:11710131	11709584:11710131	0.481	0.0904	1	0.305
ESCA	TCGA-LN-A8I0-01A-11R-A36D-31.20de8b59-fe73-4e57-97c1-b951896b0c29.aligned	1	intron_retention_8113	FBXO2	ENSG00000116661.9	chr1 | -	IR	11709584:11709931-11709931:11710022-11710022:11710131	11709584:11710131	0.481	0.0904	1	0.305
ESCA	TCGA-LN-A8I1-01A-11R-A36D-31.a7822cf2-fedc-4f01-a628-c67d8b7d0e85.aligned	1	intron_retention_8113	FBXO2	ENSG00000116661.9	chr1 | -	IR	11709584:11709931-11709931:11710022-11710022:11710131	11709584:11710131	0.481	0.0904	1	0.305
ESCA	TCGA-LN-A9FR-01A-11R-A38D-31.094ff108-ef44-4a75-9aa6-f4dabed7817a.aligned		intron_retention_8113	FBXO2	ENSG00000116661.9	chr1 | -	IR	11709584:11709931-11709931:11710022-11710022:11710131	11709584:11710131	0.481	0.0904	1	0.305
ESCA	TCGA-M9-A5M8-01A-11R-A28J-31.0baa4161-2e58-4942-8a32-6135060d8f03.aligned	0.854	intron_retention_8113	FBXO2	ENSG00000116661.9	chr1 | -	IR	11709584:11709931-11709931:11710022-11710022:11710131	11709584:11710131	0.481	0.0904	1	0.305
ESCA	TCGA-Q9-A6FW-01A-31R-A31P-31.d5edca9d-b527-41ce-b6c6-ddf99275681b.aligned		intron_retention_8113	FBXO2	ENSG00000116661.9	chr1 | -	IR	11709584:11709931-11709931:11710022-11710022:11710131	11709584:11710131	0.481	0.0904	1	0.305
ESCA	TCGA-R6-A6DN-01B-11R-A31P-31.4091639e-e22e-4731-8d2f-634f46472ae6.aligned		intron_retention_8113	FBXO2	ENSG00000116661.9	chr1 | -	IR	11709584:11709931-11709931:11710022-11710022:11710131	11709584:11710131	0.481	0.0904	1	0.305
ESCA	TCGA-R6-A6DQ-01B-11R-A31P-31.47961958-4d67-4b23-b359-acbc4e480758.aligned		intron_retention_8113	FBXO2	ENSG00000116661.9	chr1 | -	IR	11709584:11709931-11709931:11710022-11710022:11710131	11709584:11710131	0.481	0.0904	1	0.305
ESCA	TCGA-R6-A6KZ-01A-11R-A31P-31.36bd8402-c606-4aab-a9cc-1de97f3e9d41.aligned	1	intron_retention_8113	FBXO2	ENSG00000116661.9	chr1 | -	IR	11709584:11709931-11709931:11710022-11710022:11710131	11709584:11710131	0.481	0.0904	1	0.305
ESCA	TCGA-R6-A6L4-01A-11R-A31P-31.2e53b266-1064-4cd0-99fa-79983cf8187c.aligned	1	intron_retention_8113	FBXO2	ENSG00000116661.9	chr1 | -	IR	11709584:11709931-11709931:11710022-11710022:11710131	11709584:11710131	0.481	0.0904	1	0.305
ESCA	TCGA-R6-A6XG-01B-11R-A336-31.16014dc9-b654-4670-8fbd-9d0dbb6d66d5.aligned	1	intron_retention_8113	FBXO2	ENSG00000116661.9	chr1 | -	IR	11709584:11709931-11709931:11710022-11710022:11710131	11709584:11710131	0.481	0.0904	1	0.305
ESCA	TCGA-R6-A6XQ-01B-11R-A336-31.501c9cf2-ff7f-4f35-bace-52cc4392237d.aligned	0.739	intron_retention_8113	FBXO2	ENSG00000116661.9	chr1 | -	IR	11709584:11709931-11709931:11710022-11710022:11710131	11709584:11710131	0.481	0.0904	1	0.305
ESCA	TCGA-R6-A6Y0-01B-11R-A336-31.a9657ea3-d72c-4b75-b5cc-6babb58c2f98.aligned		intron_retention_8113	FBXO2	ENSG00000116661.9	chr1 | -	IR	11709584:11709931-11709931:11710022-11710022:11710131	11709584:11710131	0.481	0.0904	1	0.305
ESCA	TCGA-R6-A8W5-01B-11R-A37I-31.e3e998fd-4175-474d-8cbe-5fa89ab6399c.aligned	1	intron_retention_8113	FBXO2	ENSG00000116661.9	chr1 | -	IR	11709584:11709931-11709931:11710022-11710022:11710131	11709584:11710131	0.481	0.0904	1	0.305
ESCA	TCGA-R6-A8W8-01B-11R-A37I-31.c8e761a0-3d28-4094-8eaa-1c48ea23b3c9.aligned		intron_retention_8113	FBXO2	ENSG00000116661.9	chr1 | -	IR	11709584:11709931-11709931:11710022-11710022:11710131	11709584:11710131	0.481	0.0904	1	0.305
ESCA	TCGA-R6-A8WC-01A-11R-A37I-31.9b6aadf0-8965-4dd9-88bd-b06d8833b330.aligned		intron_retention_8113	FBXO2	ENSG00000116661.9	chr1 | -	IR	11709584:11709931-11709931:11710022-11710022:11710131	11709584:11710131	0.481	0.0904	1	0.305
ESCA	TCGA-R6-A8WG-01A-11R-A37I-31.304c0cbd-13cd-4822-b4ed-2c873c79cf91.aligned	0.843	intron_retention_8113	FBXO2	ENSG00000116661.9	chr1 | -	IR	11709584:11709931-11709931:11710022-11710022:11710131	11709584:11710131	0.481	0.0904	1	0.305
ESCA	TCGA-RE-A7BO-01A-11R-A336-31.617bbc20-dfda-4738-9a07-e18b8ca3b818.aligned		intron_retention_8113	FBXO2	ENSG00000116661.9	chr1 | -	IR	11709584:11709931-11709931:11710022-11710022:11710131	11709584:11710131	0.481	0.0904	1	0.305
ESCA	TCGA-S8-A6BV-01A-21R-A31P-31.6085ec16-9e37-456e-9920-76bfa72a1651.aligned	0.829	intron_retention_8113	FBXO2	ENSG00000116661.9	chr1 | -	IR	11709584:11709931-11709931:11710022-11710022:11710131	11709584:11710131	0.481	0.0904	1	0.305
ESCA	TCGA-S8-A6BW-01A-11R-A31P-31.bfbb7022-d5d9-4e24-b410-0b85068df694.aligned	1	intron_retention_8113	FBXO2	ENSG00000116661.9	chr1 | -	IR	11709584:11709931-11709931:11710022-11710022:11710131	11709584:11710131	0.481	0.0904	1	0.305
ESCA	TCGA-V5-A7RB-01A-11R-A354-31.84099f52-014e-48bc-86fb-e3db8246c0ad.aligned		intron_retention_8113	FBXO2	ENSG00000116661.9	chr1 | -	IR	11709584:11709931-11709931:11710022-11710022:11710131	11709584:11710131	0.481	0.0904	1	0.305
ESCA	TCGA-V5-A7RE-01A-11R-A354-31.349ac9de-cfd8-4b45-bc9f-3951ea356488.aligned		intron_retention_8113	FBXO2	ENSG00000116661.9	chr1 | -	IR	11709584:11709931-11709931:11710022-11710022:11710131	11709584:11710131	0.481	0.0904	1	0.305
ESCA	TCGA-V5-A7RE-11A-11R-A354-31.1f0a6ab7-ec79-4f8e-82ca-8d4b91613b6b.aligned	1	intron_retention_8113	FBXO2	ENSG00000116661.9	chr1 | -	IR	11709584:11709931-11709931:11710022-11710022:11710131	11709584:11710131	0.481	0.0904	1	0.305
ESCA	TCGA-V5-AASX-11A-11R-A38D-31.7f27b385-8738-4a9b-8f32-57a40bc10372.aligned	1	intron_retention_8113	FBXO2	ENSG00000116661.9	chr1 | -	IR	11709584:11709931-11709931:11710022-11710022:11710131	11709584:11710131	0.481	0.0904	1	0.305
ESCA	TCGA-VR-A8EO-01A-11R-A36D-31.264bd4f0-7c96-4c7a-91cd-604c2919e646.aligned		intron_retention_8113	FBXO2	ENSG00000116661.9	chr1 | -	IR	11709584:11709931-11709931:11710022-11710022:11710131	11709584:11710131	0.481	0.0904	1	0.305
ESCA	TCGA-VR-A8EQ-01A-11R-A36D-31.b0e7793c-d6fd-4e63-98dd-f029b635a04c.aligned	1	intron_retention_8113	FBXO2	ENSG00000116661.9	chr1 | -	IR	11709584:11709931-11709931:11710022-11710022:11710131	11709584:11710131	0.481	0.0904	1	0.305
ESCA	TCGA-VR-A8ER-01A-11R-A36D-31.0e74c420-35e1-446d-b1e6-1d9fb18bd787.aligned		intron_retention_8113	FBXO2	ENSG00000116661.9	chr1 | -	IR	11709584:11709931-11709931:11710022-11710022:11710131	11709584:11710131	0.481	0.0904	1	0.305
ESCA	TCGA-VR-A8EU-01A-11R-A36D-31.52a91d30-59cf-4bfe-841e-0ea6cba88ff7.aligned		intron_retention_8113	FBXO2	ENSG00000116661.9	chr1 | -	IR	11709584:11709931-11709931:11710022-11710022:11710131	11709584:11710131	0.481	0.0904	1	0.305
ESCA	TCGA-VR-A8EW-01A-11R-A36D-31.808a898f-11ce-4a82-9329-20a3fd5a1c86.aligned		intron_retention_8113	FBXO2	ENSG00000116661.9	chr1 | -	IR	11709584:11709931-11709931:11710022-11710022:11710131	11709584:11710131	0.481	0.0904	1	0.305
ESCA	TCGA-VR-A8EX-01A-11R-A36D-31.8894b7f2-c54d-4ae3-9e10-8828d60de955.aligned		intron_retention_8113	FBXO2	ENSG00000116661.9	chr1 | -	IR	11709584:11709931-11709931:11710022-11710022:11710131	11709584:11710131	0.481	0.0904	1	0.305
ESCA	TCGA-VR-A8EY-01A-11R-A36D-31.0e360f52-b968-4423-869d-008cf4bbcb3c.aligned		intron_retention_8113	FBXO2	ENSG00000116661.9	chr1 | -	IR	11709584:11709931-11709931:11710022-11710022:11710131	11709584:11710131	0.481	0.0904	1	0.305
ESCA	TCGA-VR-A8EZ-01A-11R-A36D-31.72c0caa7-6424-44a6-87f3-8dbd9000ed85.aligned		intron_retention_8113	FBXO2	ENSG00000116661.9	chr1 | -	IR	11709584:11709931-11709931:11710022-11710022:11710131	11709584:11710131	0.481	0.0904	1	0.305
ESCA	TCGA-VR-A8Q7-01A-11R-A37I-31.488fedbe-5cd7-4415-a2f2-54a3989aa6af.aligned	1	intron_retention_8113	FBXO2	ENSG00000116661.9	chr1 | -	IR	11709584:11709931-11709931:11710022-11710022:11710131	11709584:11710131	0.481	0.0904	1	0.305
ESCA	TCGA-VR-AA4G-01A-11R-A37I-31.db6beed3-a5a2-469f-8dc8-00d838c1f37f.aligned	1	intron_retention_8113	FBXO2	ENSG00000116661.9	chr1 | -	IR	11709584:11709931-11709931:11710022-11710022:11710131	11709584:11710131	0.481	0.0904	1	0.305
ESCA	TCGA-XP-A8T6-01A-11R-A36D-31.a3f5c42a-35e5-4884-8d0a-1fd8917c06ce.aligned		intron_retention_8113	FBXO2	ENSG00000116661.9	chr1 | -	IR	11709584:11709931-11709931:11710022-11710022:11710131	11709584:11710131	0.481	0.0904	1	0.305
ESCA	TCGA-XP-A8T8-01A-11R-A36D-31.576da4f6-4fda-4ee6-a0ff-8ab5e55ed5cb.aligned		intron_retention_8113	FBXO2	ENSG00000116661.9	chr1 | -	IR	11709584:11709931-11709931:11710022-11710022:11710131	11709584:11710131	0.481	0.0904	1	0.305
ESCA	TCGA-Z6-A8JD-01A-11R-A36D-31.bd6c5d79-5f03-476a-ba01-03834083c7ff.aligned	0.8	intron_retention_8113	FBXO2	ENSG00000116661.9	chr1 | -	IR	11709584:11709931-11709931:11710022-11710022:11710131	11709584:11710131	0.481	0.0904	1	0.305
ESCA	TCGA-Z6-A8JE-01A-11R-A37I-31.9af58c98-1b09-4560-891d-7bdfa1f2c680.aligned		intron_retention_8113	FBXO2	ENSG00000116661.9	chr1 | -	IR	11709584:11709931-11709931:11710022-11710022:11710131	11709584:11710131	0.481	0.0904	1	0.305
ESCA	TCGA-Z6-A9VB-01A-21R-A37I-31.b6c4294b-2f95-4cb1-b393-42a1c2e34f3a.aligned		intron_retention_8113	FBXO2	ENSG00000116661.9	chr1 | -	IR	11709584:11709931-11709931:11710022-11710022:11710131	11709584:11710131	0.481	0.0904	1	0.305
ESCA	TCGA-ZR-A9CJ-01B-11R-A38D-31.53913eb9-aecc-4b4a-936b-ce4286281a32.aligned	1	intron_retention_8113	FBXO2	ENSG00000116661.9	chr1 | -	IR	11709584:11709931-11709931:11710022-11710022:11710131	11709584:11710131	0.481	0.0904	1	0.305
KICH	TCGA-KL-8323-01A-21R-2315-07.cb8180ec-ce5f-4c1f-ab1a-38717607169f.aligned	0.587	intron_retention_8113	FBXO2	ENSG00000116661.9	chr1 | -	IR	11709584:11709931-11709931:11710022-11710022:11710131	11709584:11710131	0.977	0.1737	1	0.462
KICH	TCGA-KL-8324-01A-11R-2315-07.bc33e129-174b-4193-b65a-844e06984a81.aligned	1	intron_retention_8113	FBXO2	ENSG00000116661.9	chr1 | -	IR	11709584:11709931-11709931:11710022-11710022:11710131	11709584:11710131	0.977	0.1737	1	0.462
KICH	TCGA-KL-8324-11A-01R-2315-07.6a753497-6d42-4c65-a54a-c14bcbcaaf62.aligned	0.586	intron_retention_8113	FBXO2	ENSG00000116661.9	chr1 | -	IR	11709584:11709931-11709931:11710022-11710022:11710131	11709584:11710131	0.977	0.1737	1	0.462
KICH	TCGA-KL-8325-01A-11R-2315-07.faad58ae-6000-4ab9-8469-ecd92f0344ff.aligned	1	intron_retention_8113	FBXO2	ENSG00000116661.9	chr1 | -	IR	11709584:11709931-11709931:11710022-11710022:11710131	11709584:11710131	0.977	0.1737	1	0.462
KICH	TCGA-KL-8326-01A-11R-2315-07.90c36d60-f8f2-4bf6-9f01-fc02e19dde5d.aligned	1	intron_retention_8113	FBXO2	ENSG00000116661.9	chr1 | -	IR	11709584:11709931-11709931:11710022-11710022:11710131	11709584:11710131	0.977	0.1737	1	0.462
KICH	TCGA-KL-8326-11A-01R-2315-07.34864a18-2c95-4cbd-9f73-405a38f6d37e.aligned	1	intron_retention_8113	FBXO2	ENSG00000116661.9	chr1 | -	IR	11709584:11709931-11709931:11710022-11710022:11710131	11709584:11710131	0.977	0.1737	1	0.462
KICH	TCGA-KL-8328-01A-11R-2315-07.777339be-465d-4877-9f73-6c49b9326e73.aligned	0.739	intron_retention_8113	FBXO2	ENSG00000116661.9	chr1 | -	IR	11709584:11709931-11709931:11710022-11710022:11710131	11709584:11710131	0.977	0.1737	1	0.462
KICH	TCGA-KL-8329-01A-11R-2315-07.e5ea7704-6e27-4c1e-878e-1bcc809cbf2b.aligned	1	intron_retention_8113	FBXO2	ENSG00000116661.9	chr1 | -	IR	11709584:11709931-11709931:11710022-11710022:11710131	11709584:11710131	0.977	0.1737	1	0.462
KICH	TCGA-KL-8329-11A-01R-2315-07.7af273bb-bede-495c-8a07-0a1d5d23a0eb.aligned	1	intron_retention_8113	FBXO2	ENSG00000116661.9	chr1 | -	IR	11709584:11709931-11709931:11710022-11710022:11710131	11709584:11710131	0.977	0.1737	1	0.462
KICH	TCGA-KL-8330-01A-11R-2315-07.ab48f18b-485b-4258-9940-b8b536bd2d04.aligned	1	intron_retention_8113	FBXO2	ENSG00000116661.9	chr1 | -	IR	11709584:11709931-11709931:11710022-11710022:11710131	11709584:11710131	0.977	0.1737	1	0.462
KICH	TCGA-KL-8331-01A-11R-2315-07.97fd79a1-7275-47c2-bd10-b62eb0622856.aligned	1	intron_retention_8113	FBXO2	ENSG00000116661.9	chr1 | -	IR	11709584:11709931-11709931:11710022-11710022:11710131	11709584:11710131	0.977	0.1737	1	0.462
KICH	TCGA-KL-8332-01A-11R-2315-07.d937a17b-e4a9-4299-bb8a-6147483ee11e.aligned	1	intron_retention_8113	FBXO2	ENSG00000116661.9	chr1 | -	IR	11709584:11709931-11709931:11710022-11710022:11710131	11709584:11710131	0.977	0.1737	1	0.462
KICH	TCGA-KL-8333-01A-11R-2315-07.b7b1b89b-13f9-4cae-9673-34e4c31cd3ca.aligned	0.722	intron_retention_8113	FBXO2	ENSG00000116661.9	chr1 | -	IR	11709584:11709931-11709931:11710022-11710022:11710131	11709584:11710131	0.977	0.1737	1	0.462
KICH	TCGA-KL-8334-01A-11R-2315-07.733eaed2-1df1-4832-bc6a-a401b1021795.aligned	0.725	intron_retention_8113	FBXO2	ENSG00000116661.9	chr1 | -	IR	11709584:11709931-11709931:11710022-11710022:11710131	11709584:11710131	0.977	0.1737	1	0.462
KICH	TCGA-KL-8335-01A-11R-2315-07.1e9eb42f-6c0c-4bfe-8ffe-f300d2700697.aligned	1	intron_retention_8113	FBXO2	ENSG00000116661.9	chr1 | -	IR	11709584:11709931-11709931:11710022-11710022:11710131	11709584:11710131	0.977	0.1737	1	0.462
KICH	TCGA-KL-8336-01A-11R-2315-07.cac2a45e-6d54-4e63-a921-3b4183b8677a.aligned	0.598	intron_retention_8113	FBXO2	ENSG00000116661.9	chr1 | -	IR	11709584:11709931-11709931:11710022-11710022:11710131	11709584:11710131	0.977	0.1737	1	0.462
KICH	TCGA-KL-8336-11A-01R-2315-07.cc2d2364-0f6a-4387-8b01-41402bfa15ee.aligned	1	intron_retention_8113	FBXO2	ENSG00000116661.9	chr1 | -	IR	11709584:11709931-11709931:11710022-11710022:11710131	11709584:11710131	0.977	0.1737	1	0.462
KICH	TCGA-KL-8337-01A-11R-2315-07.44b567d8-025b-4f5b-80aa-4e19c6a6afc7.aligned	0.634	intron_retention_8113	FBXO2	ENSG00000116661.9	chr1 | -	IR	11709584:11709931-11709931:11710022-11710022:11710131	11709584:11710131	0.977	0.1737	1	0.462
KICH	TCGA-KL-8338-01A-11R-2315-07.c8506a16-e3ac-445d-bd12-65adf10e813f.aligned	0.74	intron_retention_8113	FBXO2	ENSG00000116661.9	chr1 | -	IR	11709584:11709931-11709931:11710022-11710022:11710131	11709584:11710131	0.977	0.1737	1	0.462
KICH	TCGA-KL-8339-01A-11R-2315-07.c2a7dae3-028c-4434-b7f1-07dafe196acf.aligned	1	intron_retention_8113	FBXO2	ENSG00000116661.9	chr1 | -	IR	11709584:11709931-11709931:11710022-11710022:11710131	11709584:11710131	0.977	0.1737	1	0.462
KICH	TCGA-KL-8339-11A-01R-2315-07.ce000792-03e1-4f52-b65c-046b2b504cf1.aligned	0.666	intron_retention_8113	FBXO2	ENSG00000116661.9	chr1 | -	IR	11709584:11709931-11709931:11710022-11710022:11710131	11709584:11710131	0.977	0.1737	1	0.462
KICH	TCGA-KL-8340-01A-11R-2315-07.102bbfea-fb71-41c8-899d-75670fda81e8.aligned	0.641	intron_retention_8113	FBXO2	ENSG00000116661.9	chr1 | -	IR	11709584:11709931-11709931:11710022-11710022:11710131	11709584:11710131	0.977	0.1737	1	0.462
KICH	TCGA-KL-8341-01A-11R-2315-07.ca134742-0f02-4178-b1bf-c6f7a9ff8cce.aligned	0.667	intron_retention_8113	FBXO2	ENSG00000116661.9	chr1 | -	IR	11709584:11709931-11709931:11710022-11710022:11710131	11709584:11710131	0.977	0.1737	1	0.462
KICH	TCGA-KL-8342-01A-11R-2315-07.baa1261d-78ae-4a47-8459-2513361ba6de.aligned	0.652	intron_retention_8113	FBXO2	ENSG00000116661.9	chr1 | -	IR	11709584:11709931-11709931:11710022-11710022:11710131	11709584:11710131	0.977	0.1737	1	0.462
KICH	TCGA-KL-8343-01A-11R-2315-07.131cd009-c2f2-4e38-a72d-2018af79986a.aligned	1	intron_retention_8113	FBXO2	ENSG00000116661.9	chr1 | -	IR	11709584:11709931-11709931:11710022-11710022:11710131	11709584:11710131	0.977	0.1737	1	0.462
KICH	TCGA-KL-8344-01A-11R-2315-07.5cb8881d-dc6e-4b62-b9a3-d96c83d2567e.aligned	1	intron_retention_8113	FBXO2	ENSG00000116661.9	chr1 | -	IR	11709584:11709931-11709931:11710022-11710022:11710131	11709584:11710131	0.977	0.1737	1	0.462
KICH	TCGA-KL-8345-01A-11R-2315-07.182a5fad-d6f5-4656-b198-aceb2ac081d1.aligned	1	intron_retention_8113	FBXO2	ENSG00000116661.9	chr1 | -	IR	11709584:11709931-11709931:11710022-11710022:11710131	11709584:11710131	0.977	0.1737	1	0.462
KICH	TCGA-KL-8346-01A-11R-2315-07.7e8e0292-b1af-48af-9c53-823d7e0432c9.aligned	0.68	intron_retention_8113	FBXO2	ENSG00000116661.9	chr1 | -	IR	11709584:11709931-11709931:11710022-11710022:11710131	11709584:11710131	0.977	0.1737	1	0.462
KICH	TCGA-KM-8438-01A-11R-2315-07.894cd09b-645d-43b8-93ea-5f7f48db12da.aligned	1	intron_retention_8113	FBXO2	ENSG00000116661.9	chr1 | -	IR	11709584:11709931-11709931:11710022-11710022:11710131	11709584:11710131	0.977	0.1737	1	0.462
KICH	TCGA-KM-8439-01A-11R-2315-07.e03cb807-3698-434e-8145-6f1620bfd1b4.aligned	1	intron_retention_8113	FBXO2	ENSG00000116661.9	chr1 | -	IR	11709584:11709931-11709931:11710022-11710022:11710131	11709584:11710131	0.977	0.1737	1	0.462
KICH	TCGA-KM-8440-01A-11R-2315-07.fd4eb5ce-47b3-4c31-b9c5-ca08b3f580db.aligned	1	intron_retention_8113	FBXO2	ENSG00000116661.9	chr1 | -	IR	11709584:11709931-11709931:11710022-11710022:11710131	11709584:11710131	0.977	0.1737	1	0.462
KICH	TCGA-KM-8441-01A-11R-2315-07.93543d44-72a0-4f35-bc35-3acffc85ced6.aligned	0.606	intron_retention_8113	FBXO2	ENSG00000116661.9	chr1 | -	IR	11709584:11709931-11709931:11710022-11710022:11710131	11709584:11710131	0.977	0.1737	1	0.462
KICH	TCGA-KM-8442-01A-11R-2315-07.efc2a8d3-1ef2-4719-b60d-bd752edda684.aligned	1	intron_retention_8113	FBXO2	ENSG00000116661.9	chr1 | -	IR	11709584:11709931-11709931:11710022-11710022:11710131	11709584:11710131	0.977	0.1737	1	0.462
KICH	TCGA-KM-8443-01A-11R-2315-07.114b9dbd-0672-4b83-8bdc-cc2432f4fd91.aligned	1	intron_retention_8113	FBXO2	ENSG00000116661.9	chr1 | -	IR	11709584:11709931-11709931:11710022-11710022:11710131	11709584:11710131	0.977	0.1737	1	0.462
KICH	TCGA-KM-8476-01A-11R-2315-07.19f0564c-19e3-4e32-8362-750fc676f576.aligned	0.622	intron_retention_8113	FBXO2	ENSG00000116661.9	chr1 | -	IR	11709584:11709931-11709931:11710022-11710022:11710131	11709584:11710131	0.977	0.1737	1	0.462
KICH	TCGA-KM-8477-01A-11R-2315-07.b06483d3-e2c0-4f6f-9af4-871c922eb506.aligned	0.809	intron_retention_8113	FBXO2	ENSG00000116661.9	chr1 | -	IR	11709584:11709931-11709931:11710022-11710022:11710131	11709584:11710131	0.977	0.1737	1	0.462
KICH	TCGA-KM-8639-01A-11R-2403-07.01816f78-7cee-4160-8a99-85cb23d3a124.aligned	0.656	intron_retention_8113	FBXO2	ENSG00000116661.9	chr1 | -	IR	11709584:11709931-11709931:11710022-11710022:11710131	11709584:11710131	0.977	0.1737	1	0.462
KICH	TCGA-KN-8418-01A-11R-2315-07.4421b2c6-8de1-41c3-a47a-20c60a86b694.aligned	0.582	intron_retention_8113	FBXO2	ENSG00000116661.9	chr1 | -	IR	11709584:11709931-11709931:11710022-11710022:11710131	11709584:11710131	0.977	0.1737	1	0.462
KICH	TCGA-KN-8419-01A-11R-2315-07.67e21e3d-63a0-4fca-9880-58a71c938294.aligned	0.538	intron_retention_8113	FBXO2	ENSG00000116661.9	chr1 | -	IR	11709584:11709931-11709931:11710022-11710022:11710131	11709584:11710131	0.977	0.1737	1	0.462
KICH	TCGA-KN-8419-11A-01R-2315-07.0d5727f8-2f06-4b7e-bc23-0241d44594cc.aligned	1	intron_retention_8113	FBXO2	ENSG00000116661.9	chr1 | -	IR	11709584:11709931-11709931:11710022-11710022:11710131	11709584:11710131	0.977	0.1737	1	0.462
KICH	TCGA-KN-8421-01A-11R-2315-07.17aa0cc6-c07e-4512-8c0a-e520863a58e4.aligned	1	intron_retention_8113	FBXO2	ENSG00000116661.9	chr1 | -	IR	11709584:11709931-11709931:11710022-11710022:11710131	11709584:11710131	0.977	0.1737	1	0.462
KICH	TCGA-KN-8422-11A-01R-2315-07.981a7d0e-ca01-476d-bd58-a46b8d8595cc.aligned	0.675	intron_retention_8113	FBXO2	ENSG00000116661.9	chr1 | -	IR	11709584:11709931-11709931:11710022-11710022:11710131	11709584:11710131	0.977	0.1737	1	0.462
KICH	TCGA-KN-8423-01A-11R-2315-07.ec85470e-1f9c-46fd-87d2-02b00947abb5.aligned	1	intron_retention_8113	FBXO2	ENSG00000116661.9	chr1 | -	IR	11709584:11709931-11709931:11710022-11710022:11710131	11709584:11710131	0.977	0.1737	1	0.462
KICH	TCGA-KN-8423-11A-01R-2315-07.d7dcd997-63d5-4e12-9c26-c5ddd0e02fb0.aligned	0.624	intron_retention_8113	FBXO2	ENSG00000116661.9	chr1 | -	IR	11709584:11709931-11709931:11710022-11710022:11710131	11709584:11710131	0.977	0.1737	1	0.462
KICH	TCGA-KN-8424-01A-11R-2315-07.e8cc9981-3f57-49cc-9779-72d1c50bc59a.aligned	1	intron_retention_8113	FBXO2	ENSG00000116661.9	chr1 | -	IR	11709584:11709931-11709931:11710022-11710022:11710131	11709584:11710131	0.977	0.1737	1	0.462
KICH	TCGA-KN-8424-11A-01R-2315-07.365edca8-a3eb-4e98-9243-90b121b7222c.aligned	1	intron_retention_8113	FBXO2	ENSG00000116661.9	chr1 | -	IR	11709584:11709931-11709931:11710022-11710022:11710131	11709584:11710131	0.977	0.1737	1	0.462
KICH	TCGA-KN-8425-01A-11R-2315-07.d42c9589-3960-4964-be28-83d275bdc672.aligned	1	intron_retention_8113	FBXO2	ENSG00000116661.9	chr1 | -	IR	11709584:11709931-11709931:11710022-11710022:11710131	11709584:11710131	0.977	0.1737	1	0.462
KICH	TCGA-KN-8425-11A-01R-2315-07.ba365c68-a51f-4802-98b4-7fbf7e35bafc.aligned	0.683	intron_retention_8113	FBXO2	ENSG00000116661.9	chr1 | -	IR	11709584:11709931-11709931:11710022-11710022:11710131	11709584:11710131	0.977	0.1737	1	0.462
KICH	TCGA-KN-8426-01A-11R-2315-07.2a70e115-e2dd-4c26-bd20-b09c58f551c7.aligned	0.606	intron_retention_8113	FBXO2	ENSG00000116661.9	chr1 | -	IR	11709584:11709931-11709931:11710022-11710022:11710131	11709584:11710131	0.977	0.1737	1	0.462
KICH	TCGA-KN-8426-11A-01R-2315-07.2b684237-e6b2-4f87-882e-3fa8ffbb829e.aligned	0.661	intron_retention_8113	FBXO2	ENSG00000116661.9	chr1 | -	IR	11709584:11709931-11709931:11710022-11710022:11710131	11709584:11710131	0.977	0.1737	1	0.462
KICH	TCGA-KN-8427-01A-11R-2315-07.ee8417b7-5d4b-42e7-b0f1-094a9990fda8.aligned		intron_retention_8113	FBXO2	ENSG00000116661.9	chr1 | -	IR	11709584:11709931-11709931:11710022-11710022:11710131	11709584:11710131	0.977	0.1737	1	0.462
KICH	TCGA-KN-8427-11A-01R-2315-07.1a2a7cd4-e8cb-4333-b5bd-990a37041df1.aligned	0.987	intron_retention_8113	FBXO2	ENSG00000116661.9	chr1 | -	IR	11709584:11709931-11709931:11710022-11710022:11710131	11709584:11710131	0.977	0.1737	1	0.462
KICH	TCGA-KN-8428-01A-11R-2315-07.91aaef0d-6d3f-43e8-90b9-7c8e86beb2c6.aligned	0.977	intron_retention_8113	FBXO2	ENSG00000116661.9	chr1 | -	IR	11709584:11709931-11709931:11710022-11710022:11710131	11709584:11710131	0.977	0.1737	1	0.462
KICH	TCGA-KN-8428-11A-01R-2315-07.a882f372-5345-4810-87d1-bf82a4be5aa3.aligned	1	intron_retention_8113	FBXO2	ENSG00000116661.9	chr1 | -	IR	11709584:11709931-11709931:11710022-11710022:11710131	11709584:11710131	0.977	0.1737	1	0.462
KICH	TCGA-KN-8429-01A-11R-2315-07.1573fde6-2abe-4ef8-b2f3-3c33507aca0c.aligned	0.663	intron_retention_8113	FBXO2	ENSG00000116661.9	chr1 | -	IR	11709584:11709931-11709931:11710022-11710022:11710131	11709584:11710131	0.977	0.1737	1	0.462
KICH	TCGA-KN-8429-11A-01R-2315-07.a6adbcc1-dc20-4d7f-8397-d699a64287e0.aligned	1	intron_retention_8113	FBXO2	ENSG00000116661.9	chr1 | -	IR	11709584:11709931-11709931:11710022-11710022:11710131	11709584:11710131	0.977	0.1737	1	0.462
KICH	TCGA-KN-8430-01A-11R-2315-07.632dbd49-0206-4a3e-9791-3c51c2c40af5.aligned	1	intron_retention_8113	FBXO2	ENSG00000116661.9	chr1 | -	IR	11709584:11709931-11709931:11710022-11710022:11710131	11709584:11710131	0.977	0.1737	1	0.462
KICH	TCGA-KN-8430-11A-01R-2315-07.deb2a587-f82c-4e0c-8902-7cd307900574.aligned	0.643	intron_retention_8113	FBXO2	ENSG00000116661.9	chr1 | -	IR	11709584:11709931-11709931:11710022-11710022:11710131	11709584:11710131	0.977	0.1737	1	0.462
KICH	TCGA-KN-8431-01A-11R-2315-07.58d4d6ea-cb30-47f9-87ff-d2dec6e3385e.aligned	1	intron_retention_8113	FBXO2	ENSG00000116661.9	chr1 | -	IR	11709584:11709931-11709931:11710022-11710022:11710131	11709584:11710131	0.977	0.1737	1	0.462
KICH	TCGA-KN-8431-11A-01R-2315-07.dcdeb647-e266-4494-ab18-1798ccbfabf4.aligned	0.58	intron_retention_8113	FBXO2	ENSG00000116661.9	chr1 | -	IR	11709584:11709931-11709931:11710022-11710022:11710131	11709584:11710131	0.977	0.1737	1	0.462
KICH	TCGA-KN-8432-01A-11R-2315-07.4300d79a-b4c8-4d95-8a42-4d5d8962eadc.aligned	1	intron_retention_8113	FBXO2	ENSG00000116661.9	chr1 | -	IR	11709584:11709931-11709931:11710022-11710022:11710131	11709584:11710131	0.977	0.1737	1	0.462
KICH	TCGA-KN-8432-11A-01R-2315-07.4d3c1834-7351-4aaa-aa2c-70e0c06ebbce.aligned	1	intron_retention_8113	FBXO2	ENSG00000116661.9	chr1 | -	IR	11709584:11709931-11709931:11710022-11710022:11710131	11709584:11710131	0.977	0.1737	1	0.462
KICH	TCGA-KN-8433-01A-11R-2315-07.a259c8ba-80df-4398-bc4a-34ee841becdb.aligned	0.636	intron_retention_8113	FBXO2	ENSG00000116661.9	chr1 | -	IR	11709584:11709931-11709931:11710022-11710022:11710131	11709584:11710131	0.977	0.1737	1	0.462
KICH	TCGA-KN-8433-11A-01R-2315-07.13f286ad-31e3-4ac7-94d2-d6f6a6c12c0e.aligned	1	intron_retention_8113	FBXO2	ENSG00000116661.9	chr1 | -	IR	11709584:11709931-11709931:11710022-11710022:11710131	11709584:11710131	0.977	0.1737	1	0.462
KICH	TCGA-KN-8434-01A-11R-2315-07.17238de6-eab7-47ed-948e-be06ee5de5b7.aligned	0.767	intron_retention_8113	FBXO2	ENSG00000116661.9	chr1 | -	IR	11709584:11709931-11709931:11710022-11710022:11710131	11709584:11710131	0.977	0.1737	1	0.462
KICH	TCGA-KN-8434-11A-01R-2315-07.8d1db793-102c-4ddf-a006-c69b7c96d099.aligned	1	intron_retention_8113	FBXO2	ENSG00000116661.9	chr1 | -	IR	11709584:11709931-11709931:11710022-11710022:11710131	11709584:11710131	0.977	0.1737	1	0.462
KICH	TCGA-KN-8435-01A-11R-2315-07.0acf650f-8275-4319-bdb4-bb0a6c35c235.aligned	1	intron_retention_8113	FBXO2	ENSG00000116661.9	chr1 | -	IR	11709584:11709931-11709931:11710022-11710022:11710131	11709584:11710131	0.977	0.1737	1	0.462
KICH	TCGA-KN-8435-11A-01R-2315-07.7e49cf6c-9feb-43a9-a123-917cd38e4f1d.aligned	1	intron_retention_8113	FBXO2	ENSG00000116661.9	chr1 | -	IR	11709584:11709931-11709931:11710022-11710022:11710131	11709584:11710131	0.977	0.1737	1	0.462
KICH	TCGA-KN-8436-01A-11R-2315-07.034d17f6-d3ef-474c-867a-2fa51eab60f2.aligned	1	intron_retention_8113	FBXO2	ENSG00000116661.9	chr1 | -	IR	11709584:11709931-11709931:11710022-11710022:11710131	11709584:11710131	0.977	0.1737	1	0.462
KICH	TCGA-KN-8436-11A-01R-2315-07.15c869eb-856e-4dda-9efd-4a4252b33464.aligned	0.637	intron_retention_8113	FBXO2	ENSG00000116661.9	chr1 | -	IR	11709584:11709931-11709931:11710022-11710022:11710131	11709584:11710131	0.977	0.1737	1	0.462
KICH	TCGA-KN-8437-01A-11R-2315-07.9e634d59-f421-4a8c-b840-21fd612de48f.aligned	0.627	intron_retention_8113	FBXO2	ENSG00000116661.9	chr1 | -	IR	11709584:11709931-11709931:11710022-11710022:11710131	11709584:11710131	0.977	0.1737	1	0.462
KICH	TCGA-KN-8437-11A-01R-2315-07.070ff02a-0851-4538-939c-01507b152e26.aligned	1	intron_retention_8113	FBXO2	ENSG00000116661.9	chr1 | -	IR	11709584:11709931-11709931:11710022-11710022:11710131	11709584:11710131	0.977	0.1737	1	0.462
KICH	TCGA-KO-8403-01A-11R-2315-07.362473ea-d151-4a1b-8ba7-66a3634dca7b.aligned	1	intron_retention_8113	FBXO2	ENSG00000116661.9	chr1 | -	IR	11709584:11709931-11709931:11710022-11710022:11710131	11709584:11710131	0.977	0.1737	1	0.462
KICH	TCGA-KO-8403-11A-01R-2315-07.bfaa88c7-f004-411b-9b5d-23edf91e758b.aligned	0.662	intron_retention_8113	FBXO2	ENSG00000116661.9	chr1 | -	IR	11709584:11709931-11709931:11710022-11710022:11710131	11709584:11710131	0.977	0.1737	1	0.462
KICH	TCGA-KO-8404-01A-11R-2315-07.d06c82c3-9575-4d5d-8796-7b4a6323f881.aligned		intron_retention_8113	FBXO2	ENSG00000116661.9	chr1 | -	IR	11709584:11709931-11709931:11710022-11710022:11710131	11709584:11710131	0.977	0.1737	1	0.462
KICH	TCGA-KO-8405-01A-11R-2315-07.f6e81351-3d0e-4a4b-aec4-e88011e8f3f9.aligned	1	intron_retention_8113	FBXO2	ENSG00000116661.9	chr1 | -	IR	11709584:11709931-11709931:11710022-11710022:11710131	11709584:11710131	0.977	0.1737	1	0.462
KICH	TCGA-KO-8406-01A-11R-2315-07.d324b289-764c-46e0-8aa3-8d10f6a8c495.aligned	1	intron_retention_8113	FBXO2	ENSG00000116661.9	chr1 | -	IR	11709584:11709931-11709931:11710022-11710022:11710131	11709584:11710131	0.977	0.1737	1	0.462
KICH	TCGA-KO-8407-01A-11R-2315-07.c30a6cac-b8c1-490a-b897-bbf35dcf0cbc.aligned	1	intron_retention_8113	FBXO2	ENSG00000116661.9	chr1 | -	IR	11709584:11709931-11709931:11710022-11710022:11710131	11709584:11710131	0.977	0.1737	1	0.462
KICH	TCGA-KO-8408-01A-11R-2315-07.3405fefa-29da-429f-9cac-01e07abcfedc.aligned	1	intron_retention_8113	FBXO2	ENSG00000116661.9	chr1 | -	IR	11709584:11709931-11709931:11710022-11710022:11710131	11709584:11710131	0.977	0.1737	1	0.462
KICH	TCGA-KO-8409-01A-11R-2315-07.a805252c-7dca-4e09-9bfa-ded6b5213c2b.aligned	1	intron_retention_8113	FBXO2	ENSG00000116661.9	chr1 | -	IR	11709584:11709931-11709931:11710022-11710022:11710131	11709584:11710131	0.977	0.1737	1	0.462
KICH	TCGA-KO-8410-01A-11R-2315-07.16af7da5-68af-4af9-9a2b-66241dfa4d84.aligned	1	intron_retention_8113	FBXO2	ENSG00000116661.9	chr1 | -	IR	11709584:11709931-11709931:11710022-11710022:11710131	11709584:11710131	0.977	0.1737	1	0.462
KICH	TCGA-KO-8411-01A-11R-2315-07.d4d86182-64cd-4b99-91ee-b41b57de112f.aligned	1	intron_retention_8113	FBXO2	ENSG00000116661.9	chr1 | -	IR	11709584:11709931-11709931:11710022-11710022:11710131	11709584:11710131	0.977	0.1737	1	0.462
KICH	TCGA-KO-8413-01A-11R-2315-07.4c416913-332a-47e4-bb98-94927c050db4.aligned	1	intron_retention_8113	FBXO2	ENSG00000116661.9	chr1 | -	IR	11709584:11709931-11709931:11710022-11710022:11710131	11709584:11710131	0.977	0.1737	1	0.462
KICH	TCGA-KO-8414-01A-11R-2315-07.42ac5002-fdad-426e-9037-e5cc99d093eb.aligned	0.655	intron_retention_8113	FBXO2	ENSG00000116661.9	chr1 | -	IR	11709584:11709931-11709931:11710022-11710022:11710131	11709584:11710131	0.977	0.1737	1	0.462
KICH	TCGA-KO-8415-01A-11R-2315-07.5ee3613b-e8d8-44fb-a17b-1d5e59ed5fb8.aligned	0.663	intron_retention_8113	FBXO2	ENSG00000116661.9	chr1 | -	IR	11709584:11709931-11709931:11710022-11710022:11710131	11709584:11710131	0.977	0.1737	1	0.462
KICH	TCGA-KO-8415-11A-01R-2315-07.e887731b-227e-458c-9a91-375ff7a91de1.aligned	1	intron_retention_8113	FBXO2	ENSG00000116661.9	chr1 | -	IR	11709584:11709931-11709931:11710022-11710022:11710131	11709584:11710131	0.977	0.1737	1	0.462
KICH	TCGA-KO-8416-01A-11R-2315-07.9d5d8b6b-f214-4549-92d9-4ac85f21d25e.aligned	0.712	intron_retention_8113	FBXO2	ENSG00000116661.9	chr1 | -	IR	11709584:11709931-11709931:11710022-11710022:11710131	11709584:11710131	0.977	0.1737	1	0.462
KICH	TCGA-KO-8417-01A-11R-2315-07.6ec3effa-f0dd-4fae-90d3-c7a90a8e5041.aligned	1	intron_retention_8113	FBXO2	ENSG00000116661.9	chr1 | -	IR	11709584:11709931-11709931:11710022-11710022:11710131	11709584:11710131	0.977	0.1737	1	0.462
KIRP	TCGA-2K-A9WE-01A-11R-A38C-07.e5c5e3a7-7cca-4c65-b10d-17cc2a2a0291.aligned	1	intron_retention_8113	FBXO2	ENSG00000116661.9	chr1 | -	IR	11709584:11709931-11709931:11710022-11710022:11710131	11709584:11710131	0.48	0.1582	1	0.474
KIRP	TCGA-2Z-A9J1-01A-11R-A38C-07.76894c83-5e3a-4d7c-b3e9-f7ef57e724a8.aligned	1	intron_retention_8113	FBXO2	ENSG00000116661.9	chr1 | -	IR	11709584:11709931-11709931:11710022-11710022:11710131	11709584:11710131	0.48	0.1582	1	0.474
KIRP	TCGA-2Z-A9J2-01A-11R-A38C-07.59d6c567-d73c-4572-ae55-385b9f0ed8bf.aligned		intron_retention_8113	FBXO2	ENSG00000116661.9	chr1 | -	IR	11709584:11709931-11709931:11710022-11710022:11710131	11709584:11710131	0.48	0.1582	1	0.474
KIRP	TCGA-2Z-A9J3-01A-12R-A38C-07.86e691fc-c29d-402d-a393-8930a4f3fad9.aligned	1	intron_retention_8113	FBXO2	ENSG00000116661.9	chr1 | -	IR	11709584:11709931-11709931:11710022-11710022:11710131	11709584:11710131	0.48	0.1582	1	0.474
KIRP	TCGA-2Z-A9J5-01A-21R-A38C-07.9ce93e24-974d-4a90-82b7-9efdf3c61085.aligned	1	intron_retention_8113	FBXO2	ENSG00000116661.9	chr1 | -	IR	11709584:11709931-11709931:11710022-11710022:11710131	11709584:11710131	0.48	0.1582	1	0.474
KIRP	TCGA-2Z-A9J6-01A-11R-A38C-07.ff70a8ae-3e2c-4d42-a3f0-d3c92472232a.aligned		intron_retention_8113	FBXO2	ENSG00000116661.9	chr1 | -	IR	11709584:11709931-11709931:11710022-11710022:11710131	11709584:11710131	0.48	0.1582	1	0.474
KIRP	TCGA-2Z-A9J7-01A-11R-A38C-07.d10a636b-9077-4863-b993-4d5bddd549eb.aligned	1	intron_retention_8113	FBXO2	ENSG00000116661.9	chr1 | -	IR	11709584:11709931-11709931:11710022-11710022:11710131	11709584:11710131	0.48	0.1582	1	0.474
KIRP	TCGA-2Z-A9J8-01A-11R-A42S-07.bde7f675-08a0-443c-83e6-0f8662456c1c.aligned	1	intron_retention_8113	FBXO2	ENSG00000116661.9	chr1 | -	IR	11709584:11709931-11709931:11710022-11710022:11710131	11709584:11710131	0.48	0.1582	1	0.474
KIRP	TCGA-2Z-A9J9-01A-11R-A42S-07.cfca77a9-fcfb-4ab5-b969-2ae55a0cbd32.aligned	0.694	intron_retention_8113	FBXO2	ENSG00000116661.9	chr1 | -	IR	11709584:11709931-11709931:11710022-11710022:11710131	11709584:11710131	0.48	0.1582	1	0.474
KIRP	TCGA-2Z-A9JD-01A-11R-A42S-07.5cf30542-0745-4cd5-9193-14ef995218b9.aligned		intron_retention_8113	FBXO2	ENSG00000116661.9	chr1 | -	IR	11709584:11709931-11709931:11710022-11710022:11710131	11709584:11710131	0.48	0.1582	1	0.474
KIRP	TCGA-2Z-A9JE-01A-11R-A42S-07.8cb0181b-4602-40d7-afe9-762f7bc98b04.aligned		intron_retention_8113	FBXO2	ENSG00000116661.9	chr1 | -	IR	11709584:11709931-11709931:11710022-11710022:11710131	11709584:11710131	0.48	0.1582	1	0.474
KIRP	TCGA-2Z-A9JG-01A-11R-A42S-07.9e197f2d-f9bc-4f6e-9f7d-03c69843e6ed.aligned		intron_retention_8113	FBXO2	ENSG00000116661.9	chr1 | -	IR	11709584:11709931-11709931:11710022-11710022:11710131	11709584:11710131	0.48	0.1582	1	0.474
KIRP	TCGA-2Z-A9JI-01A-11R-A42S-07.be2d78df-da0f-483a-b367-dd5271a65cac.aligned		intron_retention_8113	FBXO2	ENSG00000116661.9	chr1 | -	IR	11709584:11709931-11709931:11710022-11710022:11710131	11709584:11710131	0.48	0.1582	1	0.474
KIRP	TCGA-2Z-A9JJ-01A-11R-A42S-07.37f12172-be7e-4f7d-8095-d3fc1ec7dd7d.aligned	1	intron_retention_8113	FBXO2	ENSG00000116661.9	chr1 | -	IR	11709584:11709931-11709931:11710022-11710022:11710131	11709584:11710131	0.48	0.1582	1	0.474
KIRP	TCGA-2Z-A9JK-01A-11R-A42S-07.3e456ea9-e28d-4977-8c8c-5b5b8fffbb03.aligned	0.721	intron_retention_8113	FBXO2	ENSG00000116661.9	chr1 | -	IR	11709584:11709931-11709931:11710022-11710022:11710131	11709584:11710131	0.48	0.1582	1	0.474
KIRP	TCGA-2Z-A9JL-01A-11R-A42S-07.0a0d8685-150d-4c74-9223-d56776efecee.aligned		intron_retention_8113	FBXO2	ENSG00000116661.9	chr1 | -	IR	11709584:11709931-11709931:11710022-11710022:11710131	11709584:11710131	0.48	0.1582	1	0.474
KIRP	TCGA-2Z-A9JM-01A-12R-A42S-07.1fcbdbc8-c470-44be-8984-9a4e7eff50e4.aligned		intron_retention_8113	FBXO2	ENSG00000116661.9	chr1 | -	IR	11709584:11709931-11709931:11710022-11710022:11710131	11709584:11710131	0.48	0.1582	1	0.474
KIRP	TCGA-2Z-A9JN-01A-21R-A42S-07.e029ee59-8d15-46e6-915a-f343ec846db6.aligned	1	intron_retention_8113	FBXO2	ENSG00000116661.9	chr1 | -	IR	11709584:11709931-11709931:11710022-11710022:11710131	11709584:11710131	0.48	0.1582	1	0.474
KIRP	TCGA-2Z-A9JO-01A-11R-A42S-07.84675636-1d8c-474a-a4bf-baffcc36b5bf.aligned	1	intron_retention_8113	FBXO2	ENSG00000116661.9	chr1 | -	IR	11709584:11709931-11709931:11710022-11710022:11710131	11709584:11710131	0.48	0.1582	1	0.474
KIRP	TCGA-2Z-A9JP-01A-11R-A42S-07.88c52e7b-77ac-4c7b-9c3c-0be2135811a2.aligned		intron_retention_8113	FBXO2	ENSG00000116661.9	chr1 | -	IR	11709584:11709931-11709931:11710022-11710022:11710131	11709584:11710131	0.48	0.1582	1	0.474
KIRP	TCGA-2Z-A9JR-01A-12R-A42S-07.0053d506-ce66-4635-b648-be234c7c0708.aligned		intron_retention_8113	FBXO2	ENSG00000116661.9	chr1 | -	IR	11709584:11709931-11709931:11710022-11710022:11710131	11709584:11710131	0.48	0.1582	1	0.474
KIRP	TCGA-2Z-A9JS-01A-21R-A42S-07.245893ad-f1c2-46ba-a485-3947e8d1c78f.aligned	0.572	intron_retention_8113	FBXO2	ENSG00000116661.9	chr1 | -	IR	11709584:11709931-11709931:11710022-11710022:11710131	11709584:11710131	0.48	0.1582	1	0.474
KIRP	TCGA-4A-A93W-01A-11R-A37K-07.49b464ce-dcf8-42fb-89df-1809f005e00f.aligned	0.62	intron_retention_8113	FBXO2	ENSG00000116661.9	chr1 | -	IR	11709584:11709931-11709931:11710022-11710022:11710131	11709584:11710131	0.48	0.1582	1	0.474
KIRP	TCGA-4A-A93X-01A-11R-A37K-07.ec5b3c38-d7ae-4064-bd16-f1d1a8f91482.aligned		intron_retention_8113	FBXO2	ENSG00000116661.9	chr1 | -	IR	11709584:11709931-11709931:11710022-11710022:11710131	11709584:11710131	0.48	0.1582	1	0.474
KIRP	TCGA-4A-A93Y-01A-11R-A37K-07.9222dfe0-27c4-42cb-8e62-43e6e5a0ada8.aligned		intron_retention_8113	FBXO2	ENSG00000116661.9	chr1 | -	IR	11709584:11709931-11709931:11710022-11710022:11710131	11709584:11710131	0.48	0.1582	1	0.474
KIRP	TCGA-5P-A9JU-01A-11R-A42S-07.ce7a30a8-468f-4a5e-a573-f2cf273bcd28.aligned		intron_retention_8113	FBXO2	ENSG00000116661.9	chr1 | -	IR	11709584:11709931-11709931:11710022-11710022:11710131	11709584:11710131	0.48	0.1582	1	0.474
KIRP	TCGA-5P-A9JV-01A-12R-A42S-07.876df203-5f12-4165-a747-f2bece2b95cd.aligned		intron_retention_8113	FBXO2	ENSG00000116661.9	chr1 | -	IR	11709584:11709931-11709931:11710022-11710022:11710131	11709584:11710131	0.48	0.1582	1	0.474
KIRP	TCGA-5P-A9JY-01A-11R-A42S-07.30ed88e3-55ce-45de-bcec-b6ed37297cc5.aligned		intron_retention_8113	FBXO2	ENSG00000116661.9	chr1 | -	IR	11709584:11709931-11709931:11710022-11710022:11710131	11709584:11710131	0.48	0.1582	1	0.474
KIRP	TCGA-5P-A9JZ-01A-11R-A42S-07.8cc42683-2d39-4536-a797-28c4a731dc0a.aligned		intron_retention_8113	FBXO2	ENSG00000116661.9	chr1 | -	IR	11709584:11709931-11709931:11710022-11710022:11710131	11709584:11710131	0.48	0.1582	1	0.474
KIRP	TCGA-5P-A9K0-01A-11R-A42S-07.fc1359a0-6ebb-4b99-983d-53b4343e43d2.aligned		intron_retention_8113	FBXO2	ENSG00000116661.9	chr1 | -	IR	11709584:11709931-11709931:11710022-11710022:11710131	11709584:11710131	0.48	0.1582	1	0.474
KIRP	TCGA-5P-A9K3-01A-11R-A42S-07.5f66ae56-8f05-412a-8c47-0e7012849f64.aligned		intron_retention_8113	FBXO2	ENSG00000116661.9	chr1 | -	IR	11709584:11709931-11709931:11710022-11710022:11710131	11709584:11710131	0.48	0.1582	1	0.474
KIRP	TCGA-5P-A9K4-01A-11R-A42S-07.d9904f57-fde7-48bc-8c96-484d51017ff0.aligned	0.65	intron_retention_8113	FBXO2	ENSG00000116661.9	chr1 | -	IR	11709584:11709931-11709931:11710022-11710022:11710131	11709584:11710131	0.48	0.1582	1	0.474
KIRP	TCGA-5P-A9K6-01A-11R-A42S-07.6d8543de-7181-421d-a70c-d9764536278a.aligned	1	intron_retention_8113	FBXO2	ENSG00000116661.9	chr1 | -	IR	11709584:11709931-11709931:11710022-11710022:11710131	11709584:11710131	0.48	0.1582	1	0.474
KIRP	TCGA-5P-A9K8-01A-11R-A42S-07.d0e4a389-468c-4ebf-a7ef-553536912652.aligned	0.655	intron_retention_8113	FBXO2	ENSG00000116661.9	chr1 | -	IR	11709584:11709931-11709931:11710022-11710022:11710131	11709584:11710131	0.48	0.1582	1	0.474
KIRP	TCGA-5P-A9K9-01A-11R-A42S-07.31766e6a-4527-4be0-9496-3ec7e2acb2a0.aligned		intron_retention_8113	FBXO2	ENSG00000116661.9	chr1 | -	IR	11709584:11709931-11709931:11710022-11710022:11710131	11709584:11710131	0.48	0.1582	1	0.474
KIRP	TCGA-5P-A9KA-01A-11R-A42S-07.c429f494-4771-463c-9d7a-0d5e8e0220fb.aligned		intron_retention_8113	FBXO2	ENSG00000116661.9	chr1 | -	IR	11709584:11709931-11709931:11710022-11710022:11710131	11709584:11710131	0.48	0.1582	1	0.474
KIRP	TCGA-5P-A9KC-01A-11R-A42S-07.b3effe15-e80e-4e10-92e9-d0def1e53aaf.aligned	0.627	intron_retention_8113	FBXO2	ENSG00000116661.9	chr1 | -	IR	11709584:11709931-11709931:11710022-11710022:11710131	11709584:11710131	0.48	0.1582	1	0.474
KIRP	TCGA-5P-A9KE-01A-11R-A42S-07.edc22a5d-6565-4138-b4bd-9553325de48d.aligned		intron_retention_8113	FBXO2	ENSG00000116661.9	chr1 | -	IR	11709584:11709931-11709931:11710022-11710022:11710131	11709584:11710131	0.48	0.1582	1	0.474
KIRP	TCGA-5P-A9KF-01A-11R-A42S-07.9d711f74-d1e7-49cc-9482-42ff86c214ba.aligned	1	intron_retention_8113	FBXO2	ENSG00000116661.9	chr1 | -	IR	11709584:11709931-11709931:11710022-11710022:11710131	11709584:11710131	0.48	0.1582	1	0.474
KIRP	TCGA-5P-A9KH-01A-11R-A42S-07.fade0b33-a012-4897-b35a-c37d7ce0f1b6.aligned	0.569	intron_retention_8113	FBXO2	ENSG00000116661.9	chr1 | -	IR	11709584:11709931-11709931:11710022-11710022:11710131	11709584:11710131	0.48	0.1582	1	0.474
KIRP	TCGA-A4-7286-01A-11R-A32Z-07.da4715ac-6d8c-485e-84d1-ecc11b685878.aligned		intron_retention_8113	FBXO2	ENSG00000116661.9	chr1 | -	IR	11709584:11709931-11709931:11710022-11710022:11710131	11709584:11710131	0.48	0.1582	1	0.474
KIRP	TCGA-A4-7287-01A-11R-2139-07.bd08e09d-7e95-40d6-ad89-30da191436dc.aligned		intron_retention_8113	FBXO2	ENSG00000116661.9	chr1 | -	IR	11709584:11709931-11709931:11710022-11710022:11710131	11709584:11710131	0.48	0.1582	1	0.474
KIRP	TCGA-A4-7288-01A-11R-A32Z-07.e8f06567-7853-4e8c-a844-b27c7ac87327.aligned		intron_retention_8113	FBXO2	ENSG00000116661.9	chr1 | -	IR	11709584:11709931-11709931:11710022-11710022:11710131	11709584:11710131	0.48	0.1582	1	0.474
KIRP	TCGA-A4-7583-01A-11R-A32Z-07.108c3fda-c681-4030-8a51-c21b0108b78e.aligned	1	intron_retention_8113	FBXO2	ENSG00000116661.9	chr1 | -	IR	11709584:11709931-11709931:11710022-11710022:11710131	11709584:11710131	0.48	0.1582	1	0.474
KIRP	TCGA-A4-7584-01A-11R-2139-07.d4c11d19-2467-4cb5-a351-d409cb3deea4.aligned	1	intron_retention_8113	FBXO2	ENSG00000116661.9	chr1 | -	IR	11709584:11709931-11709931:11710022-11710022:11710131	11709584:11710131	0.48	0.1582	1	0.474
KIRP	TCGA-A4-7585-01A-11R-2139-07.758c51d4-1ece-4434-976e-50813e9076aa.aligned		intron_retention_8113	FBXO2	ENSG00000116661.9	chr1 | -	IR	11709584:11709931-11709931:11710022-11710022:11710131	11709584:11710131	0.48	0.1582	1	0.474
KIRP	TCGA-A4-7732-01A-11R-2139-07.6ea88cea-a580-4060-854f-94d30936401a.aligned		intron_retention_8113	FBXO2	ENSG00000116661.9	chr1 | -	IR	11709584:11709931-11709931:11710022-11710022:11710131	11709584:11710131	0.48	0.1582	1	0.474
KIRP	TCGA-A4-7734-01A-11R-A32Z-07.323b6c3b-a058-4bea-a4fa-38752f26ca6c.aligned	1	intron_retention_8113	FBXO2	ENSG00000116661.9	chr1 | -	IR	11709584:11709931-11709931:11710022-11710022:11710131	11709584:11710131	0.48	0.1582	1	0.474
KIRP	TCGA-A4-7828-01A-11R-2139-07.c11fcc21-6f21-440a-9b48-90a68efea23b.aligned		intron_retention_8113	FBXO2	ENSG00000116661.9	chr1 | -	IR	11709584:11709931-11709931:11710022-11710022:11710131	11709584:11710131	0.48	0.1582	1	0.474
KIRP	TCGA-A4-7915-01A-11R-2204-07.a68fcab2-7832-443a-b051-ae753aced3a8.aligned		intron_retention_8113	FBXO2	ENSG00000116661.9	chr1 | -	IR	11709584:11709931-11709931:11710022-11710022:11710131	11709584:11710131	0.48	0.1582	1	0.474
KIRP	TCGA-A4-7996-01A-11R-2204-07.5cfe15b6-13b5-426b-ab95-9a6bafd56819.aligned		intron_retention_8113	FBXO2	ENSG00000116661.9	chr1 | -	IR	11709584:11709931-11709931:11710022-11710022:11710131	11709584:11710131	0.48	0.1582	1	0.474
KIRP	TCGA-A4-7997-01A-11R-2204-07.d299b4ed-2ebf-4c53-9d3b-aa5f6eaae646.aligned	1	intron_retention_8113	FBXO2	ENSG00000116661.9	chr1 | -	IR	11709584:11709931-11709931:11710022-11710022:11710131	11709584:11710131	0.48	0.1582	1	0.474
KIRP	TCGA-A4-8098-01A-11R-2404-07.ec9e49c6-62d8-4248-85cc-e66c225db177.aligned	1	intron_retention_8113	FBXO2	ENSG00000116661.9	chr1 | -	IR	11709584:11709931-11709931:11710022-11710022:11710131	11709584:11710131	0.48	0.1582	1	0.474
KIRP	TCGA-A4-8310-01A-11R-2404-07.895821cf-345d-4324-b9e6-cee2c4443f1a.aligned		intron_retention_8113	FBXO2	ENSG00000116661.9	chr1 | -	IR	11709584:11709931-11709931:11710022-11710022:11710131	11709584:11710131	0.48	0.1582	1	0.474
KIRP	TCGA-A4-8311-01A-11R-2404-07.dd3850ef-1108-42e1-8b1e-5e4e57916579.aligned	1	intron_retention_8113	FBXO2	ENSG00000116661.9	chr1 | -	IR	11709584:11709931-11709931:11710022-11710022:11710131	11709584:11710131	0.48	0.1582	1	0.474
KIRP	TCGA-A4-8312-01A-11R-2404-07.e856ffa7-8d75-45a4-9d72-a3a576fa7dd1.aligned	1	intron_retention_8113	FBXO2	ENSG00000116661.9	chr1 | -	IR	11709584:11709931-11709931:11710022-11710022:11710131	11709584:11710131	0.48	0.1582	1	0.474
KIRP	TCGA-A4-8515-01A-11R-2404-07.72eed461-dcf0-4723-aa0f-88956341f6db.aligned	1	intron_retention_8113	FBXO2	ENSG00000116661.9	chr1 | -	IR	11709584:11709931-11709931:11710022-11710022:11710131	11709584:11710131	0.48	0.1582	1	0.474
KIRP	TCGA-A4-8516-01A-11R-2404-07.42cba207-2920-4301-bc2a-f97d32e80949.aligned		intron_retention_8113	FBXO2	ENSG00000116661.9	chr1 | -	IR	11709584:11709931-11709931:11710022-11710022:11710131	11709584:11710131	0.48	0.1582	1	0.474
KIRP	TCGA-A4-8517-01A-11R-2404-07.bb0bdc3d-a1c4-4a12-b126-5c43ee8b9162.aligned		intron_retention_8113	FBXO2	ENSG00000116661.9	chr1 | -	IR	11709584:11709931-11709931:11710022-11710022:11710131	11709584:11710131	0.48	0.1582	1	0.474
KIRP	TCGA-A4-8518-01A-11R-2404-07.7c895abd-3ee8-44ac-bc5d-894bf55a888a.aligned		intron_retention_8113	FBXO2	ENSG00000116661.9	chr1 | -	IR	11709584:11709931-11709931:11710022-11710022:11710131	11709584:11710131	0.48	0.1582	1	0.474
KIRP	TCGA-A4-8630-01A-11R-2404-07.59b6740e-5e20-4993-9a1e-9b2ef87e4ab6.aligned	1	intron_retention_8113	FBXO2	ENSG00000116661.9	chr1 | -	IR	11709584:11709931-11709931:11710022-11710022:11710131	11709584:11710131	0.48	0.1582	1	0.474
KIRP	TCGA-A4-A48D-01A-11R-A24Z-07.fae0aab4-41f6-4315-af1c-6d82c1106157.aligned	0.958	intron_retention_8113	FBXO2	ENSG00000116661.9	chr1 | -	IR	11709584:11709931-11709931:11710022-11710022:11710131	11709584:11710131	0.48	0.1582	1	0.474
KIRP	TCGA-A4-A4ZT-01A-11R-A26U-07.82d185c7-5587-4b10-b209-5238311570d4.aligned		intron_retention_8113	FBXO2	ENSG00000116661.9	chr1 | -	IR	11709584:11709931-11709931:11710022-11710022:11710131	11709584:11710131	0.48	0.1582	1	0.474
KIRP	TCGA-A4-A4ZT-11A-11R-A26U-07.449ad673-a2d6-4168-a33e-5fa3230052cd.aligned	1	intron_retention_8113	FBXO2	ENSG00000116661.9	chr1 | -	IR	11709584:11709931-11709931:11710022-11710022:11710131	11709584:11710131	0.48	0.1582	1	0.474
KIRP	TCGA-A4-A57E-01A-11R-A26U-07.7559d95d-0a25-497d-a5c9-e07dd95d80e8.aligned		intron_retention_8113	FBXO2	ENSG00000116661.9	chr1 | -	IR	11709584:11709931-11709931:11710022-11710022:11710131	11709584:11710131	0.48	0.1582	1	0.474
KIRP	TCGA-A4-A57E-11A-11R-A26U-07.02a8e571-141a-401d-95e3-06dc27a6bb0b.aligned	1	intron_retention_8113	FBXO2	ENSG00000116661.9	chr1 | -	IR	11709584:11709931-11709931:11710022-11710022:11710131	11709584:11710131	0.48	0.1582	1	0.474
KIRP	TCGA-A4-A5DU-01A-11R-A28H-07.495df33f-1359-4f56-bbf0-8f11ee8b7039.aligned		intron_retention_8113	FBXO2	ENSG00000116661.9	chr1 | -	IR	11709584:11709931-11709931:11710022-11710022:11710131	11709584:11710131	0.48	0.1582	1	0.474
KIRP	TCGA-A4-A5XZ-01A-11R-A31O-07.6d63f739-c10c-4d38-b7d8-fd40aa5c4b6f.aligned		intron_retention_8113	FBXO2	ENSG00000116661.9	chr1 | -	IR	11709584:11709931-11709931:11710022-11710022:11710131	11709584:11710131	0.48	0.1582	1	0.474
KIRP	TCGA-A4-A5Y0-01A-11R-A31O-07.5837b10d-8c02-4d07-9763-8a4f32e294fc.aligned		intron_retention_8113	FBXO2	ENSG00000116661.9	chr1 | -	IR	11709584:11709931-11709931:11710022-11710022:11710131	11709584:11710131	0.48	0.1582	1	0.474
KIRP	TCGA-A4-A5Y1-01A-11R-A28H-07.ed262c5b-6993-4bcf-a5f7-41c3866ddfc7.aligned		intron_retention_8113	FBXO2	ENSG00000116661.9	chr1 | -	IR	11709584:11709931-11709931:11710022-11710022:11710131	11709584:11710131	0.48	0.1582	1	0.474
KIRP	TCGA-A4-A772-01A-11R-A33Z-07.8250603f-860a-4d54-863b-50bafb9d5b3b.aligned	1	intron_retention_8113	FBXO2	ENSG00000116661.9	chr1 | -	IR	11709584:11709931-11709931:11710022-11710022:11710131	11709584:11710131	0.48	0.1582	1	0.474
KIRP	TCGA-A4-A7UZ-01A-12R-A355-07.c3cf3d4f-35f1-40ad-ab4b-2c4b9061d0cf.aligned	1	intron_retention_8113	FBXO2	ENSG00000116661.9	chr1 | -	IR	11709584:11709931-11709931:11710022-11710022:11710131	11709584:11710131	0.48	0.1582	1	0.474
KIRP	TCGA-AL-3466-01A-02R-1351-07.33fb74dc-e9cf-4cd1-b997-6e1b239fb9e4.aligned		intron_retention_8113	FBXO2	ENSG00000116661.9	chr1 | -	IR	11709584:11709931-11709931:11710022-11710022:11710131	11709584:11710131	0.48	0.1582	1	0.474
KIRP	TCGA-AL-3467-01A-02R-1351-07.69700b66-571f-4c02-b8bb-cc1790fe2b3d.aligned	1	intron_retention_8113	FBXO2	ENSG00000116661.9	chr1 | -	IR	11709584:11709931-11709931:11710022-11710022:11710131	11709584:11710131	0.48	0.1582	1	0.474
KIRP	TCGA-AL-3468-01A-02R-1351-07.257b1ca1-26d1-4888-8bc0-6b30d14d4509.aligned		intron_retention_8113	FBXO2	ENSG00000116661.9	chr1 | -	IR	11709584:11709931-11709931:11710022-11710022:11710131	11709584:11710131	0.48	0.1582	1	0.474
KIRP	TCGA-AL-3472-01A-01R-1193-07.278030c0-cf38-4aee-bdb2-b918f009a658.aligned		intron_retention_8113	FBXO2	ENSG00000116661.9	chr1 | -	IR	11709584:11709931-11709931:11710022-11710022:11710131	11709584:11710131	0.48	0.1582	1	0.474
KIRP	TCGA-AL-3473-01A-01R-1193-07.87a76195-5000-4976-8a5e-c2875cb9f486.aligned		intron_retention_8113	FBXO2	ENSG00000116661.9	chr1 | -	IR	11709584:11709931-11709931:11710022-11710022:11710131	11709584:11710131	0.48	0.1582	1	0.474
KIRP	TCGA-AL-7173-01A-11R-2139-07.9ee990f0-1982-4012-96d7-4495ab1f4e4b.aligned		intron_retention_8113	FBXO2	ENSG00000116661.9	chr1 | -	IR	11709584:11709931-11709931:11710022-11710022:11710131	11709584:11710131	0.48	0.1582	1	0.474
KIRP	TCGA-AT-A5NU-01A-11R-A28H-07.cd60a525-6c86-4107-8ced-fa2a5a5af0d5.aligned	1	intron_retention_8113	FBXO2	ENSG00000116661.9	chr1 | -	IR	11709584:11709931-11709931:11710022-11710022:11710131	11709584:11710131	0.48	0.1582	1	0.474
KIRP	TCGA-B1-5398-01A-02R-1592-07.01fb6e45-0552-4af8-8723-3631dada7a90.aligned	1	intron_retention_8113	FBXO2	ENSG00000116661.9	chr1 | -	IR	11709584:11709931-11709931:11710022-11710022:11710131	11709584:11710131	0.48	0.1582	1	0.474
KIRP	TCGA-B1-7332-01A-11R-A32Z-07.2ae61701-4a53-4f5f-be5c-7ff978b458b1.aligned		intron_retention_8113	FBXO2	ENSG00000116661.9	chr1 | -	IR	11709584:11709931-11709931:11710022-11710022:11710131	11709584:11710131	0.48	0.1582	1	0.474
KIRP	TCGA-B1-A47M-01A-11R-A24Z-07.a888330c-d169-457b-b888-34aaee3957d3.aligned	1	intron_retention_8113	FBXO2	ENSG00000116661.9	chr1 | -	IR	11709584:11709931-11709931:11710022-11710022:11710131	11709584:11710131	0.48	0.1582	1	0.474
KIRP	TCGA-B1-A47O-01A-11R-A24Z-07.183b8327-907e-41be-a0c8-94d4f0dbfa45.aligned		intron_retention_8113	FBXO2	ENSG00000116661.9	chr1 | -	IR	11709584:11709931-11709931:11710022-11710022:11710131	11709584:11710131	0.48	0.1582	1	0.474
KIRP	TCGA-B1-A655-01A-11R-A31O-07.978a0c93-bd16-46a9-abfa-3875885aa873.aligned		intron_retention_8113	FBXO2	ENSG00000116661.9	chr1 | -	IR	11709584:11709931-11709931:11710022-11710022:11710131	11709584:11710131	0.48	0.1582	1	0.474
KIRP	TCGA-B1-A656-01A-11R-A31O-07.dc85f8ca-afc0-4cb5-a776-44721d5dc128.aligned		intron_retention_8113	FBXO2	ENSG00000116661.9	chr1 | -	IR	11709584:11709931-11709931:11710022-11710022:11710131	11709584:11710131	0.48	0.1582	1	0.474
KIRP	TCGA-B1-A657-01A-11R-A31O-07.accfd874-53de-4771-91e0-55f09b02e597.aligned		intron_retention_8113	FBXO2	ENSG00000116661.9	chr1 | -	IR	11709584:11709931-11709931:11710022-11710022:11710131	11709584:11710131	0.48	0.1582	1	0.474
KIRP	TCGA-B3-3925-01A-02R-1351-07.9a505286-4aa4-4f56-b71e-ceddde413e52.aligned		intron_retention_8113	FBXO2	ENSG00000116661.9	chr1 | -	IR	11709584:11709931-11709931:11710022-11710022:11710131	11709584:11710131	0.48	0.1582	1	0.474
KIRP	TCGA-B3-3926-01A-02R-1351-07.449fb25f-4449-4817-b182-ff246b4ffafe.aligned	1	intron_retention_8113	FBXO2	ENSG00000116661.9	chr1 | -	IR	11709584:11709931-11709931:11710022-11710022:11710131	11709584:11710131	0.48	0.1582	1	0.474
KIRP	TCGA-B3-4103-01A-02R-1351-07.337214b1-e061-4789-a364-e894a74c4a6e.aligned	0.942	intron_retention_8113	FBXO2	ENSG00000116661.9	chr1 | -	IR	11709584:11709931-11709931:11710022-11710022:11710131	11709584:11710131	0.48	0.1582	1	0.474
KIRP	TCGA-B3-4104-01A-02R-1351-07.176143e0-adb3-4791-8075-2cbc16601cd5.aligned		intron_retention_8113	FBXO2	ENSG00000116661.9	chr1 | -	IR	11709584:11709931-11709931:11710022-11710022:11710131	11709584:11710131	0.48	0.1582	1	0.474
KIRP	TCGA-B3-8121-01A-21R-2404-07.e608cf6c-42d1-4562-b4c6-fe84fd69193c.aligned		intron_retention_8113	FBXO2	ENSG00000116661.9	chr1 | -	IR	11709584:11709931-11709931:11710022-11710022:11710131	11709584:11710131	0.48	0.1582	1	0.474
KIRP	TCGA-B3-A6W5-01A-12R-A33Z-07.5ee375f6-b40e-446c-b595-3436e27c73d4.aligned		intron_retention_8113	FBXO2	ENSG00000116661.9	chr1 | -	IR	11709584:11709931-11709931:11710022-11710022:11710131	11709584:11710131	0.48	0.1582	1	0.474
KIRP	TCGA-B9-4113-01A-01R-1193-07.92fed6cd-4439-4c1f-af25-97ed083b9499.aligned		intron_retention_8113	FBXO2	ENSG00000116661.9	chr1 | -	IR	11709584:11709931-11709931:11710022-11710022:11710131	11709584:11710131	0.48	0.1582	1	0.474
KIRP	TCGA-B9-4115-01A-01R-1193-07.e6235816-bce0-4daf-b1ee-3aade6592470.aligned		intron_retention_8113	FBXO2	ENSG00000116661.9	chr1 | -	IR	11709584:11709931-11709931:11710022-11710022:11710131	11709584:11710131	0.48	0.1582	1	0.474
KIRP	TCGA-B9-4115-11A-01R-1758-07.a9f38299-4624-4dc3-bc11-d91ffda21cb0.aligned	0.796	intron_retention_8113	FBXO2	ENSG00000116661.9	chr1 | -	IR	11709584:11709931-11709931:11710022-11710022:11710131	11709584:11710131	0.48	0.1582	1	0.474
KIRP	TCGA-B9-4116-01A-02R-1351-07.12ecf406-9bce-4813-84a5-46819c48265b.aligned		intron_retention_8113	FBXO2	ENSG00000116661.9	chr1 | -	IR	11709584:11709931-11709931:11710022-11710022:11710131	11709584:11710131	0.48	0.1582	1	0.474
KIRP	TCGA-B9-4117-01A-02R-1351-07.77144430-5eb5-4ac4-9e08-460911d9a614.aligned	1	intron_retention_8113	FBXO2	ENSG00000116661.9	chr1 | -	IR	11709584:11709931-11709931:11710022-11710022:11710131	11709584:11710131	0.48	0.1582	1	0.474
KIRP	TCGA-B9-4617-01A-01R-1193-07.d9d35aa6-5185-4da7-b794-6f0b07242b61.aligned		intron_retention_8113	FBXO2	ENSG00000116661.9	chr1 | -	IR	11709584:11709931-11709931:11710022-11710022:11710131	11709584:11710131	0.48	0.1582	1	0.474
KIRP	TCGA-B9-5155-01A-01R-1592-07.214d6150-1b21-4994-858a-09c917dc958b.aligned	1	intron_retention_8113	FBXO2	ENSG00000116661.9	chr1 | -	IR	11709584:11709931-11709931:11710022-11710022:11710131	11709584:11710131	0.48	0.1582	1	0.474
KIRP	TCGA-B9-5156-01A-01R-1592-07.598985df-5dac-49cf-869d-8ded7e8c88b5.aligned		intron_retention_8113	FBXO2	ENSG00000116661.9	chr1 | -	IR	11709584:11709931-11709931:11710022-11710022:11710131	11709584:11710131	0.48	0.1582	1	0.474
KIRP	TCGA-B9-7268-01A-11R-A32Z-07.2d5bb19c-0df7-499a-891d-f67e6b202820.aligned	1	intron_retention_8113	FBXO2	ENSG00000116661.9	chr1 | -	IR	11709584:11709931-11709931:11710022-11710022:11710131	11709584:11710131	0.48	0.1582	1	0.474
KIRP	TCGA-B9-A44B-01A-11R-A24Z-07.9e904de0-3768-4867-913a-1a95aef31105.aligned		intron_retention_8113	FBXO2	ENSG00000116661.9	chr1 | -	IR	11709584:11709931-11709931:11710022-11710022:11710131	11709584:11710131	0.48	0.1582	1	0.474
KIRP	TCGA-B9-A5W7-01A-11R-A31O-07.84dff8b1-e381-4f41-a05c-04524aca78b3.aligned		intron_retention_8113	FBXO2	ENSG00000116661.9	chr1 | -	IR	11709584:11709931-11709931:11710022-11710022:11710131	11709584:11710131	0.48	0.1582	1	0.474
KIRP	TCGA-B9-A5W8-01A-11R-A28H-07.e2a9aab4-6aa4-4609-a659-18de75283081.aligned		intron_retention_8113	FBXO2	ENSG00000116661.9	chr1 | -	IR	11709584:11709931-11709931:11710022-11710022:11710131	11709584:11710131	0.48	0.1582	1	0.474
KIRP	TCGA-B9-A5W9-01A-11R-A28H-07.76ba2e2d-7799-4a6c-8074-0320ad7196b6.aligned	0.767	intron_retention_8113	FBXO2	ENSG00000116661.9	chr1 | -	IR	11709584:11709931-11709931:11710022-11710022:11710131	11709584:11710131	0.48	0.1582	1	0.474
KIRP	TCGA-B9-A69E-01A-11R-A31O-07.56bdbf15-90b8-4caf-b948-986ed55533a9.aligned	1	intron_retention_8113	FBXO2	ENSG00000116661.9	chr1 | -	IR	11709584:11709931-11709931:11710022-11710022:11710131	11709584:11710131	0.48	0.1582	1	0.474
KIRP	TCGA-B9-A8YH-01A-11R-A37K-07.1b4be6ae-b4cd-4dcf-8c06-77328ba6e034.aligned		intron_retention_8113	FBXO2	ENSG00000116661.9	chr1 | -	IR	11709584:11709931-11709931:11710022-11710022:11710131	11709584:11710131	0.48	0.1582	1	0.474
KIRP	TCGA-B9-A8YI-01A-21R-A37K-07.11999c54-4086-4ed7-b193-2e0df2735239.aligned		intron_retention_8113	FBXO2	ENSG00000116661.9	chr1 | -	IR	11709584:11709931-11709931:11710022-11710022:11710131	11709584:11710131	0.48	0.1582	1	0.474
KIRP	TCGA-BQ-5875-01A-11R-1592-07.19eedffb-4311-4e50-9bf1-39bef9d2918c.aligned		intron_retention_8113	FBXO2	ENSG00000116661.9	chr1 | -	IR	11709584:11709931-11709931:11710022-11710022:11710131	11709584:11710131	0.48	0.1582	1	0.474
KIRP	TCGA-BQ-5875-11A-01R-1592-07.736e48e2-901c-441c-8336-d63e1451682e.aligned	0.823	intron_retention_8113	FBXO2	ENSG00000116661.9	chr1 | -	IR	11709584:11709931-11709931:11710022-11710022:11710131	11709584:11710131	0.48	0.1582	1	0.474
KIRP	TCGA-BQ-5876-01A-11R-1592-07.2f5e513a-8cda-4e87-ba97-845b78c8853f.aligned	1	intron_retention_8113	FBXO2	ENSG00000116661.9	chr1 | -	IR	11709584:11709931-11709931:11710022-11710022:11710131	11709584:11710131	0.48	0.1582	1	0.474
KIRP	TCGA-BQ-5877-01A-11R-1592-07.9ce68048-e231-4927-9e33-c057a897f929.aligned		intron_retention_8113	FBXO2	ENSG00000116661.9	chr1 | -	IR	11709584:11709931-11709931:11710022-11710022:11710131	11709584:11710131	0.48	0.1582	1	0.474
KIRP	TCGA-BQ-5877-11A-01R-1592-07.675ebba3-8b36-4c28-b6c2-9e22633ecceb.aligned	1	intron_retention_8113	FBXO2	ENSG00000116661.9	chr1 | -	IR	11709584:11709931-11709931:11710022-11710022:11710131	11709584:11710131	0.48	0.1582	1	0.474
KIRP	TCGA-BQ-5878-01A-11R-1592-07.f86950ae-1ac2-4794-83f1-541920a0b002.aligned	1	intron_retention_8113	FBXO2	ENSG00000116661.9	chr1 | -	IR	11709584:11709931-11709931:11710022-11710022:11710131	11709584:11710131	0.48	0.1582	1	0.474
KIRP	TCGA-BQ-5878-11A-01R-1592-07.d02d5b10-3d8e-4ecb-a644-b8fb547e6cf4.aligned	1	intron_retention_8113	FBXO2	ENSG00000116661.9	chr1 | -	IR	11709584:11709931-11709931:11710022-11710022:11710131	11709584:11710131	0.48	0.1582	1	0.474
KIRP	TCGA-BQ-5879-01A-11R-1592-07.ca847ef0-eec6-4781-81f4-8d6d08c33b68.aligned		intron_retention_8113	FBXO2	ENSG00000116661.9	chr1 | -	IR	11709584:11709931-11709931:11710022-11710022:11710131	11709584:11710131	0.48	0.1582	1	0.474
KIRP	TCGA-BQ-5879-11A-01R-1592-07.fc251d7a-291c-4244-a8e9-76471eddb4dc.aligned	1	intron_retention_8113	FBXO2	ENSG00000116661.9	chr1 | -	IR	11709584:11709931-11709931:11710022-11710022:11710131	11709584:11710131	0.48	0.1582	1	0.474
KIRP	TCGA-BQ-5880-01A-11R-1592-07.edb1e3a1-d48c-42cb-a0fd-87e956373585.aligned		intron_retention_8113	FBXO2	ENSG00000116661.9	chr1 | -	IR	11709584:11709931-11709931:11710022-11710022:11710131	11709584:11710131	0.48	0.1582	1	0.474
KIRP	TCGA-BQ-5881-01A-11R-1592-07.89a750e5-c923-4f77-a889-74cbe2e4bf60.aligned		intron_retention_8113	FBXO2	ENSG00000116661.9	chr1 | -	IR	11709584:11709931-11709931:11710022-11710022:11710131	11709584:11710131	0.48	0.1582	1	0.474
KIRP	TCGA-BQ-5882-01A-11R-1592-07.f2d8ec72-3f79-4cc4-9999-935bc74d7f72.aligned		intron_retention_8113	FBXO2	ENSG00000116661.9	chr1 | -	IR	11709584:11709931-11709931:11710022-11710022:11710131	11709584:11710131	0.48	0.1582	1	0.474
KIRP	TCGA-BQ-5882-11A-01R-1592-07.fdac9082-f772-4ea3-84f9-bb58ce79ea75.aligned	1	intron_retention_8113	FBXO2	ENSG00000116661.9	chr1 | -	IR	11709584:11709931-11709931:11710022-11710022:11710131	11709584:11710131	0.48	0.1582	1	0.474
KIRP	TCGA-BQ-5883-01A-11R-1592-07.cd06bdaa-b595-4ba5-a4d6-fad32e1f77de.aligned	0.608	intron_retention_8113	FBXO2	ENSG00000116661.9	chr1 | -	IR	11709584:11709931-11709931:11710022-11710022:11710131	11709584:11710131	0.48	0.1582	1	0.474
KIRP	TCGA-BQ-5884-01A-11R-1592-07.f42e83c8-9260-4cfd-a233-d96bc3dd2c20.aligned	1	intron_retention_8113	FBXO2	ENSG00000116661.9	chr1 | -	IR	11709584:11709931-11709931:11710022-11710022:11710131	11709584:11710131	0.48	0.1582	1	0.474
KIRP	TCGA-BQ-5884-11A-01R-1592-07.48540acb-3cf7-45a7-91dd-1fa2deccbe03.aligned		intron_retention_8113	FBXO2	ENSG00000116661.9	chr1 | -	IR	11709584:11709931-11709931:11710022-11710022:11710131	11709584:11710131	0.48	0.1582	1	0.474
KIRP	TCGA-BQ-5885-01A-11R-1592-07.da271fcc-72b4-442e-9ce2-c03b68947003.aligned		intron_retention_8113	FBXO2	ENSG00000116661.9	chr1 | -	IR	11709584:11709931-11709931:11710022-11710022:11710131	11709584:11710131	0.48	0.1582	1	0.474
KIRP	TCGA-BQ-5886-01A-11R-1592-07.c80f99bf-d66e-4d50-8185-24d133315d3d.aligned	1	intron_retention_8113	FBXO2	ENSG00000116661.9	chr1 | -	IR	11709584:11709931-11709931:11710022-11710022:11710131	11709584:11710131	0.48	0.1582	1	0.474
KIRP	TCGA-BQ-5887-01A-11R-1965-07.fd2fccb4-ea5c-4139-9dc3-25213f5345e4.aligned		intron_retention_8113	FBXO2	ENSG00000116661.9	chr1 | -	IR	11709584:11709931-11709931:11710022-11710022:11710131	11709584:11710131	0.48	0.1582	1	0.474
KIRP	TCGA-BQ-5887-11A-01R-1965-07.414c5291-4482-4e71-88df-a9b868cff950.aligned	1	intron_retention_8113	FBXO2	ENSG00000116661.9	chr1 | -	IR	11709584:11709931-11709931:11710022-11710022:11710131	11709584:11710131	0.48	0.1582	1	0.474
KIRP	TCGA-BQ-5888-01A-11R-1592-07.c5b44824-5b58-40eb-80a3-1604fefef04e.aligned	0.735	intron_retention_8113	FBXO2	ENSG00000116661.9	chr1 | -	IR	11709584:11709931-11709931:11710022-11710022:11710131	11709584:11710131	0.48	0.1582	1	0.474
KIRP	TCGA-BQ-5888-11A-01R-1592-07.2b5d833d-fd64-47a1-b90a-6a1eba839e1c.aligned	0.635	intron_retention_8113	FBXO2	ENSG00000116661.9	chr1 | -	IR	11709584:11709931-11709931:11710022-11710022:11710131	11709584:11710131	0.48	0.1582	1	0.474
KIRP	TCGA-BQ-5889-01A-11R-1592-07.e898c733-ab9c-4bc1-b46b-0fe8c5e663d0.aligned	1	intron_retention_8113	FBXO2	ENSG00000116661.9	chr1 | -	IR	11709584:11709931-11709931:11710022-11710022:11710131	11709584:11710131	0.48	0.1582	1	0.474
KIRP	TCGA-BQ-5890-01A-11R-1592-07.fa546225-ad76-4726-8900-17ea3904f7c1.aligned		intron_retention_8113	FBXO2	ENSG00000116661.9	chr1 | -	IR	11709584:11709931-11709931:11710022-11710022:11710131	11709584:11710131	0.48	0.1582	1	0.474
KIRP	TCGA-BQ-5890-11A-01R-1592-07.5f3c72b6-7e67-4c19-8782-5f4bd801210c.aligned	1	intron_retention_8113	FBXO2	ENSG00000116661.9	chr1 | -	IR	11709584:11709931-11709931:11710022-11710022:11710131	11709584:11710131	0.48	0.1582	1	0.474
KIRP	TCGA-BQ-5891-01A-11R-1592-07.403d9944-652b-4aa4-9669-dbdd319f4f39.aligned		intron_retention_8113	FBXO2	ENSG00000116661.9	chr1 | -	IR	11709584:11709931-11709931:11710022-11710022:11710131	11709584:11710131	0.48	0.1582	1	0.474
KIRP	TCGA-BQ-5891-11A-01R-1592-07.1547d054-019e-4387-94f3-da1f01dff4ba.aligned	1	intron_retention_8113	FBXO2	ENSG00000116661.9	chr1 | -	IR	11709584:11709931-11709931:11710022-11710022:11710131	11709584:11710131	0.48	0.1582	1	0.474
KIRP	TCGA-BQ-5892-01A-11R-1592-07.6cfad57a-8d1c-4819-8027-41a91469d193.aligned		intron_retention_8113	FBXO2	ENSG00000116661.9	chr1 | -	IR	11709584:11709931-11709931:11710022-11710022:11710131	11709584:11710131	0.48	0.1582	1	0.474
KIRP	TCGA-BQ-5893-01A-11R-1592-07.1fcad7a0-4e7b-47ec-a302-7b3fe1180060.aligned	0.625	intron_retention_8113	FBXO2	ENSG00000116661.9	chr1 | -	IR	11709584:11709931-11709931:11710022-11710022:11710131	11709584:11710131	0.48	0.1582	1	0.474
KIRP	TCGA-BQ-5894-01A-11R-1592-07.524f5e5e-2e33-491f-9b08-4320397e778b.aligned	1	intron_retention_8113	FBXO2	ENSG00000116661.9	chr1 | -	IR	11709584:11709931-11709931:11710022-11710022:11710131	11709584:11710131	0.48	0.1582	1	0.474
KIRP	TCGA-BQ-5894-11A-01R-1592-07.15c8af47-df6a-4cb5-a389-4ef6c2eb3501.aligned	1	intron_retention_8113	FBXO2	ENSG00000116661.9	chr1 | -	IR	11709584:11709931-11709931:11710022-11710022:11710131	11709584:11710131	0.48	0.1582	1	0.474
KIRP	TCGA-BQ-7044-01A-11R-1965-07.613d06d9-597d-4027-9978-2673b93b67d9.aligned		intron_retention_8113	FBXO2	ENSG00000116661.9	chr1 | -	IR	11709584:11709931-11709931:11710022-11710022:11710131	11709584:11710131	0.48	0.1582	1	0.474
KIRP	TCGA-BQ-7044-11A-01R-1965-07.69db99f3-ba66-4d76-9067-d3d09149d4a2.aligned	1	intron_retention_8113	FBXO2	ENSG00000116661.9	chr1 | -	IR	11709584:11709931-11709931:11710022-11710022:11710131	11709584:11710131	0.48	0.1582	1	0.474
KIRP	TCGA-BQ-7045-01A-31R-1965-07.0057e13d-5489-4c48-9772-9fd45db4d84f.aligned		intron_retention_8113	FBXO2	ENSG00000116661.9	chr1 | -	IR	11709584:11709931-11709931:11710022-11710022:11710131	11709584:11710131	0.48	0.1582	1	0.474
KIRP	TCGA-BQ-7045-11A-01R-1965-07.00b33fcb-61eb-4dba-991c-e9b2a9a70a51.aligned	1	intron_retention_8113	FBXO2	ENSG00000116661.9	chr1 | -	IR	11709584:11709931-11709931:11710022-11710022:11710131	11709584:11710131	0.48	0.1582	1	0.474
KIRP	TCGA-BQ-7046-01A-11R-1965-07.e836c0b0-a1c7-4db0-8785-6d3a9864f363.aligned		intron_retention_8113	FBXO2	ENSG00000116661.9	chr1 | -	IR	11709584:11709931-11709931:11710022-11710022:11710131	11709584:11710131	0.48	0.1582	1	0.474
KIRP	TCGA-BQ-7046-11A-01R-1965-07.6428af76-433c-4a0a-b295-b2a37d11d93a.aligned	0.615	intron_retention_8113	FBXO2	ENSG00000116661.9	chr1 | -	IR	11709584:11709931-11709931:11710022-11710022:11710131	11709584:11710131	0.48	0.1582	1	0.474
KIRP	TCGA-BQ-7048-01A-11R-1965-07.4b4f4cc6-011c-4ff3-a6a9-16f9cf99b4f1.aligned		intron_retention_8113	FBXO2	ENSG00000116661.9	chr1 | -	IR	11709584:11709931-11709931:11710022-11710022:11710131	11709584:11710131	0.48	0.1582	1	0.474
KIRP	TCGA-BQ-7049-01A-11R-1965-07.ee60d580-12aa-4bde-a42c-9a5ebc1834c0.aligned	1	intron_retention_8113	FBXO2	ENSG00000116661.9	chr1 | -	IR	11709584:11709931-11709931:11710022-11710022:11710131	11709584:11710131	0.48	0.1582	1	0.474
KIRP	TCGA-BQ-7050-01A-11R-1965-07.147d980f-bc6d-43ee-9454-4934ab161c07.aligned		intron_retention_8113	FBXO2	ENSG00000116661.9	chr1 | -	IR	11709584:11709931-11709931:11710022-11710022:11710131	11709584:11710131	0.48	0.1582	1	0.474
KIRP	TCGA-BQ-7051-01A-12R-1965-07.f3a29451-e125-4894-9d9a-c45d31e4d999.aligned		intron_retention_8113	FBXO2	ENSG00000116661.9	chr1 | -	IR	11709584:11709931-11709931:11710022-11710022:11710131	11709584:11710131	0.48	0.1582	1	0.474
KIRP	TCGA-BQ-7051-11A-02R-1965-07.d74355d5-c8f1-4657-ac5c-5f76a4e47467.aligned	1	intron_retention_8113	FBXO2	ENSG00000116661.9	chr1 | -	IR	11709584:11709931-11709931:11710022-11710022:11710131	11709584:11710131	0.48	0.1582	1	0.474
KIRP	TCGA-BQ-7053-01A-11R-1965-07.b598c4fd-14e6-476e-852a-83d396ec2d0f.aligned		intron_retention_8113	FBXO2	ENSG00000116661.9	chr1 | -	IR	11709584:11709931-11709931:11710022-11710022:11710131	11709584:11710131	0.48	0.1582	1	0.474
KIRP	TCGA-BQ-7055-01A-11R-1965-07.66d43b7a-411f-458c-b985-1802637bbb10.aligned		intron_retention_8113	FBXO2	ENSG00000116661.9	chr1 | -	IR	11709584:11709931-11709931:11710022-11710022:11710131	11709584:11710131	0.48	0.1582	1	0.474
KIRP	TCGA-BQ-7055-11A-01R-1965-07.7c2a68eb-25a5-4c78-929e-6331fda46ee6.aligned	1	intron_retention_8113	FBXO2	ENSG00000116661.9	chr1 | -	IR	11709584:11709931-11709931:11710022-11710022:11710131	11709584:11710131	0.48	0.1582	1	0.474
KIRP	TCGA-BQ-7056-01A-11R-1965-07.3caa0680-0883-4b8e-a92f-cdd6096688c5.aligned	1	intron_retention_8113	FBXO2	ENSG00000116661.9	chr1 | -	IR	11709584:11709931-11709931:11710022-11710022:11710131	11709584:11710131	0.48	0.1582	1	0.474
KIRP	TCGA-BQ-7058-01A-11R-1965-07.ffbb3fd8-1a6b-4a41-8a1c-69153ff2f054.aligned		intron_retention_8113	FBXO2	ENSG00000116661.9	chr1 | -	IR	11709584:11709931-11709931:11710022-11710022:11710131	11709584:11710131	0.48	0.1582	1	0.474
KIRP	TCGA-BQ-7059-01A-11R-1965-07.2f9bd820-0ddc-449a-b528-6e4ab823a39a.aligned		intron_retention_8113	FBXO2	ENSG00000116661.9	chr1 | -	IR	11709584:11709931-11709931:11710022-11710022:11710131	11709584:11710131	0.48	0.1582	1	0.474
KIRP	TCGA-BQ-7059-11A-01R-1965-07.74690cfa-ad39-4876-86cc-6b82062add1c.aligned	1	intron_retention_8113	FBXO2	ENSG00000116661.9	chr1 | -	IR	11709584:11709931-11709931:11710022-11710022:11710131	11709584:11710131	0.48	0.1582	1	0.474
KIRP	TCGA-BQ-7060-01A-11R-1965-07.5e09af58-8416-41da-8c99-91761f3e0bf1.aligned		intron_retention_8113	FBXO2	ENSG00000116661.9	chr1 | -	IR	11709584:11709931-11709931:11710022-11710022:11710131	11709584:11710131	0.48	0.1582	1	0.474
KIRP	TCGA-BQ-7061-01A-11R-1965-07.197d081a-c438-40f0-83ab-d2f5adaba583.aligned		intron_retention_8113	FBXO2	ENSG00000116661.9	chr1 | -	IR	11709584:11709931-11709931:11710022-11710022:11710131	11709584:11710131	0.48	0.1582	1	0.474
KIRP	TCGA-BQ-7061-11A-01R-1965-07.e22f47b8-5c7b-4b38-be5e-1d19f004b111.aligned	0.659	intron_retention_8113	FBXO2	ENSG00000116661.9	chr1 | -	IR	11709584:11709931-11709931:11710022-11710022:11710131	11709584:11710131	0.48	0.1582	1	0.474
KIRP	TCGA-BQ-7062-01A-11R-1965-07.0dfea89c-6c93-4a07-82db-598c8aa9d0d6.aligned	0.554	intron_retention_8113	FBXO2	ENSG00000116661.9	chr1 | -	IR	11709584:11709931-11709931:11710022-11710022:11710131	11709584:11710131	0.48	0.1582	1	0.474
KIRP	TCGA-DW-5560-01A-01R-1592-07.f47f3279-6265-4d85-89f2-d11501672ec0.aligned	1	intron_retention_8113	FBXO2	ENSG00000116661.9	chr1 | -	IR	11709584:11709931-11709931:11710022-11710022:11710131	11709584:11710131	0.48	0.1582	1	0.474
KIRP	TCGA-DW-5561-01A-01R-1592-07.0db9c1c6-7061-49d6-b60e-9f48b857299c.aligned		intron_retention_8113	FBXO2	ENSG00000116661.9	chr1 | -	IR	11709584:11709931-11709931:11710022-11710022:11710131	11709584:11710131	0.48	0.1582	1	0.474
KIRP	TCGA-DW-7834-01A-11R-2139-07.fa5377b9-8285-4101-8378-2dbe0820eaa2.aligned		intron_retention_8113	FBXO2	ENSG00000116661.9	chr1 | -	IR	11709584:11709931-11709931:11710022-11710022:11710131	11709584:11710131	0.48	0.1582	1	0.474
KIRP	TCGA-DW-7836-01A-11R-2139-07.18c3431e-1dfa-48d9-a207-3ef74d283426.aligned	0.644	intron_retention_8113	FBXO2	ENSG00000116661.9	chr1 | -	IR	11709584:11709931-11709931:11710022-11710022:11710131	11709584:11710131	0.48	0.1582	1	0.474
KIRP	TCGA-DW-7837-01A-11R-2139-07.d1078a27-57b4-42df-875d-4a2c38c63680.aligned		intron_retention_8113	FBXO2	ENSG00000116661.9	chr1 | -	IR	11709584:11709931-11709931:11710022-11710022:11710131	11709584:11710131	0.48	0.1582	1	0.474
KIRP	TCGA-DW-7838-01A-11R-2139-07.908f9d6f-e960-4f1d-b1c6-12c67812dc3c.aligned	1	intron_retention_8113	FBXO2	ENSG00000116661.9	chr1 | -	IR	11709584:11709931-11709931:11710022-11710022:11710131	11709584:11710131	0.48	0.1582	1	0.474
KIRP	TCGA-DW-7839-01A-11R-2139-07.c760d14b-62ee-45a6-b384-409c73ca63aa.aligned	1	intron_retention_8113	FBXO2	ENSG00000116661.9	chr1 | -	IR	11709584:11709931-11709931:11710022-11710022:11710131	11709584:11710131	0.48	0.1582	1	0.474
KIRP	TCGA-DW-7840-01A-11R-A32Z-07.fefca722-e97b-4371-98a8-a8b2f884370a.aligned		intron_retention_8113	FBXO2	ENSG00000116661.9	chr1 | -	IR	11709584:11709931-11709931:11710022-11710022:11710131	11709584:11710131	0.48	0.1582	1	0.474
KIRP	TCGA-DW-7841-01A-11R-A32Z-07.d21fb27d-34af-4386-a20d-d6a6eb891f9b.aligned		intron_retention_8113	FBXO2	ENSG00000116661.9	chr1 | -	IR	11709584:11709931-11709931:11710022-11710022:11710131	11709584:11710131	0.48	0.1582	1	0.474
KIRP	TCGA-DW-7842-01A-11R-A32Z-07.069ceb60-d007-4b57-a0b6-0ad05ba49dfa.aligned		intron_retention_8113	FBXO2	ENSG00000116661.9	chr1 | -	IR	11709584:11709931-11709931:11710022-11710022:11710131	11709584:11710131	0.48	0.1582	1	0.474
KIRP	TCGA-DW-7963-01B-11R-A28H-07.3865d65b-930c-4979-91c5-497b72d1b7a8.aligned		intron_retention_8113	FBXO2	ENSG00000116661.9	chr1 | -	IR	11709584:11709931-11709931:11710022-11710022:11710131	11709584:11710131	0.48	0.1582	1	0.474
KIRP	TCGA-DZ-6131-11A-01R-1965-07.4d5b1224-0569-4d67-b072-64b6185ec5cc.aligned	1	intron_retention_8113	FBXO2	ENSG00000116661.9	chr1 | -	IR	11709584:11709931-11709931:11710022-11710022:11710131	11709584:11710131	0.48	0.1582	1	0.474
KIRP	TCGA-DZ-6132-01A-11R-1965-07.09f4aed2-c85e-4e72-9e04-c6a2e02e5d76.aligned		intron_retention_8113	FBXO2	ENSG00000116661.9	chr1 | -	IR	11709584:11709931-11709931:11710022-11710022:11710131	11709584:11710131	0.48	0.1582	1	0.474
KIRP	TCGA-DZ-6132-11A-01R-1965-07.3ac3fcc8-857d-43f4-8038-8af00584373c.aligned	1	intron_retention_8113	FBXO2	ENSG00000116661.9	chr1 | -	IR	11709584:11709931-11709931:11710022-11710022:11710131	11709584:11710131	0.48	0.1582	1	0.474
KIRP	TCGA-DZ-6133-01A-11R-1965-07.db64f570-6041-468c-8639-f20cee05d331.aligned		intron_retention_8113	FBXO2	ENSG00000116661.9	chr1 | -	IR	11709584:11709931-11709931:11710022-11710022:11710131	11709584:11710131	0.48	0.1582	1	0.474
KIRP	TCGA-DZ-6133-11A-01R-1965-07.e5f5e07f-145b-437d-ab1c-c629b7afce27.aligned	1	intron_retention_8113	FBXO2	ENSG00000116661.9	chr1 | -	IR	11709584:11709931-11709931:11710022-11710022:11710131	11709584:11710131	0.48	0.1582	1	0.474
KIRP	TCGA-DZ-6134-01A-11R-1965-07.5ff01070-167d-43b6-bb87-88b2f82b99ba.aligned	1	intron_retention_8113	FBXO2	ENSG00000116661.9	chr1 | -	IR	11709584:11709931-11709931:11710022-11710022:11710131	11709584:11710131	0.48	0.1582	1	0.474
KIRP	TCGA-DZ-6134-11A-01R-1965-07.8c98ce69-de64-4774-a664-b5d1a924b0f3.aligned	1	intron_retention_8113	FBXO2	ENSG00000116661.9	chr1 | -	IR	11709584:11709931-11709931:11710022-11710022:11710131	11709584:11710131	0.48	0.1582	1	0.474
KIRP	TCGA-DZ-6135-01A-11R-1965-07.74513700-4bf3-478d-8f30-05c1d51ec246.aligned	1	intron_retention_8113	FBXO2	ENSG00000116661.9	chr1 | -	IR	11709584:11709931-11709931:11710022-11710022:11710131	11709584:11710131	0.48	0.1582	1	0.474
KIRP	TCGA-EV-5901-01A-11R-1592-07.6f708e1d-c6f7-4166-ac1f-0a686d95ae39.aligned	0.585	intron_retention_8113	FBXO2	ENSG00000116661.9	chr1 | -	IR	11709584:11709931-11709931:11710022-11710022:11710131	11709584:11710131	0.48	0.1582	1	0.474
KIRP	TCGA-EV-5902-01A-11R-1592-07.34555f18-e818-4ac7-92ee-72dd09cfb811.aligned	0.647	intron_retention_8113	FBXO2	ENSG00000116661.9	chr1 | -	IR	11709584:11709931-11709931:11710022-11710022:11710131	11709584:11710131	0.48	0.1582	1	0.474
KIRP	TCGA-EV-5903-01A-11R-1592-07.c6c8c326-92f3-4226-8816-43b257b3ec9f.aligned	0.68	intron_retention_8113	FBXO2	ENSG00000116661.9	chr1 | -	IR	11709584:11709931-11709931:11710022-11710022:11710131	11709584:11710131	0.48	0.1582	1	0.474
KIRP	TCGA-F9-A4JJ-01A-11R-A24Z-07.cb2d1ac9-521e-4d81-9032-ac13c3528da7.aligned	1	intron_retention_8113	FBXO2	ENSG00000116661.9	chr1 | -	IR	11709584:11709931-11709931:11710022-11710022:11710131	11709584:11710131	0.48	0.1582	1	0.474
KIRP	TCGA-F9-A7Q0-01A-11R-A36F-07.47bf8c2d-6142-4550-a854-162cdd2b7684.aligned	0.946	intron_retention_8113	FBXO2	ENSG00000116661.9	chr1 | -	IR	11709584:11709931-11709931:11710022-11710022:11710131	11709584:11710131	0.48	0.1582	1	0.474
KIRP	TCGA-F9-A8NY-01A-11R-A36F-07.4c50bac5-ad8d-4120-9d73-9fe8d78c9040.aligned		intron_retention_8113	FBXO2	ENSG00000116661.9	chr1 | -	IR	11709584:11709931-11709931:11710022-11710022:11710131	11709584:11710131	0.48	0.1582	1	0.474
KIRP	TCGA-F9-A97G-01A-11R-A38C-07.27d2d71b-457a-4673-aa7c-65198ef1308c.aligned	0.742	intron_retention_8113	FBXO2	ENSG00000116661.9	chr1 | -	IR	11709584:11709931-11709931:11710022-11710022:11710131	11709584:11710131	0.48	0.1582	1	0.474
KIRP	TCGA-G7-6789-01A-11R-1965-07.f2a2319f-6233-4a3a-bb2f-673cd9145686.aligned	1	intron_retention_8113	FBXO2	ENSG00000116661.9	chr1 | -	IR	11709584:11709931-11709931:11710022-11710022:11710131	11709584:11710131	0.48	0.1582	1	0.474
KIRP	TCGA-G7-6790-01A-11R-1965-07.12e60329-5243-46a0-a3ea-4d0a6e6b0392.aligned		intron_retention_8113	FBXO2	ENSG00000116661.9	chr1 | -	IR	11709584:11709931-11709931:11710022-11710022:11710131	11709584:11710131	0.48	0.1582	1	0.474
KIRP	TCGA-G7-6792-01A-21R-1965-07.2758bd10-87ca-498d-bc2e-0d5f92fdb634.aligned	1	intron_retention_8113	FBXO2	ENSG00000116661.9	chr1 | -	IR	11709584:11709931-11709931:11710022-11710022:11710131	11709584:11710131	0.48	0.1582	1	0.474
KIRP	TCGA-G7-6793-01A-11R-1965-07.ac1953f4-a6d8-40c8-9ba8-b5a38726c6e7.aligned	0.618	intron_retention_8113	FBXO2	ENSG00000116661.9	chr1 | -	IR	11709584:11709931-11709931:11710022-11710022:11710131	11709584:11710131	0.48	0.1582	1	0.474
KIRP	TCGA-G7-6796-01A-11R-1965-07.5dc4504a-2863-442e-a688-1cd7bd6404b8.aligned	1	intron_retention_8113	FBXO2	ENSG00000116661.9	chr1 | -	IR	11709584:11709931-11709931:11710022-11710022:11710131	11709584:11710131	0.48	0.1582	1	0.474
KIRP	TCGA-G7-6797-01A-11R-1965-07.fb13fe41-3e06-4d25-919f-95eb117ae14c.aligned	0.593	intron_retention_8113	FBXO2	ENSG00000116661.9	chr1 | -	IR	11709584:11709931-11709931:11710022-11710022:11710131	11709584:11710131	0.48	0.1582	1	0.474
KIRP	TCGA-G7-7501-01A-11R-2204-07.bd16fa1e-063c-41ab-a456-3ef2363fcda8.aligned		intron_retention_8113	FBXO2	ENSG00000116661.9	chr1 | -	IR	11709584:11709931-11709931:11710022-11710022:11710131	11709584:11710131	0.48	0.1582	1	0.474
KIRP	TCGA-G7-7502-01A-11R-2204-07.cb6abcbc-4b97-4754-99ed-c55bc211ef68.aligned	1	intron_retention_8113	FBXO2	ENSG00000116661.9	chr1 | -	IR	11709584:11709931-11709931:11710022-11710022:11710131	11709584:11710131	0.48	0.1582	1	0.474
[truncated: 6,996 more rows]
