# Supplementary material for: Comprehensive pan-cancer analysis reveals that FBXO2 as a potential therapeutic target associated with immune infiltration
Source: Research Square preprint supplement (doi:10.21203/rs.3.rs-8578038/v1), 2026-02-09
Supplement: Supplementary file 2 [file 7440122c651284f6f95e293f.docx]

## Comprehensive pan-cancer analysis reveals that FBXO2 as a potential

## therapeutic target associated with immune infiltration

Ming Wei1, Huilin Zang2, Qianqian Gao1, Yuan Zhang1, Jiexia Wen3, Yunhuan Gao1

1Department of Immunology, Nankai University School of Medicine; Nankai University, Tianjin 300071, P.R.China;

2 Tianjin Academy of Educational Sciences, Tianjin 300191, P.R.China;

3 State Key Laboratory of Metastable Materials Science and Technology, Yanshan University, Qinhuangdao, Hebei 066004, P.R.China

*Correspondence to*:Professor Yunhuan Gao, Department of Immunology, Nankai University School of Medicine; Nankai University, No. 94 Weijin Road, Nankai District, Tianjin 300071, P.R.China

E‑mail: gaoyunhuan@nankai.edu.cn

Or Dr Jiexia Wen, State Key Laboratory of Metastable Materials Science and Technology, Yanshan University, No. 438 Hebei Street, Haigang District, Qinhuangdao, Hebei 066004, P.R.China

E‑mail: wenjiexia2010@163.com

**
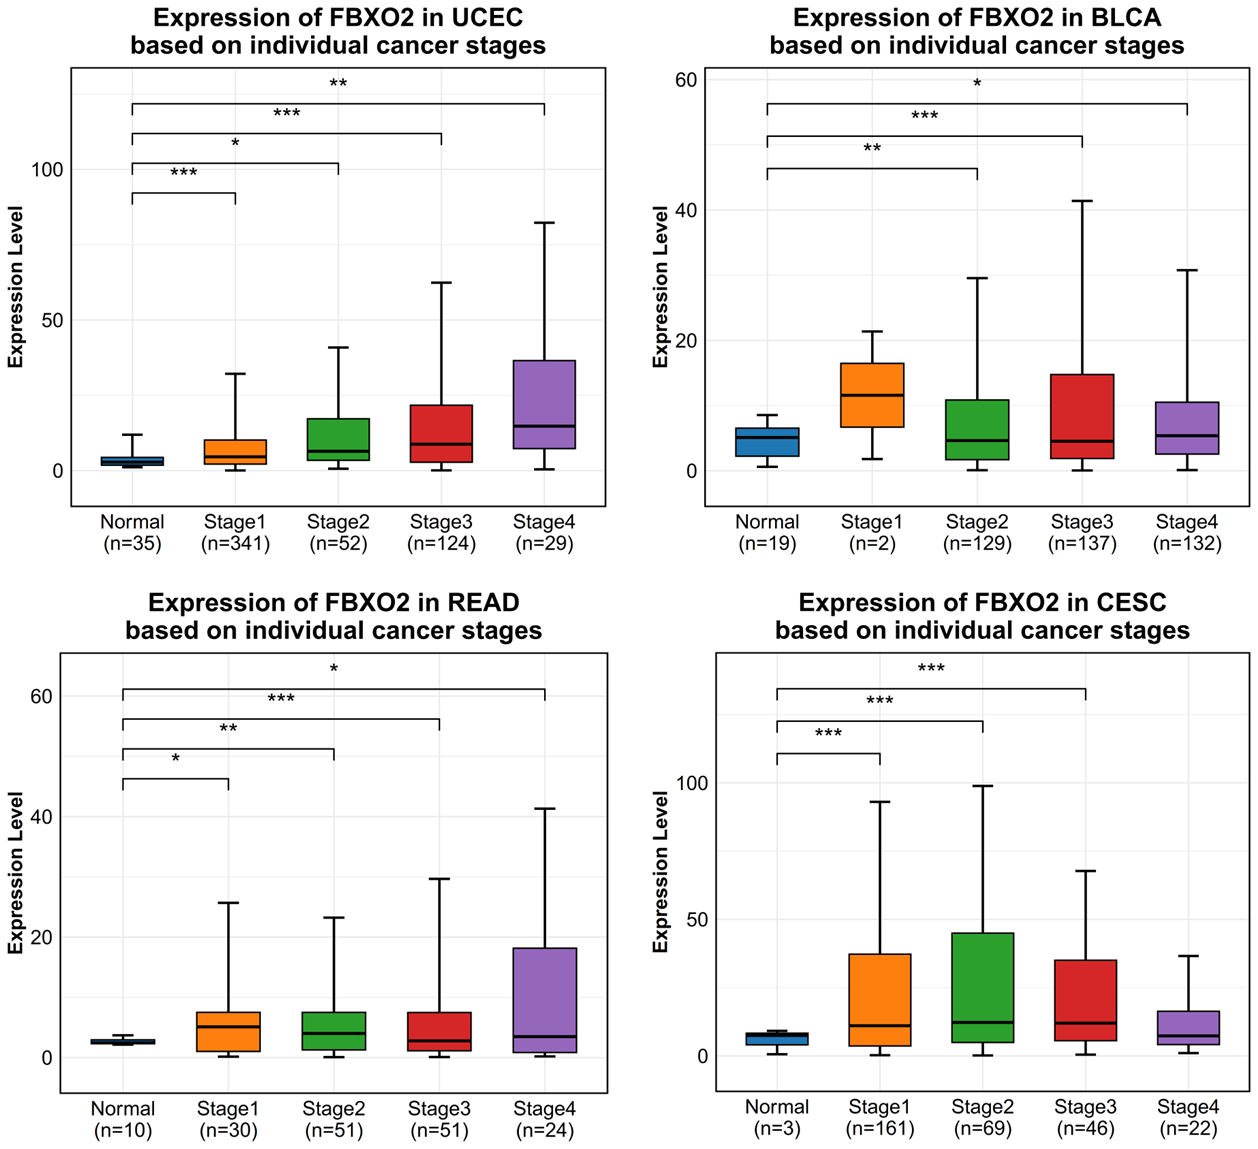
**

**Supplementary Figure 1**

Stage-specific FBXO2 expression patterns in UCEC, READ, BLCA, and CESC from the UALCAN database.

**
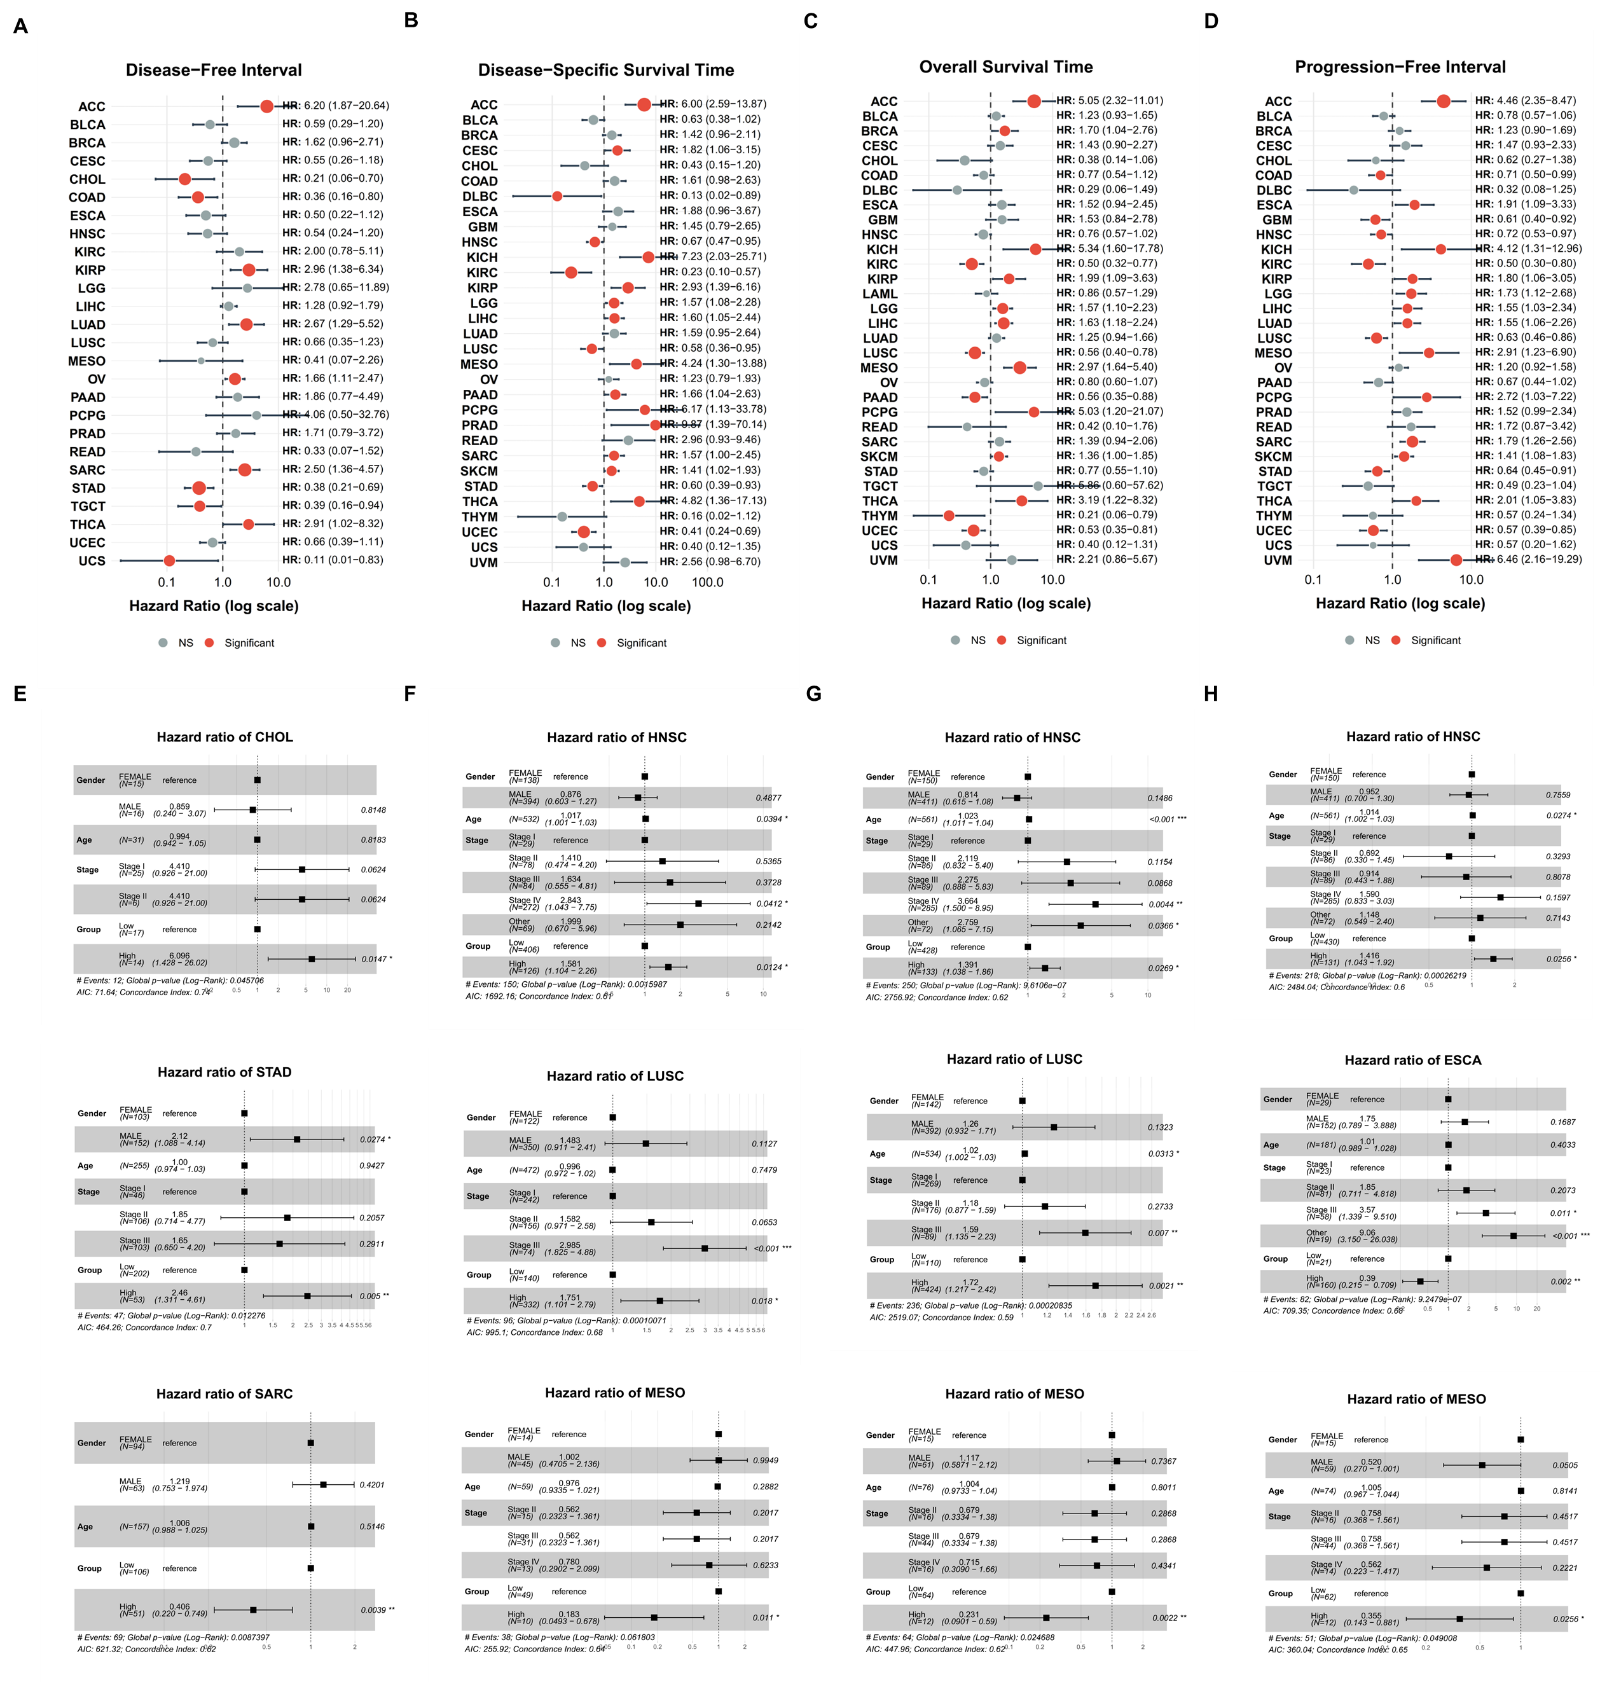
**

**Supplementary Figure 2**

Association Between FBXO2 Expression Levels and Multiple Cancer Survival Outcomes**. (A-D)** Forest plots showing pan-cancer associations between FBXO2 expression and OS, DSS, DFI, and PFI. **(E-H)** Cox proportional hazards regression analyses demonstrating the prognostic value of FBXO2 expression for disease-free interval (DFI for E), disease-specific survival (DSS for F), overall survival (OS for G), and progression-free interval (PFI for H). Hazard ratios (HRs) with 95% confidence intervals (CIs) quantify the risk associated with relapse-free survival (RFS). Statistical significance was set at *p* < 0.05.

**
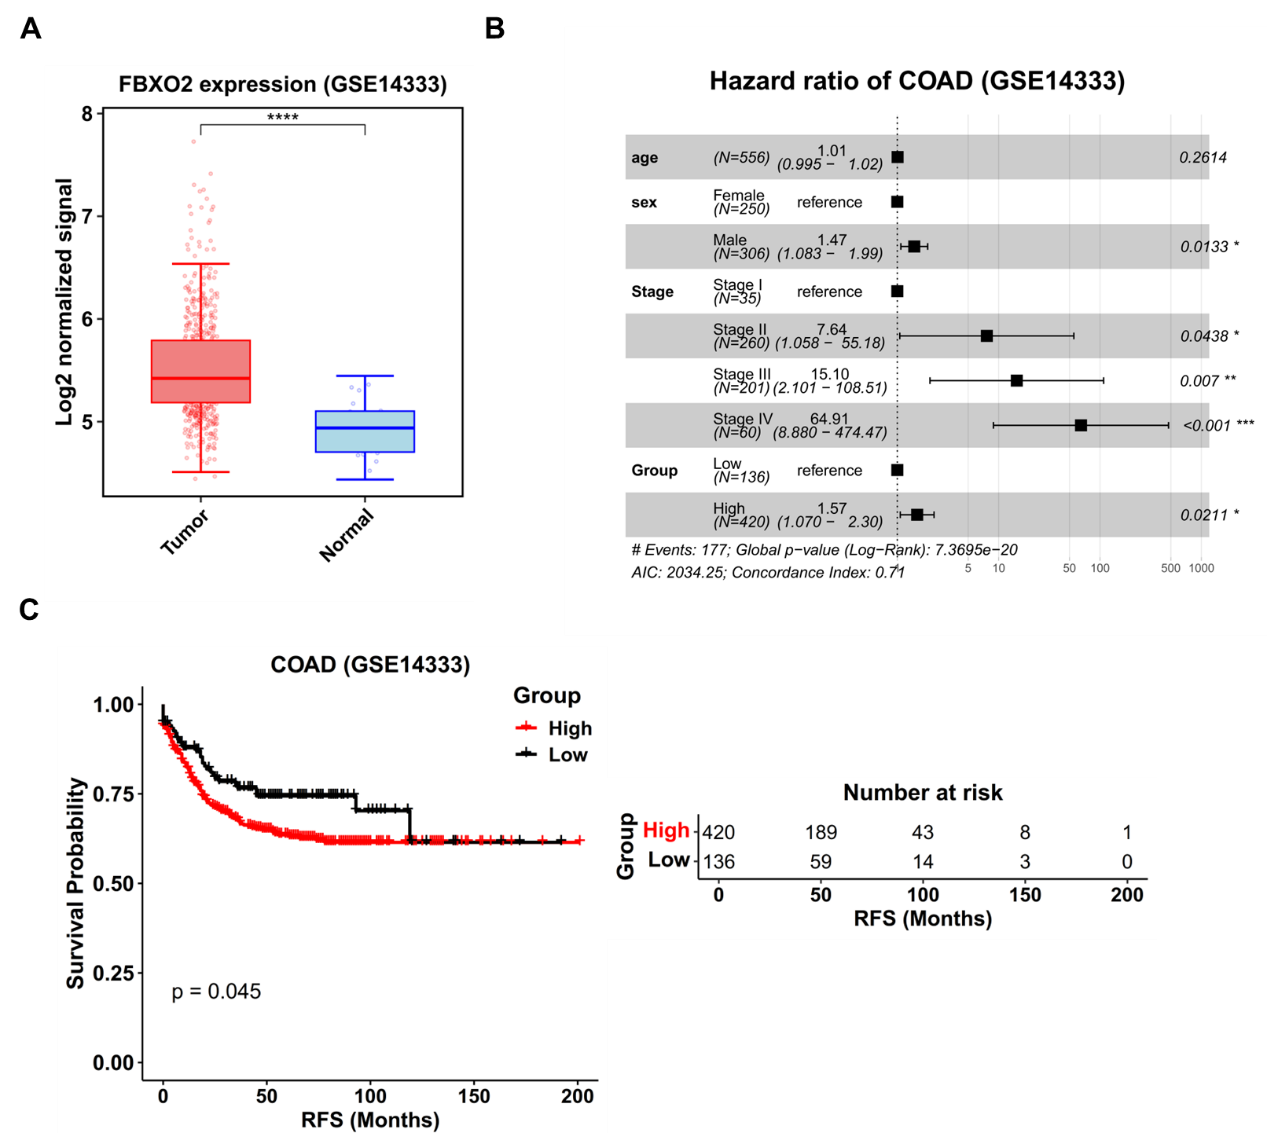
**

**Supplementary Figure 3**

Validation of FBXO2 expression and prognostic significance in the GSE39582 cohort. **(A)** FBXO2 expression in normal vs. tumor tissues. **(B)** Kaplan-Meier analysis of FBXO2 and relapse-free survival (RFS) (*p* < 0.045). **(C)** Cox regression showing an association between FBXO2 expression and RFS (HR = 1.57, 95% CI = 1.070-2.30, *p* < 0.05).

**
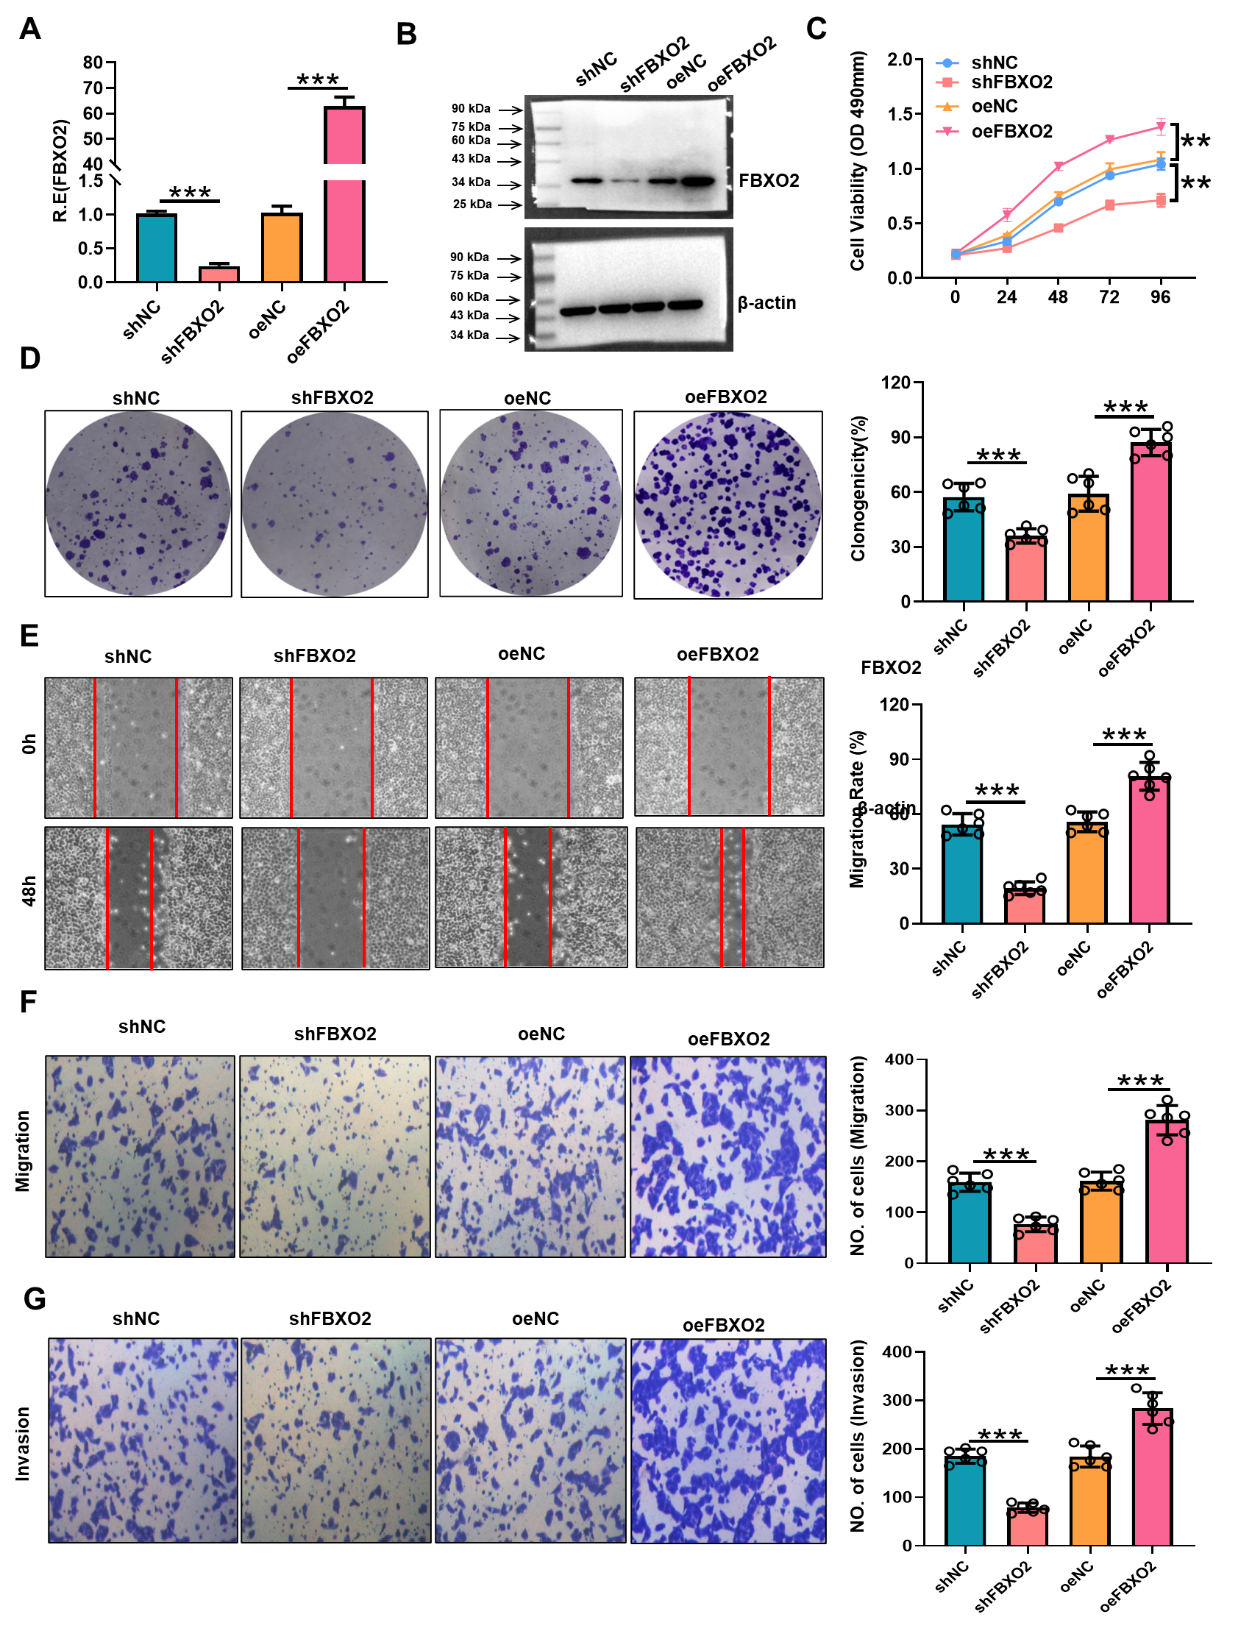
**

**Supplementary Figure 4**

FBXO2 enhances proliferation and migration of Caco2 cells. **(A)** qRT-PCR detection of FBXO2 expression efficiency in Caco2 cells. **(B)** Western blot validation of FBXO2 protein expression levels. **(C)** CCK-8 assay detection of cell proliferation activity within 96 hours for each group(n=6). **(D)** Colony formation assay detection of cell clonogenic ability(n=6). **(E)** Wound healing assay detection of cell migration ability at 0h and 48h(n=6). **(F)** Migration assay detection of transmembrane cell count(n=6). **(G)** Invasion assay detection of transmembrane cell count(n=6).

shFBXO2: knockdown group; shNC: knockdown control; oeFBXO2: overexpression group; oeNC: overexpression control. Data are presented as mean ± SD. Statistical analysis was performed using Student’s t-test; *P < 0.05, **P < 0.01, ***P < 0.001.


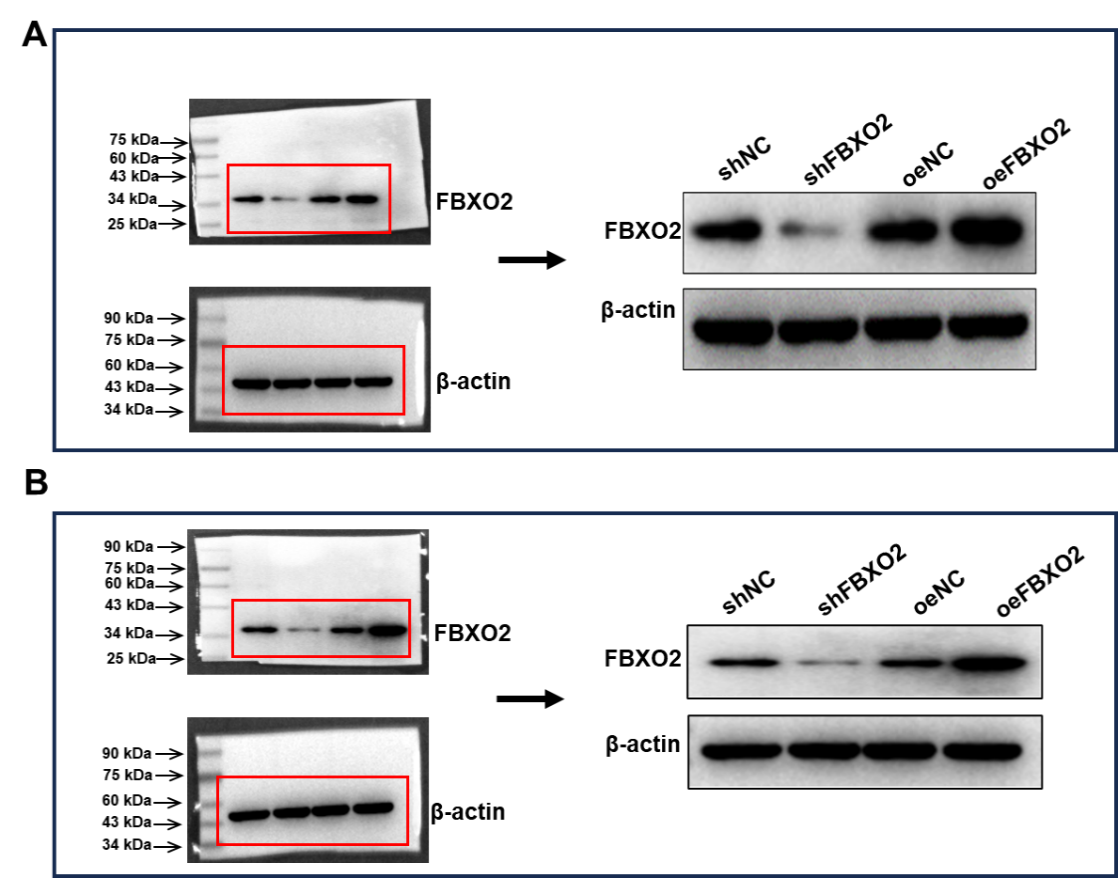


**Supplementary Figure 5**

A complete gel image corresponding to the Western blot results.

Complete gel image used in Figure 9B, with a red rectangular box indicating the target band area selected for presentation and quantitative analysis. Molecular weight markers are labeled in the images (left).

**Table S1.** **| Reagents and oligoes used in this study.**

| REAGENT, RESOURCE OR OLIGOES | SOURCE | IDENTIFIER |
| --- | --- | --- |
| Antibodies | | |
| β-Actin Antibody | Santa Cruz | Cat:sc-47778 RRID: AB_626632 |
| FBXO2 Polyclonal antibody | Proteintech | Cat: 14590-1-AP RRID: AB_2104394 |
| CD56 Polyclonal antibody | Proteintech | Cat: 14255-1-AP RRID: AB_2149421 |
| Oligonucleotides for qRT-PCR | | |
| Human GAPDH FW | BGI | 5’-TCAAGAAGGTGGTGAAGCAGG-3’ |
| Human GAPDH REV | BGI | 5’- AGCGTCAAAGGTGGAGGAGTG-3’ |
| Human FBXO2 FW | BGI | 5’- CAACCTTCTGCGTAACCCGT-3’ |
| Human FBXO2 REV | BGI | 5’- CTGTGCTTTGCGACACCACT-3’ |
| shRNAs used in this study | | |
| FBXO2 | Ribobio | 5’- CGAGCUCACCGUUAAGCUACU-3’ |
| Cells used in this study | | |
| HCT116 | ATCC | CCL-247 |
| Caco-2 | ATCC | HTB-37 |
| Other |  |  |
| DMEM | Gibco | Cat: 11965118 |
| FBS | Gibco | Cat:10099141 |
| Cell Counting Kit-8 | MCE | Cat: HY-K0301 |
| Trizol | Life technologies | Cat:15596018 |
